# Supplementary material for: Robust T cell activation requires an eIF3-driven burst in T cell receptor translation
Source: eLife journal article supplement (doi:10.7554/elife.74272), 2021-12-31
Supplement: supp [file DeSilva_Figure6-figure-suppement-4.xlsx]

## Sheet: N-24hrs
		NALM6	NALM6	T cells	T cells	Normalized live T cells	NALM6 dead %	CAR-T cells live %
	Sample:	dead cells	live cells	dead cells	live cells	(to 1:1 WPRE)
	24hrs_NALM6_500IL2_Don2_rep1_Experiment_Control_1-1A.fcs	476	2058	1098	4065	1.43843	18.7845	78.7333		CAR-T to B tumor ratio		Control			WPRE			LTR			TCRB
	24hrs_NALM6_500IL2_Don2_rep1_Experiment_Control_1-1B.fcs	513	1996	1115	4059	1.43631	20.4464	78.4499		_2-1	30.4097	25.1012	26.4547	66.7822	55.1803	55.2349	61.6117	57.4677	59.2073	62.6717	59.7419	62.129
	24hrs_NALM6_500IL2_Don2_rep1_Experiment_Control_1-1C.fcs	495	2099	1032	3991	1.41224	19.0825	79.4545		_1-1	18.7845	20.4464	19.0825	39.2484	37.474	38.8283	40.7583	43.3051	39.7599	42.6173	45.3626	46.7501
	24hrs_NALM6_500IL2_Don2_rep1_Experiment_Control_1-2A.fcs	688	2965	803	2901	1.02654	18.8338	78.3207		_1-2	18.8338	18.1922	16.709	31.2341	30.8302	31.7272	32.9923	33.7174	32.2056	39.2493	36.5452	36.7935
	24hrs_NALM6_500IL2_Don2_rep1_Experiment_Control_1-2B.fcs	636	2860	760	2919	1.03291	18.1922	79.3422		_1-4	17.688	19.4829	23.3708	26.8669	29.703	34.7872	26.7036	26.6622	33.8492	32.0683	33.6334	36.9024
	24hrs_NALM6_500IL2_Don2_rep1_Experiment_Control_1-2C.fcs	592	2951	750	3022	1.06936	16.709	80.1166
	24hrs_NALM6_500IL2_Don2_rep1_Experiment_Control_1-4A.fcs	814	3788	465	1874	0.663128	17.688	80.1197
	24hrs_NALM6_500IL2_Don2_rep1_Experiment_Control_1-4B.fcs	859	3550	468	1968	0.696391	19.4829	80.7882		CAR-T to B tumor ratio		Cntrl T cells			WPRE T cells			LTR T cells			TCRB T cells
	24hrs_NALM6_500IL2_Don2_rep1_Experiment_Control_1-4C.fcs	1040	3410	528	2003	0.708776	23.3708	79.1387		_2-1	1.69745	1.74133	1.68117	1.18896	1.25513	1.21338	1.20984	1.26327	1.17233	1.15499	1.26044	1.20134
	24hrs_NALM6_500IL2_Don2_rep1_Experiment_Control_2-1A.fcs	475	1087	1684	4797	1.69745	30.4097	74.0164		_1-1	1.43843	1.43631	1.41224	1.00743	1.02725	0.965322	1.03786	1.01168	1.01522	1.07962	1.0414	1.08811
	24hrs_NALM6_500IL2_Don2_rep1_Experiment_Control_2-1B.fcs	372	1110	1583	4921	1.74133	25.1012	75.6611		_1-2	1.02654	1.03291	1.06936	0.672682	0.665605	0.678344	0.70913	0.728592	0.756192	0.885704	0.849257	0.870842
	24hrs_NALM6_500IL2_Don2_rep1_Experiment_Control_2-1C.fcs	391	1087	1709	4751	1.68117	26.4547	73.5449		_1-4	0.663128	0.696391	0.708776	0.45046	0.468507	0.439844	0.498938	0.523355	0.517693	0.734253	0.708068	0.69356
	Sample:	Lymphocytes/Single Cells/dead cells/NALM6_cells | Count	Lymphocytes/Single Cells/Live cells/NALM6_cells | Count	Lymphocytes/Single Cells/dead cells/CAR-T cells | Count	Lymphocytes/Single Cells/Live cells/CAR-T cells | Count
	24hrs_NALM6_500IL2_Don2_rep1_Experiment_WPRE_1-1A.fcs	1128	1746	1490	2847	1.00743	39.2484	65.6445
	24hrs_NALM6_500IL2_Don2_rep1_Experiment_WPRE_1-1B.fcs	1080	1802	1508	2903	1.02725	37.474	65.8127
	24hrs_NALM6_500IL2_Don2_rep1_Experiment_WPRE_1-1C.fcs	1140	1796	1490	2728	0.965322	38.8283	64.6752
	24hrs_NALM6_500IL2_Don2_rep1_Experiment_WPRE_1-2A.fcs	1225	2697	931	1901	0.672682	31.2341	67.1257
	24hrs_NALM6_500IL2_Don2_rep1_Experiment_WPRE_1-2B.fcs	1244	2791	937	1881	0.665605	30.8302	66.7495
	24hrs_NALM6_500IL2_Don2_rep1_Experiment_WPRE_1-2C.fcs	1284	2763	1020	1917	0.678344	31.7272	65.2707
	24hrs_NALM6_500IL2_Don2_rep1_Experiment_WPRE_1-4A.fcs	1270	3457	594	1273	0.45046	26.8669	68.1843
	24hrs_NALM6_500IL2_Don2_rep1_Experiment_WPRE_1-4B.fcs	1380	3266	547	1324	0.468507	29.703	70.7643
	24hrs_NALM6_500IL2_Don2_rep1_Experiment_WPRE_1-4C.fcs	1659	3110	615	1243	0.439844	34.7872	66.8999
	24hrs_NALM6_500IL2_Don2_rep1_Experiment_WPRE_2-1A.fcs	1156	575	2464	3360	1.18896	66.7822	57.6923
	24hrs_NALM6_500IL2_Don2_rep1_Experiment_WPRE_2-1B.fcs	964	783	2233	3547	1.25513	55.1803	61.3668
	24hrs_NALM6_500IL2_Don2_rep1_Experiment_WPRE_2-1C.fcs	976	791	2222	3429	1.21338	55.2349	60.6795
	Sample:	Lymphocytes/Single Cells/dead cells/NALM6_cells | Count	Lymphocytes/Single Cells/Live cells/NALM6_cells | Count	Lymphocytes/Single Cells/dead cells/CAR-T cells | Count	Lymphocytes/Single Cells/Live cells/CAR-T cells | Count
	24hrs_NALM6_500IL2_Don2_rep1_Experiment_LTR_1-1A.fcs	1118	1625	1536	2933	1.03786	40.7583	65.6299
	24hrs_NALM6_500IL2_Don2_rep1_Experiment_LTR_1-1B.fcs	1174	1537	1631	2859	1.01168	43.3051	63.6748
	24hrs_NALM6_500IL2_Don2_rep1_Experiment_LTR_1-1C.fcs	1126	1706	1466	2869	1.01522	39.7599	66.1822
	24hrs_NALM6_500IL2_Don2_rep1_Experiment_LTR_1-2A.fcs	1290	2620	1010	2004	0.70913	32.9923	66.4897
	24hrs_NALM6_500IL2_Don2_rep1_Experiment_LTR_1-2B.fcs	1317	2589	921	2059	0.728592	33.7174	69.094
	24hrs_NALM6_500IL2_Don2_rep1_Experiment_LTR_1-2C.fcs	1247	2625	968	2137	0.756192	32.2056	68.8245
	24hrs_NALM6_500IL2_Don2_rep1_Experiment_LTR_1-4A.fcs	1254	3442	614	1410	0.498938	26.7036	69.664
	24hrs_NALM6_500IL2_Don2_rep1_Experiment_LTR_1-4B.fcs	1207	3320	610	1479	0.523355	26.6622	70.7994
	24hrs_NALM6_500IL2_Don2_rep1_Experiment_LTR_1-4C.fcs	1553	3035	640	1463	0.517693	33.8492	69.5673
	24hrs_NALM6_500IL2_Don2_rep1_Experiment_LTR_2-1A.fcs	971	605	2399	3419	1.20984	61.6117	58.7659
	24hrs_NALM6_500IL2_Don2_rep1_Experiment_LTR_2-1B.fcs	935	692	2136	3570	1.26327	57.4677	62.5657
	24hrs_NALM6_500IL2_Don2_rep1_Experiment_LTR_2-1C.fcs	971	669	2253	3313	1.17233	59.2073	59.5221
	Sample:	Lymphocytes/Single Cells/dead cells/NALM6_cells | Count	Lymphocytes/Single Cells/Live cells/NALM6_cells | Count	Lymphocytes/Single Cells/dead cells/CAR-T cells | Count	Lymphocytes/Single Cells/Live cells/CAR-T cells | Count
	24hrs_NALM6_500IL2_Don2_rep1_Experiment_TCRB_1-1A.fcs	1117	1504	1655	3051	1.07962	42.6173	64.8321
	24hrs_NALM6_500IL2_Don2_rep1_Experiment_TCRB_1-1B.fcs	1076	1296	1766	2943	1.0414	45.3626	62.4973
	24hrs_NALM6_500IL2_Don2_rep1_Experiment_TCRB_1-1C.fcs	1158	1319	1672	3075	1.08811	46.7501	64.7778
	24hrs_NALM6_500IL2_Don2_rep1_Experiment_TCRB_1-2A.fcs	1349	2088	1233	2503	0.885704	39.2493	66.9968
	24hrs_NALM6_500IL2_Don2_rep1_Experiment_TCRB_1-2B.fcs	1244	2160	1235	2400	0.849257	36.5452	66.0248
	24hrs_NALM6_500IL2_Don2_rep1_Experiment_TCRB_1-2C.fcs	1276	2192	1181	2461	0.870842	36.7935	67.5728
	24hrs_NALM6_500IL2_Don2_rep1_Experiment_TCRB_1-4A.fcs	1259	2667	937	2075	0.734253	32.0683	68.8911
	24hrs_NALM6_500IL2_Don2_rep1_Experiment_TCRB_1-4B.fcs	1345	2654	876	2001	0.708068	33.6334	69.5516
	24hrs_NALM6_500IL2_Don2_rep1_Experiment_TCRB_1-4C.fcs	1482	2534	962	1960	0.69356	36.9024	67.0773
	24hrs_NALM6_500IL2_Don2_rep1_Experiment_TCRB_2-1A.fcs	1004	598	2550	3264	1.15499	62.6717	56.1404
	24hrs_NALM6_500IL2_Don2_rep1_Experiment_TCRB_2-1B.fcs	972	655	2234	3562	1.26044	59.7419	61.4562
	24hrs_NALM6_500IL2_Don2_rep1_Experiment_TCRB_2-1C.fcs	963	587	2282	3395	1.20134	62.129	59.8027

## Sheet: N-48hrs
						Normalized live T cells	NALM6 dead %	CAR-T cells live %
	Sample:	Lymphocytes/Single Cells/dead cells/NALM6_cells | Count	Lymphocytes/Single Cells/Live cells/NALM6_cells | Count	Lymphocytes/Single Cells/dead cells/CAR-T cells | Count	Lymphocytes/Single Cells/Live cells/CAR-T cells | Count	(to 1:1 WPRE)
	48hrs_NALM6_500IL2_Don2_rep1_Experiment_Control_1-1A.fcs	1333	646	1995	3497	1.35315	67.3573	63.6744		CAR-T to B tumor ratio		Control			WPRE			LTR			TCRB
	48hrs_NALM6_500IL2_Don2_rep1_Experiment_Control_1-1B.fcs	1251	847	1670	3635	1.40655	59.6282	68.5203		_2-1	69.4377	75.3682	66.6667	90.8134	89.6552	86.8722	91.1266	90.1921	88.574	92.6113	92.0379	92.6712
	48hrs_NALM6_500IL2_Don2_rep1_Experiment_Control_1-1C.fcs	1198	831	1643	3823	1.4793	59.0439	69.9415		_1-1	67.3573	59.6282	59.0439	74.7162	76.047	75.5208	78.7293	78.5152	80.2582	80.4893	81.4511	80.0685
	48hrs_NALM6_500IL2_Don2_rep1_Experiment_Control_1-2A.fcs	1517	1368	1018	3392	1.31252	52.5823	76.9161		_1-2	52.5823	58.2924	57.8766	65.0145	62.6276	63.5674	69.2799	69.9156	69.8625	76.2677	75.6678	72.2395
	48hrs_NALM6_500IL2_Don2_rep1_Experiment_Control_1-2B.fcs	1782	1275	1203	3174	1.22817	58.2924	72.5154		_1-4	54.8643	49.5722	58.4954	60.5373	59.3726	65.912	58.2648	62.4728	66.2942	66.492	67.1233	71.2059
	48hrs_NALM6_500IL2_Don2_rep1_Experiment_Control_1-2C.fcs	1679	1222	1047	3262	1.26222	57.8766	75.702
	48hrs_NALM6_500IL2_Don2_rep1_Experiment_Control_1-4A.fcs	1940	1596	672	2393	0.925964	54.8643	78.075
	48hrs_NALM6_500IL2_Don2_rep1_Experiment_Control_1-4B.fcs	1796	1827	595	2492	0.964272	49.5722	80.7256		CAR-T to B tumor ratio		Cntrl T cells			WPRE T cells			LTR T cells			TCRB T cells
	48hrs_NALM6_500IL2_Don2_rep1_Experiment_Control_1-4C.fcs	2045	1451	642	2551	0.987102	58.4954	79.8935		_2-1	1.62866	1.60506	1.55282	1.24055	1.251	1.32336	1.36283	1.32491	1.48742	1.28931	1.26919	1.3133
	48hrs_NALM6_500IL2_Don2_rep1_Experiment_Control_2-1A.fcs	852	375	2376	4209	1.62866	69.4377	63.918		_1-1	1.35315	1.40655	1.4793	0.982071	0.970076	1.04785	1.06178	1.0552	1.07455	1.09738	1.07378	1.07726
	48hrs_NALM6_500IL2_Don2_rep1_Experiment_Control_2-1B.fcs	921	301	2487	4148	1.60506	75.3682	62.517		_1-2	1.31252	1.22817	1.26222	0.698826	0.692635	0.677931	0.797498	0.762673	0.779698	0.850123	0.872565	0.869857
	48hrs_NALM6_500IL2_Don2_rep1_Experiment_Control_2-1C.fcs	802	401	2217	4013	1.55282	66.6667	64.4141		_1-4	0.925964	0.964272	0.987102	0.518896	0.546756	0.506127	0.626467	0.626854	0.613698	0.788598	0.812589	0.748742
	Sample:	Lymphocytes/Single Cells/dead cells/NALM6_cells | Count	Lymphocytes/Single Cells/Live cells/NALM6_cells | Count	Lymphocytes/Single Cells/dead cells/CAR-T cells | Count	Lymphocytes/Single Cells/Live cells/CAR-T cells | Count
	48hrs_NALM6_500IL2_Don2_rep1_Experiment_WPRE_1-1A.fcs	1448	490	2298	2538	0.982071	74.7162	52.4814
	48hrs_NALM6_500IL2_Don2_rep1_Experiment_WPRE_1-1B.fcs	1489	469	2138	2507	0.970076	76.047	53.972
	48hrs_NALM6_500IL2_Don2_rep1_Experiment_WPRE_1-1C.fcs	1450	470	2339	2708	1.04785	75.5208	53.6556
	48hrs_NALM6_500IL2_Don2_rep1_Experiment_WPRE_1-2A.fcs	2020	1087	1590	1806	0.698826	65.0145	53.1802
	48hrs_NALM6_500IL2_Don2_rep1_Experiment_WPRE_1-2B.fcs	1902	1135	1649	1790	0.692635	62.6276	52.05
	48hrs_NALM6_500IL2_Don2_rep1_Experiment_WPRE_1-2C.fcs	1928	1105	1563	1752	0.677931	63.5674	52.8507
	48hrs_NALM6_500IL2_Don2_rep1_Experiment_WPRE_1-4A.fcs	2456	1601	876	1341	0.518896	60.5373	60.4871
	48hrs_NALM6_500IL2_Don2_rep1_Experiment_WPRE_1-4B.fcs	2309	1580	911	1413	0.546756	59.3726	60.8003
	48hrs_NALM6_500IL2_Don2_rep1_Experiment_WPRE_1-4C.fcs	2562	1325	939	1308	0.506127	65.912	58.2109
	48hrs_NALM6_500IL2_Don2_rep1_Experiment_WPRE_2-1A.fcs	949	96	2711	3206	1.24055	90.8134	54.1829
	48hrs_NALM6_500IL2_Don2_rep1_Experiment_WPRE_2-1B.fcs	988	114	2755	3233	1.251	89.6552	53.9913
	48hrs_NALM6_500IL2_Don2_rep1_Experiment_WPRE_2-1C.fcs	986	149	2472	3420	1.32336	86.8722	58.0448
	Sample:	Lymphocytes/Single Cells/dead cells/NALM6_cells | Count	Lymphocytes/Single Cells/Live cells/NALM6_cells | Count	Lymphocytes/Single Cells/dead cells/CAR-T cells | Count	Lymphocytes/Single Cells/Live cells/CAR-T cells | Count
	48hrs_NALM6_500IL2_Don2_rep1_Experiment_LTR_1-1A.fcs	1425	385	2119	2744	1.06178	78.7293	56.4261
	48hrs_NALM6_500IL2_Don2_rep1_Experiment_LTR_1-1B.fcs	1396	382	2126	2727	1.0552	78.5152	56.192
	48hrs_NALM6_500IL2_Don2_rep1_Experiment_LTR_1-1C.fcs	1492	367	2024	2777	1.07455	80.2582	57.8421
	48hrs_NALM6_500IL2_Don2_rep1_Experiment_LTR_1-2A.fcs	1953	866	1615	2061	0.797498	69.2799	56.0664
	48hrs_NALM6_500IL2_Don2_rep1_Experiment_LTR_1-2B.fcs	1987	855	1741	1971	0.762673	69.9156	53.0981
	48hrs_NALM6_500IL2_Don2_rep1_Experiment_LTR_1-2C.fcs	1982	855	1691	2015	0.779698	69.8625	54.3713
	48hrs_NALM6_500IL2_Don2_rep1_Experiment_LTR_1-4A.fcs	2196	1573	901	1619	0.626467	58.2648	64.246
	48hrs_NALM6_500IL2_Don2_rep1_Experiment_LTR_1-4B.fcs	2294	1378	992	1620	0.626854	62.4728	62.0214
	48hrs_NALM6_500IL2_Don2_rep1_Experiment_LTR_1-4C.fcs	2551	1297	916	1586	0.613698	66.2942	63.3893
	48hrs_NALM6_500IL2_Don2_rep1_Experiment_LTR_2-1A.fcs	914	89	2785	3522	1.36283	91.1266	55.8427
	48hrs_NALM6_500IL2_Don2_rep1_Experiment_LTR_2-1B.fcs	892	97	2699	3424	1.32491	90.1921	55.9203
	48hrs_NALM6_500IL2_Don2_rep1_Experiment_LTR_2-1C.fcs	1000	129	2599	3844	1.48742	88.574	59.6616
	Sample:	Lymphocytes/Single Cells/dead cells/NALM6_cells | Count	Lymphocytes/Single Cells/Live cells/NALM6_cells | Count	Lymphocytes/Single Cells/dead cells/CAR-T cells | Count	Lymphocytes/Single Cells/Live cells/CAR-T cells | Count
	48hrs_NALM6_500IL2_Don2_rep1_Experiment_TCRB_1-1A.fcs	1349	327	2350	2836	1.09738	80.4893	54.6857
	48hrs_NALM6_500IL2_Don2_rep1_Experiment_TCRB_1-1B.fcs	1392	317	2342	2775	1.07378	81.4511	54.231
	48hrs_NALM6_500IL2_Don2_rep1_Experiment_TCRB_1-1C.fcs	1402	349	2177	2784	1.07726	80.0685	56.1177
	48hrs_NALM6_500IL2_Don2_rep1_Experiment_TCRB_1-2A.fcs	1835	571	2038	2197	0.850123	76.2677	51.8772
	48hrs_NALM6_500IL2_Don2_rep1_Experiment_TCRB_1-2B.fcs	1813	583	2121	2255	0.872565	75.6678	51.5311
	48hrs_NALM6_500IL2_Don2_rep1_Experiment_TCRB_1-2C.fcs	1629	626	2010	2248	0.869857	72.2395	52.7947
	48hrs_NALM6_500IL2_Don2_rep1_Experiment_TCRB_1-4A.fcs	2030	1023	1435	2038	0.788598	66.492	58.6813
	48hrs_NALM6_500IL2_Don2_rep1_Experiment_TCRB_1-4B.fcs	2107	1032	1349	2100	0.812589	67.1233	60.8872
	48hrs_NALM6_500IL2_Don2_rep1_Experiment_TCRB_1-4C.fcs	2238	905	1432	1935	0.748742	71.2059	57.4696
	48hrs_NALM6_500IL2_Don2_rep1_Experiment_TCRB_2-1A.fcs	915	73	2860	3332	1.28931	92.6113	53.8114
	48hrs_NALM6_500IL2_Don2_rep1_Experiment_TCRB_2-1B.fcs	971	84	2738	3280	1.26919	92.0379	54.5032
	48hrs_NALM6_500IL2_Don2_rep1_Experiment_TCRB_2-1C.fcs	961	76	2453	3394	1.3133	92.6712	58.0469

## Sheet: N-72hrs
						Normalized live T cells	NALM6 dead %	CAR-T cells live %
	Sample:	Lymphocytes/Single Cells/dead cells/NALM6_cells | Count	Lymphocytes/Single Cells/Live cells/NALM6_cells | Count	Lymphocytes/Single Cells/dead cells/CAR-T cells | Count	Lymphocytes/Single Cells/Live cells/CAR-T cells | Count	(to 1:1 WPRE)
	72hrs_NALM6_500IL2_Don2_rep1_Experiment_Control_1-1A.fcs	1276	260	2173	3467	0.967085	83.0729	61.4716		CAR-T to B tumor ratio		Control			WPRE			LTR			TCRB
	72hrs_NALM6_500IL2_Don2_rep1_Experiment_Control_1-1B.fcs	1222	265	2145	3521	0.982148	82.1789	62.1426		_2-1	86.2857	86.7876	85.8437	96.5164	96.1957	94.4742	96.5116	98.3696	96.1749	98.8212	96.6851	97.1979
	72hrs_NALM6_500IL2_Don2_rep1_Experiment_Control_1-1C.fcs	1223	277	2113	3496	0.975174	81.5333	62.3284		_1-1	83.0729	82.1789	81.5333	91.1435	89.2899	89.8455	93.6524	92.2902	95.443	93.0372	93.2203	92.562
	72hrs_NALM6_500IL2_Don2_rep1_Experiment_Control_1-2A.fcs	1798	501	1552	3228	0.900418	78.2079	67.5314		_1-2	78.2079	78.9062	77.8195	82.8492	87.1616	83.2461	86.4336	86.8665	85.5593	87.012	88.023	87.3817
	72hrs_NALM6_500IL2_Don2_rep1_Experiment_Control_1-2B.fcs	1818	486	1628	3031	0.845467	78.9062	65.0569		_1-4	76.5452	75.4145	77.9435	76.7213	80.3601	80.4071	80.054	80.6127	83.2756	84.5122	85.0156	86.7839
	72hrs_NALM6_500IL2_Don2_rep1_Experiment_Control_1-2C.fcs	1863	531	1499	3132	0.87364	77.8195	67.6312
	72hrs_NALM6_500IL2_Don2_rep1_Experiment_Control_1-4A.fcs	2415	740	1003	2687	0.749512	76.5452	72.8184
	72hrs_NALM6_500IL2_Don2_rep1_Experiment_Control_1-4B.fcs	2365	771	873	2698	0.75258	75.4145	75.5531		CAR-T to B tumor ratio		Cntrl T cells			WPRE T cells			LTR T cells			TCRB T cells
	72hrs_NALM6_500IL2_Don2_rep1_Experiment_Control_1-4C.fcs	2509	710	942	2617	0.729986	77.9435	73.5319		_2-1	1.09958	1.11883	1.18103	1.36541	1.30683	1.25077	1.33947	1.16234	1.1417	1.22929	1.11213	1.11018
	72hrs_NALM6_500IL2_Don2_rep1_Experiment_Control_2-1A.fcs	755	120	2530	3942	1.09958	86.2857	60.9085		_1-1	0.967085	0.982148	0.975174	1.02901	0.968201	1.00279	1.02789	0.96318	0.923849	1.02483	0.933054	0.977127
	72hrs_NALM6_500IL2_Don2_rep1_Experiment_Control_2-1B.fcs	670	102	2473	4011	1.11883	86.7876	61.86		_1-2	0.900418	0.845467	0.87364	0.900139	0.866667	0.89735	0.878103	0.856067	0.876151	0.903208	0.898466	0.904881
	72hrs_NALM6_500IL2_Don2_rep1_Experiment_Control_2-1C.fcs	758	125	2231	4234	1.18103	85.8437	65.4911		_1-4	0.749512	0.75258	0.729986	0.73166	0.655788	0.699024	0.689261	0.728591	0.665272	0.828452	0.791353	0.76318
	Sample:	Lymphocytes/Single Cells/dead cells/NALM6_cells | Count	Lymphocytes/Single Cells/Live cells/NALM6_cells | Count	Lymphocytes/Single Cells/dead cells/CAR-T cells | Count	Lymphocytes/Single Cells/Live cells/CAR-T cells | Count
	72hrs_NALM6_500IL2_Don2_rep1_Experiment_WPRE_1-1A.fcs	813	79	2512	3689	1.02901	91.1435	59.4904
	72hrs_NALM6_500IL2_Don2_rep1_Experiment_WPRE_1-1B.fcs	767	92	2682	3471	0.968201	89.2899	56.4115
	72hrs_NALM6_500IL2_Don2_rep1_Experiment_WPRE_1-1C.fcs	814	92	2647	3595	1.00279	89.8455	57.5937
	72hrs_NALM6_500IL2_Don2_rep1_Experiment_WPRE_1-2A.fcs	1198	248	2136	3227	0.900139	82.8492	60.1715
	72hrs_NALM6_500IL2_Don2_rep1_Experiment_WPRE_1-2B.fcs	1127	166	2216	3107	0.866667	87.1616	58.3693
	72hrs_NALM6_500IL2_Don2_rep1_Experiment_WPRE_1-2C.fcs	1113	224	2351	3217	0.89735	83.2461	57.7766
	72hrs_NALM6_500IL2_Don2_rep1_Experiment_WPRE_1-4A.fcs	1638	497	1702	2623	0.73166	76.7213	60.6474
	72hrs_NALM6_500IL2_Don2_rep1_Experiment_WPRE_1-4B.fcs	1964	480	1588	2351	0.655788	80.3601	59.6852
	72hrs_NALM6_500IL2_Don2_rep1_Experiment_WPRE_1-4C.fcs	1896	462	1548	2506	0.699024	80.4071	61.8155
	72hrs_NALM6_500IL2_Don2_rep1_Experiment_WPRE_2-1A.fcs	471	17	2554	4895	1.36541	96.5164	65.7135
	72hrs_NALM6_500IL2_Don2_rep1_Experiment_WPRE_2-1B.fcs	531	21	2438	4685	1.30683	96.1957	65.7728
	72hrs_NALM6_500IL2_Don2_rep1_Experiment_WPRE_2-1C.fcs	530	31	2480	4484	1.25077	94.4742	64.3883
	Sample:	Lymphocytes/Single Cells/dead cells/NALM6_cells | Count	Lymphocytes/Single Cells/Live cells/NALM6_cells | Count	Lymphocytes/Single Cells/dead cells/CAR-T cells | Count	Lymphocytes/Single Cells/Live cells/CAR-T cells | Count
	72hrs_NALM6_500IL2_Don2_rep1_Experiment_LTR_1-1A.fcs	900	61	2277	3685	1.02789	93.6524	61.8081
	72hrs_NALM6_500IL2_Don2_rep1_Experiment_LTR_1-1B.fcs	814	68	2453	3453	0.96318	92.2902	58.466
	72hrs_NALM6_500IL2_Don2_rep1_Experiment_LTR_1-1C.fcs	754	36	2615	3312	0.923849	95.443	55.8799
	72hrs_NALM6_500IL2_Don2_rep1_Experiment_LTR_1-2A.fcs	1236	194	2065	3148	0.878103	86.4336	60.3875
	72hrs_NALM6_500IL2_Don2_rep1_Experiment_LTR_1-2B.fcs	1217	184	2181	3069	0.856067	86.8665	58.4571
	72hrs_NALM6_500IL2_Don2_rep1_Experiment_LTR_1-2C.fcs	1262	213	2119	3141	0.876151	85.5593	59.7148
	72hrs_NALM6_500IL2_Don2_rep1_Experiment_LTR_1-4A.fcs	1778	443	1675	2471	0.689261	80.054	59.5996
	72hrs_NALM6_500IL2_Don2_rep1_Experiment_LTR_1-4B.fcs	1763	424	1653	2612	0.728591	80.6127	61.2427
	72hrs_NALM6_500IL2_Don2_rep1_Experiment_LTR_1-4C.fcs	1922	386	1611	2385	0.665272	83.2756	59.6847
	72hrs_NALM6_500IL2_Don2_rep1_Experiment_LTR_2-1A.fcs	332	12	2194	4802	1.33947	96.5116	68.6392
	72hrs_NALM6_500IL2_Don2_rep1_Experiment_LTR_2-1B.fcs	543	9	2537	4167	1.16234	98.3696	62.1569
	72hrs_NALM6_500IL2_Don2_rep1_Experiment_LTR_2-1C.fcs	528	21	2519	4093	1.1417	96.1749	61.9026
	Sample:	Lymphocytes/Single Cells/dead cells/NALM6_cells | Count	Lymphocytes/Single Cells/Live cells/NALM6_cells | Count	Lymphocytes/Single Cells/dead cells/CAR-T cells | Count	Lymphocytes/Single Cells/Live cells/CAR-T cells | Count
	72hrs_NALM6_500IL2_Don2_rep1_Experiment_TCRB_1-1A.fcs	775	58	2456	3674	1.02483	93.0372	59.9347
	72hrs_NALM6_500IL2_Don2_rep1_Experiment_TCRB_1-1B.fcs	770	56	2704	3345	0.933054	93.2203	55.2984
	72hrs_NALM6_500IL2_Don2_rep1_Experiment_TCRB_1-1C.fcs	784	63	2440	3503	0.977127	92.562	58.9433
	72hrs_NALM6_500IL2_Don2_rep1_Experiment_TCRB_1-2A.fcs	1092	163	2175	3238	0.903208	87.012	59.819
	72hrs_NALM6_500IL2_Don2_rep1_Experiment_TCRB_1-2B.fcs	1073	146	2353	3221	0.898466	88.023	57.7861
	72hrs_NALM6_500IL2_Don2_rep1_Experiment_TCRB_1-2C.fcs	1108	160	2242	3244	0.904881	87.3817	59.1323
	72hrs_NALM6_500IL2_Don2_rep1_Experiment_TCRB_1-4A.fcs	1386	254	2092	2970	0.828452	84.5122	58.6725
	72hrs_NALM6_500IL2_Don2_rep1_Experiment_TCRB_1-4B.fcs	1634	288	1984	2837	0.791353	85.0156	58.8467
	72hrs_NALM6_500IL2_Don2_rep1_Experiment_TCRB_1-4C.fcs	1530	233	2072	2736	0.76318	86.7839	56.9052
	72hrs_NALM6_500IL2_Don2_rep1_Experiment_TCRB_2-1A.fcs	503	6	2526	4407	1.22929	98.8212	63.5656
	72hrs_NALM6_500IL2_Don2_rep1_Experiment_TCRB_2-1B.fcs	525	18	2689	3987	1.11213	96.6851	59.7214
	72hrs_NALM6_500IL2_Don2_rep1_Experiment_TCRB_2-1C.fcs	555	16	2565	3980	1.11018	97.1979	60.8098

## Sheet: J-24hrs
						Normalized live T cells	NALM6 dead %	CAR-T cells live %
	Sample:	Lymphocytes/Single Cells/dead cells/NALM6 cells | Count	Lymphocytes/Single Cells/Live cells/NALM6 cells | Count	Lymphocytes/Single Cells/dead cells/CAR-T cells | Count	Lymphocytes/Single Cells/Live cells/CAR-T cells | Count	(to 1:1 WPRE)
	24hrs_Jeko1_500U_IL2_don2_rep1_Experiment_Control_1-1A.fcs	995	971	1130	3889	1.24968	50.6104	77.4856		CAR-T to B tumor ratio		Control			WPRE			LTR			TCRB
	24hrs_Jeko1_500U_IL2_don2_rep1_Experiment_Control_1-1B.fcs	896	956	1136	3956	1.27121	48.3801	77.6905		_2-1	64.9621	58.9812	54.5037	73.4534	67.8492	66.1527	71.3808	67.5432	64.4911	69.8052	67.7075	68.2081
	24hrs_Jeko1_500U_IL2_don2_rep1_Experiment_Control_1-1C.fcs	922	1025	1149	3815	1.2259	47.3549	76.8533		_1-1	50.6104	48.3801	47.3549	73.6441	71.896	71.0305	69.8131	67.2472	67.7666	70.2193	71.4576	71.5299
	24hrs_Jeko1_500U_IL2_don2_rep1_Experiment_Control_1-2A.fcs	1128	1911	742	2814	0.904242	37.1175	79.1339		_1-2	37.1175	41.2327	39.8777	67.3004	68.6035	70.863	65.4721	61.9826	66.8579	68.9159	68.023	70.8318
	24hrs_Jeko1_500U_IL2_don2_rep1_Experiment_Control_1-2B.fcs	1251	1783	779	2776	0.892031	41.2327	78.0872		_1-4	26.0154	25.6655	25.8114	59.3856	55.8788	63.34	59.4147	62.3215	64.4186	65.5796	66.5171	67.6044
	24hrs_Jeko1_500U_IL2_don2_rep1_Experiment_Control_1-2C.fcs	1174	1770	747	2896	0.930591	39.8777	79.4949
	24hrs_Jeko1_500U_IL2_don2_rep1_Experiment_Control_1-4A.fcs	1012	2878	459	1827	0.587082	26.0154	79.9213
	24hrs_Jeko1_500U_IL2_don2_rep1_Experiment_Control_1-4B.fcs	1022	2960	474	1862	0.598329	25.6655	79.7089		CAR-T to B tumor ratio		Cntrl T cells			WPRE T cells			LTR T cells			TCRB T cells
	24hrs_Jeko1_500U_IL2_don2_rep1_Experiment_Control_1-4C.fcs	1002	2880	434	1873	0.601864	25.8114	81.1877		_2-1	1.509	1.52924	1.53374	1.20566	1.26896	1.26703	1.14685	1.25386	1.26896	1.15006	1.22943	1.24293
	24hrs_Jeko1_500U_IL2_don2_rep1_Experiment_Control_2-1A.fcs	686	370	1585	4696	1.509	64.9621	74.7652		_1-1	1.24968	1.27121	1.2259	1.01703	0.982648	1.00032	1.08708	1.04081	1.02667	1.0482	1.06298	1.0347
	24hrs_Jeko1_500U_IL2_don2_rep1_Experiment_Control_2-1B.fcs	660	459	1473	4759	1.52924	58.9812	76.3639		_1-2	0.904242	0.892031	0.930591	0.667738	0.697622	0.68509	0.693445	0.791774	0.747429	0.852185	0.882391	0.867288
	24hrs_Jeko1_500U_IL2_don2_rep1_Experiment_Control_2-1C.fcs	593	495	1486	4773	1.53374	54.5037	76.2582		_1-4	0.587082	0.598329	0.601864	0.373715	0.396208	0.393959	0.472044	0.475257	0.440231	0.673201	0.646208	0.609254
	Sample:	Lymphocytes/Single Cells/dead cells/NALM6 cells | Count	Lymphocytes/Single Cells/Live cells/NALM6 cells | Count	Lymphocytes/Single Cells/dead cells/CAR-T cells | Count	Lymphocytes/Single Cells/Live cells/CAR-T cells | Count
	24hrs_Jeko1_500U_IL2_don2_rep1_Experiment_WPRE_1-1A.fcs	1548	554	1414	3165	1.01703	73.6441	69.1199
	24hrs_Jeko1_500U_IL2_don2_rep1_Experiment_WPRE_1-1B.fcs	1604	627	1368	3058	0.982648	71.896	69.0917
	24hrs_Jeko1_500U_IL2_don2_rep1_Experiment_WPRE_1-1C.fcs	1606	655	1362	3113	1.00032	71.0305	69.5642
	24hrs_Jeko1_500U_IL2_don2_rep1_Experiment_WPRE_1-2A.fcs	2124	1032	940	2078	0.667738	67.3004	68.8535
	24hrs_Jeko1_500U_IL2_don2_rep1_Experiment_WPRE_1-2B.fcs	2137	978	995	2171	0.697622	68.6035	68.5723
	24hrs_Jeko1_500U_IL2_don2_rep1_Experiment_WPRE_1-2C.fcs	2291	942	966	2132	0.68509	70.863	68.8186
	24hrs_Jeko1_500U_IL2_don2_rep1_Experiment_WPRE_1-4A.fcs	2455	1679	555	1163	0.373715	59.3856	67.695
	24hrs_Jeko1_500U_IL2_don2_rep1_Experiment_WPRE_1-4B.fcs	2343	1850	588	1233	0.396208	55.8788	67.71
	24hrs_Jeko1_500U_IL2_don2_rep1_Experiment_WPRE_1-4C.fcs	2545	1473	622	1226	0.393959	63.34	66.342
	24hrs_Jeko1_500U_IL2_don2_rep1_Experiment_WPRE_2-1A.fcs	938	339	1859	3752	1.20566	73.4534	66.8687
	24hrs_Jeko1_500U_IL2_don2_rep1_Experiment_WPRE_2-1B.fcs	918	435	1808	3949	1.26896	67.8492	68.5948
	24hrs_Jeko1_500U_IL2_don2_rep1_Experiment_WPRE_2-1C.fcs	901	461	1790	3943	1.26703	66.1527	68.7773
	Sample:	Lymphocytes/Single Cells/dead cells/NALM6 cells | Count	Lymphocytes/Single Cells/Live cells/NALM6 cells | Count	Lymphocytes/Single Cells/dead cells/CAR-T cells | Count	Lymphocytes/Single Cells/Live cells/CAR-T cells | Count
	24hrs_Jeko1_500U_IL2_don2_rep1_Experiment_LTR_1-1A.fcs	1457	630	1520	3383	1.08708	69.8131	68.9986
	24hrs_Jeko1_500U_IL2_don2_rep1_Experiment_LTR_1-1B.fcs	1390	677	1494	3239	1.04081	67.2472	68.4344
	24hrs_Jeko1_500U_IL2_don2_rep1_Experiment_LTR_1-1C.fcs	1417	674	1418	3195	1.02667	67.7666	69.2608
	24hrs_Jeko1_500U_IL2_don2_rep1_Experiment_LTR_1-2A.fcs	1900	1002	1059	2158	0.693445	65.4721	67.0811
	24hrs_Jeko1_500U_IL2_don2_rep1_Experiment_LTR_1-2B.fcs	1857	1139	1042	2464	0.791774	61.9826	70.2795
	24hrs_Jeko1_500U_IL2_don2_rep1_Experiment_LTR_1-2C.fcs	1981	982	1061	2326	0.747429	66.8579	68.6743
	24hrs_Jeko1_500U_IL2_don2_rep1_Experiment_LTR_1-4A.fcs	2294	1567	571	1469	0.472044	59.4147	72.0098
	24hrs_Jeko1_500U_IL2_don2_rep1_Experiment_LTR_1-4B.fcs	2400	1451	744	1479	0.475257	62.3215	66.5317
	24hrs_Jeko1_500U_IL2_don2_rep1_Experiment_LTR_1-4C.fcs	2493	1377	601	1370	0.440231	64.4186	69.5079
	24hrs_Jeko1_500U_IL2_don2_rep1_Experiment_LTR_2-1A.fcs	853	342	1825	3569	1.14685	71.3808	66.1661
	24hrs_Jeko1_500U_IL2_don2_rep1_Experiment_LTR_2-1B.fcs	899	432	1783	3902	1.25386	67.5432	68.6368
	24hrs_Jeko1_500U_IL2_don2_rep1_Experiment_LTR_2-1C.fcs	830	457	1759	3949	1.26896	64.4911	69.1836
	Sample:	Lymphocytes/Single Cells/dead cells/NALM6 cells | Count	Lymphocytes/Single Cells/Live cells/NALM6 cells | Count	Lymphocytes/Single Cells/dead cells/CAR-T cells | Count	Lymphocytes/Single Cells/Live cells/CAR-T cells | Count
	24hrs_Jeko1_500U_IL2_don2_rep1_Experiment_TCRB_1-1A.fcs	1377	584	1617	3262	1.0482	70.2193	66.858
	24hrs_Jeko1_500U_IL2_don2_rep1_Experiment_TCRB_1-1B.fcs	1407	562	1528	3308	1.06298	71.4576	68.4036
	24hrs_Jeko1_500U_IL2_don2_rep1_Experiment_TCRB_1-1C.fcs	1412	562	1554	3220	1.0347	71.5299	67.4487
	24hrs_Jeko1_500U_IL2_don2_rep1_Experiment_TCRB_1-2A.fcs	1869	843	1249	2652	0.852185	68.9159	67.9826
	24hrs_Jeko1_500U_IL2_don2_rep1_Experiment_TCRB_1-2B.fcs	1772	833	1251	2746	0.882391	68.023	68.7015
	24hrs_Jeko1_500U_IL2_don2_rep1_Experiment_TCRB_1-2C.fcs	1882	775	1226	2699	0.867288	70.8318	68.7643
	24hrs_Jeko1_500U_IL2_don2_rep1_Experiment_TCRB_1-4A.fcs	2031	1066	982	2095	0.673201	65.5796	68.0858
	24hrs_Jeko1_500U_IL2_don2_rep1_Experiment_TCRB_1-4B.fcs	2223	1119	962	2011	0.646208	66.5171	67.6421
	24hrs_Jeko1_500U_IL2_don2_rep1_Experiment_TCRB_1-4C.fcs	2235	1071	840	1896	0.609254	67.6044	69.2982
	24hrs_Jeko1_500U_IL2_don2_rep1_Experiment_TCRB_2-1A.fcs	860	372	1979	3579	1.15006	69.8052	64.3937
	24hrs_Jeko1_500U_IL2_don2_rep1_Experiment_TCRB_2-1B.fcs	889	424	1932	3826	1.22943	67.7075	66.4467
	24hrs_Jeko1_500U_IL2_don2_rep1_Experiment_TCRB_2-1C.fcs	826	385	2000	3868	1.24293	68.2081	65.9168

## Sheet: J-48hrs
						Normalized live T cells	NALM6 dead %	CAR-T cells live %
	Sample:	Lymphocytes/Single Cells/dead cells/NALM6 cells | Count	Lymphocytes/Single Cells/Live cells/NALM6 cells | Count	Lymphocytes/Single Cells/dead cells/CAR-T cells | Count	Lymphocytes/Single Cells/Live cells/CAR-T cells | Count	(to 1:1 WPRE)
	48hrs_Jeko1_500U_IL2_don2_rep1_Experiment_Control_1-1A.fcs	2047	340	2163	5292	1.17522	85.7562	70.9859		CAR-T to B tumor ratio		Control			WPRE			LTR			TCRB
	48hrs_Jeko1_500U_IL2_don2_rep1_Experiment_Control_1-1B.fcs	2209	263	2088	5278	1.17211	89.3608	71.6535		_2-1	87.6682	85.571	86.6917	84.2211	79.8707	81.3703	84.3444	83.8768	82.8837	84.5781	86.8966	86.0301
	48hrs_Jeko1_500U_IL2_don2_rep1_Experiment_Control_1-1C.fcs	2115	272	2249	5225	1.16034	88.6049	69.909		_1-1	85.7562	89.3608	88.6049	83.1721	85.2077	86.9284	82.4508	81.322	86.5365	85.917	86.9149	86.5485
	48hrs_Jeko1_500U_IL2_don2_rep1_Experiment_Control_1-2A.fcs	3204	644	1543	4391	0.975128	83.264	73.9973		_1-2	83.264	82.6641	85.4603	89.0789	88.4388	89.688	88.4997	85.8302	88.0483	88.6681	86.446	89.2375
	48hrs_Jeko1_500U_IL2_don2_rep1_Experiment_Control_1-2B.fcs	3376	708	1383	4364	0.969132	82.6641	75.9353		_1-4	74.796	74.5366	79.6175	88.9368	90.0406	92.2501	88.7597	91.2113	93.1743	90.8403	91.9909	93.1281
	48hrs_Jeko1_500U_IL2_don2_rep1_Experiment_Control_1-2C.fcs	3221	548	1579	4525	1.00489	85.4603	74.1317
	48hrs_Jeko1_500U_IL2_don2_rep1_Experiment_Control_1-4A.fcs	3849	1297	1000	3596	0.798579	74.796	78.2419
	48hrs_Jeko1_500U_IL2_don2_rep1_Experiment_Control_1-4B.fcs	3981	1360	883	3475	0.771708	74.5366	79.7384		CAR-T to B tumor ratio		Cntrl T cells			WPRE T cells			LTR T cells			TCRB T cells
	48hrs_Jeko1_500U_IL2_don2_rep1_Experiment_Control_1-4C.fcs	4246	1087	977	3404	0.75594	79.6175	77.6992		_2-1	1.22807	1.24317	1.28825	1.18699	1.1861	1.24162	1.20631	1.20009	1.24495	1.17344	1.19654	1.23829
	48hrs_Jeko1_500U_IL2_don2_rep1_Experiment_Control_2-1A.fcs	1173	165	2883	5530	1.22807	87.6682	65.7316		_1-1	1.17522	1.17211	1.16034	1.04219	1.00822	0.949589	1.06085	1.0453	1.03398	1.04908	1.01332	1.02354
	48hrs_Jeko1_500U_IL2_don2_rep1_Experiment_Control_2-1B.fcs	1109	187	2908	5598	1.24317	85.571	65.8124		_1-2	0.975128	0.969132	1.00489	0.829891	0.813458	0.851654	0.843438	0.861426	0.854986	0.870087	0.924939	0.925605
	48hrs_Jeko1_500U_IL2_don2_rep1_Experiment_Control_2-1C.fcs	1153	177	2722	5801	1.28825	86.6917	68.0629		_1-4	0.798579	0.771708	0.75594	0.640906	0.642461	0.603598	0.630247	0.667555	0.643571	0.797913	0.757939	0.788807
	Sample:	Lymphocytes/Single Cells/dead cells/NALM6 cells | Count	Lymphocytes/Single Cells/Live cells/NALM6 cells | Count	Lymphocytes/Single Cells/dead cells/CAR-T cells | Count	Lymphocytes/Single Cells/Live cells/CAR-T cells | Count
	48hrs_Jeko1_500U_IL2_don2_rep1_Experiment_WPRE_1-1A.fcs	1720	348	2956	4693	1.04219	83.1721	61.3544
	48hrs_Jeko1_500U_IL2_don2_rep1_Experiment_WPRE_1-1B.fcs	1826	317	2987	4540	1.00822	85.2077	60.3162
	48hrs_Jeko1_500U_IL2_don2_rep1_Experiment_WPRE_1-1C.fcs	1749	263	3339	4276	0.949589	86.9284	56.1523
	48hrs_Jeko1_500U_IL2_don2_rep1_Experiment_WPRE_1-2A.fcs	2969	364	2576	3737	0.829891	89.0789	59.1953
	48hrs_Jeko1_500U_IL2_don2_rep1_Experiment_WPRE_1-2B.fcs	2991	391	2642	3663	0.813458	88.4388	58.0967
	48hrs_Jeko1_500U_IL2_don2_rep1_Experiment_WPRE_1-2C.fcs	3018	347	2443	3835	0.851654	89.688	61.0863
	48hrs_Jeko1_500U_IL2_don2_rep1_Experiment_WPRE_1-4A.fcs	4542	565	1714	2886	0.640906	88.9368	62.7391
	48hrs_Jeko1_500U_IL2_don2_rep1_Experiment_WPRE_1-4B.fcs	4656	515	1680	2893	0.642461	90.0406	63.2626
	48hrs_Jeko1_500U_IL2_don2_rep1_Experiment_WPRE_1-4C.fcs	4809	404	1766	2718	0.603598	92.2501	60.6155
	48hrs_Jeko1_500U_IL2_don2_rep1_Experiment_WPRE_2-1A.fcs	838	157	3346	5345	1.18699	84.2211	61.5004
	48hrs_Jeko1_500U_IL2_don2_rep1_Experiment_WPRE_2-1B.fcs	865	218	3278	5341	1.1861	79.8707	61.9677
	48hrs_Jeko1_500U_IL2_don2_rep1_Experiment_WPRE_2-1C.fcs	1057	242	2849	5591	1.24162	81.3703	66.2441
	Sample:	Lymphocytes/Single Cells/dead cells/NALM6 cells | Count	Lymphocytes/Single Cells/Live cells/NALM6 cells | Count	Lymphocytes/Single Cells/dead cells/CAR-T cells | Count	Lymphocytes/Single Cells/Live cells/CAR-T cells | Count
	48hrs_Jeko1_500U_IL2_don2_rep1_Experiment_LTR_1-1A.fcs	1635	348	2947	4777	1.06085	82.4508	61.8462
	48hrs_Jeko1_500U_IL2_don2_rep1_Experiment_LTR_1-1B.fcs	1624	373	3008	4707	1.0453	81.322	61.011
	48hrs_Jeko1_500U_IL2_don2_rep1_Experiment_LTR_1-1C.fcs	1684	262	3113	4656	1.03398	86.5365	59.9305
	48hrs_Jeko1_500U_IL2_don2_rep1_Experiment_LTR_1-2A.fcs	2855	371	2674	3798	0.843438	88.4997	58.6836
	48hrs_Jeko1_500U_IL2_don2_rep1_Experiment_LTR_1-2B.fcs	2750	454	2593	3879	0.861426	85.8302	59.9351
	48hrs_Jeko1_500U_IL2_don2_rep1_Experiment_LTR_1-2C.fcs	2991	406	2426	3850	0.854986	88.0483	61.3448
	48hrs_Jeko1_500U_IL2_don2_rep1_Experiment_LTR_1-4A.fcs	4809	609	1459	2838	0.630247	88.7597	66.0461
	48hrs_Jeko1_500U_IL2_don2_rep1_Experiment_LTR_1-4B.fcs	4473	431	1756	3006	0.667555	91.2113	63.1247
	48hrs_Jeko1_500U_IL2_don2_rep1_Experiment_LTR_1-4C.fcs	4764	349	1768	2898	0.643571	93.1743	62.1089
	48hrs_Jeko1_500U_IL2_don2_rep1_Experiment_LTR_2-1A.fcs	862	160	3279	5432	1.20631	84.3444	62.3579
	48hrs_Jeko1_500U_IL2_don2_rep1_Experiment_LTR_2-1B.fcs	926	178	3231	5404	1.20009	83.8768	62.5825
	48hrs_Jeko1_500U_IL2_don2_rep1_Experiment_LTR_2-1C.fcs	891	184	3064	5606	1.24495	82.8837	64.6597
	Sample:	Lymphocytes/Single Cells/dead cells/NALM6 cells | Count	Lymphocytes/Single Cells/Live cells/NALM6 cells | Count	Lymphocytes/Single Cells/dead cells/CAR-T cells | Count	Lymphocytes/Single Cells/Live cells/CAR-T cells | Count
	48hrs_Jeko1_500U_IL2_don2_rep1_Experiment_TCRB_1-1A.fcs	1635	268	3150	4724	1.04908	85.917	59.9949
	48hrs_Jeko1_500U_IL2_don2_rep1_Experiment_TCRB_1-1B.fcs	1634	246	3301	4563	1.01332	86.9149	58.0239
	48hrs_Jeko1_500U_IL2_don2_rep1_Experiment_TCRB_1-1C.fcs	1660	258	3228	4609	1.02354	86.5485	58.8108
	48hrs_Jeko1_500U_IL2_don2_rep1_Experiment_TCRB_1-2A.fcs	2543	325	2962	3918	0.870087	88.6681	56.9477
	48hrs_Jeko1_500U_IL2_don2_rep1_Experiment_TCRB_1-2B.fcs	2481	389	2695	4165	0.924939	86.446	60.7143
	48hrs_Jeko1_500U_IL2_don2_rep1_Experiment_TCRB_1-2C.fcs	2446	295	2763	4168	0.925605	89.2375	60.1356
	48hrs_Jeko1_500U_IL2_don2_rep1_Experiment_TCRB_1-4A.fcs	3481	351	2320	3593	0.797913	90.8403	60.7644
	48hrs_Jeko1_500U_IL2_don2_rep1_Experiment_TCRB_1-4B.fcs	3641	317	2349	3413	0.757939	91.9909	59.2329
	48hrs_Jeko1_500U_IL2_don2_rep1_Experiment_TCRB_1-4C.fcs	3781	279	2184	3552	0.788807	93.1281	61.9247
	48hrs_Jeko1_500U_IL2_don2_rep1_Experiment_TCRB_2-1A.fcs	872	159	3319	5284	1.17344	84.5781	61.4204
	48hrs_Jeko1_500U_IL2_don2_rep1_Experiment_TCRB_2-1B.fcs	882	133	3334	5388	1.19654	86.8966	61.7748
	48hrs_Jeko1_500U_IL2_don2_rep1_Experiment_TCRB_2-1C.fcs	973	158	3075	5576	1.23829	86.0301	64.455

## Sheet: J-72hrs
						Normalized live T cells	NALM6 dead %	CAR-T cells live %
	Sample:	Lymphocytes/Single Cells/dead cells/NALM6 cells | Count	Lymphocytes/Single Cells/Live cells/NALM6 cells | Count	Lymphocytes/Single Cells/dead cells/CAR-T cells | Count	Lymphocytes/Single Cells/Live cells/CAR-T cells | Count	(to 1:1 WPRE)
	72hrs_Jeko1_500U_IL2_don2_rep1_Experiment_Control_1-1A.fcs	1732	160	2646	5250	0.880626	91.5433	66.4894		CAR-T to B tumor ratio		Control			WPRE			LTR			TCRB
	72hrs_Jeko1_500U_IL2_don2_rep1_Experiment_Control_1-1B.fcs	1715	153	2556	5384	0.903103	91.8094	67.8086		_2-1	89.6247	91.1923	90.0498	82.1053	87.3668	84.9926	86.7596	88.647	89.3417	91.019	88.1057	87.4242
	72hrs_Jeko1_500U_IL2_don2_rep1_Experiment_Control_1-1C.fcs	1672	147	2842	5132	0.860833	91.9186	64.3592		_1-1	91.5433	91.8094	91.9186	81.0021	81.0526	80.2618	82.6609	84.1954	80.9045	84.919	86.2368	82.7686
	72hrs_Jeko1_500U_IL2_don2_rep1_Experiment_Control_1-2A.fcs	3072	256	2045	4409	0.739558	92.3077	68.3142		_1-2	92.3077	93.1516	92.6312	86.457	83.9923	80.8068	82.6855	85.1297	83.1782	84.375	82.7992	84.0503
	72hrs_Jeko1_500U_IL2_don2_rep1_Experiment_Control_1-2B.fcs	2870	211	2195	4559	0.764719	93.1516	67.5007		_1-4	91.2424	91.3088	92.0091	90.4232	89.4033	93.9978	90.0823	90.9125	92.938	87.5768	90.2616	91.2735
	72hrs_Jeko1_500U_IL2_don2_rep1_Experiment_Control_1-2C.fcs	2841	226	2202	4568	0.766229	92.6312	67.4742
	72hrs_Jeko1_500U_IL2_don2_rep1_Experiment_Control_1-4A.fcs	4480	430	1417	3564	0.597819	91.2424	71.5519
	72hrs_Jeko1_500U_IL2_don2_rep1_Experiment_Control_1-4B.fcs	4465	425	1311	3673	0.616103	91.3088	73.6958		CAR-T to B tumor ratio		Cntrl T cells			WPRE T cells			LTR T cells			TCRB T cells
	72hrs_Jeko1_500U_IL2_don2_rep1_Experiment_Control_1-4C.fcs	4433	385	1367	3684	0.617948	92.0091	72.9361		_2-1	1.01381	0.991334	1.00593	1.15823	1.12167	1.07906	1.09231	1.05776	1.06581	1.07906	1.04853	1.03914
	72hrs_Jeko1_500U_IL2_don2_rep1_Experiment_Control_2-1A.fcs	812	94	2739	6044	1.01381	89.6247	68.8148		_1-1	0.880626	0.903103	0.860833	1.03243	0.974224	0.993346	1.04786	0.970031	1.00123	1.00073	0.965502	0.967011
	72hrs_Jeko1_500U_IL2_don2_rep1_Experiment_Control_2-1B.fcs	849	82	2957	5910	0.991334	91.1923	66.6516		_1-2	0.739558	0.764719	0.766229	0.899245	0.916858	0.928432	0.909477	0.887	0.906961	0.895555	0.924741	0.923567
	72hrs_Jeko1_500U_IL2_don2_rep1_Experiment_Control_2-1C.fcs	905	100	2806	5997	1.00593	90.0498	68.1245		_1-4	0.597819	0.616103	0.617948	0.805312	0.780822	0.79357	0.787867	0.80397	0.798434	0.872239	0.848924	0.832485
	Sample:	Lymphocytes/Single Cells/dead cells/NALM6 cells | Count	Lymphocytes/Single Cells/Live cells/NALM6 cells | Count	Lymphocytes/Single Cells/dead cells/CAR-T cells | Count	Lymphocytes/Single Cells/Live cells/CAR-T cells | Count
	72hrs_Jeko1_500U_IL2_don2_rep1_Experiment_WPRE_1-1A.fcs	776	182	2591	6155	1.03243	81.0021	70.375
	72hrs_Jeko1_500U_IL2_don2_rep1_Experiment_WPRE_1-1B.fcs	847	198	2819	5808	0.974224	81.0526	67.3235
	72hrs_Jeko1_500U_IL2_don2_rep1_Experiment_WPRE_1-1C.fcs	797	196	2814	5922	0.993346	80.2618	67.7885
	72hrs_Jeko1_500U_IL2_don2_rep1_Experiment_WPRE_1-2A.fcs	1347	211	2639	5361	0.899245	86.457	67.0125
	72hrs_Jeko1_500U_IL2_don2_rep1_Experiment_WPRE_1-2B.fcs	1317	251	2601	5466	0.916858	83.9923	67.7575
	72hrs_Jeko1_500U_IL2_don2_rep1_Experiment_WPRE_1-2C.fcs	1242	295	2559	5535	0.928432	80.8068	68.384
	72hrs_Jeko1_500U_IL2_don2_rep1_Experiment_WPRE_1-4A.fcs	2436	258	2023	4801	0.805312	90.4232	70.3546
	72hrs_Jeko1_500U_IL2_don2_rep1_Experiment_WPRE_1-4B.fcs	2472	293	2101	4655	0.780822	89.4033	68.9017
	72hrs_Jeko1_500U_IL2_don2_rep1_Experiment_WPRE_1-4C.fcs	2537	162	2168	4731	0.79357	93.9978	68.5752
	72hrs_Jeko1_500U_IL2_don2_rep1_Experiment_WPRE_2-1A.fcs	468	102	2366	6905	1.15823	82.1053	74.4796
	72hrs_Jeko1_500U_IL2_don2_rep1_Experiment_WPRE_2-1B.fcs	574	83	2488	6687	1.12167	87.3668	72.8828
	72hrs_Jeko1_500U_IL2_don2_rep1_Experiment_WPRE_2-1C.fcs	572	101	2704	6433	1.07906	84.9926	70.406
	Sample:	Lymphocytes/Single Cells/dead cells/NALM6 cells | Count	Lymphocytes/Single Cells/Live cells/NALM6 cells | Count	Lymphocytes/Single Cells/dead cells/CAR-T cells | Count	Lymphocytes/Single Cells/Live cells/CAR-T cells | Count
	72hrs_Jeko1_500U_IL2_don2_rep1_Experiment_LTR_1-1A.fcs	758	159	2444	6247	1.04786	82.6609	71.879
	72hrs_Jeko1_500U_IL2_don2_rep1_Experiment_LTR_1-1B.fcs	879	165	2899	5783	0.970031	84.1954	66.6091
	72hrs_Jeko1_500U_IL2_don2_rep1_Experiment_LTR_1-1C.fcs	805	190	2700	5969	1.00123	80.9045	68.8545
	72hrs_Jeko1_500U_IL2_don2_rep1_Experiment_LTR_1-2A.fcs	1404	294	2590	5422	0.909477	82.6855	67.6735
	72hrs_Jeko1_500U_IL2_don2_rep1_Experiment_LTR_1-2B.fcs	1477	258	2613	5288	0.887	85.1297	66.9282
	72hrs_Jeko1_500U_IL2_don2_rep1_Experiment_LTR_1-2C.fcs	1340	271	2659	5407	0.906961	83.1782	67.0345
	72hrs_Jeko1_500U_IL2_don2_rep1_Experiment_LTR_1-4A.fcs	2516	277	2095	4697	0.787867	90.0823	69.1549
	72hrs_Jeko1_500U_IL2_don2_rep1_Experiment_LTR_1-4B.fcs	2401	240	2074	4793	0.80397	90.9125	69.7976
	72hrs_Jeko1_500U_IL2_don2_rep1_Experiment_LTR_1-4C.fcs	2382	181	2282	4760	0.798434	92.938	67.5944
	72hrs_Jeko1_500U_IL2_don2_rep1_Experiment_LTR_2-1A.fcs	498	76	2699	6512	1.09231	86.7596	70.6981
	72hrs_Jeko1_500U_IL2_don2_rep1_Experiment_LTR_2-1B.fcs	570	73	2847	6306	1.05776	88.647	68.8954
	72hrs_Jeko1_500U_IL2_don2_rep1_Experiment_LTR_2-1C.fcs	570	68	2837	6354	1.06581	89.3417	69.1328
	Sample:	Lymphocytes/Single Cells/dead cells/NALM6 cells | Count	Lymphocytes/Single Cells/Live cells/NALM6 cells | Count	Lymphocytes/Single Cells/dead cells/CAR-T cells | Count	Lymphocytes/Single Cells/Live cells/CAR-T cells | Count
	72hrs_Jeko1_500U_IL2_don2_rep1_Experiment_TCRB_1-1A.fcs	839	149	2832	5966	1.00073	84.919	67.8109
	72hrs_Jeko1_500U_IL2_don2_rep1_Experiment_TCRB_1-1B.fcs	896	143	3001	5756	0.965502	86.2368	65.7303
	72hrs_Jeko1_500U_IL2_don2_rep1_Experiment_TCRB_1-1C.fcs	855	178	2959	5765	0.967011	82.7686	66.0821
	72hrs_Jeko1_500U_IL2_don2_rep1_Experiment_TCRB_1-2A.fcs	1215	225	2903	5339	0.895555	84.375	64.778
	72hrs_Jeko1_500U_IL2_don2_rep1_Experiment_TCRB_1-2B.fcs	1266	263	2698	5513	0.924741	82.7992	67.1416
	72hrs_Jeko1_500U_IL2_don2_rep1_Experiment_TCRB_1-2C.fcs	1270	241	2664	5506	0.923567	84.0503	67.3929
	72hrs_Jeko1_500U_IL2_don2_rep1_Experiment_TCRB_1-4A.fcs	1854	263	2387	5200	0.872239	87.5768	68.5383
	72hrs_Jeko1_500U_IL2_don2_rep1_Experiment_TCRB_1-4B.fcs	1863	201	2463	5061	0.848924	90.2616	67.2648
	72hrs_Jeko1_500U_IL2_don2_rep1_Experiment_TCRB_1-4C.fcs	1799	172	2644	4963	0.832485	91.2735	65.2425
	72hrs_Jeko1_500U_IL2_don2_rep1_Experiment_TCRB_2-1A.fcs	527	52	2787	6433	1.07906	91.019	69.7722
	72hrs_Jeko1_500U_IL2_don2_rep1_Experiment_TCRB_2-1B.fcs	600	81	2875	6251	1.04853	88.1057	68.4966
	72hrs_Jeko1_500U_IL2_don2_rep1_Experiment_TCRB_2-1C.fcs	577	83	2942	6195	1.03914	87.4242	67.8012
