# Supplementary material for: Robust T cell activation requires an eIF3-driven burst in T cell receptor translation
Source: eLife journal article supplement (doi:10.7554/elife.74272), 2021-12-31
Supplement: supp [file DeSilva_Figure6-figure-supplement-2.xlsx]

## Sheet: N-24hrs
		NALM6	NALM6	T cells	T cells	Normalized live T cells	NALM6 dead %	CAR-T cells live %
	Sample:	dead cells	live cells	dead cells	live cells	(to 1:1 WPRE)
	24hrs_NALM6_50U_IL2_don1_day10_Experiment_Control_1-1A.fcs	1091	3777	894	10129	1.52331	22.4117	91.8897		CAR-T to B tumor ratio		Control			WPRE			LTR			TCRA			TCRB
	24hrs_NALM6_50U_IL2_don1_day10_Experiment_Control_1-1B.fcs	992	3673	837	10182	1.53128	21.2647	92.404		_2-1	22.7211	21.9791	21.9045	50.7651	47.6763	48.12	55.4804	57.8028	63.4298	81.337	78.8432	79.7987	76.4867	75.9281	75.448
	24hrs_NALM6_50U_IL2_don1_day10_Experiment_Control_1-1C.fcs	1012	3923	805	10170	1.52948	20.5066	92.6651		_1-1	22.4117	21.2647	20.5066	31.4179	39.2692	31.5996	34.4802	36.4443	34.1213	67.5283	53.9044	53.0147	55.6602	58.0333	58.9013
	24hrs_NALM6_50U_IL2_don1_day10_Experiment_Control_1-2A.fcs	1383	5429	579	7224	1.08642	20.3024	92.5798		_1-2	20.3024	22.2983	22.0035	32.7022	32.0879	33.3608	33.4375	30.9748	36.7843	40.2908	38.229	38.1388	40.0366	38.8185	42.1825
	24hrs_NALM6_50U_IL2_don1_day10_Experiment_Control_1-2B.fcs	1498	5220	672	7020	1.05574	22.2983	91.2637		_1-4	22.4288	23.5394	24.5184	29.8727	32.0935	34.0567	28.708	29.9978	35.5226	34.5565	35.5298	37.7802	35.4945	38.7928	38.6145
	24hrs_NALM6_50U_IL2_don1_day10_Experiment_Control_1-2C.fcs	1375	4874	575	7312	1.09966	22.0035	92.7095
	24hrs_NALM6_50U_IL2_don1_day10_Experiment_Control_1-4A.fcs	1930	6675	442	4215	0.633898	22.4288	90.5089
	24hrs_NALM6_50U_IL2_don1_day10_Experiment_Control_1-4B.fcs	1938	6295	362	4741	0.713004	23.5394	92.9061		CAR-T to B tumor ratio		Cntrl T cells			WPRE T cells			LTR T cells			TCRA T cells			TCRB T cells
	24hrs_NALM6_50U_IL2_don1_day10_Experiment_Control_1-4C.fcs	1960	6034	407	4575	0.688039	24.5184	91.8306		_2-1	1.95674	1.91523	1.93403	1.41683	1.42676	1.39247	1.43368	1.44827	1.29833	1.63024	1.56692	1.5594	1.72498	1.72604	1.6725
	24hrs_NALM6_50U_IL2_don1_day10_Experiment_Control_2-1A.fcs	668	2272	1003	13011	1.95674	22.7211	92.8429		_1-1	1.52331	1.53128	1.52948	1.09921	0.888661	1.01213	1.11395	1.07785	1.09921	1.35412	1.30705	1.29246	1.48977	1.42826	1.2896
	24hrs_NALM6_50U_IL2_don1_day10_Experiment_Control_2-1B.fcs	673	2389	1027	12735	1.91523	21.9791	92.5374		_1-2	1.08642	1.05574	1.09966	0.665029	0.601414	0.5963	0.669691	0.698115	0.622619	0.951524	0.904151	0.921596	1.11304	1.07981	1.06266
	24hrs_NALM6_50U_IL2_don1_day10_Experiment_Control_2-1C.fcs	697	2485	1064	12860	1.93403	21.9045	92.3585		_1-4	0.633898	0.713004	0.688039	0.394476	0.402597	0.415079	0.45388	0.472529	0.472679	0.589984	0.641418	0.641117	0.773912	0.808051	0.828203
	Sample:	dead cells	live cells	dead cells	live cells
	24hrs_NALM6_50U_IL2_don1_day10_Experiment_Juno_WPRE_1-1A.fcs	2094	4571	1164	7309	1.09921	31.4179	86.2622
	24hrs_NALM6_50U_IL2_don1_day10_Experiment_Juno_WPRE_1-1B.fcs	2977	4604	1173	5909	0.888661	39.2692	83.4369
	24hrs_NALM6_50U_IL2_don1_day10_Experiment_Juno_WPRE_1-1C.fcs	2260	4892	1111	6730	1.01213	31.5996	85.8309
	24hrs_NALM6_50U_IL2_don1_day10_Experiment_Juno_WPRE_1-2A.fcs	2936	6042	797	4422	0.665029	32.7022	84.7289
	24hrs_NALM6_50U_IL2_don1_day10_Experiment_Juno_WPRE_1-2B.fcs	2834	5998	776	3999	0.601414	32.0879	83.7487
	24hrs_NALM6_50U_IL2_don1_day10_Experiment_Juno_WPRE_1-2C.fcs	2831	5655	904	3965	0.5963	33.3608	81.4336
	24hrs_NALM6_50U_IL2_don1_day10_Experiment_Juno_WPRE_1-4A.fcs	2745	6444	441	2623	0.394476	29.8727	85.607
	24hrs_NALM6_50U_IL2_don1_day10_Experiment_Juno_WPRE_1-4B.fcs	3020	6390	476	2677	0.402597	32.0935	84.9033
	24hrs_NALM6_50U_IL2_don1_day10_Experiment_Juno_WPRE_1-4C.fcs	3186	6169	507	2760	0.415079	34.0567	84.4812
	24hrs_NALM6_50U_IL2_don1_day10_Experiment_Juno_WPRE_2-1A.fcs	2256	2188	1655	9421	1.41683	50.7651	85.0578
	24hrs_NALM6_50U_IL2_don1_day10_Experiment_Juno_WPRE_2-1B.fcs	2103	2308	1586	9487	1.42676	47.6763	85.6769
	24hrs_NALM6_50U_IL2_don1_day10_Experiment_Juno_WPRE_2-1C.fcs	2214	2387	1610	9259	1.39247	48.12	85.1872
	Sample:	dead cells	live cells	dead cells	live cells
	24hrs_NALM6_50U_IL2_don1_day10_Experiment_Juno-LTR_1-1A.fcs	2305	4380	1140	7407	1.11395	34.4802	86.662
	24hrs_NALM6_50U_IL2_don1_day10_Experiment_Juno-LTR_1-1B.fcs	2546	4440	1113	7167	1.07785	36.4443	86.558
	24hrs_NALM6_50U_IL2_don1_day10_Experiment_Juno-LTR_1-1C.fcs	2396	4626	1089	7309	1.09921	34.1213	87.0326
	24hrs_NALM6_50U_IL2_don1_day10_Experiment_Juno-LTR_1-2A.fcs	2996	5964	801	4453	0.669691	33.4375	84.7545
	24hrs_NALM6_50U_IL2_don1_day10_Experiment_Juno-LTR_1-2B.fcs	2596	5785	759	4642	0.698115	30.9748	85.947
	24hrs_NALM6_50U_IL2_don1_day10_Experiment_Juno-LTR_1-2C.fcs	3251	5587	829	4140	0.622619	36.7843	83.3166
	24hrs_NALM6_50U_IL2_don1_day10_Experiment_Juno-LTR_1-4A.fcs	2553	6340	462	3018	0.45388	28.708	86.7241
	24hrs_NALM6_50U_IL2_don1_day10_Experiment_Juno-LTR_1-4B.fcs	2755	6429	430	3142	0.472529	29.9978	87.9619
	24hrs_NALM6_50U_IL2_don1_day10_Experiment_Juno-LTR_1-4C.fcs	3229	5861	600	3143	0.472679	35.5226	83.9701
	24hrs_NALM6_50U_IL2_don1_day10_Experiment_Juno-LTR_2-1A.fcs	2460	1974	1596	9533	1.43368	55.4804	85.6591
	24hrs_NALM6_50U_IL2_don1_day10_Experiment_Juno-LTR_2-1B.fcs	2615	1909	1586	9630	1.44827	57.8028	85.8595
	24hrs_NALM6_50U_IL2_don1_day10_Experiment_Juno-LTR_2-1C.fcs	2959	1706	1672	8633	1.29833	63.4298	83.7749
	Sample:	dead cells	live cells	dead cells	live cells
	24hrs_NALM6_50U_IL2_don1_day10_Experiment_Juno-TCRA_1-1A.fcs	2926	1407	2217	9004	1.35412	67.5283	80.2424
	24hrs_NALM6_50U_IL2_don1_day10_Experiment_Juno-TCRA_1-1B.fcs	2706	2314	1930	8691	1.30705	53.9044	81.8285
	24hrs_NALM6_50U_IL2_don1_day10_Experiment_Juno-TCRA_1-1C.fcs	2673	2369	1930	8594	1.29246	53.0147	81.661
	24hrs_NALM6_50U_IL2_don1_day10_Experiment_Juno-TCRA_1-2A.fcs	2965	4394	1416	6327	0.951524	40.2908	81.7125
	24hrs_NALM6_50U_IL2_don1_day10_Experiment_Juno-TCRA_1-2B.fcs	2845	4597	1400	6012	0.904151	38.229	81.1117
	24hrs_NALM6_50U_IL2_don1_day10_Experiment_Juno-TCRA_1-2C.fcs	2836	4600	1359	6128	0.921596	38.1388	81.8485
	24hrs_NALM6_50U_IL2_don1_day10_Experiment_Juno-TCRA_1-4A.fcs	2957	5600	1004	3923	0.589984	34.5565	79.6225
	24hrs_NALM6_50U_IL2_don1_day10_Experiment_Juno-TCRA_1-4B.fcs	2971	5391	1023	4265	0.641418	35.5298	80.6543
	24hrs_NALM6_50U_IL2_don1_day10_Experiment_Juno-TCRA_1-4C.fcs	3101	5107	1136	4263	0.641117	37.7802	78.9591
	24hrs_NALM6_50U_IL2_don1_day10_Experiment_Juno-TCRA_2-1A.fcs	2044	469	2330	10840	1.63024	81.337	82.3083
	24hrs_NALM6_50U_IL2_don1_day10_Experiment_Juno-TCRA_2-1B.fcs	2072	556	2243	10419	1.56692	78.8432	82.2856
	24hrs_NALM6_50U_IL2_don1_day10_Experiment_Juno-TCRA_2-1C.fcs	2141	542	2337	10369	1.5594	79.7987	81.6071
	Sample:	dead cells	live cells	dead cells	live cells
	24hrs_NALM6_50U_IL2_don1_day10_Experiment_Juno_TCRB_1-1A.fcs	2483	1978	1710	9906	1.48977	55.6602	85.2789
	24hrs_NALM6_50U_IL2_don1_day10_Experiment_Juno_TCRB_1-1B.fcs	2821	2040	1622	9497	1.42826	58.0333	85.4124
	24hrs_NALM6_50U_IL2_don1_day10_Experiment_Juno_TCRB_1-1C.fcs	2316	1616	1475	8575	1.2896	58.9013	85.3234
	24hrs_NALM6_50U_IL2_don1_day10_Experiment_Juno_TCRB_1-2A.fcs	2628	3936	1267	7401	1.11304	40.0366	85.383
	24hrs_NALM6_50U_IL2_don1_day10_Experiment_Juno_TCRB_1-2B.fcs	2635	4153	1272	7180	1.07981	38.8185	84.9503
	24hrs_NALM6_50U_IL2_don1_day10_Experiment_Juno_TCRB_1-2C.fcs	2787	3820	1243	7066	1.06266	42.1825	85.0403
	24hrs_NALM6_50U_IL2_don1_day10_Experiment_Juno_TCRB_1-4A.fcs	2814	5114	887	5146	0.773912	35.4945	85.2975
	24hrs_NALM6_50U_IL2_don1_day10_Experiment_Juno_TCRB_1-4B.fcs	2982	4705	971	5373	0.808051	38.7928	84.6942
	24hrs_NALM6_50U_IL2_don1_day10_Experiment_Juno_TCRB_1-4C.fcs	2893	4599	933	5507	0.828203	38.6145	85.5124
	24hrs_NALM6_50U_IL2_don1_day10_Experiment_Juno_TCRB_2-1A.fcs	1955	601	1951	11470	1.72498	76.4867	85.4631
	24hrs_NALM6_50U_IL2_don1_day10_Experiment_Juno_TCRB_2-1B.fcs	1902	603	1938	11477	1.72604	75.9281	85.5535
	24hrs_NALM6_50U_IL2_don1_day10_Experiment_Juno_TCRB_2-1C.fcs	1979	644	2047	11121	1.6725	75.448	84.4547

## Sheet: N-48hrs
		NALM6	NALM6	T cells	T cells	Normalized live T cells	NALM6 dead %	CAR-T cells live %
	Sample:	dead cells	live cells	dead cells	live cells	(to 1:1 WPRE)
	48hrs_NALM6_50U_IL2_don1_day10_Experiment_Control_1-1A.fcs	1677	2286	998	11262	1.58754	42.3164	91.8597		CAR-T to B tumor ratio		Control			WPRE			LTR			TCRA			TCRB
	48hrs_NALM6_50U_IL2_don1_day10_Experiment_Control_1-1B.fcs	1526	2233	984	11564	1.63011	40.5959	92.1581		_2-1	49.302	48.8095	50.2013	80.574	81.5411	81.5691	82.3904	82.5766	82.1542	94.3609	95.3058	93.8485	92.4383	93.6548	94.2356
	48hrs_NALM6_50U_IL2_don1_day10_Experiment_Control_1-1C.fcs	1575	2223	995	11281	1.59022	41.4692	91.8948		_1-1	42.3164	40.5959	41.4692	60.2894	59.4857	61.0876	68.1485	61.6883	65.8706	87.9673	85.5358	88.4986	85.8467	87.9342	86.5723
	48hrs_NALM6_50U_IL2_don1_day10_Experiment_Control_1-2A.fcs	2444	3348	741	8137	1.14703	42.1961	91.6535		_1-2	42.1961	43.601	42.5154	61.3704	53.9463	55.4612	56.1165	56.8258	56.9961	69.8593	72.2799	67.1871	72.827	70.0798	71.2863
	48hrs_NALM6_50U_IL2_don1_day10_Experiment_Control_1-2B.fcs	2671	3455	789	7939	1.11911	43.601	90.9601		_1-4	45.2625	42.2586	44.4638	55.42	54.4251	55.9703	53.7743	57.0064	61.0074	57.8522	57.812	59.0172	64.4398	63.4539	65.7428
	48hrs_NALM6_50U_IL2_don1_day10_Experiment_Control_1-2C.fcs	2630	3556	698	8051	1.1349	42.5154	92.0219
	48hrs_NALM6_50U_IL2_don1_day10_Experiment_Control_1-4A.fcs	3664	4431	446	5276	0.743727	45.2625	92.2055
	48hrs_NALM6_50U_IL2_don1_day10_Experiment_Control_1-4B.fcs	2945	4024	460	5818	0.82013	42.2586	92.6728		CAR-T to B tumor ratio		Cntrl T cells			WPRE T cells			LTR T cells			TCRA T cells			TCRB T cells
	48hrs_NALM6_50U_IL2_don1_day10_Experiment_Control_1-4C.fcs	3313	4138	449	5701	0.803637	44.4638	92.6992		_2-1	1.87059	1.88709	1.89921	1.33211	1.32943	1.28151	1.3455	1.33268	1.33169	1.54906	1.50677	1.43741	1.47434	1.60699	1.58387
	48hrs_NALM6_50U_IL2_don1_day10_Experiment_Control_2-1A.fcs	1236	1271	1379	13270	1.87059	49.302	90.5864		_1-1	1.58754	1.63011	1.59022	1.04694	0.959543	0.993516	1.05949	1.10304	1.01762	1.21962	1.16169	1.16704	1.34776	1.29081	1.29546
	48hrs_NALM6_50U_IL2_don1_day10_Experiment_Control_2-1B.fcs	1189	1247	1386	13387	1.88709	48.8095	90.618		_1-2	1.14703	1.11911	1.1349	0.766563	0.79095	0.716803	0.698337	0.730899	0.768255	0.961799	0.984353	0.956865	1.03919	1.00775	1.06597
	48hrs_NALM6_50U_IL2_don1_day10_Experiment_Control_2-1C.fcs	1247	1237	1350	13473	1.89921	50.2013	90.8925		_1-4	0.743727	0.82013	0.803637	0.466732	0.445447	0.489287	0.509445	0.48252	0.507612	0.728644	0.679588	0.727939	0.77629	0.739216	0.571469
	Sample:	dead cells	live cells	dead cells	live cells
	48hrs_NALM6_50U_IL2_don1_day10_Experiment_Juno_WPRE_1-1A.fcs	2458	1619	2195	7427	1.04694	60.2894	77.1877
	48hrs_NALM6_50U_IL2_don1_day10_Experiment_Juno_WPRE_1-1B.fcs	2637	1796	2083	6807	0.959543	59.4857	76.5692
	48hrs_NALM6_50U_IL2_don1_day10_Experiment_Juno_WPRE_1-1C.fcs	2741	1746	1996	7048	0.993516	61.0876	77.9301
	48hrs_NALM6_50U_IL2_don1_day10_Experiment_Juno_WPRE_1-2A.fcs	3735	2351	2159	5438	0.766563	61.3704	71.5809
	48hrs_NALM6_50U_IL2_don1_day10_Experiment_Juno_WPRE_1-2B.fcs	3397	2900	1531	5611	0.79095	53.9463	78.5634
	48hrs_NALM6_50U_IL2_don1_day10_Experiment_Juno_WPRE_1-2C.fcs	3788	3042	1542	5085	0.716803	55.4612	76.7316
	48hrs_NALM6_50U_IL2_don1_day10_Experiment_Juno_WPRE_1-4A.fcs	4862	3911	939	3311	0.466732	55.42	77.9059
	48hrs_NALM6_50U_IL2_don1_day10_Experiment_Juno_WPRE_1-4B.fcs	4686	3924	769	3160	0.445447	54.4251	80.4276
	48hrs_NALM6_50U_IL2_don1_day10_Experiment_Juno_WPRE_1-4C.fcs	4753	3739	938	3471	0.489287	55.9703	78.7253
	48hrs_NALM6_50U_IL2_don1_day10_Experiment_Juno_WPRE_2-1A.fcs	1937	467	2575	9450	1.33211	80.574	78.5863
	48hrs_NALM6_50U_IL2_don1_day10_Experiment_Juno_WPRE_2-1B.fcs	1926	436	2562	9431	1.32943	81.5411	78.6375
	48hrs_NALM6_50U_IL2_don1_day10_Experiment_Juno_WPRE_2-1C.fcs	1965	444	2664	9091	1.28151	81.5691	77.3373
	Sample:	dead cells	live cells	dead cells	live cells
	48hrs_NALM6_50U_IL2_don1_day10_Experiment_Juno-LTR_1-1A.fcs	3158	1476	2145	7516	1.05949	68.1485	77.7973
	48hrs_NALM6_50U_IL2_don1_day10_Experiment_Juno-LTR_1-1B.fcs	2755	1711	1964	7825	1.10304	61.6883	79.9367
	48hrs_NALM6_50U_IL2_don1_day10_Experiment_Juno-LTR_1-1C.fcs	3227	1672	1995	7219	1.01762	65.8706	78.3482
	48hrs_NALM6_50U_IL2_don1_day10_Experiment_Juno-LTR_1-2A.fcs	3968	3103	1426	4954	0.698337	56.1165	77.6489
	48hrs_NALM6_50U_IL2_don1_day10_Experiment_Juno-LTR_1-2B.fcs	3917	2976	1585	5185	0.730899	56.8258	76.5879
	48hrs_NALM6_50U_IL2_don1_day10_Experiment_Juno-LTR_1-2C.fcs	3829	2889	1611	5450	0.768255	56.9961	77.1845
	48hrs_NALM6_50U_IL2_don1_day10_Experiment_Juno-LTR_1-4A.fcs	4723	4060	961	3614	0.509445	53.7743	78.9945
	48hrs_NALM6_50U_IL2_don1_day10_Experiment_Juno-LTR_1-4B.fcs	4894	3691	853	3423	0.48252	57.0064	80.0514
	48hrs_NALM6_50U_IL2_don1_day10_Experiment_Juno-LTR_1-4C.fcs	5293	3383	874	3601	0.507612	61.0074	80.4693
	48hrs_NALM6_50U_IL2_don1_day10_Experiment_Juno-LTR_2-1A.fcs	2199	470	2745	9545	1.3455	82.3904	77.6648
	48hrs_NALM6_50U_IL2_don1_day10_Experiment_Juno-LTR_2-1B.fcs	2237	472	2597	9454	1.33268	82.5766	78.4499
	48hrs_NALM6_50U_IL2_don1_day10_Experiment_Juno-LTR_2-1C.fcs	2067	449	2558	9447	1.33169	82.1542	78.6922
	Sample:	dead cells	live cells	dead cells	live cells
	48hrs_NALM6_50U_IL2_don1_day10_Experiment_Juno-TCRA_1-1A.fcs	2259	309	2922	8652	1.21962	87.9673	74.7538
	48hrs_NALM6_50U_IL2_don1_day10_Experiment_Juno-TCRA_1-1B.fcs	2259	382	2856	8241	1.16169	85.5358	74.2633
	48hrs_NALM6_50U_IL2_don1_day10_Experiment_Juno-TCRA_1-1C.fcs	2570	334	2786	8279	1.16704	88.4986	74.8215
	48hrs_NALM6_50U_IL2_don1_day10_Experiment_Juno-TCRA_1-2A.fcs	2830	1221	2613	6823	0.961799	69.8593	72.3082
	48hrs_NALM6_50U_IL2_don1_day10_Experiment_Juno-TCRA_1-2B.fcs	2923	1121	2633	6983	0.984353	72.2799	72.6186
	48hrs_NALM6_50U_IL2_don1_day10_Experiment_Juno-TCRA_1-2C.fcs	2625	1282	2620	6788	0.956865	67.1871	72.1514
	48hrs_NALM6_50U_IL2_don1_day10_Experiment_Juno-TCRA_1-4A.fcs	3367	2453	2046	5169	0.728644	57.8522	71.6424
	48hrs_NALM6_50U_IL2_don1_day10_Experiment_Juno-TCRA_1-4B.fcs	3641	2657	1589	4821	0.679588	57.812	75.2106
	48hrs_NALM6_50U_IL2_don1_day10_Experiment_Juno-TCRA_1-4C.fcs	3459	2402	1919	5164	0.727939	59.0172	72.907
	48hrs_NALM6_50U_IL2_don1_day10_Experiment_Juno-TCRA_2-1A.fcs	1255	75	2817	10989	1.54906	94.3609	79.5958
	48hrs_NALM6_50U_IL2_don1_day10_Experiment_Juno-TCRA_2-1B.fcs	1340	66	2806	10689	1.50677	95.3058	79.2071
	48hrs_NALM6_50U_IL2_don1_day10_Experiment_Juno-TCRA_2-1C.fcs	1251	82	3060	10197	1.43741	93.8485	76.9179
	Sample:	dead cells	live cells	dead cells	live cells
	48hrs_NALM6_50U_IL2_don1_day10_Experiment_Juno_TCRB_1-1A.fcs	2408	397	2575	9561	1.34776	85.8467	78.7821
	48hrs_NALM6_50U_IL2_don1_day10_Experiment_Juno_TCRB_1-1C.fcs	2835	389	2446	9157	1.29081	87.9342	78.9192
	48hrs_NALM6_50U_IL2_don1_day10_Experiment_Juno_TCRB_1-1B.fcs	2508	389	2335	9190	1.29546	86.5723	79.7397
	48hrs_NALM6_50U_IL2_don1_day10_Experiment_Juno_TCRB_1-2B.fcs	3385	1263	2277	7372	1.03919	72.827	76.4017
	48hrs_NALM6_50U_IL2_don1_day10_Experiment_Juno_TCRB_1-2A.fcs	3251	1388	2259	7149	1.00775	70.0798	75.9885
	48hrs_NALM6_50U_IL2_don1_day10_Experiment_Juno_TCRB_1-2C.fcs	3220	1297	2254	7562	1.06597	71.2863	77.0375
	48hrs_NALM6_50U_IL2_don1_day10_Experiment_Juno_TCRB_1-4C.fcs	4273	2358	1565	5507	0.77629	64.4398	77.8705
	48hrs_NALM6_50U_IL2_don1_day10_Experiment_Juno_TCRB_1-4B.fcs	4332	2495	1436	5244	0.739216	63.4539	78.503
	48hrs_NALM6_50U_IL2_don1_day10_Experiment_Juno_TCRB_1-4A.fcs	3226	1681	1225	4054	0.571469	65.7428	76.7948
	48hrs_NALM6_50U_IL2_don1_day10_Experiment_Juno_TCRB_2-1A.fcs	1198	98	2234	10459	1.47434	92.4383	82.3997
	48hrs_NALM6_50U_IL2_don1_day10_Experiment_Juno_TCRB_2-1B.fcs	1476	100	2511	11400	1.60699	93.6548	81.9495
	48hrs_NALM6_50U_IL2_don1_day10_Experiment_Juno_TCRB_2-1C.fcs	1504	92	2562	11236	1.58387	94.2356	81.4321

## Sheet: N-72hrs
		NALM6	NALM6	T cells	T cells	Normalized live T cells	NALM6 dead %	CAR-T cells live %
	Sample:	dead cells	live cells	dead cells	live cells	(to 1:1 WPRE)
	72hrs_NALM6_50U_IL2_don1_day10(1)_Experiment_Control_1-1A.fcs	1902	1973	1280	11159	1.22179	49.0839	89.7098		CAR-T to B tumor ratio		Control			WPRE			LTR			TCRA			TCRB
	72hrs_NALM6_50U_IL2_don1_day10(1)_Experiment_Control_1-1B.fcs	2038	1758	1164	10495	1.14909	53.6881	90.0163		_2-1	65.6125	62.5	59.4051	90.4494	90.625	89.4817	91.2608	90.5989	88.1128	95.189	96.4824	94.3617	94.2308	95.0772	96.3788
	72hrs_NALM6_50U_IL2_don1_day10(1)_Experiment_Control_1-1C.fcs	2068	2070	1285	10921	1.19573	49.9758	89.4724		_1-1	49.0839	53.6881	49.9758	81.6295	79.7438	79.5262	84.1406	80.7256	83.4909	93.6186	93.6635	92.2571	93.5145	94.8662	93.7031
	72hrs_NALM6_50U_IL2_don1_day10(1)_Experiment_Control_1-2A.fcs	2501	3540	824	8411	0.920912	41.4004	91.0774		_1-2	41.4004	45.7084	44.8528	71.3125	75.6098	75.796	75.1281	76.472	75.901	86.5174	88.1347	89.1051	87.6645	89.0549	89.497
	72hrs_NALM6_50U_IL2_don1_day10(1)_Experiment_Control_1-2B.fcs	2881	3422	773	8166	0.894088	45.7084	91.3525		_1-4	45.2802	43.5453	46.1758	72.5064	72.6388	74.4541	75.2085	72.5949	76.4378	78.2157	79.2773	82.9916	84.042	84.9639	83.5456
	72hrs_NALM6_50U_IL2_don1_day10(1)_Experiment_Control_1-2C.fcs	2758	3391	816	8073	0.883905	44.8528	90.8201
	72hrs_NALM6_50U_IL2_don1_day10(1)_Experiment_Control_1-4A.fcs	3991	4823	522	5031	0.550839	45.2802	90.5997
	72hrs_NALM6_50U_IL2_don1_day10(1)_Experiment_Control_1-4B.fcs	3842	4981	539	5001	0.547555	43.5453	90.2708		CAR-T to B tumor ratio		Cntrl T cells			WPRE T cells			LTR T cells			TCRA T cells			TCRB T cells
	72hrs_NALM6_50U_IL2_don1_day10(1)_Experiment_Control_1-4C.fcs	3725	4342	515	5314	0.581825	46.1758	91.1649		_2-1	1.4354	1.40989	1.42062	1.19223	1.21292	1.18095	1.19726	1.11909	1.15029	1.16836	1.18861	1.16726	1.31518	1.34989	1.29854
	72hrs_NALM6_50U_IL2_don1_day10(1)_Experiment_Control_2-1A.fcs	1473	772	1717	13110	1.4354	65.6125	88.4198		_1-1	1.22179	1.14909	1.19573	1.0731	1.03467	0.892226	1.00883	0.971277	0.993394	1.1262	1.1077	1.10847	1.15664	1.14328	1.13661
	72hrs_NALM6_50U_IL2_don1_day10(1)_Experiment_Control_2-1B.fcs	1505	903	1713	12877	1.40989	62.5	88.2591		_1-2	0.920912	0.894088	0.883905	0.811861	0.818321	0.854453	0.714854	0.747372	0.719453	0.99865	0.994818	0.959124	0.95135	0.938102	0.948723
	72hrs_NALM6_50U_IL2_don1_day10(1)_Experiment_Control_2-1C.fcs	1478	1010	1638	12975	1.42062	59.4051	88.7908		_1-4	0.550839	0.547555	0.581825	0.648942	0.596277	0.571752	0.57219	0.543066	0.547226	0.808358	0.812737	0.819416	0.809015	0.728431	0.753832
	Sample:	dead cells	live cells	dead cells	live cells
	72hrs_NALM6_50U_IL2_don1_day10(1)_Experiment_Juno_WPRE_1-1A.fcs	1573	354	2661	9801	1.0731	81.6295	78.6471
	72hrs_NALM6_50U_IL2_don1_day10(1)_Experiment_Juno_WPRE_1-1B.fcs	1681	427	2741	9450	1.03467	79.7438	77.5162
	72hrs_NALM6_50U_IL2_don1_day10(1)_Experiment_Juno_WPRE_1-1C.fcs	1410	363	2137	8149	0.892226	79.5262	79.2242
	72hrs_NALM6_50U_IL2_don1_day10(1)_Experiment_Juno_WPRE_1-2A.fcs	2369	953	2443	7415	0.811861	71.3125	75.2181
	72hrs_NALM6_50U_IL2_don1_day10(1)_Experiment_Juno_WPRE_1-2B.fcs	2480	800	2567	7474	0.818321	75.6098	74.4348
	72hrs_NALM6_50U_IL2_don1_day10(1)_Experiment_Juno_WPRE_1-2C.fcs	2452	783	2334	7804	0.854453	75.796	76.9777
	72hrs_NALM6_50U_IL2_don1_day10(1)_Experiment_Juno_WPRE_1-4A.fcs	3402	1290	1898	5927	0.648942	72.5064	75.7444
	72hrs_NALM6_50U_IL2_don1_day10(1)_Experiment_Juno_WPRE_1-4B.fcs	3584	1350	1652	5446	0.596277	72.6388	76.7258
	72hrs_NALM6_50U_IL2_don1_day10(1)_Experiment_Juno_WPRE_1-4C.fcs	3955	1357	1658	5222	0.571752	74.4541	75.9012
	72hrs_NALM6_50U_IL2_don1_day10(1)_Experiment_Juno_WPRE_2-1A.fcs	1127	119	3021	10889	1.19223	90.4494	78.2818
	72hrs_NALM6_50U_IL2_don1_day10(1)_Experiment_Juno_WPRE_2-1B.fcs	1131	117	2904	11078	1.21292	90.625	79.2304
	72hrs_NALM6_50U_IL2_don1_day10(1)_Experiment_Juno_WPRE_2-1C.fcs	1174	138	2970	10786	1.18095	89.4817	78.4094
	Sample:	dead cells	live cells	dead cells	live cells
	72hrs_NALM6_50U_IL2_don1_day10(1)_Experiment_Juno-LTR_1-1A.fcs	2154	406	2962	9214	1.00883	84.1406	75.6735
	72hrs_NALM6_50U_IL2_don1_day10(1)_Experiment_Juno-LTR_1-1B.fcs	2136	510	2811	8871	0.971277	80.7256	75.9373
	72hrs_NALM6_50U_IL2_don1_day10(1)_Experiment_Juno-LTR_1-1C.fcs	2119	419	2616	9073	0.993394	83.4909	77.62
	72hrs_NALM6_50U_IL2_don1_day10(1)_Experiment_Juno-LTR_1-2A.fcs	3078	1019	2406	6529	0.714854	75.1281	73.0722
	72hrs_NALM6_50U_IL2_don1_day10(1)_Experiment_Juno-LTR_1-2B.fcs	3091	951	2460	6826	0.747372	76.472	73.5085
	72hrs_NALM6_50U_IL2_don1_day10(1)_Experiment_Juno-LTR_1-2C.fcs	3096	983	2528	6571	0.719453	75.901	72.2167
	72hrs_NALM6_50U_IL2_don1_day10(1)_Experiment_Juno-LTR_1-4A.fcs	4329	1427	1904	5226	0.57219	75.2085	73.2959
	72hrs_NALM6_50U_IL2_don1_day10(1)_Experiment_Juno-LTR_1-4B.fcs	4339	1638	1706	4960	0.543066	72.5949	74.4074
	72hrs_NALM6_50U_IL2_don1_day10(1)_Experiment_Juno-LTR_1-4C.fcs	4665	1438	1618	4998	0.547226	76.4378	75.5441
	72hrs_NALM6_50U_IL2_don1_day10(1)_Experiment_Juno-LTR_2-1A.fcs	1368	131	2876	10935	1.19726	91.2608	79.176
	72hrs_NALM6_50U_IL2_don1_day10(1)_Experiment_Juno-LTR_2-1B.fcs	1195	124	2472	10221	1.11909	90.5989	80.5247
	72hrs_NALM6_50U_IL2_don1_day10(1)_Experiment_Juno-LTR_2-1C.fcs	1312	177	3066	10506	1.15029	88.1128	77.4094
	Sample:	dead cells	live cells	dead cells	live cells
	72hrs_NALM6_50U_IL2_don1_day10(1)_Experiment_Juno-TCRA_1-1A.fcs	1291	88	3426	10286	1.1262	93.6186	75.0146
	72hrs_NALM6_50U_IL2_don1_day10(1)_Experiment_Juno-TCRA_1-1B.fcs	1286	87	3377	10117	1.1077	93.6635	74.9741
	72hrs_NALM6_50U_IL2_don1_day10(1)_Experiment_Juno-TCRA_1-1C.fcs	1263	106	3479	10124	1.10847	92.2571	74.4248
	72hrs_NALM6_50U_IL2_don1_day10(1)_Experiment_Juno-TCRA_1-2A.fcs	1816	283	3367	9121	0.99865	86.5174	73.0381
	72hrs_NALM6_50U_IL2_don1_day10(1)_Experiment_Juno-TCRA_1-2B.fcs	1701	229	3407	9086	0.994818	88.1347	72.7287
	72hrs_NALM6_50U_IL2_don1_day10(1)_Experiment_Juno-TCRA_1-2C.fcs	1832	224	3397	8760	0.959124	89.1051	72.0573
	72hrs_NALM6_50U_IL2_don1_day10(1)_Experiment_Juno-TCRA_1-4A.fcs	2183	608	2850	7383	0.808358	78.2157	72.1489
	72hrs_NALM6_50U_IL2_don1_day10(1)_Experiment_Juno-TCRA_1-4B.fcs	2567	671	2635	7423	0.812737	79.2773	73.8019
	72hrs_NALM6_50U_IL2_don1_day10(1)_Experiment_Juno-TCRA_1-4C.fcs	2874	589	2582	7484	0.819416	82.9916	74.3493
	72hrs_NALM6_50U_IL2_don1_day10(1)_Experiment_Juno-TCRA_2-1A.fcs	831	42	3902	10671	1.16836	95.189	73.2245
	72hrs_NALM6_50U_IL2_don1_day10(1)_Experiment_Juno-TCRA_2-1B.fcs	960	35	3690	10856	1.18861	96.4824	74.6322
	72hrs_NALM6_50U_IL2_don1_day10(1)_Experiment_Juno-TCRA_2-1C.fcs	887	53	3503	10661	1.16726	94.3617	75.2683
	Sample:	dead cells	live cells	dead cells	live cells
	72hrs_NALM6_50U_IL2_don1_day10(1)_Experiment_Juno_TCRB_1-1A.fcs	1514	105	2869	10564	1.15664	93.5145	78.6421
	72hrs_NALM6_50U_IL2_don1_day10(1)_Experiment_Juno_TCRB_1-1B.fcs	1737	94	3017	10442	1.14328	94.8662	77.5838
	72hrs_NALM6_50U_IL2_don1_day10(1)_Experiment_Juno_TCRB_1-1C.fcs	1622	109	2966	10381	1.13661	93.7031	77.7778
	72hrs_NALM6_50U_IL2_don1_day10(1)_Experiment_Juno_TCRB_1-2A.fcs	2331	328	2955	8689	0.95135	87.6645	74.6221
	72hrs_NALM6_50U_IL2_don1_day10(1)_Experiment_Juno_TCRB_1-2B.fcs	2384	293	2990	8568	0.938102	89.0549	74.1305
	72hrs_NALM6_50U_IL2_don1_day10(1)_Experiment_Juno_TCRB_1-2C.fcs	2420	284	2946	8665	0.948723	89.497	74.6275
	72hrs_NALM6_50U_IL2_don1_day10(1)_Experiment_Juno_TCRB_1-4A.fcs	3281	623	2424	7389	0.809015	84.042	75.2981
	72hrs_NALM6_50U_IL2_don1_day10(1)_Experiment_Juno_TCRB_1-4B.fcs	3769	667	2099	6653	0.728431	84.9639	76.0169
	72hrs_NALM6_50U_IL2_don1_day10(1)_Experiment_Juno_TCRB_1-4C.fcs	3346	659	2313	6885	0.753832	83.5456	74.8532
	72hrs_NALM6_50U_IL2_don1_day10(1)_Experiment_Juno_TCRB_2-1A.fcs	931	57	2761	12012	1.31518	94.2308	81.3105
	72hrs_NALM6_50U_IL2_don1_day10(1)_Experiment_Juno_TCRB_2-1B.fcs	985	51	2698	12329	1.34989	95.0772	82.0457
	72hrs_NALM6_50U_IL2_don1_day10(1)_Experiment_Juno_TCRB_2-1C.fcs	1038	39	2848	11860	1.29854	96.3788	80.6364

## Sheet: J-24hrs
		Jeko1	Jeko1	T cells	T cells	Normalized live T cells	Jeko1 dead %	CAR-T cells live %
	Sample:	dead cells	live cells	dead cells	live cells	(to 1:1 WPRE)
	24hrs_Jeko1_50U_IL2_don1_day_10_Experiment_Control_1-1A.fcs	496	6168	737	8770	1.42201	7.44298	92.2478		CAR-T to B tumor ratio		Control			WPRE			LTR			TCRA			TCRB
	24hrs_Jeko1_50U_IL2_don1_day_10_Experiment_Control_1-1B.fcs	394	6242	660	8685	1.40823	5.93731	92.9374		_2-1	10.1877	10.7584	9.02537	29.2561	30.4614	27.309	30.8666	30.4016	28.1536	42.014	40.2794	39.1195	43.4942	39.8753	38.1944
	24hrs_Jeko1_50U_IL2_don1_day_10_Experiment_Control_1-1C.fcs	560	6254	669	8774	1.42266	8.21837	92.9154		_1-1	7.44298	5.93731	8.21837	29.9021	28.1834	32.8521	30.6814	27.5469	30.2376	32.5604	30.9211	35.9245	36.8539	30.2335	37.1153
	24hrs_Jeko1_50U_IL2_don1_day_10_Experiment_Control_1-2A.fcs	514	9112	465	5540	0.898281	5.3397	92.2565		_1-2	5.3397	6.44311	5.96354	27.0616	34.2817	27.9484	22.9962	27.886	23.8855	34.3426	38.494	37.5135	31.5686	48.6561	36.5767
	24hrs_Jeko1_50U_IL2_don1_day_10_Experiment_Control_1-2B.fcs	611	8872	571	5759	0.933791	6.44311	90.9795		_1-4	5.84304	5.22898	7.5567	25.9022	26.2399	33.2623	21.3182	22.5648	28.0974	41.1603	38.5259	49.625	38.0455	37.0288	49.267
	24hrs_Jeko1_50U_IL2_don1_day_10_Experiment_Control_1-2C.fcs	579	9130	474	5528	0.896336	5.96354	92.1026
	24hrs_Jeko1_50U_IL2_don1_day_10_Experiment_Control_1-4A.fcs	682	10990	430	3329	0.539779	5.84304	88.5608
	24hrs_Jeko1_50U_IL2_don1_day_10_Experiment_Control_1-4B.fcs	620	11237	408	3423	0.555021	5.22898	89.35		CAR-T to B tumor ratio		Cntrl T cells			WPRE T cells			LTR T cells			TCRA T cells			TCRB T cells
	24hrs_Jeko1_50U_IL2_don1_day_10_Experiment_Control_1-4C.fcs	853	10435	496	3740	0.606421	7.5567	88.2908		_2-1	2.01351	2.01384	2.03102	1.53146	1.56697	1.51022	1.5133	1.57605	1.5274	1.66133	1.65323	1.56632	1.82607	1.80645	1.74403
	24hrs_Jeko1_50U_IL2_don1_day_10_Experiment_Control_2-1A.fcs	407	3588	789	12418	2.01351	10.1877	94.0259		_1-1	1.42201	1.40823	1.42266	1.02702	0.974165	0.998811	1.04162	1.01065	1.04972	1.51297	1.41147	1.45914	1.5154	1.56729	1.5707
	24hrs_Jeko1_50U_IL2_don1_day_10_Experiment_Control_2-1B.fcs	427	3542	908	12420	2.01384	10.7584	93.1873		_1-2	0.898281	0.933791	0.896336	0.511404	0.523889	0.494865	0.626689	0.613393	0.58518	1.0494	1.03902	1.00886	1.17668	1.00351	1.08005
	24hrs_Jeko1_50U_IL2_don1_day_10_Experiment_Control_2-1C.fcs	338	3407	927	12526	2.03102	9.02537	93.1093		_1-4	0.539779	0.555021	0.606421	0.30321	0.305318	0.318938	0.348125	0.337585	0.334504	0.597827	0.61615	0.635283	0.675008	0.694141	0.683764
	Sample:	dead cells	live cells	dead cells	live cells
	24hrs_Jeko1_50U_IL2_don1_day_10_Experiment_Juno_WPRE_1-1A.fcs	2260	5298	963	6334	1.02702	29.9021	86.8028
	24hrs_Jeko1_50U_IL2_don1_day_10_Experiment_Juno_WPRE_1-1B.fcs	2127	5420	967	6008	0.974165	28.1834	86.1362
	24hrs_Jeko1_50U_IL2_don1_day_10_Experiment_Juno_WPRE_1-1C.fcs	2503	5116	1049	6160	0.998811	32.8521	85.4487
	24hrs_Jeko1_50U_IL2_don1_day_10_Experiment_Juno_WPRE_1-2A.fcs	2704	7288	770	3154	0.511404	27.0616	80.3772
	24hrs_Jeko1_50U_IL2_don1_day_10_Experiment_Juno_WPRE_1-2B.fcs	3374	6468	733	3231	0.523889	34.2817	81.5086
	24hrs_Jeko1_50U_IL2_don1_day_10_Experiment_Juno_WPRE_1-2C.fcs	2794	7203	647	3052	0.494865	27.9484	82.5088
	24hrs_Jeko1_50U_IL2_don1_day_10_Experiment_Juno_WPRE_1-4A.fcs	3036	8685	384	1870	0.30321	25.9022	82.9636
	24hrs_Jeko1_50U_IL2_don1_day_10_Experiment_Juno_WPRE_1-4B.fcs	3074	8641	393	1883	0.305318	26.2399	82.7329
	24hrs_Jeko1_50U_IL2_don1_day_10_Experiment_Juno_WPRE_1-4C.fcs	3748	7520	465	1967	0.318938	33.2623	80.8799
	24hrs_Jeko1_50U_IL2_don1_day_10_Experiment_Juno_WPRE_2-1A.fcs	1581	3823	1393	9445	1.53146	29.2561	87.1471
	24hrs_Jeko1_50U_IL2_don1_day_10_Experiment_Juno_WPRE_2-1B.fcs	1545	3527	1465	9664	1.56697	30.4614	86.8362
	24hrs_Jeko1_50U_IL2_don1_day_10_Experiment_Juno_WPRE_2-1C.fcs	1437	3825	1374	9314	1.51022	27.309	87.1445
	Sample:	dead cells	live cells	dead cells	live cells
	24hrs_Jeko1_50U_IL2_don1_day_10_Experiment_Juno_LTR_1-1A.fcs	2256	5097	1017	6424	1.04162	30.6814	86.3325
	24hrs_Jeko1_50U_IL2_don1_day_10_Experiment_Juno_LTR_1-1B.fcs	2101	5526	966	6233	1.01065	27.5469	86.5815
	24hrs_Jeko1_50U_IL2_don1_day_10_Experiment_Juno_LTR_1-1C.fcs	2240	5168	1053	6474	1.04972	30.2376	86.0104
	24hrs_Jeko1_50U_IL2_don1_day_10_Experiment_Juno_LTR_1-2A.fcs	2258	7561	591	3865	0.626689	22.9962	86.737
	24hrs_Jeko1_50U_IL2_don1_day_10_Experiment_Juno_LTR_1-2B.fcs	2720	7034	703	3783	0.613393	27.886	84.329
	24hrs_Jeko1_50U_IL2_don1_day_10_Experiment_Juno_LTR_1-2C.fcs	2379	7581	717	3609	0.58518	23.8855	83.4258
	24hrs_Jeko1_50U_IL2_don1_day_10_Experiment_Juno_LTR_1-4A.fcs	2442	9013	412	2147	0.348125	21.3182	83.9
	24hrs_Jeko1_50U_IL2_don1_day_10_Experiment_Juno_LTR_1-4B.fcs	2613	8967	474	2082	0.337585	22.5648	81.4554
	24hrs_Jeko1_50U_IL2_don1_day_10_Experiment_Juno_LTR_1-4C.fcs	3243	8299	411	2063	0.334504	28.0974	83.3872
	24hrs_Jeko1_50U_IL2_don1_day_10_Experiment_Juno_LTR_2-1A.fcs	1585	3550	1403	9333	1.5133	30.8666	86.9318
	24hrs_Jeko1_50U_IL2_don1_day_10_Experiment_Juno_LTR_2-1B.fcs	1552	3553	1448	9720	1.57605	30.4016	87.0344
	24hrs_Jeko1_50U_IL2_don1_day_10_Experiment_Juno_LTR_2-1C.fcs	1444	3685	1430	9420	1.5274	28.1536	86.8203
	Sample:	dead cells	live cells	dead cells	live cells
	24hrs_Jeko1_50U_IL2_don1_day_10_Experiment_Juno_TCRA_1-1A.fcs	1643	3403	1765	9331	1.51297	32.5604	84.0934
	24hrs_Jeko1_50U_IL2_don1_day_10_Experiment_Juno_TCRA_1-1B.fcs	1645	3675	1666	8705	1.41147	30.9211	83.936
	24hrs_Jeko1_50U_IL2_don1_day_10_Experiment_Juno_TCRA_1-1C.fcs	1807	3223	1689	8999	1.45914	35.9245	84.1972
	24hrs_Jeko1_50U_IL2_don1_day_10_Experiment_Juno_TCRA_1-2A.fcs	2552	4879	1287	6472	1.0494	34.3426	83.4128
	24hrs_Jeko1_50U_IL2_don1_day_10_Experiment_Juno_TCRA_1-2B.fcs	2832	4525	1283	6408	1.03902	38.494	83.3182
	24hrs_Jeko1_50U_IL2_don1_day_10_Experiment_Juno_TCRA_1-2C.fcs	2788	4644	1349	6222	1.00886	37.5135	82.182
	24hrs_Jeko1_50U_IL2_don1_day_10_Experiment_Juno_TCRA_1-4A.fcs	3888	5558	892	3687	0.597827	41.1603	80.5198
	24hrs_Jeko1_50U_IL2_don1_day_10_Experiment_Juno_TCRA_1-4B.fcs	3685	5880	1003	3800	0.61615	38.5259	79.1172
	24hrs_Jeko1_50U_IL2_don1_day_10_Experiment_Juno_TCRA_1-4C.fcs	4698	4769	966	3918	0.635283	49.625	80.2211
	24hrs_Jeko1_50U_IL2_don1_day_10_Experiment_Juno_TCRA_2-1A.fcs	1381	1906	2339	10246	1.66133	42.014	81.4144
	24hrs_Jeko1_50U_IL2_don1_day_10_Experiment_Juno_TCRA_2-1B.fcs	1384	2052	2391	10196	1.65323	40.2794	81.0042
	24hrs_Jeko1_50U_IL2_don1_day_10_Experiment_Juno_TCRA_2-1C.fcs	1395	2171	2497	9660	1.56632	39.1195	79.4604
	Sample:	dead cells	live cells	dead cells	live cells
	24hrs_Jeko1_50U_IL2_don1_day_10_Experiment_Juno_TCRB_1-1A.fcs	1811	3103	1619	9346	1.5154	36.8539	85.2348
	24hrs_Jeko1_50U_IL2_don1_day_10_Experiment_Juno_TCRB_1-1B.fcs	1489	3436	1421	9666	1.56729	30.2335	87.1832
	24hrs_Jeko1_50U_IL2_don1_day_10_Experiment_Juno_TCRB_1-1C.fcs	1809	3065	1526	9687	1.5707	37.1153	86.3908
	24hrs_Jeko1_50U_IL2_don1_day_10_Experiment_Juno_TCRB_1-2A.fcs	2242	4860	1065	7257	1.17668	31.5686	87.2026
	24hrs_Jeko1_50U_IL2_don1_day_10_Experiment_Juno_TCRB_1-2B.fcs	2462	2598	973	6189	1.00351	48.6561	86.4144
	24hrs_Jeko1_50U_IL2_don1_day_10_Experiment_Juno_TCRB_1-2C.fcs	2560	4439	1081	6661	1.08005	36.5767	86.0372
	24hrs_Jeko1_50U_IL2_don1_day_10_Experiment_Juno_TCRB_1-4A.fcs	3531	5750	734	4163	0.675008	38.0455	85.0112
	24hrs_Jeko1_50U_IL2_don1_day_10_Experiment_Juno_TCRB_1-4B.fcs	3517	5981	803	4281	0.694141	37.0288	84.2054
	24hrs_Jeko1_50U_IL2_don1_day_10_Experiment_Juno_TCRB_1-4C.fcs	4537	4672	820	4217	0.683764	49.267	83.7205
	24hrs_Jeko1_50U_IL2_don1_day_10_Experiment_Juno_TCRB_2-1A.fcs	1307	1698	2072	11262	1.82607	43.4942	84.4608
	24hrs_Jeko1_50U_IL2_don1_day_10_Experiment_Juno_TCRB_2-1B.fcs	1343	2025	1997	11141	1.80645	39.8753	84.7998
	24hrs_Jeko1_50U_IL2_don1_day_10_Experiment_Juno_TCRB_2-1C.fcs	1320	2136	2087	10756	1.74403	38.1944	83.7499

## Sheet: J-48hrs
		Jeko1	Jeko1	T cells	T cells	Normalized live T cells	Jeko1 dead %	CAR-T cells live %
	Sample:	dead cells	live cells	dead cells	live cells	(to 1:1 WPRE)
	48hrs_Jeko1_50U_IL2_don1_day_10_Experiment_Control_1-1A.fcs	2715	3408	931	9713	1.13065	44.341	91.2533		CAR-T to B tumor ratio		Control			WPRE			LTR			TCRA			TCRB
	48hrs_Jeko1_50U_IL2_don1_day_10_Experiment_Control_1-1B.fcs	2766	3256	835	9688	1.12774	45.9316	92.065		_2-1	62.6711	61.7486	58.1523	60.9894	62.2214	60.6114	68.3731	63.5859	62.4453	85.605	81.8841	79.6501	81.7957	78.632	76.8093
	48hrs_Jeko1_50U_IL2_don1_day_10_Experiment_Control_1-1C.fcs	2740	3446	844	9503	1.1062	44.2936	91.843		_1-1	44.341	45.9316	44.2936	65.9597	63.2054	62.8266	65.1321	66.3456	67.0145	#DIV/0!	65.8578	61.6715	64.6163	68.805	66.2668
	48hrs_Jeko1_50U_IL2_don1_day_10_Experiment_Control_1-2A.fcs	2955	5655	508	6493	0.75582	34.3206	92.7439		_1-2	34.3206	36.4097	39.5233	67.8859	70.0068	71.5625	70.6779	70.405	74.4357	66.0079	68.1583	68.9097	69.935	70.1418	71.7617
	48hrs_Jeko1_50U_IL2_don1_day_10_Experiment_Control_1-2B.fcs	3160	5519	576	6433	0.748836	36.4097	91.782		_1-4	29.4449	28.8035	32.8609	72.4278	74.1939	77.5012	74.3614	76.5346	77.7074	76.0255	75.4675	78.9	77.5594	79.0695	81.2965
	48hrs_Jeko1_50U_IL2_don1_day_10_Experiment_Control_1-2C.fcs	3333	5100	611	6805	0.792139	39.5233	91.7611
	48hrs_Jeko1_50U_IL2_don1_day_10_Experiment_Control_1-4A.fcs	3135	7512	348	4199	0.488786	29.4449	92.3466
	48hrs_Jeko1_50U_IL2_don1_day_10_Experiment_Control_1-4B.fcs	3103	7670	290	4140	0.481918	28.8035	93.4537		CAR-T to B tumor ratio		Cntrl T cells			WPRE T cells			LTR T cells			TCRA T cells			TCRB T cells
	48hrs_Jeko1_50U_IL2_don1_day_10_Experiment_Control_1-4C.fcs	3408	6963	336	3978	0.463061	32.8609	92.2114		_2-1	1.45914	1.40536	1.40804	1.2637	1.26055	1.22354	1.16603	1.18629	1.13519	1.38196	1.40106	1.30979	1.4333	1.41305	1.34739
	48hrs_Jeko1_50U_IL2_don1_day_10_Experiment_Control_2-1A.fcs	2243	1336	1278	12535	1.45914	62.6711	90.7478		_1-1	1.13065	1.12774	1.1062	1.02844	0.988864	0.982694	0.987467	0.946958	0.893644	0	1.06755	1.04357	1.17639	1.11295	1.0601
	48hrs_Jeko1_50U_IL2_don1_day_10_Experiment_Control_2-1B.fcs	2373	1470	1336	12073	1.40536	61.7486	90.0365		_1-2	0.75582	0.748836	0.792139	0.703089	0.755005	0.739407	0.630568	0.658971	0.673987	0.951149	0.974895	0.968027	0.950217	0.973033	0.940905
	48hrs_Jeko1_50U_IL2_don1_day_10_Experiment_Control_2-1C.fcs	2222	1599	1272	12096	1.40804	58.1523	90.4847		_1-4	0.488786	0.481918	0.463061	0.467368	0.440245	0.405789	0.421155	0.428954	0.344444	0.783525	0.774794	0.702972	0.701226	0.634642	0.645934
	Sample:	dead cells	live cells	dead cells	live cells
	48hrs_Jeko1_50U_IL2_don1_day_10_Experiment_Juno_WPRE_1-1A.fcs	3079	1589	1899	8835	1.02844	65.9597	82.3086
	48hrs_Jeko1_50U_IL2_don1_day_10_Experiment_Juno_WPRE_1-1B.fcs	3013	1754	1802	8495	0.988864	63.2054	82.4998
	48hrs_Jeko1_50U_IL2_don1_day_10_Experiment_Juno_WPRE_1-1C.fcs	3054	1807	1756	8442	0.982694	62.8266	82.7809
	48hrs_Jeko1_50U_IL2_don1_day_10_Experiment_Juno_WPRE_1-2A.fcs	5067	2397	1288	6040	0.703089	67.8859	82.4236
	48hrs_Jeko1_50U_IL2_don1_day_10_Experiment_Juno_WPRE_1-2B.fcs	5121	2194	1460	6486	0.755005	70.0068	81.626
	48hrs_Jeko1_50U_IL2_don1_day_10_Experiment_Juno_WPRE_1-2C.fcs	5189	2062	1473	6352	0.739407	71.5625	81.1757
	48hrs_Jeko1_50U_IL2_don1_day_10_Experiment_Juno_WPRE_1-4A.fcs	7145	2720	1048	4015	0.467368	72.4278	79.3008
	48hrs_Jeko1_50U_IL2_don1_day_10_Experiment_Juno_WPRE_1-4B.fcs	7340	2553	1063	3782	0.440245	74.1939	78.0599
	48hrs_Jeko1_50U_IL2_don1_day_10_Experiment_Juno_WPRE_1-4C.fcs	8157	2368	918	3486	0.405789	77.5012	79.1553
	48hrs_Jeko1_50U_IL2_don1_day_10_Experiment_Juno_WPRE_2-1A.fcs	1615	1033	1747	10856	1.2637	60.9894	86.1382
	48hrs_Jeko1_50U_IL2_don1_day_10_Experiment_Juno_WPRE_2-1B.fcs	1647	1000	1959	10829	1.26055	62.2214	84.681
	48hrs_Jeko1_50U_IL2_don1_day_10_Experiment_Juno_WPRE_2-1C.fcs	1725	1121	1952	10511	1.22354	60.6114	84.3376
	Sample:	dead cells	live cells	dead cells	live cells
	48hrs_Jeko1_50U_IL2_don1_day_10_Experiment_Juno_LTR_1-1A.fcs	3155	1689	1838	8483	0.987467	65.1321	82.1916
	48hrs_Jeko1_50U_IL2_don1_day_10_Experiment_Juno_LTR_1-1B.fcs	3375	1712	1890	8135	0.946958	66.3456	81.1471
	48hrs_Jeko1_50U_IL2_don1_day_10_Experiment_Juno_LTR_1-1C.fcs	3468	1707	1889	7677	0.893644	67.0145	80.253
	48hrs_Jeko1_50U_IL2_don1_day_10_Experiment_Juno_LTR_1-2A.fcs	5609	2327	1330	5417	0.630568	70.6779	80.2875
	48hrs_Jeko1_50U_IL2_don1_day_10_Experiment_Juno_LTR_1-2B.fcs	5650	2375	1409	5661	0.658971	70.405	80.0707
	48hrs_Jeko1_50U_IL2_don1_day_10_Experiment_Juno_LTR_1-2C.fcs	5870	2016	1387	5790	0.673987	74.4357	80.6744
	48hrs_Jeko1_50U_IL2_don1_day_10_Experiment_Juno_LTR_1-4A.fcs	7802	2690	952	3618	0.421155	74.3614	79.1685
	48hrs_Jeko1_50U_IL2_don1_day_10_Experiment_Juno_LTR_1-4B.fcs	8017	2458	1033	3685	0.428954	76.5346	78.1051
	48hrs_Jeko1_50U_IL2_don1_day_10_Experiment_Juno_LTR_1-4C.fcs	8589	2464	835	2959	0.344444	77.7074	77.9916
	48hrs_Jeko1_50U_IL2_don1_day_10_Experiment_Juno_LTR_2-1A.fcs	1950	902	2021	10017	1.16603	68.3731	83.2115
	48hrs_Jeko1_50U_IL2_don1_day_10_Experiment_Juno_LTR_2-1B.fcs	1947	1115	2090	10191	1.18629	63.5859	82.9818
	48hrs_Jeko1_50U_IL2_don1_day_10_Experiment_Juno_LTR_2-1C.fcs	1997	1201	2174	9752	1.13519	62.4453	81.7709
	Sample:	dead cells	live cells	dead cells	live cells
	48hrs_Jeko1_50U_IL2_don1_day_10_Experiment_Juno_TCRA_1-1A.fcs	0	0	0	0	0	#DIV/0!	#DIV/0!
	48hrs_Jeko1_50U_IL2_don1_day_10_Experiment_Juno_TCRA_1-1B.fcs	1927	999	2700	9171	1.06755	65.8578	77.2555
	48hrs_Jeko1_50U_IL2_don1_day_10_Experiment_Juno_TCRA_1-1C.fcs	1926	1197	2508	8965	1.04357	61.6715	78.14
	48hrs_Jeko1_50U_IL2_don1_day_10_Experiment_Juno_TCRA_1-2A.fcs	2839	1462	2160	8171	0.951149	66.0079	79.0921
	48hrs_Jeko1_50U_IL2_don1_day_10_Experiment_Juno_TCRA_1-2B.fcs	3031	1416	2182	8375	0.974895	68.1583	79.3312
	48hrs_Jeko1_50U_IL2_don1_day_10_Experiment_Juno_TCRA_1-2C.fcs	2939	1326	2250	8316	0.968027	68.9097	78.7053
	48hrs_Jeko1_50U_IL2_don1_day_10_Experiment_Juno_TCRA_1-4A.fcs	5004	1578	1743	6731	0.783525	76.0255	79.4312
	48hrs_Jeko1_50U_IL2_don1_day_10_Experiment_Juno_TCRA_1-4B.fcs	5045	1640	1697	6656	0.774794	75.4675	79.6839
	48hrs_Jeko1_50U_IL2_don1_day_10_Experiment_Juno_TCRA_1-4C.fcs	5523	1477	1757	6039	0.702972	78.9	77.4628
	48hrs_Jeko1_50U_IL2_don1_day_10_Experiment_Juno_TCRA_2-1A.fcs	1231	207	2334	11872	1.38196	85.605	83.5703
	48hrs_Jeko1_50U_IL2_don1_day_10_Experiment_Juno_TCRA_2-1B.fcs	1356	300	2238	12036	1.40106	81.8841	84.3211
	48hrs_Jeko1_50U_IL2_don1_day_10_Experiment_Juno_TCRA_2-1C.fcs	1366	349	2540	11252	1.30979	79.6501	81.5835
	Sample:	dead cells	live cells	dead cells	live cells
	48hrs_Jeko1_50U_IL2_don1_day_10_Experiment_Juno_TCRB_1-1A.fcs	2080	1139	2196	10106	1.17639	64.6163	82.1492
	48hrs_Jeko1_50U_IL2_don1_day_10_Experiment_Juno_TCRB_1-1B.fcs	2188	992	2324	9561	1.11295	68.805	80.4459
	48hrs_Jeko1_50U_IL2_don1_day_10_Experiment_Juno_TCRB_1-1C.fcs	2320	1181	2301	9107	1.0601	66.2668	79.8299
	48hrs_Jeko1_50U_IL2_don1_day_10_Experiment_Juno_TCRB_1-2A.fcs	3445	1481	1868	8163	0.950217	69.935	81.3777
	48hrs_Jeko1_50U_IL2_don1_day_10_Experiment_Juno_TCRB_1-2B.fcs	3364	1432	2082	8359	0.973033	70.1418	80.0594
	48hrs_Jeko1_50U_IL2_don1_day_10_Experiment_Juno_TCRB_1-2C.fcs	3601	1417	2080	8083	0.940905	71.7617	79.5336
	48hrs_Jeko1_50U_IL2_don1_day_10_Experiment_Juno_TCRB_1-4A.fcs	6038	1747	1536	6024	0.701226	77.5594	79.6825
	48hrs_Jeko1_50U_IL2_don1_day_10_Experiment_Juno_TCRB_1-4B.fcs	6203	1642	1425	5452	0.634642	79.0695	79.2788
	48hrs_Jeko1_50U_IL2_don1_day_10_Experiment_Juno_TCRB_1-4C.fcs	6333	1457	1451	5549	0.645934	81.2965	79.2714
	48hrs_Jeko1_50U_IL2_don1_day_10_Experiment_Juno_TCRB_2-1A.fcs	1321	294	2186	12313	1.4333	81.7957	84.9231
	48hrs_Jeko1_50U_IL2_don1_day_10_Experiment_Juno_TCRB_2-1B.fcs	1391	378	2116	12139	1.41305	78.632	85.1561
	48hrs_Jeko1_50U_IL2_don1_day_10_Experiment_Juno_TCRB_2-1C.fcs	1454	439	2207	11575	1.34739	76.8093	83.9864

## Sheet: J-72hrs
		Jeko1	Jeko1	T cells	T cells	Normalized live T cells	Jeko1 dead %	CAR-T cells live %
	Sample:	dead cells	live cells	dead cells	live cells	(to 1:1 WPRE)
	72hrs_Jeko1_50U_IL2_don1_day_10_Experiment_Control_1-1A.fcs	4636	1192	1300	9049	0.864499	79.547	87.4384		CAR-T to B tumor ratio		Control			WPRE			LTR			TCRA			TCRB
	72hrs_Jeko1_50U_IL2_don1_day_10_Experiment_Control_1-1B.fcs	4630	1232	1170	8984	0.858289	78.9833	88.4774		_2-1	84.4069	83.449	80.8081	77.3857	80.5353	75.5344	77.9605	79.6053	79.6491	94.1107	95.7399	95.2297	94.3169	94.7754	95.1449
	72hrs_Jeko1_50U_IL2_don1_day_10_Experiment_Control_1-1C.fcs	4469	1219	1368	9170	0.876059	78.5689	87.0184		_1-1	79.547	78.9833	78.5689	66.0365	66.6184	67.2009	70.0202	69.5539	70.6616	86.1613	82.3389	84.3057	82.7754	82.3679	83.9911
	72hrs_Jeko1_50U_IL2_don1_day_10_Experiment_Control_1-2A.fcs	6153	2276	775	6601	0.630629	72.998	89.493		_1-2	72.998	72.086	74.4818	67.5505	70.7325	71.2022	75.6545	75.8484	73.9481	70.2395	74.26	73.7968	74.2334	75.6362	75.6439
	72hrs_Jeko1_50U_IL2_don1_day_10_Experiment_Control_1-2B.fcs	5937	2299	780	6852	0.654608	72.086	89.7799		_1-4	60.8746	57.757	60.7108	75.7358	76.5204	84.4212	79.8324	81.172	86.9246	72.0497	73.4128	79.7719	79.4133	79.6527	81.0826
	72hrs_Jeko1_50U_IL2_don1_day_10_Experiment_Control_1-2C.fcs	6109	2093	824	6499	0.620884	74.4818	88.7478
	72hrs_Jeko1_50U_IL2_don1_day_10_Experiment_Control_1-4A.fcs	6348	4080	456	4302	0.410993	60.8746	90.4161
	72hrs_Jeko1_50U_IL2_don1_day_10_Experiment_Control_1-4B.fcs	5979	4373	375	3889	0.371537	57.757	91.2054		CAR-T to B tumor ratio		Cntrl T cells			WPRE T cells			LTR T cells			TCRA T cells			TCRB T cells
	72hrs_Jeko1_50U_IL2_don1_day_10_Experiment_Control_1-4C.fcs	6303	4079	419	3692	0.352716	60.7108	89.8078		_2-1	1.08012	1.04735	1.13123	1.12703	1.13888	1.11528	0.940736	1.09044	1.03436	1.06044	1.01965	1.08557	1.14824	1.16563	1.13964
	72hrs_Jeko1_50U_IL2_don1_day_10_Experiment_Control_2-1A.fcs	2647	489	1674	11306	1.08012	84.4069	87.1032		_1-1	0.864499	0.858289	0.876059	0.92182	1.03398	1.0442	0.933476	0.826094	0.887905	0.951054	0.882364	0.889338	1.06063	0.841666	1.02844
	72hrs_Jeko1_50U_IL2_don1_day_10_Experiment_Control_2-1B.fcs	2526	501	1409	10963	1.04735	83.449	88.6114		_1-2	0.630629	0.654608	0.620884	0.849118	0.956213	0.95392	0.785778	0.761512	0.808706	0.768295	0.914751	0.919241	0.974747	1.00274	0.883606
	72hrs_Jeko1_50U_IL2_don1_day_10_Experiment_Control_2-1C.fcs	2720	646	1460	11841	1.13123	80.8081	89.0234		_1-4	0.410993	0.371537	0.352716	0.798102	0.732947	0.66827	0.703904	0.615152	0.569677	1.00532	0.930132	0.848449	0.80928	0.777562	0.729412
	Sample:	dead cells	live cells	dead cells	live cells
	72hrs_Jeko1_50U_IL2_don1_day_10_Experiment_Juno_WPRE_1-1A.fcs	1013	521	1914	9649	0.92182	66.0365	83.4472
	72hrs_Jeko1_50U_IL2_don1_day_10_Experiment_Juno_WPRE_1-1B.fcs	1379	691	2571	10823	1.03398	66.6184	80.8048
	72hrs_Jeko1_50U_IL2_don1_day_10_Experiment_Juno_WPRE_1-1C.fcs	1258	614	2604	10930	1.0442	67.2009	80.7596
	72hrs_Jeko1_50U_IL2_don1_day_10_Experiment_Juno_WPRE_1-2A.fcs	1707	820	1739	8888	0.849118	67.5505	83.636
	72hrs_Jeko1_50U_IL2_don1_day_10_Experiment_Juno_WPRE_1-2B.fcs	2076	859	2178	10009	0.956213	70.7325	82.1285
	72hrs_Jeko1_50U_IL2_don1_day_10_Experiment_Juno_WPRE_1-2C.fcs	2067	836	2168	9985	0.95392	71.2022	82.1608
	72hrs_Jeko1_50U_IL2_don1_day_10_Experiment_Juno_WPRE_1-4A.fcs	3371	1080	1810	8354	0.798102	75.7358	82.1921
	72hrs_Jeko1_50U_IL2_don1_day_10_Experiment_Juno_WPRE_1-4B.fcs	3523	1081	1821	7672	0.732947	76.5204	80.8174
	72hrs_Jeko1_50U_IL2_don1_day_10_Experiment_Juno_WPRE_1-4C.fcs	4682	864	1923	6995	0.66827	84.4212	78.4369
	72hrs_Jeko1_50U_IL2_don1_day_10_Experiment_Juno_WPRE_2-1A.fcs	965	282	3013	11797	1.12703	77.3857	79.6556
	72hrs_Jeko1_50U_IL2_don1_day_10_Experiment_Juno_WPRE_2-1B.fcs	993	240	2902	11921	1.13888	80.5353	80.4223
	72hrs_Jeko1_50U_IL2_don1_day_10_Experiment_Juno_WPRE_2-1C.fcs	954	309	2959	11674	1.11528	75.5344	79.7786
	Sample:	dead cells	live cells	dead cells	live cells
	72hrs_Jeko1_50U_IL2_don1_day_10_Experiment_Juno_LTR_1-1A.fcs	1733	742	2729	9771	0.933476	70.0202	78.168
	72hrs_Jeko1_50U_IL2_don1_day_10_Experiment_Juno_LTR_1-1B.fcs	1871	819	2656	8647	0.826094	69.5539	76.5018
	72hrs_Jeko1_50U_IL2_don1_day_10_Experiment_Juno_LTR_1-1C.fcs	1869	776	2905	9294	0.887905	70.6616	76.1866
	72hrs_Jeko1_50U_IL2_don1_day_10_Experiment_Juno_LTR_1-2A.fcs	2803	902	2591	8225	0.785778	75.6545	76.0447
	72hrs_Jeko1_50U_IL2_don1_day_10_Experiment_Juno_LTR_1-2B.fcs	2861	911	2666	7971	0.761512	75.8484	74.9365
	72hrs_Jeko1_50U_IL2_don1_day_10_Experiment_Juno_LTR_1-2C.fcs	2847	1003	2411	8465	0.808706	73.9481	77.8319
	72hrs_Jeko1_50U_IL2_don1_day_10_Experiment_Juno_LTR_1-4A.fcs	4287	1083	2085	7368	0.703904	79.8324	77.9435
	72hrs_Jeko1_50U_IL2_don1_day_10_Experiment_Juno_LTR_1-4B.fcs	4876	1131	1629	6439	0.615152	81.172	79.8091
	72hrs_Jeko1_50U_IL2_don1_day_10_Experiment_Juno_LTR_1-4C.fcs	5684	855	1809	5963	0.569677	86.9246	76.7241
	72hrs_Jeko1_50U_IL2_don1_day_10_Experiment_Juno_LTR_2-1A.fcs	948	268	2519	9847	0.940736	77.9605	79.6296
	72hrs_Jeko1_50U_IL2_don1_day_10_Experiment_Juno_LTR_2-1B.fcs	1210	310	2816	11414	1.09044	79.6053	80.2108
	72hrs_Jeko1_50U_IL2_don1_day_10_Experiment_Juno_LTR_2-1C.fcs	1362	348	2950	10827	1.03436	79.6491	78.5875
	Sample:	dead cells	live cells	dead cells	live cells
	72hrs_Jeko1_50U_IL2_don1_day_10_Experiment_Juno_TCRA_1-1A.fcs	1239	199	3884	9955	0.951054	86.1613	71.9344
	72hrs_Jeko1_50U_IL2_don1_day_10_Experiment_Juno_TCRA_1-1B.fcs	1380	296	4107	9236	0.882364	82.3389	69.2198
	72hrs_Jeko1_50U_IL2_don1_day_10_Experiment_Juno_TCRA_1-1C.fcs	1445	269	4033	9309	0.889338	84.3057	69.7721
	72hrs_Jeko1_50U_IL2_don1_day_10_Experiment_Juno_TCRA_1-2A.fcs	1173	497	3136	8042	0.768295	70.2395	71.9449
	72hrs_Jeko1_50U_IL2_don1_day_10_Experiment_Juno_TCRA_1-2B.fcs	1405	487	3557	9575	0.914751	74.26	72.9135
	72hrs_Jeko1_50U_IL2_don1_day_10_Experiment_Juno_TCRA_1-2C.fcs	1380	490	3580	9622	0.919241	73.7968	72.8829
	72hrs_Jeko1_50U_IL2_don1_day_10_Experiment_Juno_TCRA_1-4A.fcs	1972	765	2262	10523	1.00532	72.0497	82.3074
	72hrs_Jeko1_50U_IL2_don1_day_10_Experiment_Juno_TCRA_1-4B.fcs	2093	758	2518	9736	0.930132	73.4128	79.4516
	72hrs_Jeko1_50U_IL2_don1_day_10_Experiment_Juno_TCRA_1-4C.fcs	2378	603	2908	8881	0.848449	79.7719	75.3329
	72hrs_Jeko1_50U_IL2_don1_day_10_Experiment_Juno_TCRA_2-1A.fcs	799	50	3762	11100	1.06044	94.1107	74.6871
	72hrs_Jeko1_50U_IL2_don1_day_10_Experiment_Juno_TCRA_2-1B.fcs	854	38	3007	10673	1.01965	95.7399	78.019
	72hrs_Jeko1_50U_IL2_don1_day_10_Experiment_Juno_TCRA_2-1C.fcs	1078	54	3368	11363	1.08557	95.2297	77.1367
	Sample:	dead cells	live cells	dead cells	live cells
	72hrs_Jeko1_50U_IL2_don1_day_10_Experiment_Juno_TCRB_1-1A.fcs	1360	283	2887	11102	1.06063	82.7754	79.3624
	72hrs_Jeko1_50U_IL2_don1_day_10_Experiment_Juno_TCRB_1-1B.fcs	1294	277	2527	8810	0.841666	82.3679	77.7102
	72hrs_Jeko1_50U_IL2_don1_day_10_Experiment_Juno_TCRB_1-1C.fcs	1511	288	3113	10765	1.02844	83.9911	77.5688
	72hrs_Jeko1_50U_IL2_don1_day_10_Experiment_Juno_TCRB_1-2A.fcs	1864	647	2770	10203	0.974747	74.2334	78.648
	72hrs_Jeko1_50U_IL2_don1_day_10_Experiment_Juno_TCRB_1-2B.fcs	1813	584	2688	10496	1.00274	75.6362	79.6117
	72hrs_Jeko1_50U_IL2_don1_day_10_Experiment_Juno_TCRB_1-2C.fcs	1674	539	2490	9249	0.883606	75.6439	78.7887
	72hrs_Jeko1_50U_IL2_don1_day_10_Experiment_Juno_TCRB_1-4A.fcs	3086	800	2454	8471	0.80928	79.4133	77.5378
	72hrs_Jeko1_50U_IL2_don1_day_10_Experiment_Juno_TCRB_1-4B.fcs	3073	785	2478	8139	0.777562	79.6527	76.6601
	72hrs_Jeko1_50U_IL2_don1_day_10_Experiment_Juno_TCRB_1-4C.fcs	2966	692	2759	7635	0.729412	81.0826	73.4558
	72hrs_Jeko1_50U_IL2_don1_day_10_Experiment_Juno_TCRB_2-1A.fcs	863	52	3243	12019	1.14824	94.3169	78.7511
	72hrs_Jeko1_50U_IL2_don1_day_10_Experiment_Juno_TCRB_2-1B.fcs	1034	57	3065	12201	1.16563	94.7754	79.9227
	72hrs_Jeko1_50U_IL2_don1_day_10_Experiment_Juno_TCRB_2-1C.fcs	1215	62	2828	11929	1.13964	95.1449	80.8362
