# Supplementary material for: Robust T cell activation requires an eIF3-driven burst in T cell receptor translation
Source: eLife journal article supplement (doi:10.7554/elife.74272), 2021-12-31
Supplement: supp [file DeSilva_Figure6-figure-supplement-3.xlsx]

## Sheet: N-24hrs
						Normalized live T cells	NALM6 dead %	CAR-T cells live %
	Sample:	Lymphocytes/Single Cells/dead cells/NALM6_cells | Count	Lymphocytes/Single Cells/Live cells/NALM6_cells | Count	Lymphocytes/Single Cells/dead cells/CAR-T cells | Count	Lymphocytes/Single Cells/Live cells/CAR-T cells | Count	(to 1:1 WPRE)
	24hrs_NALM6_500IL2_Experiment_Control_1-1A.fcs	928	2448	343	4588	3.00131	27.4882	93.044		CAR-T to B tumor ratio		Control			WPRE			LTR			TCRA			TCRB
	24hrs_NALM6_500IL2_Experiment_Control_1-1B.fcs	915	2537	349	4347	2.84365	26.5064	92.5681		_2-1	39.0392	41.5741	36.6158	63.4113	63.6334	64.3347	71.0774	71.497	67.9537	72.4757	71.0962	70.843	76.9501	73.31	75.5967
	24hrs_NALM6_500IL2_Experiment_Control_1-1C.fcs	840	2515	297	4451	2.91169	25.0373	93.7447		_1-1	27.4882	26.5064	25.0373	50.599	51.2869	53.6357	59.7941	59.1847	59.2221	60.9361	62.4814	65.2956	68.6252	69.2676	68.3114
	24hrs_NALM6_500IL2_Experiment_Control_1-2A.fcs	993	3277	204	3020	1.97558	23.2553	93.6725		_1-2	23.2553	22.0327	24.4294	43.6216	44.1176	46.3371	49.7899	48.9388	58.4545	62.0434	56.6634	57.3002	71.1911	66.2612	63.0845
	24hrs_NALM6_500IL2_Experiment_Control_1-2B.fcs	943	3337	194	3128	2.04623	22.0327	94.1601		_1-4	24.3162	24.2052	28.0619	33.8855	37.943	37.3897	35.7194	38.0917	40.6608	51.929	51.1806	53.2209	61.68	57.5588	67.3715
	24hrs_NALM6_500IL2_Experiment_Control_1-2C.fcs	1049	3245	226	3025	1.97885	24.4294	93.0483
	24hrs_NALM6_500IL2_Experiment_Control_1-4A.fcs	1209	3763	145	1890	1.23637	24.3162	92.8747
	24hrs_NALM6_500IL2_Experiment_Control_1-4B.fcs	1203	3767	122	1869	1.22263	24.2052	93.8724		CAR-T to B tumor ratio		Cntrl T cells			WPRE T cells			LTR T cells			TCRA T cells			TCRB T cells
	24hrs_NALM6_500IL2_Experiment_Control_1-4C.fcs	1432	3671	150	1887	1.23441	28.0619	92.6362		_2-1	3.87724	3.81574	3.80462	1.87614	1.89969	1.86437	2.51134	2.42237	2.53489	2.91496	3.05953	2.88748	3.24989	3.34802	3.26559
	24hrs_NALM6_500IL2_Experiment_Control_2-1A.fcs	837	1307	673	5927	3.87724	39.0392	89.803		_1-1	3.00131	2.84365	2.91169	1.04339	1.00153	0.955081	1.43066	1.25534	1.29721	1.85063	1.70999	1.68971	2.24967	2.00763	2.11819
	24hrs_NALM6_500IL2_Experiment_Control_2-1B.fcs	898	1262	682	5833	3.81574	41.5741	89.5318		_1-2	1.97558	2.04623	1.97885	0.702573	0.718273	0.758177	0.805277	0.768644	0.635848	1.04993	1.0604	1.06563	1.30964	1.55037	1.45225
	24hrs_NALM6_500IL2_Experiment_Control_2-1C.fcs	792	1371	624	5816	3.80462	36.6158	90.3106		_1-4	1.23637	1.22263	1.23441	0.472307	0.397732	0.429786	0.585478	0.573048	0.578282	0.859573	0.809202	0.835369	1.05778	1.13628	0.955081
	Sample:	Lymphocytes/Single Cells/dead cells/NALM6_cells | Count	Lymphocytes/Single Cells/Live cells/NALM6_cells | Count	Lymphocytes/Single Cells/dead cells/CAR-T cells | Count	Lymphocytes/Single Cells/Live cells/CAR-T cells | Count
	24hrs_NALM6_500IL2_Experiment_WPRE_1-1A.fcs	2154	2103	1353	1595	1.04339	50.599	54.1045
	24hrs_NALM6_500IL2_Experiment_WPRE_1-1B.fcs	2172	2063	1284	1531	1.00153	51.2869	54.3872
	24hrs_NALM6_500IL2_Experiment_WPRE_1-1C.fcs	2235	1932	1526	1460	0.955081	53.6357	48.8948
	24hrs_NALM6_500IL2_Experiment_WPRE_1-2A.fcs	2209	2855	700	1074	0.702573	43.6216	60.5411
	24hrs_NALM6_500IL2_Experiment_WPRE_1-2B.fcs	2160	2736	719	1098	0.718273	44.1176	60.4293
	24hrs_NALM6_500IL2_Experiment_WPRE_1-2C.fcs	2334	2703	724	1159	0.758177	46.3371	61.5507
	24hrs_NALM6_500IL2_Experiment_WPRE_1-4A.fcs	1882	3672	216	722	0.472307	33.8855	76.9723
	24hrs_NALM6_500IL2_Experiment_WPRE_1-4B.fcs	1970	3222	413	608	0.397732	37.943	59.5495
	24hrs_NALM6_500IL2_Experiment_WPRE_1-4C.fcs	2077	3478	186	657	0.429786	37.3897	77.9359
	24hrs_NALM6_500IL2_Experiment_WPRE_2-1A.fcs	1870	1079	2061	2868	1.87614	63.4113	58.1862
	24hrs_NALM6_500IL2_Experiment_WPRE_2-1B.fcs	1944	1111	1974	2904	1.89969	63.6334	59.5326
	24hrs_NALM6_500IL2_Experiment_WPRE_2-1C.fcs	1968	1091	1879	2850	1.86437	64.3347	60.2664
	Sample:	Lymphocytes/Single Cells/dead cells/NALM6_cells | Count	Lymphocytes/Single Cells/Live cells/NALM6_cells | Count	Lymphocytes/Single Cells/dead cells/CAR-T cells | Count	Lymphocytes/Single Cells/Live cells/CAR-T cells | Count
	24hrs_NALM6_500IL2_Experiment_LTR_1-1A.fcs	2323	1562	1271	2187	1.43066	59.7941	63.2447
	24hrs_NALM6_500IL2_Experiment_LTR_1-1B.fcs	2352	1622	1278	1919	1.25534	59.1847	60.025
	24hrs_NALM6_500IL2_Experiment_LTR_1-1C.fcs	2360	1625	1197	1983	1.29721	59.2221	62.3585
	24hrs_NALM6_500IL2_Experiment_LTR_1-2A.fcs	2370	2390	964	1231	0.805277	49.7899	56.082
	24hrs_NALM6_500IL2_Experiment_LTR_1-2B.fcs	2352	2454	921	1175	0.768644	48.9388	56.0592
	24hrs_NALM6_500IL2_Experiment_LTR_1-2C.fcs	2814	2000	1191	972	0.635848	58.4545	44.9376
	24hrs_NALM6_500IL2_Experiment_LTR_1-4A.fcs	1981	3565	305	895	0.585478	35.7194	74.5833
	24hrs_NALM6_500IL2_Experiment_LTR_1-4B.fcs	2060	3348	254	876	0.573048	38.0917	77.5221
	24hrs_NALM6_500IL2_Experiment_LTR_1-4C.fcs	2203	3215	246	884	0.578282	40.6608	78.2301
	24hrs_NALM6_500IL2_Experiment_LTR_2-1A.fcs	1735	706	1933	3839	2.51134	71.0774	66.5107
	24hrs_NALM6_500IL2_Experiment_LTR_2-1B.fcs	1791	714	1722	3703	2.42237	71.497	68.2581
	24hrs_NALM6_500IL2_Experiment_LTR_2-1C.fcs	1760	830	1591	3875	2.53489	67.9537	70.8928
	Sample:	Lymphocytes/Single Cells/dead cells/NALM6_cells | Count	Lymphocytes/Single Cells/Live cells/NALM6_cells | Count	Lymphocytes/Single Cells/dead cells/CAR-T cells | Count	Lymphocytes/Single Cells/Live cells/CAR-T cells | Count
	24hrs_NALM6_500IL2_Experiment_TCRA_1-1A.fcs	1992	1277	1549	2829	1.85063	60.9361	64.6185
	24hrs_NALM6_500IL2_Experiment_TCRA_1-1B.fcs	2095	1258	1460	2614	1.70999	62.4814	64.163
	24hrs_NALM6_500IL2_Experiment_TCRA_1-1C.fcs	2143	1139	1485	2583	1.68971	65.2956	63.4956
	24hrs_NALM6_500IL2_Experiment_TCRA_1-2A.fcs	2514	1538	1509	1605	1.04993	62.0434	51.5414
	24hrs_NALM6_500IL2_Experiment_TCRA_1-2B.fcs	2279	1743	1443	1621	1.0604	56.6634	52.9047
	24hrs_NALM6_500IL2_Experiment_TCRA_1-2C.fcs	2237	1667	1448	1629	1.06563	57.3002	52.9412
	24hrs_NALM6_500IL2_Experiment_TCRA_1-4A.fcs	2342	2168	945	1314	0.859573	51.929	58.1673
	24hrs_NALM6_500IL2_Experiment_TCRA_1-4B.fcs	2406	2295	824	1237	0.809202	51.1806	60.0194
	24hrs_NALM6_500IL2_Experiment_TCRA_1-4C.fcs	2429	2135	845	1277	0.835369	53.2209	60.1791
	24hrs_NALM6_500IL2_Experiment_TCRA_2-1A.fcs	1414	537	1792	4456	2.91496	72.4757	71.3188
	24hrs_NALM6_500IL2_Experiment_TCRA_2-1B.fcs	1375	559	1560	4677	3.05953	71.0962	74.988
	24hrs_NALM6_500IL2_Experiment_TCRA_2-1C.fcs	1521	626	1327	4414	2.88748	70.843	76.8856
	Sample:	Lymphocytes/Single Cells/dead cells/NALM6_cells | Count	Lymphocytes/Single Cells/Live cells/NALM6_cells | Count	Lymphocytes/Single Cells/dead cells/CAR-T cells | Count	Lymphocytes/Single Cells/Live cells/CAR-T cells | Count
	24hrs_NALM6_500IL2_Experiment_TCRB_1-1A.fcs	1822	833	1758	3439	2.24967	68.6252	66.1728
	24hrs_NALM6_500IL2_Experiment_TCRB_1-1B.fcs	2024	898	1574	3069	2.00763	69.2676	66.0995
	24hrs_NALM6_500IL2_Experiment_TCRB_1-1C.fcs	1869	867	1687	3238	2.11819	68.3114	65.7462
	24hrs_NALM6_500IL2_Experiment_TCRB_1-2A.fcs	2612	1057	1567	2002	1.30964	71.1911	56.0941
	24hrs_NALM6_500IL2_Experiment_TCRB_1-2B.fcs	2288	1165	1627	2370	1.55037	66.2612	59.2945
	24hrs_NALM6_500IL2_Experiment_TCRB_1-2C.fcs	2307	1350	1364	2220	1.45225	63.0845	61.942
	24hrs_NALM6_500IL2_Experiment_TCRB_1-4A.fcs	2614	1624	1239	1617	1.05778	61.68	56.6176
	24hrs_NALM6_500IL2_Experiment_TCRB_1-4B.fcs	2471	1822	923	1737	1.13628	57.5588	65.3008
	24hrs_NALM6_500IL2_Experiment_TCRB_1-4C.fcs	2740	1327	1290	1460	0.955081	67.3715	53.0909
	24hrs_NALM6_500IL2_Experiment_TCRB_2-1A.fcs	1312	393	1769	4968	3.24989	76.9501	73.742
	24hrs_NALM6_500IL2_Experiment_TCRB_2-1B.fcs	1258	458	1506	5118	3.34802	73.31	77.2645
	24hrs_NALM6_500IL2_Experiment_TCRB_2-1C.fcs	1267	409	1333	4992	3.26559	75.5967	78.9249

## Sheet: N-48hrs
						Normalized live T cells	NALM6 dead %	CAR-T cells live %
	Sample:	Lymphocytes/Single Cells/dead cells/NALM6_cells | Count	Lymphocytes/Single Cells/Live cells/NALM6_cells | Count	Lymphocytes/Single Cells/dead cells/CAR-T cells | Count	Lymphocytes/Single Cells/Live cells/CAR-T cells | Count	(to 1:1 WPRE)
	48hrs_NALM6_500IL2_Experiment_Control_1-1A.fcs	1489	1034	514	4964	2.31746	59.017	90.617		CAR-T to B tumor ratio		Control			WPRE			LTR			TCRA			TCRB
	48hrs_NALM6_500IL2_Experiment_Control_1-1B.fcs	1351	1071	432	5000	2.33427	55.7803	92.0471		_2-1	72.2255	74.3099	74.5989	89.6414	86.9194	87.941	91.4729	91.0345	90.684	90.8752	91.6252	90.225	92.4195	92.2481	92.1788
	48hrs_NALM6_500IL2_Experiment_Control_1-1C.fcs	1466	1061	439	4909	2.29178	58.0135	91.7913		_1-1	59.017	55.7803	58.0135	77.0497	75.2387	79.7703	86.5189	86.2069	86.8822	89.6863	90.4482	90.3152	92.9282	90.181	92.5028
	48hrs_NALM6_500IL2_Experiment_Control_1-2A.fcs	1755	1635	257	3575	1.669	51.7699	93.2933		_1-2	51.7699	54.9512	53.306	69.0458	69.1618	70.9526	79.4405	76.836	80.6059	85.625	87.5869	82.0063	88.4183	90.8353	88.6497
	48hrs_NALM6_500IL2_Experiment_Control_1-2B.fcs	1859	1524	282	3555	1.65966	54.9512	92.6505		_1-4	49.8187	49.602	52.2211	62.0866	64.0532	64.7097	65.5991	69.5613	72.0865	78.1331	80.9577	81.9094	84.3859	84.0111	87.6127
	48hrs_NALM6_500IL2_Experiment_Control_1-2C.fcs	1822	1596	268	3507	1.63725	53.306	92.9007
	48hrs_NALM6_500IL2_Experiment_Control_1-4A.fcs	2061	2076	162	2226	1.03922	49.8187	93.2161
	48hrs_NALM6_500IL2_Experiment_Control_1-4B.fcs	1994	2026	156	2203	1.02848	49.602	93.387		CAR-T to B tumor ratio		Cntrl T cells			WPRE T cells			LTR T cells			TCRA T cells			TCRB T cells
	48hrs_NALM6_500IL2_Experiment_Control_1-4C.fcs	2069	1893	157	2192	1.02334	52.2211	93.3163		_2-1	3.14566	2.86601	2.88936	1.81046	1.86975	1.88749	2.22222	2.23016	2.21289	2.48133	2.42484	2.43184	2.5943	2.69701	2.6592
	48hrs_NALM6_500IL2_Experiment_Control_2-1A.fcs	1243	478	469	6738	3.14566	72.2255	93.4924		_1-1	2.31746	2.33427	2.29178	0.902894	1.0084	1.0887	1.24136	1.41083	1.44164	1.6578	1.72082	1.72596	2.01821	2.05182	1.97246
	48hrs_NALM6_500IL2_Experiment_Control_2-1B.fcs	1319	456	971	6139	2.86601	74.3099	86.3432		_1-2	1.669	1.65966	1.63725	0.573763	0.549953	0.521008	0.644258	0.640523	0.637722	1.11064	1.07423	1.1774	1.32866	1.35434	1.44164
	48hrs_NALM6_500IL2_Experiment_Control_2-1C.fcs	1395	475	822	6189	2.88936	74.5989	88.2756		_1-4	1.03922	1.02848	1.02334	0.295985	0.3324	0.304855	0.390289	0.365546	0.40803	0.727358	0.728758	0.741363	0.983193	0.94958	0.86648
	Sample:	Lymphocytes/Single Cells/dead cells/NALM6_cells | Count	Lymphocytes/Single Cells/Live cells/NALM6_cells | Count	Lymphocytes/Single Cells/dead cells/CAR-T cells | Count	Lymphocytes/Single Cells/Live cells/CAR-T cells | Count
	48hrs_NALM6_500IL2_Experiment_WPRE_1-1A.fcs	2293	683	2205	1934	0.902894	77.0497	46.7263
	48hrs_NALM6_500IL2_Experiment_WPRE_1-1B.fcs	2206	726	1891	2160	1.0084	75.2387	53.3202
	48hrs_NALM6_500IL2_Experiment_WPRE_1-1C.fcs	2362	599	1597	2332	1.0887	79.7703	59.3535
	48hrs_NALM6_500IL2_Experiment_WPRE_1-2A.fcs	2699	1210	1192	1229	0.573763	69.0458	50.7641
	48hrs_NALM6_500IL2_Experiment_WPRE_1-2B.fcs	2624	1170	1276	1178	0.549953	69.1618	48.0033
	48hrs_NALM6_500IL2_Experiment_WPRE_1-2C.fcs	2726	1116	1298	1116	0.521008	70.9526	46.2303
	48hrs_NALM6_500IL2_Experiment_WPRE_1-4A.fcs	2910	1777	644	634	0.295985	62.0866	49.6088
	48hrs_NALM6_500IL2_Experiment_WPRE_1-4B.fcs	2892	1623	655	712	0.3324	64.0532	52.0849
	48hrs_NALM6_500IL2_Experiment_WPRE_1-4C.fcs	2987	1629	514	653	0.304855	64.7097	55.9554
	48hrs_NALM6_500IL2_Experiment_WPRE_2-1A.fcs	1575	182	2457	3878	1.81046	89.6414	61.2155
	48hrs_NALM6_500IL2_Experiment_WPRE_2-1B.fcs	1628	245	2076	4005	1.86975	86.9194	65.8609
	48hrs_NALM6_500IL2_Experiment_WPRE_2-1C.fcs	1670	229	1955	4043	1.88749	87.941	67.4058
	Sample:	Lymphocytes/Single Cells/dead cells/NALM6_cells | Count	Lymphocytes/Single Cells/Live cells/NALM6_cells | Count	Lymphocytes/Single Cells/dead cells/CAR-T cells | Count	Lymphocytes/Single Cells/Live cells/CAR-T cells | Count
	48hrs_NALM6_500IL2_Experiment_LTR_1-1A.fcs	2381	371	1827	2659	1.24136	86.5189	59.2733
	48hrs_NALM6_500IL2_Experiment_LTR_1-1B.fcs	2325	372	1542	3022	1.41083	86.2069	66.2138
	48hrs_NALM6_500IL2_Experiment_LTR_1-1C.fcs	2338	353	1304	3088	1.44164	86.8822	70.3097
	48hrs_NALM6_500IL2_Experiment_LTR_1-2A.fcs	2925	757	1441	1380	0.644258	79.4405	48.9188
	48hrs_NALM6_500IL2_Experiment_LTR_1-2B.fcs	2783	839	1345	1372	0.640523	76.836	50.4969
	48hrs_NALM6_500IL2_Experiment_LTR_1-2C.fcs	2980	717	1418	1366	0.637722	80.6059	49.0661
	48hrs_NALM6_500IL2_Experiment_LTR_1-4A.fcs	2847	1493	810	836	0.390289	65.5991	50.7898
	48hrs_NALM6_500IL2_Experiment_LTR_1-4B.fcs	3124	1367	747	783	0.365546	69.5613	51.1765
	48hrs_NALM6_500IL2_Experiment_LTR_1-4C.fcs	3099	1200	689	874	0.40803	72.0865	55.9181
	48hrs_NALM6_500IL2_Experiment_LTR_2-1A.fcs	1416	132	2033	4760	2.22222	91.4729	70.0721
	48hrs_NALM6_500IL2_Experiment_LTR_2-1B.fcs	1452	143	1889	4777	2.23016	91.0345	71.6622
	48hrs_NALM6_500IL2_Experiment_LTR_2-1C.fcs	1538	158	1742	4740	2.21289	90.684	73.1256
	Sample:	Lymphocytes/Single Cells/dead cells/NALM6_cells | Count	Lymphocytes/Single Cells/Live cells/NALM6_cells | Count	Lymphocytes/Single Cells/dead cells/CAR-T cells | Count	Lymphocytes/Single Cells/Live cells/CAR-T cells | Count
	48hrs_NALM6_500IL2_Experiment_TCRA_1-1A.fcs	1887	217	1832	3551	1.6578	89.6863	65.9669
	48hrs_NALM6_500IL2_Experiment_TCRA_1-1B.fcs	1998	211	1615	3686	1.72082	90.4482	69.5341
	48hrs_NALM6_500IL2_Experiment_TCRA_1-1C.fcs	1977	212	1448	3697	1.72596	90.3152	71.8562
	48hrs_NALM6_500IL2_Experiment_TCRA_1-2A.fcs	2466	414	1512	2379	1.11064	85.625	61.1411
	48hrs_NALM6_500IL2_Experiment_TCRA_1-2B.fcs	2519	357	1680	2301	1.07423	87.5869	57.7995
	48hrs_NALM6_500IL2_Experiment_TCRA_1-2C.fcs	2338	513	1424	2522	1.1774	82.0063	63.9128
	48hrs_NALM6_500IL2_Experiment_TCRA_1-4A.fcs	2712	759	1448	1558	0.727358	78.1331	51.8297
	48hrs_NALM6_500IL2_Experiment_TCRA_1-4B.fcs	2908	684	1299	1561	0.728758	80.9577	54.5804
	48hrs_NALM6_500IL2_Experiment_TCRA_1-4C.fcs	2857	631	1280	1588	0.741363	81.9094	55.3696
	48hrs_NALM6_500IL2_Experiment_TCRA_2-1A.fcs	976	98	1829	5315	2.48133	90.8752	74.3981
	48hrs_NALM6_500IL2_Experiment_TCRA_2-1B.fcs	1105	101	1750	5194	2.42484	91.6252	74.7984
	48hrs_NALM6_500IL2_Experiment_TCRA_2-1C.fcs	1163	126	1592	5209	2.43184	90.225	76.5917
	Sample:	Lymphocytes/Single Cells/dead cells/NALM6_cells | Count	Lymphocytes/Single Cells/Live cells/NALM6_cells | Count	Lymphocytes/Single Cells/dead cells/CAR-T cells | Count	Lymphocytes/Single Cells/Live cells/CAR-T cells | Count
	48hrs_NALM6_500IL2_Experiment_TCRB_1-1A.fcs	1682	128	1742	4323	2.01821	92.9282	71.2778
	48hrs_NALM6_500IL2_Experiment_TCRB_1-1B.fcs	1644	179	1492	4395	2.05182	90.181	74.656
	48hrs_NALM6_500IL2_Experiment_TCRB_1-1C.fcs	1678	136	1698	4225	1.97246	92.5028	71.3321
	48hrs_NALM6_500IL2_Experiment_TCRB_1-2A.fcs	2359	309	1816	2846	1.32866	88.4183	61.0468
	48hrs_NALM6_500IL2_Experiment_TCRB_1-2B.fcs	2349	237	1674	2901	1.35434	90.8353	63.4098
	48hrs_NALM6_500IL2_Experiment_TCRB_1-2C.fcs	2265	290	1515	3088	1.44164	88.6497	67.0867
	48hrs_NALM6_500IL2_Experiment_TCRB_1-4A.fcs	2659	492	1399	2106	0.983193	84.3859	60.0856
	48hrs_NALM6_500IL2_Experiment_TCRB_1-4B.fcs	2727	519	1324	2034	0.94958	84.0111	60.5718
	48hrs_NALM6_500IL2_Experiment_TCRB_1-4C.fcs	2914	412	1287	1856	0.86648	87.6127	59.0519
	48hrs_NALM6_500IL2_Experiment_TCRB_2-1A.fcs	890	73	1851	5557	2.5943	92.4195	75.0135
	48hrs_NALM6_500IL2_Experiment_TCRB_2-1B.fcs	952	80	1682	5777	2.69701	92.2481	77.4501
	48hrs_NALM6_500IL2_Experiment_TCRB_2-1C.fcs	990	84	1617	5696	2.6592	92.1788	77.8887

## Sheet: N-72hrs
						Normalized live T cells	NALM6 dead %	CAR-T cells live %
	Sample:	Lymphocytes/Single Cells/dead cells/NALM6_cells | Count	Lymphocytes/Single Cells/Live cells/NALM6_cells | Count	Lymphocytes/Single Cells/dead cells/CAR-T cells | Count	Lymphocytes/Single Cells/Live cells/CAR-T cells | Count	(to 1:1 WPRE)
	72hrs_NALM6_500IL2_Experiment_Control_1-1A.fcs	1965	455	560	4973	0.875271	81.1983	89.8789		CAR-T to B tumor ratio		Control			WPRE			LTR			TCRA			TCRB
	72hrs_NALM6_500IL2_Experiment_Control_1-1B.fcs	1891	383	587	5125	0.902024	83.1574	89.7234		_2-1	89.9794	88.9877	87.1058	96.0756	96.1165	95.9854	97.7496	96.2213	95.8775	96.1759	97.4446	95.9866	95.8498	95.5277	95.3488
	72hrs_NALM6_500IL2_Experiment_Control_1-1C.fcs	1851	474	569	5070	0.892344	79.6129	89.9096		_1-1	81.1983	83.1574	79.6129	94.5946	94.8694	95.3177	95.8075	95.8873	95.9418	95.7286	95.9016	96.0512	95.9184	95.7731	96.1798
	72hrs_NALM6_500IL2_Experiment_Control_1-2A.fcs	2360	782	342	3586	0.631153	75.1114	91.2933		_1-2	75.1114	76.1474	77.3664	93.617	94.4444	93.4055	95.1175	95.0334	95.8596	96.875	96.1659	96.3333	97.048	97.8348	96.0579
	72hrs_NALM6_500IL2_Experiment_Control_1-2B.fcs	2356	738	362	3516	0.618833	76.1474	90.6653		_1-4	71.084	68.5665	70.462	89.1475	90.4959	89.6167	90.6691	91.616	88.2042	95.338	95.4463	93.7843	95.9268	96.2649	96.0993
	72hrs_NALM6_500IL2_Experiment_Control_1-2C.fcs	2403	703	400	3623	0.637665	77.3664	90.0572
	72hrs_NALM6_500IL2_Experiment_Control_1-4A.fcs	2800	1139	173	2239	0.394075	71.084	92.8275
	72hrs_NALM6_500IL2_Experiment_Control_1-4B.fcs	2755	1263	250	2327	0.409563	68.5665	90.2988		CAR-T to B tumor ratio		Cntrl T cells			WPRE T cells			LTR T cells			TCRA T cells			TCRB T cells
	72hrs_NALM6_500IL2_Experiment_Control_1-4C.fcs	2593	1087	220	2352	0.413963	70.462	91.4463		_2-1	1.13065	1.16867	1.17307	1.19701	1.15195	1.19859	1.18557	1.15283	1.1787	1.20634	1.17941	1.20106	1.19595	1.16427	1.19155
	72hrs_NALM6_500IL2_Experiment_Control_2-1A.fcs	1311	146	1073	6424	1.13065	89.9794	85.6876		_1-1	0.875271	0.902024	0.892344	0.998651	0.992842	1.00851	1.00446	1.00833	1.01555	1.17166	1.15477	1.11781	1.11358	1.09739	1.08771
	72hrs_NALM6_500IL2_Experiment_Control_2-1B.fcs	1301	161	786	6640	1.16867	88.9877	89.4156		_1-2	0.631153	0.618833	0.637665	0.688002	0.693634	0.704723	0.658962	0.65861	0.632913	0.983338	0.971898	0.985626	0.927017	0.974186	0.960458
	72hrs_NALM6_500IL2_Experiment_Control_2-1C.fcs	1243	184	765	6665	1.17307	87.1058	89.7039		_1-4	0.394075	0.409563	0.413963	0.389498	0.378058	0.432972	0.336873	0.389674	0.365386	0.810502	0.811558	0.820886	0.789733	0.772133	0.802757
	Sample:	Lymphocytes/Single Cells/dead cells/NALM6_cells | Count	Lymphocytes/Single Cells/Live cells/NALM6_cells | Count	Lymphocytes/Single Cells/dead cells/CAR-T cells | Count	Lymphocytes/Single Cells/Live cells/CAR-T cells | Count
	72hrs_NALM6_500IL2_Experiment_WPRE_1-1A.fcs	1085	62	1559	5674	0.998651	94.5946	78.446
	72hrs_NALM6_500IL2_Experiment_WPRE_1-1B.fcs	1017	55	1684	5641	0.992842	94.8694	77.0102
	72hrs_NALM6_500IL2_Experiment_WPRE_1-1C.fcs	1140	56	1568	5730	1.00851	95.3177	78.5147
	72hrs_NALM6_500IL2_Experiment_WPRE_1-2A.fcs	1892	129	1635	3909	0.688002	93.617	70.5087
	72hrs_NALM6_500IL2_Experiment_WPRE_1-2B.fcs	1921	113	1665	3941	0.693634	94.4444	70.2997
	72hrs_NALM6_500IL2_Experiment_WPRE_1-2C.fcs	1898	134	1574	4004	0.704723	93.4055	71.782
	72hrs_NALM6_500IL2_Experiment_WPRE_1-4A.fcs	2719	331	1453	2213	0.389498	89.1475	60.3655
	72hrs_NALM6_500IL2_Experiment_WPRE_1-4B.fcs	2628	276	1539	2148	0.378058	90.4959	58.2587
	72hrs_NALM6_500IL2_Experiment_WPRE_1-4C.fcs	2572	298	1155	2460	0.432972	89.6167	68.0498
	72hrs_NALM6_500IL2_Experiment_WPRE_2-1A.fcs	661	27	1449	6801	1.19701	96.0756	82.4364
	72hrs_NALM6_500IL2_Experiment_WPRE_2-1B.fcs	792	32	1492	6545	1.15195	96.1165	81.4359
	72hrs_NALM6_500IL2_Experiment_WPRE_2-1C.fcs	789	33	1259	6810	1.19859	95.9854	84.3971
	Sample:	Lymphocytes/Single Cells/dead cells/NALM6_cells | Count	Lymphocytes/Single Cells/Live cells/NALM6_cells | Count	Lymphocytes/Single Cells/dead cells/CAR-T cells | Count	Lymphocytes/Single Cells/Live cells/CAR-T cells | Count
	72hrs_NALM6_500IL2_Experiment_LTR_1-1A.fcs	1234	54	1481	5707	1.00446	95.8075	79.3962
	72hrs_NALM6_500IL2_Experiment_LTR_1-1B.fcs	1259	54	1389	5729	1.00833	95.8873	80.4861
	72hrs_NALM6_500IL2_Experiment_LTR_1-1C.fcs	1253	53	1447	5770	1.01555	95.9418	79.9501
	72hrs_NALM6_500IL2_Experiment_LTR_1-2A.fcs	2104	108	1621	3744	0.658962	95.1175	69.7856
	72hrs_NALM6_500IL2_Experiment_LTR_1-2B.fcs	1990	104	1796	3742	0.65861	95.0334	67.5695
	72hrs_NALM6_500IL2_Experiment_LTR_1-2C.fcs	2130	92	1641	3596	0.632913	95.8596	68.6653
	72hrs_NALM6_500IL2_Experiment_LTR_1-4A.fcs	2954	304	1384	1914	0.336873	90.6691	58.0352
	72hrs_NALM6_500IL2_Experiment_LTR_1-4B.fcs	2863	262	1418	2214	0.389674	91.616	60.9581
	72hrs_NALM6_500IL2_Experiment_LTR_1-4C.fcs	2834	379	1082	2076	0.365386	88.2042	65.7378
	72hrs_NALM6_500IL2_Experiment_LTR_2-1A.fcs	695	16	1489	6736	1.18557	97.7496	81.8967
	72hrs_NALM6_500IL2_Experiment_LTR_2-1B.fcs	713	28	1498	6550	1.15283	96.2213	81.3867
	72hrs_NALM6_500IL2_Experiment_LTR_2-1C.fcs	814	35	1269	6697	1.1787	95.8775	84.0698
	Sample:	Lymphocytes/Single Cells/dead cells/NALM6_cells | Count	Lymphocytes/Single Cells/Live cells/NALM6_cells | Count	Lymphocytes/Single Cells/dead cells/CAR-T cells | Count	Lymphocytes/Single Cells/Live cells/CAR-T cells | Count
	72hrs_NALM6_500IL2_Experiment_TCRA_1-1A.fcs	762	34	1325	6657	1.17166	95.7286	83.4002
	72hrs_NALM6_500IL2_Experiment_TCRA_1-1B.fcs	819	35	1394	6561	1.15477	95.9016	82.4764
	72hrs_NALM6_500IL2_Experiment_TCRA_1-1C.fcs	900	37	1447	6351	1.11781	96.0512	81.444
	72hrs_NALM6_500IL2_Experiment_TCRA_1-2A.fcs	1209	39	1535	5587	0.983338	96.875	78.4471
	72hrs_NALM6_500IL2_Experiment_TCRA_1-2B.fcs	1229	49	1570	5522	0.971898	96.1659	77.8624
	72hrs_NALM6_500IL2_Experiment_TCRA_1-2C.fcs	1156	44	1538	5600	0.985626	96.3333	78.4533
	72hrs_NALM6_500IL2_Experiment_TCRA_1-4A.fcs	1636	80	1641	4605	0.810502	95.338	73.7272
	72hrs_NALM6_500IL2_Experiment_TCRA_1-4B.fcs	1572	75	1672	4611	0.811558	95.4463	73.3885
	72hrs_NALM6_500IL2_Experiment_TCRA_1-4C.fcs	1539	102	1611	4664	0.820886	93.7843	74.3267
	72hrs_NALM6_500IL2_Experiment_TCRA_2-1A.fcs	503	20	1517	6854	1.20634	96.1759	81.8779
	72hrs_NALM6_500IL2_Experiment_TCRA_2-1B.fcs	572	15	1475	6701	1.17941	97.4446	81.9594
	72hrs_NALM6_500IL2_Experiment_TCRA_2-1C.fcs	574	24	1377	6824	1.20106	95.9866	83.2094
	Sample:	Lymphocytes/Single Cells/dead cells/NALM6_cells | Count	Lymphocytes/Single Cells/Live cells/NALM6_cells | Count	Lymphocytes/Single Cells/dead cells/CAR-T cells | Count	Lymphocytes/Single Cells/Live cells/CAR-T cells | Count
	72hrs_NALM6_500IL2_Experiment_TCRB_1-1A.fcs	799	34	1502	6327	1.11358	95.9184	80.8149
	72hrs_NALM6_500IL2_Experiment_TCRB_1-1B.fcs	861	38	1504	6235	1.09739	95.7731	80.566
	72hrs_NALM6_500IL2_Experiment_TCRB_1-1C.fcs	856	34	1500	6180	1.08771	96.1798	80.4688
	72hrs_NALM6_500IL2_Experiment_TCRB_1-2A.fcs	1315	40	1613	5267	0.927017	97.048	76.5552
	72hrs_NALM6_500IL2_Experiment_TCRB_1-2B.fcs	1220	27	1491	5535	0.974186	97.8348	78.7788
	72hrs_NALM6_500IL2_Experiment_TCRB_1-2C.fcs	1194	49	1599	5457	0.960458	96.0579	77.3384
	72hrs_NALM6_500IL2_Experiment_TCRB_1-4A.fcs	1625	69	1526	4487	0.789733	95.9268	74.6217
	72hrs_NALM6_500IL2_Experiment_TCRB_1-4B.fcs	1701	66	1696	4387	0.772133	96.2649	72.119
	72hrs_NALM6_500IL2_Experiment_TCRB_1-4C.fcs	1626	66	1565	4561	0.802757	96.0993	74.4532
	72hrs_NALM6_500IL2_Experiment_TCRB_2-1A.fcs	485	21	1623	6795	1.19595	95.8498	80.7199
	72hrs_NALM6_500IL2_Experiment_TCRB_2-1B.fcs	534	25	1620	6615	1.16427	95.5277	80.3279
	72hrs_NALM6_500IL2_Experiment_TCRB_2-1C.fcs	533	26	1515	6770	1.19155	95.3488	81.7139

## Sheet: J-24hrs
						Normalized live T cells	NALM6 dead %	CAR-T cells live %
	Sample:	Lymphocytes/Single Cells/dead cells/NALM6_cells | Count	Lymphocytes/Single Cells/Live cells/NALM6_cells | Count	Lymphocytes/Single Cells/dead cells/CAR-T cells | Count	Lymphocytes/Single Cells/Live cells/CAR-T cells | Count	(to 1:1 WPRE)
	24hrs_Jeko1_500IL2_Experiment_Control_1-1A.fcs	862	2097	542	4674	1.89563	29.1315	89.6089		CAR-T to B tumor ratio		Control			WPRE			LTR			TCRA			TCRB
	24hrs_Jeko1_500IL2_Experiment_Control_1-1B.fcs	971	1956	661	4498	1.82425	33.1739	87.1874		_2-1	31.672	22.8886	29.9313	43.894	40.1156	42.7657	45.723	41.294	41.4512	42.5369	42.2992	45.3167	45.0789	40.4542	49.6928
	24hrs_Jeko1_500IL2_Experiment_Control_1-1C.fcs	920	2073	415	4748	1.92565	30.7384	91.962		_1-1	29.1315	33.1739	30.7384	45.8182	47.8586	47.0795	44.111	46.4803	47.2886	46.6013	46.2261	51.4655	47.0611	49.0852	54.1308
	24hrs_Jeko1_500IL2_Experiment_Control_1-2A.fcs	1485	2786	295	3143	1.27471	34.7694	91.4194		_1-2	34.7694	24.6262	24.9251	60.277	55.6428	56.6348	55.1082	52.0339	55.8324	59.034	56.9747	62.0743	62.8786	59.0177	62.1478
	24hrs_Jeko1_500IL2_Experiment_Control_1-2B.fcs	1054	3226	248	3141	1.27389	24.6262	92.6822		_1-4	20.47	22.3189	26.18	49.0324	48.93	56.0706	48.0561	50.2316	54.7208	63.3362	65.5921	72.0025	65.9131	64.0548	68.9816
	24hrs_Jeko1_500IL2_Experiment_Control_1-2C.fcs	1081	3256	241	3101	1.25767	24.9251	92.7887
	24hrs_Jeko1_500IL2_Experiment_Control_1-4A.fcs	1054	4095	137	1841	0.746654	20.47	93.0738
	24hrs_Jeko1_500IL2_Experiment_Control_1-4B.fcs	1180	4107	122	1748	0.708936	22.3189	93.4759		CAR-T to B tumor ratio		Cntrl T cells			WPRE T cells			LTR T cells			TCRA T cells			TCRB T cells
	24hrs_Jeko1_500IL2_Experiment_Control_1-4C.fcs	1309	3691	146	1824	0.739759	26.18	92.5888		_2-1	2.41273	2.55185	2.54738	2.01284	2.02014	1.8932	2.13938	2.17588	2.12965	2.36123	2.3592	2.31702	2.46749	2.55347	2.44477
	24hrs_Jeko1_500IL2_Experiment_Control_2-1A.fcs	591	1275	855	5949	2.41273	31.672	87.4339		_1-1	1.89563	1.82425	1.92565	1.07395	0.981073	0.944978	1.25037	1.20454	1.19359	1.63972	1.54198	1.53589	1.81695	1.6965	1.62512
	24hrs_Jeko1_500IL2_Experiment_Control_2-1B.fcs	458	1543	622	6292	2.55185	22.8886	91.0038		_1-2	1.27471	1.27389	1.25767	0.729215	0.573881	0.603893	0.719886	0.740165	0.752738	1.11207	1.0561	1.17656	1.30269	1.20657	1.25118
	24hrs_Jeko1_500IL2_Experiment_Control_2-1C.fcs	566	1325	607	6281	2.54738	29.9313	91.1876		_1-4	0.746654	0.708936	0.739759	0.30945	0.290794	0.293227	0.393808	0.377586	0.379613	0.803028	0.700419	0.745437	0.915777	0.931594	0.916182
	Sample:	Lymphocytes/Single Cells/dead cells/NALM6_cells | Count	Lymphocytes/Single Cells/Live cells/NALM6_cells | Count	Lymphocytes/Single Cells/dead cells/CAR-T cells | Count	Lymphocytes/Single Cells/Live cells/CAR-T cells | Count
	24hrs_Jeko1_500IL2_Experiment_WPRE_1-1A.fcs	2016	2384	630	2648	1.07395	45.8182	80.781
	24hrs_Jeko1_500IL2_Experiment_WPRE_1-1B.fcs	2179	2374	536	2419	0.981073	47.8586	81.8613
	24hrs_Jeko1_500IL2_Experiment_WPRE_1-1C.fcs	2144	2410	571	2330	0.944978	47.0795	80.3171
	24hrs_Jeko1_500IL2_Experiment_WPRE_1-2A.fcs	3047	2008	336	1798	0.729215	60.277	84.2549
	24hrs_Jeko1_500IL2_Experiment_WPRE_1-2B.fcs	2904	2315	373	1415	0.573881	55.6428	79.1387
	24hrs_Jeko1_500IL2_Experiment_WPRE_1-2C.fcs	3026	2317	366	1489	0.603893	56.6348	80.2695
	24hrs_Jeko1_500IL2_Experiment_WPRE_1-4A.fcs	2863	2976	168	763	0.30945	49.0324	81.9549
	24hrs_Jeko1_500IL2_Experiment_WPRE_1-4B.fcs	2881	3007	170	717	0.290794	48.93	80.8343
	24hrs_Jeko1_500IL2_Experiment_WPRE_1-4C.fcs	3145	2464	171	723	0.293227	56.0706	80.8725
	24hrs_Jeko1_500IL2_Experiment_WPRE_2-1A.fcs	1143	1461	915	4963	2.01284	43.894	84.4335
	24hrs_Jeko1_500IL2_Experiment_WPRE_2-1B.fcs	1110	1657	753	4981	2.02014	40.1156	86.8678
	24hrs_Jeko1_500IL2_Experiment_WPRE_2-1C.fcs	1203	1610	779	4668	1.8932	42.7657	85.6985
	Sample:	Lymphocytes/Single Cells/dead cells/NALM6_cells | Count	Lymphocytes/Single Cells/Live cells/NALM6_cells | Count	Lymphocytes/Single Cells/dead cells/CAR-T cells | Count	Lymphocytes/Single Cells/Live cells/CAR-T cells | Count
	24hrs_Jeko1_500IL2_Experiment_LTR_1-1A.fcs	1764	2235	717	3083	1.25037	44.111	81.1316
	24hrs_Jeko1_500IL2_Experiment_LTR_1-1B.fcs	1829	2106	694	2970	1.20454	46.4803	81.059
	24hrs_Jeko1_500IL2_Experiment_LTR_1-1C.fcs	1840	2051	727	2943	1.19359	47.2886	80.1907
	24hrs_Jeko1_500IL2_Experiment_LTR_1-2A.fcs	2573	2096	423	1775	0.719886	55.1082	80.7552
	24hrs_Jeko1_500IL2_Experiment_LTR_1-2B.fcs	2456	2264	439	1825	0.740165	52.0339	80.6095
	24hrs_Jeko1_500IL2_Experiment_LTR_1-2C.fcs	2599	2056	431	1856	0.752738	55.8324	81.1544
	24hrs_Jeko1_500IL2_Experiment_LTR_1-4A.fcs	2707	2926	162	971	0.393808	48.0561	85.7017
	24hrs_Jeko1_500IL2_Experiment_LTR_1-4B.fcs	2819	2793	177	931	0.377586	50.2316	84.0253
	24hrs_Jeko1_500IL2_Experiment_LTR_1-4C.fcs	2950	2441	185	936	0.379613	54.7208	83.4969
	24hrs_Jeko1_500IL2_Experiment_LTR_2-1A.fcs	1053	1250	1009	5275	2.13938	45.723	83.9433
	24hrs_Jeko1_500IL2_Experiment_LTR_2-1B.fcs	951	1352	963	5365	2.17588	41.294	84.7819
	24hrs_Jeko1_500IL2_Experiment_LTR_2-1C.fcs	994	1404	835	5251	2.12965	41.4512	86.28
	Sample:	Lymphocytes/Single Cells/dead cells/NALM6_cells | Count	Lymphocytes/Single Cells/Live cells/NALM6_cells | Count	Lymphocytes/Single Cells/dead cells/CAR-T cells | Count	Lymphocytes/Single Cells/Live cells/CAR-T cells | Count
	24hrs_Jeko1_500IL2_Experiment_TCRA_1-1A.fcs	1474	1689	883	4043	1.63972	46.6013	82.0747
	24hrs_Jeko1_500IL2_Experiment_TCRA_1-1B.fcs	1476	1717	869	3802	1.54198	46.2261	81.3958
	24hrs_Jeko1_500IL2_Experiment_TCRA_1-1C.fcs	1633	1540	769	3787	1.53589	51.4655	83.1212
	24hrs_Jeko1_500IL2_Experiment_TCRA_1-2A.fcs	2310	1603	603	2742	1.11207	59.034	81.9731
	24hrs_Jeko1_500IL2_Experiment_TCRA_1-2B.fcs	2275	1718	710	2604	1.0561	56.9747	78.5757
	24hrs_Jeko1_500IL2_Experiment_TCRA_1-2C.fcs	2406	1470	675	2901	1.17656	62.0743	81.1242
	24hrs_Jeko1_500IL2_Experiment_TCRA_1-4A.fcs	2916	1688	466	1980	0.803028	63.3362	80.9485
	24hrs_Jeko1_500IL2_Experiment_TCRA_1-4B.fcs	3052	1601	490	1727	0.700419	65.5921	77.8981
	24hrs_Jeko1_500IL2_Experiment_TCRA_1-4C.fcs	3405	1324	415	1838	0.745437	72.0025	81.5801
	24hrs_Jeko1_500IL2_Experiment_TCRA_2-1A.fcs	721	974	1072	5822	2.36123	42.5369	84.4502
	24hrs_Jeko1_500IL2_Experiment_TCRA_2-1B.fcs	769	1049	913	5817	2.3592	42.2992	86.4339
	24hrs_Jeko1_500IL2_Experiment_TCRA_2-1C.fcs	837	1010	940	5713	2.31702	45.3167	85.871
	Sample:	Lymphocytes/Single Cells/dead cells/NALM6_cells | Count	Lymphocytes/Single Cells/Live cells/NALM6_cells | Count	Lymphocytes/Single Cells/dead cells/CAR-T cells | Count	Lymphocytes/Single Cells/Live cells/CAR-T cells | Count
	24hrs_Jeko1_500IL2_Experiment_TCRB_1-1A.fcs	1193	1342	1116	4480	1.81695	47.0611	80.0572
	24hrs_Jeko1_500IL2_Experiment_TCRB_1-1B.fcs	1395	1447	966	4183	1.6965	49.0852	81.2391
	24hrs_Jeko1_500IL2_Experiment_TCRB_1-1C.fcs	1448	1227	1100	4007	1.62512	54.1308	78.4609
	24hrs_Jeko1_500IL2_Experiment_TCRB_1-2A.fcs	2097	1238	825	3212	1.30269	62.8786	79.564
	24hrs_Jeko1_500IL2_Experiment_TCRB_1-2B.fcs	2163	1502	865	2975	1.20657	59.0177	77.474
	24hrs_Jeko1_500IL2_Experiment_TCRB_1-2C.fcs	2228	1357	772	3085	1.25118	62.1478	79.9844
	24hrs_Jeko1_500IL2_Experiment_TCRB_1-4A.fcs	2624	1357	787	2258	0.915777	65.9131	74.1544
	24hrs_Jeko1_500IL2_Experiment_TCRB_1-4B.fcs	2714	1523	585	2297	0.931594	64.0548	79.7016
	24hrs_Jeko1_500IL2_Experiment_TCRB_1-4C.fcs	2960	1331	524	2259	0.916182	68.9816	81.1714
	24hrs_Jeko1_500IL2_Experiment_TCRB_2-1A.fcs	600	731	1243	6084	2.46749	45.0789	83.0353
	24hrs_Jeko1_500IL2_Experiment_TCRB_2-1B.fcs	570	839	987	6296	2.55347	40.4542	86.4479
	24hrs_Jeko1_500IL2_Experiment_TCRB_2-1C.fcs	728	737	1077	6028	2.44477	49.6928	84.8417

## Sheet: J-48hrs
						Normalized live T cells	NALM6 dead %	CAR-T cells live %
	Sample:	Lymphocytes/Single Cells/dead cells/NALM6_cells | Count	Lymphocytes/Single Cells/Live cells/NALM6_cells | Count	Lymphocytes/Single Cells/dead cells/CAR-T cells | Count	Lymphocytes/Single Cells/Live cells/CAR-T cells | Count	(to 1:1 WPRE)
	48hrs_Jeko1_500IL2_Experiment_Control_1-1A.fcs	1867	521	764	4798	1.27313	78.1826	86.2639		CAR-T to B tumor ratio		Control			WPRE			LTR			TCRA			TCRB
	48hrs_Jeko1_500IL2_Experiment_Control_1-1B.fcs	1816	505	604	4992	1.32461	78.2421	89.2066		_2-1	66.3273	65.5271	66.6667	63.7491	59.8718	61.084	64.7736	60.091	63.1289	68.9352	62.9328	64.2358	66.6667	71.4829	69.2636
	48hrs_Jeko1_500IL2_Experiment_Control_1-1C.fcs	1948	481	662	4842	1.2848	80.1976	87.9724		_1-1	78.1826	78.2421	80.1976	61.8549	63.1703	64.6426	65.7441	67.0903	74.7871	65.1435	67.8508	61.7458	71.0826	73.4058	70.5846
	48hrs_Jeko1_500IL2_Experiment_Control_1-2A.fcs	2182	1191	403	3600	0.955245	64.6902	89.9326		_1-2	64.6902	64.7311	69.936	70.1186	69.1817	73.4596	67.8054	73.2255	74.8433	73.6296	68.3868	69.9501	73.3594	74.7837	75.3312
	48hrs_Jeko1_500IL2_Experiment_Control_1-2B.fcs	2118	1154	416	3623	0.961348	64.7311	89.7004		_1-4	62.8471	65.4011	65.4583	75.1478	79.295	84.0924	79.3088	80.6987	85.9179	73.8481	81.0731	84.102	83.4555	81.5029	86.0717
	48hrs_Jeko1_500IL2_Experiment_Control_1-2C.fcs	2296	987	404	3552	0.942508	69.936	89.7877
	48hrs_Jeko1_500IL2_Experiment_Control_1-4A.fcs	2512	1485	220	2378	0.630992	62.8471	91.5319
	48hrs_Jeko1_500IL2_Experiment_Control_1-4B.fcs	2446	1294	234	2422	0.642668	65.4011	91.1898		CAR-T to B tumor ratio		Cntrl T cells			WPRE T cells			LTR T cells			TCRA T cells			TCRB T cells
	48hrs_Jeko1_500IL2_Experiment_Control_1-4C.fcs	2564	1353	291	2438	0.646913	65.4583	89.3368		_2-1	1.81337	1.7871	1.81443	1.53211	1.54644	1.44799	1.59659	1.55997	1.52521	1.68707	1.66239	1.65655	1.78843	1.72926	1.69556
	48hrs_Jeko1_500IL2_Experiment_Control_2-1A.fcs	847	430	774	6834	1.81337	66.3273	89.8265		_1-1	1.27313	1.32461	1.2848	1.02211	0.999558	0.97833	1.1455	1.05183	1.00778	1.35857	1.28295	1.29675	1.42305	1.39678	1.31744
	48hrs_Jeko1_500IL2_Experiment_Control_2-1B.fcs	920	484	664	6735	1.7871	65.5271	91.0258		_1-2	0.955245	0.961348	0.942508	0.619848	0.619317	0.637095	0.652751	0.64824	0.666283	0.876437	0.961083	0.976738	0.95551	0.953122	1.02875
	48hrs_Jeko1_500IL2_Experiment_Control_2-1C.fcs	892	446	630	6838	1.81443	66.6667	91.564		_1-4	0.630992	0.642668	0.646913	0.378118	0.37626	0.415532	0.303025	0.378914	0.378383	0.715372	0.747214	0.840881	0.711658	0.750133	0.818327
	Sample:	Lymphocytes/Single Cells/dead cells/NALM6_cells | Count	Lymphocytes/Single Cells/Live cells/NALM6_cells | Count	Lymphocytes/Single Cells/dead cells/CAR-T cells | Count	Lymphocytes/Single Cells/Live cells/CAR-T cells | Count
	48hrs_Jeko1_500IL2_Experiment_WPRE_1-1A.fcs	1594	983	1117	3852	1.02211	61.8549	77.5206
	48hrs_Jeko1_500IL2_Experiment_WPRE_1-1B.fcs	1614	941	1187	3767	0.999558	63.1703	76.0396
	48hrs_Jeko1_500IL2_Experiment_WPRE_1-1C.fcs	1682	920	1210	3687	0.97833	64.6426	75.291
	48hrs_Jeko1_500IL2_Experiment_WPRE_1-2A.fcs	2661	1134	755	2336	0.619848	70.1186	75.5742
	48hrs_Jeko1_500IL2_Experiment_WPRE_1-2B.fcs	2604	1160	763	2334	0.619317	69.1817	75.3633
	48hrs_Jeko1_500IL2_Experiment_WPRE_1-2C.fcs	2754	995	860	2401	0.637095	73.4596	73.6277
	48hrs_Jeko1_500IL2_Experiment_WPRE_1-4A.fcs	3432	1135	456	1425	0.378118	75.1478	75.7576
	48hrs_Jeko1_500IL2_Experiment_WPRE_1-4B.fcs	3554	928	456	1418	0.37626	79.295	75.667
	48hrs_Jeko1_500IL2_Experiment_WPRE_1-4C.fcs	3785	716	574	1566	0.415532	84.0924	73.1776
	48hrs_Jeko1_500IL2_Experiment_WPRE_2-1A.fcs	925	526	1197	5774	1.53211	63.7491	82.8289
	48hrs_Jeko1_500IL2_Experiment_WPRE_2-1B.fcs	934	626	1111	5828	1.54644	59.8718	83.989
	48hrs_Jeko1_500IL2_Experiment_WPRE_2-1C.fcs	1003	639	1163	5457	1.44799	61.084	82.432
	Sample:	Lymphocytes/Single Cells/dead cells/NALM6_cells | Count	Lymphocytes/Single Cells/Live cells/NALM6_cells | Count	Lymphocytes/Single Cells/dead cells/CAR-T cells | Count	Lymphocytes/Single Cells/Live cells/CAR-T cells | Count
	48hrs_Jeko1_500IL2_Experiment_LTR_1-1A.fcs	1449	755	1270	4317	1.1455	65.7441	77.2687
	48hrs_Jeko1_500IL2_Experiment_LTR_1-1B.fcs	1531	751	1278	3964	1.05183	67.0903	75.62
	48hrs_Jeko1_500IL2_Experiment_LTR_1-1C.fcs	1756	592	1262	3798	1.00778	74.7871	75.0593
	48hrs_Jeko1_500IL2_Experiment_LTR_1-2A.fcs	2342	1112	861	2460	0.652751	67.8054	74.0741
	48hrs_Jeko1_500IL2_Experiment_LTR_1-2B.fcs	2445	894	873	2443	0.64824	73.2255	73.6731
	48hrs_Jeko1_500IL2_Experiment_LTR_1-2C.fcs	2627	883	929	2511	0.666283	74.8433	72.9942
	48hrs_Jeko1_500IL2_Experiment_LTR_1-4A.fcs	3442	898	660	1142	0.303025	79.3088	63.374
	48hrs_Jeko1_500IL2_Experiment_LTR_1-4B.fcs	3257	779	580	1428	0.378914	80.6987	71.1155
	48hrs_Jeko1_500IL2_Experiment_LTR_1-4C.fcs	3557	583	746	1426	0.378383	85.9179	65.6538
	48hrs_Jeko1_500IL2_Experiment_LTR_2-1A.fcs	844	459	1337	6017	1.59659	64.7736	81.8194
	48hrs_Jeko1_500IL2_Experiment_LTR_2-1B.fcs	792	526	1265	5879	1.55997	60.091	82.2928
	48hrs_Jeko1_500IL2_Experiment_LTR_2-1C.fcs	916	535	1185	5748	1.52521	63.1289	82.9078
	Sample:	Lymphocytes/Single Cells/dead cells/NALM6_cells | Count	Lymphocytes/Single Cells/Live cells/NALM6_cells | Count	Lymphocytes/Single Cells/dead cells/CAR-T cells | Count	Lymphocytes/Single Cells/Live cells/CAR-T cells | Count
	48hrs_Jeko1_500IL2_Experiment_TCRA_1-1A.fcs	1112	595	1282	5120	1.35857	65.1435	79.975
	48hrs_Jeko1_500IL2_Experiment_TCRA_1-1B.fcs	1146	543	1445	4835	1.28295	67.8508	76.9904
	48hrs_Jeko1_500IL2_Experiment_TCRA_1-1C.fcs	1054	653	1343	4887	1.29675	61.7458	78.443
	48hrs_Jeko1_500IL2_Experiment_TCRA_1-2A.fcs	1773	635	1554	3303	0.876437	73.6296	68.0049
	48hrs_Jeko1_500IL2_Experiment_TCRA_1-2B.fcs	1683	778	1311	3622	0.961083	68.3868	73.4239
	48hrs_Jeko1_500IL2_Experiment_TCRA_1-2C.fcs	1683	723	1382	3681	0.976738	69.9501	72.7039
	48hrs_Jeko1_500IL2_Experiment_TCRA_1-4A.fcs	2324	823	1038	2696	0.715372	73.8481	72.2014
	48hrs_Jeko1_500IL2_Experiment_TCRA_1-4B.fcs	2463	575	1123	2816	0.747214	81.0731	71.4902
	48hrs_Jeko1_500IL2_Experiment_TCRA_1-4C.fcs	2407	455	1202	3169	0.840881	84.102	72.5006
	48hrs_Jeko1_500IL2_Experiment_TCRA_2-1A.fcs	628	283	1386	6358	1.68707	68.9352	82.1023
	48hrs_Jeko1_500IL2_Experiment_TCRA_2-1B.fcs	618	364	1279	6265	1.66239	62.9328	83.0461
	48hrs_Jeko1_500IL2_Experiment_TCRA_2-1C.fcs	643	358	1212	6243	1.65655	64.2358	83.7425
	Sample:	Lymphocytes/Single Cells/dead cells/NALM6_cells | Count	Lymphocytes/Single Cells/Live cells/NALM6_cells | Count	Lymphocytes/Single Cells/dead cells/CAR-T cells | Count	Lymphocytes/Single Cells/Live cells/CAR-T cells | Count
	48hrs_Jeko1_500IL2_Experiment_TCRB_1-1A.fcs	998	406	1337	5363	1.42305	71.0826	80.0448
	48hrs_Jeko1_500IL2_Experiment_TCRB_1-1B.fcs	1013	367	1419	5264	1.39678	73.4058	78.767
	48hrs_Jeko1_500IL2_Experiment_TCRB_1-1C.fcs	1135	473	1368	4965	1.31744	70.5846	78.3989
	48hrs_Jeko1_500IL2_Experiment_TCRB_1-2A.fcs	1688	613	1252	3601	0.95551	73.3594	74.2015
	48hrs_Jeko1_500IL2_Experiment_TCRB_1-2B.fcs	1729	583	1226	3592	0.953122	74.7837	74.5538
	48hrs_Jeko1_500IL2_Experiment_TCRB_1-2C.fcs	1649	540	1344	3877	1.02875	75.3312	74.2578
	48hrs_Jeko1_500IL2_Experiment_TCRB_1-4A.fcs	2391	474	1137	2682	0.711658	83.4555	70.2278
	48hrs_Jeko1_500IL2_Experiment_TCRB_1-4B.fcs	2256	512	1151	2827	0.750133	81.5029	71.0659
	48hrs_Jeko1_500IL2_Experiment_TCRB_1-4C.fcs	2064	334	1478	3084	0.818327	86.0717	67.6019
	48hrs_Jeko1_500IL2_Experiment_TCRB_2-1A.fcs	524	262	1288	6740	1.78843	66.6667	83.9562
	48hrs_Jeko1_500IL2_Experiment_TCRB_2-1B.fcs	564	225	1290	6517	1.72926	71.4829	83.4764
	48hrs_Jeko1_500IL2_Experiment_TCRB_2-1C.fcs	649	288	1278	6390	1.69556	69.2636	83.3333

## Sheet: J-72hrs
						Normalized live T cells	NALM6 dead %	CAR-T cells live %
	Sample:	Lymphocytes/Single Cells/dead cells/NALM6_cells | Count	Lymphocytes/Single Cells/Live cells/NALM6_cells | Count	Lymphocytes/Single Cells/dead cells/CAR-T cells | Count	Lymphocytes/Single Cells/Live cells/CAR-T cells | Count	(to 1:1 WPRE)
	72hrs_Jeko1_500IL2_Experiment_Control_1-1A.fcs	1766	128	1370	4857	0.752595	93.2418	77.999		CAR-T to B tumor ratio		Control			WPRE			LTR			TCRA			TCRB
	72hrs_Jeko1_500IL2_Experiment_Control_1-1B.fcs	1786	118	1549	4730	0.732917	93.8025	75.3305		_2-1	90.8791	88.1104	87.8723	75.8007	76.8627	75.8779	82.6958	82.3718	81.9596	85.3234	85.1293	84.9699	87.931	86.0636	88.5496
	72hrs_Jeko1_500IL2_Experiment_Control_1-1C.fcs	1743	118	914	5210	0.807293	93.6593	85.0751		_1-1	93.2418	93.8025	93.6593	76.9585	77.9083	75.8842	85.5392	87.2659	84.5985	84.9541	87.7483	82.658	89.6406	93.7143	90.0181
	72hrs_Jeko1_500IL2_Experiment_Control_1-2A.fcs	2355	349	578	3966	0.614534	87.0932	87.2799		_1-2	87.0932	86.8993	87.7877	73.9529	73.8111	76.5205	86.7168	84.1346	80.315	82.0238	81.8622	78.3555	88.0922	89.1228	88.0597
	72hrs_Jeko1_500IL2_Experiment_Control_1-2B.fcs	2441	368	566	3805	0.589587	86.8993	87.051		_1-4	82.4984	81.4452	85.1852	79.8736	79.7893	81.4082	85.7952	82.0751	86.7165	82.4503	77.072	78.9753	88.9161	90.4098	86.0122
	72hrs_Jeko1_500IL2_Experiment_Control_1-2C.fcs	2365	329	600	3950	0.612055	87.7877	86.8132
	72hrs_Jeko1_500IL2_Experiment_Control_1-4A.fcs	2569	545	318	2697	0.417902	82.4984	89.4527
	72hrs_Jeko1_500IL2_Experiment_Control_1-4B.fcs	2660	606	320	2637	0.408605	81.4452	89.1782		CAR-T to B tumor ratio		Cntrl T cells			WPRE T cells			LTR T cells			TCRA T cells			TCRB T cells
	72hrs_Jeko1_500IL2_Experiment_Control_1-4C.fcs	2944	512	429	2539	0.39342	85.1852	85.5458		_2-1	1.10418	1.06327	1.04979	1.08605	1.06931	1.0625	1.1175	1.09101	1.07489	1.10588	1.11626	1.11549	1.11735	1.12153	1.12107
	72hrs_Jeko1_500IL2_Experiment_Control_2-1A.fcs	827	83	742	7126	1.10418	90.8791	90.5694		_1-1	0.752595	0.732917	0.807293	1.01834	0.976654	1.00501	1.05088	1.03011	1.01121	1.1065	1.08481	1.10433	1.10635	1.06343	1.10154
	72hrs_Jeko1_500IL2_Experiment_Control_2-1B.fcs	830	112	1072	6862	1.06327	88.1104	86.4885		_1-2	0.614534	0.589587	0.612055	0.799236	0.804814	0.76964	0.787459	0.746707	0.790093	0.92676	1.0188	0.994164	1.00733	1.00718	0.97495
	72hrs_Jeko1_500IL2_Experiment_Control_2-1C.fcs	826	114	1159	6775	1.04979	87.8723	85.392		_1-4	0.417902	0.408605	0.39342	0.533185	0.56681	0.58184	0.496927	0.537214	0.492588	0.813181	0.81783	0.828831	0.770105	0.816125	0.821239
	Sample:	Lymphocytes/Single Cells/dead cells/NALM6_cells | Count	Lymphocytes/Single Cells/Live cells/NALM6_cells | Count	Lymphocytes/Single Cells/dead cells/CAR-T cells | Count	Lymphocytes/Single Cells/Live cells/CAR-T cells | Count
	72hrs_Jeko1_500IL2_Experiment_WPRE_1-1A.fcs	668	200	1312	6572	1.01834	76.9585	83.3587
	72hrs_Jeko1_500IL2_Experiment_WPRE_1-1B.fcs	663	188	1504	6303	0.976654	77.9083	80.7352
	72hrs_Jeko1_500IL2_Experiment_WPRE_1-1C.fcs	708	225	1239	6486	1.00501	75.8842	83.9612
	72hrs_Jeko1_500IL2_Experiment_WPRE_1-2A.fcs	1130	398	1266	5158	0.799236	73.9529	80.2927
	72hrs_Jeko1_500IL2_Experiment_WPRE_1-2B.fcs	1102	391	1310	5194	0.804814	73.8111	79.8585
	72hrs_Jeko1_500IL2_Experiment_WPRE_1-2C.fcs	1082	332	1459	4967	0.76964	76.5205	77.2954
	72hrs_Jeko1_500IL2_Experiment_WPRE_1-4A.fcs	1770	446	1060	3441	0.533185	79.8736	76.4497
	72hrs_Jeko1_500IL2_Experiment_WPRE_1-4B.fcs	1666	422	1193	3658	0.56681	79.7893	75.4071
	72hrs_Jeko1_500IL2_Experiment_WPRE_1-4C.fcs	1769	404	1300	3755	0.58184	81.4082	74.2829
	72hrs_Jeko1_500IL2_Experiment_WPRE_2-1A.fcs	426	136	1375	7009	1.08605	75.8007	83.5997
	72hrs_Jeko1_500IL2_Experiment_WPRE_2-1B.fcs	392	118	1338	6901	1.06931	76.8627	83.7602
	72hrs_Jeko1_500IL2_Experiment_WPRE_2-1C.fcs	497	158	1398	6857	1.0625	75.8779	83.0648
	Sample:	Lymphocytes/Single Cells/dead cells/NALM6_cells | Count	Lymphocytes/Single Cells/Live cells/NALM6_cells | Count	Lymphocytes/Single Cells/dead cells/CAR-T cells | Count	Lymphocytes/Single Cells/Live cells/CAR-T cells | Count
	72hrs_Jeko1_500IL2_Experiment_LTR_1-1A.fcs	698	118	1190	6782	1.05088	85.5392	85.0728
	72hrs_Jeko1_500IL2_Experiment_LTR_1-1B.fcs	699	102	1320	6648	1.03011	87.2659	83.4337
	72hrs_Jeko1_500IL2_Experiment_LTR_1-1C.fcs	769	140	1241	6526	1.01121	84.5985	84.0221
	72hrs_Jeko1_500IL2_Experiment_LTR_1-2A.fcs	1384	212	1193	5082	0.787459	86.7168	80.988
	72hrs_Jeko1_500IL2_Experiment_LTR_1-2B.fcs	1400	264	1243	4819	0.746707	84.1346	79.4952
	72hrs_Jeko1_500IL2_Experiment_LTR_1-2C.fcs	1224	300	1257	5099	0.790093	80.315	80.2234
	72hrs_Jeko1_500IL2_Experiment_LTR_1-4A.fcs	1969	326	1087	3207	0.496927	85.7952	74.6856
	72hrs_Jeko1_500IL2_Experiment_LTR_1-4B.fcs	2033	444	1126	3467	0.537214	82.0751	75.4844
	72hrs_Jeko1_500IL2_Experiment_LTR_1-4C.fcs	2089	320	1312	3179	0.492588	86.7165	70.786
	72hrs_Jeko1_500IL2_Experiment_LTR_2-1A.fcs	454	95	1264	7212	1.1175	82.6958	85.0873
	72hrs_Jeko1_500IL2_Experiment_LTR_2-1B.fcs	514	110	1285	7041	1.09101	82.3718	84.5664
	72hrs_Jeko1_500IL2_Experiment_LTR_2-1C.fcs	527	116	1310	6937	1.07489	81.9596	84.1154
	Sample:	Lymphocytes/Single Cells/dead cells/NALM6_cells | Count	Lymphocytes/Single Cells/Live cells/NALM6_cells | Count	Lymphocytes/Single Cells/dead cells/CAR-T cells | Count	Lymphocytes/Single Cells/Live cells/CAR-T cells | Count
	72hrs_Jeko1_500IL2_Experiment_TCRA_1-1A.fcs	463	82	1200	7141	1.1065	84.9541	85.6132
	72hrs_Jeko1_500IL2_Experiment_TCRA_1-1B.fcs	530	74	1292	7001	1.08481	87.7483	84.4206
	72hrs_Jeko1_500IL2_Experiment_TCRA_1-1C.fcs	510	107	1133	7127	1.10433	82.658	86.2833
	72hrs_Jeko1_500IL2_Experiment_TCRA_1-2A.fcs	689	151	1379	5981	0.92676	82.0238	81.2636
	72hrs_Jeko1_500IL2_Experiment_TCRA_1-2B.fcs	677	150	1199	6575	1.0188	81.8622	84.5768
	72hrs_Jeko1_500IL2_Experiment_TCRA_1-2C.fcs	648	179	1348	6416	0.994164	78.3555	82.6378
	72hrs_Jeko1_500IL2_Experiment_TCRA_1-4A.fcs	996	212	1354	5248	0.813181	82.4503	79.4911
	72hrs_Jeko1_500IL2_Experiment_TCRA_1-4B.fcs	995	296	1478	5278	0.81783	77.072	78.1231
	72hrs_Jeko1_500IL2_Experiment_TCRA_1-4C.fcs	894	238	1610	5349	0.828831	78.9753	76.8645
	72hrs_Jeko1_500IL2_Experiment_TCRA_2-1A.fcs	343	59	1419	7137	1.10588	85.3234	83.4151
	72hrs_Jeko1_500IL2_Experiment_TCRA_2-1B.fcs	395	69	1250	7204	1.11626	85.1293	85.2141
	72hrs_Jeko1_500IL2_Experiment_TCRA_2-1C.fcs	424	75	1228	7199	1.11549	84.9699	85.4278
	Sample:	Lymphocytes/Single Cells/dead cells/NALM6_cells | Count	Lymphocytes/Single Cells/Live cells/NALM6_cells | Count	Lymphocytes/Single Cells/dead cells/CAR-T cells | Count	Lymphocytes/Single Cells/Live cells/CAR-T cells | Count
	72hrs_Jeko1_500IL2_Experiment_TCRB_1-1A.fcs	424	49	1249	7140	1.10635	89.6406	85.1115
	72hrs_Jeko1_500IL2_Experiment_TCRB_1-1B.fcs	492	33	1421	6863	1.06343	93.7143	82.8465
	72hrs_Jeko1_500IL2_Experiment_TCRB_1-1C.fcs	496	55	1164	7109	1.10154	90.0181	85.9301
	72hrs_Jeko1_500IL2_Experiment_TCRB_1-2A.fcs	688	93	1217	6501	1.00733	88.0922	84.2317
	72hrs_Jeko1_500IL2_Experiment_TCRB_1-2B.fcs	762	93	1193	6500	1.00718	89.1228	84.4924
	72hrs_Jeko1_500IL2_Experiment_TCRB_1-2C.fcs	708	96	1407	6292	0.97495	88.0597	81.7249
	72hrs_Jeko1_500IL2_Experiment_TCRB_1-4A.fcs	1091	136	1408	4970	0.770105	88.9161	77.9241
	72hrs_Jeko1_500IL2_Experiment_TCRB_1-4B.fcs	1103	117	1485	5267	0.816125	90.4098	78.0065
	72hrs_Jeko1_500IL2_Experiment_TCRB_1-4C.fcs	990	161	1583	5300	0.821239	86.0122	77.0013
	72hrs_Jeko1_500IL2_Experiment_TCRB_2-1A.fcs	306	42	1381	7211	1.11735	87.931	83.9269
	72hrs_Jeko1_500IL2_Experiment_TCRB_2-1B.fcs	352	57	1280	7238	1.12153	86.0636	84.973
	72hrs_Jeko1_500IL2_Experiment_TCRB_2-1C.fcs	348	45	1330	7235	1.12107	88.5496	84.4717
