# Supplementary material for: Robust T cell activation requires an eIF3-driven burst in T cell receptor translation
Source: eLife journal article supplement (doi:10.7554/elife.74272), 2021-12-31
Supplement: supp [file DeSilva_Figure6-figure-supplement-5C-D.xlsx]

## Sheet: N-24hrs
		NALM6		CAR-T cells		Normalized live T cells	NALM6 dead %	CAR-T cells live %
	Sample:	dead cells	live cells	dead cells	live cells	(to 1:1 WPRE)
	NALM6_CAR_KO_24hrs_Experiment_Control_1-1A.fcs	2965	3435	1624	9377	1.42284	46.3281	85.2377		CAR-T to B tumor ratio		Control			WPRE			LTR			TCRA			TCRB
	NALM6_CAR_KO_24hrs_Experiment_Control_1-1B.fcs	2954	3408	1704	9220	1.39902	46.4319	84.4013		_2-1	52.5502	51.6262	48.9801	79.0439	79.0187	75.9885	77.4231	78.5578	75.5967	85.0861	83.3197	82.7818	78.7886	79.9949	78.7396
	NALM6_CAR_KO_24hrs_Experiment_Control_1-1C.fcs	2800	3344	1626	9517	1.44408	45.5729	85.4079		_1-1	46.3281	46.4319	45.5729	67.7067	70.2548	69.0655	67.9659	69.4868	70.467	77.0336	78.2924	76.814	70.6484	71.8367	73.3431
	NALM6_CAR_KO_24hrs_Experiment_Control_1-2A.fcs	3727	4392	1082	5868	0.890395	45.9047	84.4317		_1-2	45.9047	44.818	45.5625	63.5584	62.7777	63.0671	60.8104	60.066	61.7464	69.751	71.5072	73.2677	61.1984	63.5689	63.1786
	NALM6_CAR_KO_24hrs_Experiment_Control_1-2B.fcs	3546	4366	1058	5809	0.881443	44.818	84.593		_1-4	45.9184	46.3938	47.243	58.3417	58.4118	60.3654	55.9573	54.955	57.4281	66.1522	62.5027	65.0764	59.1461	57.3513	60.6585
	NALM6_CAR_KO_24hrs_Experiment_Control_1-2C.fcs	4030	4815	1101	6273	0.951849	45.5625	85.0692
	NALM6_CAR_KO_24hrs_Experiment_Control_1-4A.fcs	4005	4717	539	3101	0.470538	45.9184	85.1923
	NALM6_CAR_KO_24hrs_Experiment_Control_1-4B.fcs	3956	4571	593	3186	0.483435	46.3938	84.308		CAR-T to B tumor ratio		Cntrl T cells			WPRE T cells			LTR T cells			TCRA T cells			TCRB T cells
	NALM6_CAR_KO_24hrs_Experiment_Control_1-4C.fcs	4164	4650	551	3235	0.49087	47.243	85.4464		_2-1	1.71403	1.73345	1.76835	1.37929	1.40554	1.36594	1.43984	1.38582	1.36245	1.40099	1.37368	1.34014	1.53558	1.52466	1.48779
	NALM6_CAR_KO_24hrs_Experiment_Control_2-1A.fcs	2040	1842	2431	11296	1.71403	52.5502	82.2904		_1-1	1.42284	1.39902	1.44408	0.998129	0.984624	1.01725	1.07005	1.0652	1.07764	1.11618	1.10723	1.15973	1.23894	1.23954	1.2444
	NALM6_CAR_KO_24hrs_Experiment_Control_2-1B.fcs	2000	1874	2244	11424	1.73345	51.6262	83.5821		_1-2	0.890395	0.881443	0.951849	0.533509	0.606646	0.586617	0.643367	0.684184	0.685094	0.808609	0.85762	0.854737	0.955035	0.993121	0.981134
	NALM6_CAR_KO_24hrs_Experiment_Control_2-1C.fcs	1921	2001	2162	11654	1.76835	48.9801	84.3515		_1-4	0.470538	0.483435	0.49087	0.296343	0.299985	0.258712	0.33716	0.359466	0.342168	0.46204	0.477518	0.483891	0.495423	0.498761	0.520459
		NALM6		CAR-T cells
	Sample:	dead cells	live cells	dead cells	live cells
	NALM6_CAR_KO_24hrs_Experiment_WPRE_1-1A.fcs	5512	2629	1987	6578	0.998129	67.7067	76.8009
	NALM6_CAR_KO_24hrs_Experiment_WPRE_1-1B.fcs	5541	2346	2167	6489	0.984624	70.2548	74.9653
	NALM6_CAR_KO_24hrs_Experiment_WPRE_1-1C.fcs	5528	2476	2012	6704	1.01725	69.0655	76.916
	NALM6_CAR_KO_24hrs_Experiment_WPRE_1-2A.fcs	5930	3400	1191	3516	0.533509	63.5584	74.6973
	NALM6_CAR_KO_24hrs_Experiment_WPRE_1-2B.fcs	5736	3401	1212	3998	0.606646	62.7777	76.737
	NALM6_CAR_KO_24hrs_Experiment_WPRE_1-2C.fcs	5811	3403	1256	3866	0.586617	63.0671	75.4783
	NALM6_CAR_KO_24hrs_Experiment_WPRE_1-4A.fcs	5200	3713	571	1953	0.296343	58.3417	77.3772
	NALM6_CAR_KO_24hrs_Experiment_WPRE_1-4B.fcs	5149	3666	544	1977	0.299985	58.4118	78.4213
	NALM6_CAR_KO_24hrs_Experiment_WPRE_1-4C.fcs	5716	3753	679	1705	0.258712	60.3654	71.5185
	NALM6_CAR_KO_24hrs_Experiment_WPRE_2-1A.fcs	4266	1131	2715	9090	1.37929	79.0439	77.0013
	NALM6_CAR_KO_24hrs_Experiment_WPRE_2-1B.fcs	4139	1099	2660	9263	1.40554	79.0187	77.6902
	NALM6_CAR_KO_24hrs_Experiment_WPRE_2-1C.fcs	3959	1251	2563	9002	1.36594	75.9885	77.8383
		NALM6		CAR-T cells
	Sample:	dead cells	live cells	dead cells	live cells
	NALM6_CAR_KO_24hrs_Experiment_LTR_1-1A.fcs	5336	2515	1930	7052	1.07005	67.9659	78.5126
	NALM6_CAR_KO_24hrs_Experiment_LTR_1-1B.fcs	5429	2384	2059	7020	1.0652	69.4868	77.3213
	NALM6_CAR_KO_24hrs_Experiment_LTR_1-1C.fcs	5538	2321	2020	7102	1.07764	70.467	77.8557
	NALM6_CAR_KO_24hrs_Experiment_LTR_1-2A.fcs	5493	3540	1270	4240	0.643367	60.8104	76.951
	NALM6_CAR_KO_24hrs_Experiment_LTR_1-2B.fcs	5460	3630	1252	4509	0.684184	60.066	78.2677
	NALM6_CAR_KO_24hrs_Experiment_LTR_1-2C.fcs	5756	3566	1298	4515	0.685094	61.7464	77.6707
	NALM6_CAR_KO_24hrs_Experiment_LTR_1-4A.fcs	5138	4044	643	2222	0.33716	55.9573	77.5567
	NALM6_CAR_KO_24hrs_Experiment_LTR_1-4B.fcs	4880	4000	544	2369	0.359466	54.955	81.3251
	NALM6_CAR_KO_24hrs_Experiment_LTR_1-4C.fcs	5408	4009	704	2255	0.342168	57.4281	76.2082
	NALM6_CAR_KO_24hrs_Experiment_LTR_2-1A.fcs	4002	1167	2610	9489	1.43984	77.4231	78.428
	NALM6_CAR_KO_24hrs_Experiment_LTR_2-1B.fcs	4118	1124	2831	9133	1.38582	78.5578	76.3373
	NALM6_CAR_KO_24hrs_Experiment_LTR_2-1C.fcs	3959	1278	2740	8979	1.36245	75.5967	76.6192
		NALM6		CAR-T cells
	Sample:	dead cells	live cells	dead cells	live cells
	NALM6_CAR_KO_24hrs_Experiment_TCRA_1-1A.fcs	4877	1454	3182	7356	1.11618	77.0336	69.8045
	NALM6_CAR_KO_24hrs_Experiment_TCRA_1-1B.fcs	4750	1317	3413	7297	1.10723	78.2924	68.1326
	NALM6_CAR_KO_24hrs_Experiment_TCRA_1-1C.fcs	4605	1390	3301	7643	1.15973	76.814	69.8374
	NALM6_CAR_KO_24hrs_Experiment_TCRA_1-2A.fcs	6332	2746	2305	5329	0.808609	69.751	69.8061
	NALM6_CAR_KO_24hrs_Experiment_TCRA_1-2B.fcs	6234	2484	2470	5652	0.85762	71.5072	69.5888
	NALM6_CAR_KO_24hrs_Experiment_TCRA_1-2C.fcs	6397	2334	2411	5633	0.854737	73.2677	70.0273
	NALM6_CAR_KO_24hrs_Experiment_TCRA_1-4A.fcs	6043	3092	1374	3045	0.46204	66.1522	68.907
	NALM6_CAR_KO_24hrs_Experiment_TCRA_1-4B.fcs	5834	3500	1169	3147	0.477518	62.5027	72.9147
	NALM6_CAR_KO_24hrs_Experiment_TCRA_1-4C.fcs	6261	3360	1349	3189	0.483891	65.0764	70.2732
	NALM6_CAR_KO_24hrs_Experiment_TCRA_2-1A.fcs	3212	563	4098	9233	1.40099	85.0861	69.2596
	NALM6_CAR_KO_24hrs_Experiment_TCRA_2-1B.fcs	3047	610	4303	9053	1.37368	83.3197	67.7823
	NALM6_CAR_KO_24hrs_Experiment_TCRA_2-1C.fcs	3202	666	4256	8832	1.34014	82.7818	67.4817
		NALM6		CAR-T cells
	Sample:	dead cells	live cells	dead cells	live cells
	NALM6_CAR_KO_24hrs_Experiment_TCRB_1-1A.fcs	4489	1865	2573	8165	1.23894	70.6484	76.0384
	NALM6_CAR_KO_24hrs_Experiment_TCRB_1-1B.fcs	4400	1725	2863	8169	1.23954	71.8367	74.0482
	NALM6_CAR_KO_24hrs_Experiment_TCRB_1-1C.fcs	4515	1641	2852	8201	1.2444	73.3431	74.1971
	NALM6_CAR_KO_24hrs_Experiment_TCRB_1-2A.fcs	5413	3432	1800	6294	0.955035	61.1984	77.7613
	NALM6_CAR_KO_24hrs_Experiment_TCRB_1-2B.fcs	5479	3140	1951	6545	0.993121	63.5689	77.0363
	NALM6_CAR_KO_24hrs_Experiment_TCRB_1-2C.fcs	5470	3188	1836	6466	0.981134	63.1786	77.8848
	NALM6_CAR_KO_24hrs_Experiment_TCRB_1-4A.fcs	5167	3569	961	3265	0.495423	59.1461	77.2598
	NALM6_CAR_KO_24hrs_Experiment_TCRB_1-4B.fcs	5071	3771	906	3287	0.498761	57.3513	78.3926
	NALM6_CAR_KO_24hrs_Experiment_TCRB_1-4C.fcs	5435	3525	1040	3430	0.520459	60.6585	76.7338
	NALM6_CAR_KO_24hrs_Experiment_TCRB_2-1A.fcs	3135	844	3222	10120	1.53558	78.7886	75.8507
	NALM6_CAR_KO_24hrs_Experiment_TCRB_2-1B.fcs	3115	779	3462	10048	1.52466	79.9949	74.3745
	NALM6_CAR_KO_24hrs_Experiment_TCRB_2-1C.fcs	3111	840	3560	9805	1.48779	78.7396	73.3633

## Sheet: N-48hrs
		NALM6		CAR-T cells		Normalized live T cells	NALM6 dead %	CAR-T cells live %
	Sample:	dead cells	live cells	dead cells	live cells	(to 1:1 WPRE)
	NALM6_CAR_KO_48hrs_Experiment_Control_1-1A.fcs	3755	2034	2096	9678	1.44599	64.8644	82.1981		CAR-T to B tumor ratio		Control			WPRE			LTR			TCRA			TCRB
	NALM6_CAR_KO_48hrs_Experiment_Control_1-1B.fcs	3780	2012	2073	9845	1.47094	65.2624	82.6061		_2-1	72.8958	73.0806	69.2944	94.0581	93.8892	92.4299	94.2268	94.6573	93.3181	97.0982	96.5625	95.571	95.4589	95.8683	95.5219
	NALM6_CAR_KO_48hrs_Experiment_Control_1-1C.fcs	4101	2012	2088	9461	1.41357	67.0865	81.9205		_1-1	64.8644	65.2624	67.0865	89.6299	90.5332	90.1601	88.9757	88.0805	89.2158	93.7406	92.4216	94.5641	92.9658	92.6871	92.1393
	NALM6_CAR_KO_48hrs_Experiment_Control_1-2A.fcs	5260	3233	1490	6867	1.026	61.9334	82.1706		_1-2	61.9334	65.1644	62.9063	82.7746	84.4137	83.2602	83.9354	84.0157	81.9798	91.7559	92.7191	91.4846	88.5381	89.7217	87.8011
	NALM6_CAR_KO_48hrs_Experiment_Control_1-2B.fcs	5509	2945	1388	6572	0.981921	65.1644	82.5628		_1-4	63.8229	64.3468	65.4	78.0821	77.3897	78.5335	76.2144	76.6997	77.9008	82.2728	83.7741	84.3041	79.5253	80.5663	80.4401
	NALM6_CAR_KO_48hrs_Experiment_Control_1-2C.fcs	5554	3275	1526	7021	1.04901	62.9063	82.1458
	NALM6_CAR_KO_48hrs_Experiment_Control_1-4A.fcs	5693	3227	826	3526	0.526819	63.8229	81.0202
	NALM6_CAR_KO_48hrs_Experiment_Control_1-4B.fcs	5723	3171	739	3538	0.528612	64.3468	82.7215		CAR-T to B tumor ratio		Cntrl T cells			WPRE T cells			LTR T cells			TCRA T cells			TCRB T cells
	NALM6_CAR_KO_48hrs_Experiment_Control_1-4C.fcs	5576	2950	766	3372	0.50381	65.4	81.4886		_2-1	1.71493	1.77051	1.76438	1.28044	1.23203	1.32019	1.32541	1.29822	1.27551	1.24712	1.16405	1.27372	1.36531	1.41611	1.40296
	NALM6_CAR_KO_48hrs_Experiment_Control_2-1A.fcs	2399	892	2739	11478	1.71493	72.8958	80.7343		_1-1	1.44599	1.47094	1.41357	0.976991	1.00822	1.01479	1.02316	1.01912	1.01912	1.05125	1.07829	1.05588	1.18915	1.17048	1.17242
	NALM6_CAR_KO_48hrs_Experiment_Control_2-1B.fcs	2313	852	2808	11850	1.77051	73.0806	80.8432		_1-2	1.026	0.981921	1.04901	0.680562	0.700732	0.701778	0.737487	0.724638	0.726281	0.757209	0.735993	0.767518	0.817272	0.837293	0.904079
	NALM6_CAR_KO_48hrs_Experiment_Control_2-1C.fcs	2347	1040	2489	11809	1.76438	69.2944	82.592		_1-4	0.526819	0.528612	0.50381	0.382041	0.377409	0.356641	0.447781	0.410279	0.445092	0.559689	0.591514	0.598984	0.623786	0.589422	0.642911
		NALM6		CAR-T cells
	Sample:	dead cells	live cells	dead cells	live cells
	NALM6_CAR_KO_48hrs_Experiment_WPRE_1-1A.fcs	5376	622	2879	6539	0.976991	89.6299	69.4309
	NALM6_CAR_KO_48hrs_Experiment_WPRE_1-1B.fcs	5518	577	2862	6748	1.00822	90.5332	70.2185
	NALM6_CAR_KO_48hrs_Experiment_WPRE_1-1C.fcs	5461	596	2958	6792	1.01479	90.1601	69.6615
	NALM6_CAR_KO_48hrs_Experiment_WPRE_1-2A.fcs	7333	1526	2257	4555	0.680562	82.7746	66.8673
	NALM6_CAR_KO_48hrs_Experiment_WPRE_1-2B.fcs	7566	1397	2160	4690	0.700732	84.4137	68.4672
	NALM6_CAR_KO_48hrs_Experiment_WPRE_1-2C.fcs	7401	1488	2258	4697	0.701778	83.2602	67.5341
	NALM6_CAR_KO_48hrs_Experiment_WPRE_1-4A.fcs	7784	2185	1278	2557	0.382041	78.0821	66.6754
	NALM6_CAR_KO_48hrs_Experiment_WPRE_1-4B.fcs	7489	2188	1190	2526	0.377409	77.3897	67.9763
	NALM6_CAR_KO_48hrs_Experiment_WPRE_1-4C.fcs	7390	2020	1175	2387	0.356641	78.5335	67.0129
	NALM6_CAR_KO_48hrs_Experiment_WPRE_2-1A.fcs	3530	223	3265	8570	1.28044	94.0581	72.4123
	NALM6_CAR_KO_48hrs_Experiment_WPRE_2-1B.fcs	3626	236	3319	8246	1.23203	93.8892	71.3013
	NALM6_CAR_KO_48hrs_Experiment_WPRE_2-1C.fcs	3492	286	3078	8836	1.32019	92.4299	74.1648
		NALM6		CAR-T cells
	Sample:	dead cells	live cells	dead cells	live cells
	NALM6_CAR_KO_48hrs_Experiment_LTR_1-1A.fcs	5924	734	2803	6848	1.02316	88.9757	70.9564
	NALM6_CAR_KO_48hrs_Experiment_LTR_1-1B.fcs	5823	788	2755	6821	1.01912	88.0805	71.2302
	NALM6_CAR_KO_48hrs_Experiment_LTR_1-1C.fcs	5882	711	2879	6821	1.01912	89.2158	70.3196
	NALM6_CAR_KO_48hrs_Experiment_LTR_1-2A.fcs	7738	1481	2268	4936	0.737487	83.9354	68.5175
	NALM6_CAR_KO_48hrs_Experiment_LTR_1-2B.fcs	7695	1464	2227	4850	0.724638	84.0157	68.5319
	NALM6_CAR_KO_48hrs_Experiment_LTR_1-2C.fcs	7702	1693	2019	4861	0.726281	81.9798	70.6541
	NALM6_CAR_KO_48hrs_Experiment_LTR_1-4A.fcs	7139	2228	1096	2997	0.447781	76.2144	73.2226
	NALM6_CAR_KO_48hrs_Experiment_LTR_1-4B.fcs	7051	2142	1061	2746	0.410279	76.6997	72.1303
	NALM6_CAR_KO_48hrs_Experiment_LTR_1-4C.fcs	7600	2156	1165	2979	0.445092	77.9008	71.8871
	NALM6_CAR_KO_48hrs_Experiment_LTR_2-1A.fcs	3656	224	3353	8871	1.32541	94.2268	72.5704
	NALM6_CAR_KO_48hrs_Experiment_LTR_2-1B.fcs	3756	212	3395	8689	1.29822	94.6573	71.905
	NALM6_CAR_KO_48hrs_Experiment_LTR_2-1C.fcs	3687	264	3516	8537	1.27551	93.3181	70.8288
		NALM6		CAR-T cells
	Sample:	dead cells	live cells	dead cells	live cells
	NALM6_CAR_KO_48hrs_Experiment_TCRA_1-1A.fcs	4358	291	3997	7036	1.05125	93.7406	63.7723
	NALM6_CAR_KO_48hrs_Experiment_TCRA_1-1B.fcs	4244	348	3978	7217	1.07829	92.4216	64.4663
	NALM6_CAR_KO_48hrs_Experiment_TCRA_1-1C.fcs	4523	260	4000	7067	1.05588	94.5641	63.8565
	NALM6_CAR_KO_48hrs_Experiment_TCRA_1-2A.fcs	6344	570	3478	5068	0.757209	91.7559	59.3026
	NALM6_CAR_KO_48hrs_Experiment_TCRA_1-2B.fcs	6622	520	3519	4926	0.735993	92.7191	58.3304
	NALM6_CAR_KO_48hrs_Experiment_TCRA_1-2C.fcs	6489	604	3509	5137	0.767518	91.4846	59.4148
	NALM6_CAR_KO_48hrs_Experiment_TCRA_1-4A.fcs	8210	1769	2442	3746	0.559689	82.2728	60.5365
	NALM6_CAR_KO_48hrs_Experiment_TCRA_1-4B.fcs	7982	1546	2437	3959	0.591514	83.7741	61.8981
	NALM6_CAR_KO_48hrs_Experiment_TCRA_1-4C.fcs	8062	1501	2408	4009	0.598984	84.3041	62.4747
	NALM6_CAR_KO_48hrs_Experiment_TCRA_2-1A.fcs	2610	78	4412	8347	1.24712	97.0982	65.4205
	NALM6_CAR_KO_48hrs_Experiment_TCRA_2-1B.fcs	2472	88	3939	7791	1.16405	96.5625	66.4194
	NALM6_CAR_KO_48hrs_Experiment_TCRA_2-1C.fcs	2611	121	4355	8525	1.27372	95.571	66.1879
		NALM6		CAR-T cells
	Sample:	dead cells	live cells	dead cells	live cells
	NALM6_CAR_KO_48hrs_Experiment_TCRB_1-1A.fcs	4890	370	3471	7959	1.18915	92.9658	69.6325
	NALM6_CAR_KO_48hrs_Experiment_TCRB_1-1B.fcs	4867	384	3587	7834	1.17048	92.6871	68.5929
	NALM6_CAR_KO_48hrs_Experiment_TCRB_1-1C.fcs	4841	413	3615	7847	1.17242	92.1393	68.461
	NALM6_CAR_KO_48hrs_Experiment_TCRB_1-2A.fcs	7207	933	2919	5470	0.817272	88.5381	65.2044
	NALM6_CAR_KO_48hrs_Experiment_TCRB_1-2B.fcs	7027	805	3110	5604	0.837293	89.7217	64.3103
	NALM6_CAR_KO_48hrs_Experiment_TCRB_1-2C.fcs	6852	952	2798	6051	0.904079	87.8011	68.3806
	NALM6_CAR_KO_48hrs_Experiment_TCRB_1-4A.fcs	7640	1967	1833	4175	0.623786	79.5253	69.4907
	NALM6_CAR_KO_48hrs_Experiment_TCRB_1-4B.fcs	7085	1709	1591	3945	0.589422	80.5663	71.2608
	NALM6_CAR_KO_48hrs_Experiment_TCRB_1-4C.fcs	7604	1849	1782	4303	0.642911	80.4401	70.7149
	NALM6_CAR_KO_48hrs_Experiment_TCRB_2-1A.fcs	2964	141	4042	9138	1.36531	95.4589	69.3323
	NALM6_CAR_KO_48hrs_Experiment_TCRB_2-1B.fcs	2854	123	4069	9478	1.41611	95.8683	69.9638
	NALM6_CAR_KO_48hrs_Experiment_TCRB_2-1C.fcs	2901	136	4105	9390	1.40296	95.5219	69.5813

## Sheet: N-72hrs
		NALM6		CAR-T cells		Normalized live T cells	NALM6 dead %	CAR-T cells live %
	Sample:	dead cells	live cells	dead cells	live cells	(to 1:1 WPRE)
	NALM6_CAR_KO_72hrs_Experiment_Control_1-1A.fcs	3891	1231	2740	9550	1.04807	75.9664	77.7055		CAR-T to B tumor ratio		Control			WPRE			LTR			TCRA			TCRB
	NALM6_CAR_KO_72hrs_Experiment_Control_1-1B.fcs	3967	1360	2317	9659	1.06003	74.4697	80.653		_2-1	78	84.2171	78.113	93.3472	92.0033	89.0302	94.9299	95.731	92.431	94.5918	95.6545	93.1069	95.8813	96.0616	93.7635
	NALM6_CAR_KO_72hrs_Experiment_Control_1-1C.fcs	4136	1344	2271	9483	1.04072	75.4745	80.6789		_1-1	75.9664	74.4697	75.4745	89.7186	86.3453	88.4533	93.0918	88.5287	89.2549	93.007	86.7178	87.4101	92.8141	91.1013	91.1532
	NALM6_CAR_KO_72hrs_Experiment_Control_1-2A.fcs	5499	2384	1824	6904	0.757682	69.7577	79.1017		_1-2	69.7577	74.0136	69.291	86.7657	87.0293	86.3824	87.9335	88.6897	87.3651	88.1279	88.5138	88.781	91.5883	92.0845	90.2511
	NALM6_CAR_KO_72hrs_Experiment_Control_1-2B.fcs	5984	2101	1807	6987	0.766791	74.0136	79.4519		_1-4	73.2521	70.8051	73.8927	85.6844	84.6134	86.168	83.8522	84.5326	86.1094	88.3064	89.1247	90.913	87.2496	88.0834	87.7372
	NALM6_CAR_KO_72hrs_Experiment_Control_1-2C.fcs	5756	2551	1764	6986	0.766681	69.291	79.84
	NALM6_CAR_KO_72hrs_Experiment_Control_1-4A.fcs	6789	2479	1117	3975	0.436238	73.2521	78.0636
	NALM6_CAR_KO_72hrs_Experiment_Control_1-4B.fcs	6279	2589	992	3860	0.423617	70.8051	79.5548		CAR-T to B tumor ratio		Cntrl T cells			WPRE T cells			LTR T cells			TCRA T cells			TCRB T cells
	NALM6_CAR_KO_72hrs_Experiment_Control_1-4C.fcs	6957	2458	1087	3511	0.385316	73.8927	76.3593		_2-1	1.20468	1.23694	1.26646	1.16176	1.1802	1.14432	1.16956	1.14475	1.12215	1.04774	1.06782	1.06157	1.16176	1.14355	1.11589
	NALM6_CAR_KO_72hrs_Experiment_Control_2-1A.fcs	2340	660	2518	10977	1.20468	78	81.3412		_1-1	1.04807	1.06003	1.04072	1.00077	0.975198	1.02403	0.967735	0.934263	0.938543	0.977831	0.95709	0.971247	1.00505	0.992976	1.00088
	NALM6_CAR_KO_72hrs_Experiment_Control_2-1B.fcs	2684	503	3265	11271	1.23694	84.2171	77.5385		_1-2	0.757682	0.766791	0.766681	0.733538	0.761084	0.767888	0.624781	0.666813	0.647937	0.780399	0.821225	0.796093	0.730356	0.752524	0.738916
	NALM6_CAR_KO_72hrs_Experiment_Control_2-1C.fcs	2434	682	2728	11540	1.26646	78.113	80.8803		_1-4	0.436238	0.423617	0.385316	0.526888	0.522827	0.494293	0.387511	0.401449	0.469491	0.552349	0.607221	0.562555	0.538191	0.524912	0.510865
		NALM6		CAR-T cells
	Sample:	dead cells	live cells	dead cells	live cells
	NALM6_CAR_KO_72hrs_Experiment_WPRE_1-1A.fcs	3412	391	2457	9119	1.00077	89.7186	78.7751
	NALM6_CAR_KO_72hrs_Experiment_WPRE_1-1B.fcs	3206	507	2372	8886	0.975198	86.3453	78.9305
	NALM6_CAR_KO_72hrs_Experiment_WPRE_1-1C.fcs	3317	433	2464	9331	1.02403	88.4533	79.1098
	NALM6_CAR_KO_72hrs_Experiment_WPRE_1-2A.fcs	5081	775	2140	6684	0.733538	86.7657	75.748
	NALM6_CAR_KO_72hrs_Experiment_WPRE_1-2B.fcs	4992	744	2294	6935	0.761084	87.0293	75.1436
	NALM6_CAR_KO_72hrs_Experiment_WPRE_1-2C.fcs	4802	757	2326	6997	0.767888	86.3824	75.0509
	NALM6_CAR_KO_72hrs_Experiment_WPRE_1-4A.fcs	6560	1096	2023	4801	0.526888	85.6844	70.3546
	NALM6_CAR_KO_72hrs_Experiment_WPRE_1-4B.fcs	6555	1192	1959	4764	0.522827	84.6134	70.8612
	NALM6_CAR_KO_72hrs_Experiment_WPRE_1-4C.fcs	7488	1202	1884	4504	0.494293	86.168	70.5072
	NALM6_CAR_KO_72hrs_Experiment_WPRE_2-1A.fcs	2245	160	2722	10586	1.16176	93.3472	79.5461
	NALM6_CAR_KO_72hrs_Experiment_WPRE_2-1B.fcs	2209	192	2884	10754	1.1802	92.0033	78.8532
	NALM6_CAR_KO_72hrs_Experiment_WPRE_2-1C.fcs	2240	276	2688	10427	1.14432	89.0302	79.5044
		NALM6		CAR-T cells
	Sample:	dead cells	live cells	dead cells	live cells
	NALM6_CAR_KO_72hrs_Experiment_LTR_1-1A.fcs	4137	307	2840	8818	0.967735	93.0918	75.639
	NALM6_CAR_KO_72hrs_Experiment_LTR_1-1B.fcs	3851	499	2489	8513	0.934263	88.5287	77.3768
	NALM6_CAR_KO_72hrs_Experiment_LTR_1-1C.fcs	3929	473	2596	8552	0.938543	89.2549	76.7133
	NALM6_CAR_KO_72hrs_Experiment_LTR_1-2A.fcs	6187	849	2460	5693	0.624781	87.9335	69.8271
	NALM6_CAR_KO_72hrs_Experiment_LTR_1-2B.fcs	6085	776	2424	6076	0.666813	88.6897	71.4824
	NALM6_CAR_KO_72hrs_Experiment_LTR_1-2C.fcs	6071	878	2440	5904	0.647937	87.3651	70.7574
	NALM6_CAR_KO_72hrs_Experiment_LTR_1-4A.fcs	8080	1556	1847	3531	0.387511	83.8522	65.6564
	NALM6_CAR_KO_72hrs_Experiment_LTR_1-4B.fcs	7859	1438	1800	3658	0.401449	84.5326	67.0209
	NALM6_CAR_KO_72hrs_Experiment_LTR_1-4C.fcs	8220	1326	1785	4278	0.469491	86.1094	70.5591
	NALM6_CAR_KO_72hrs_Experiment_LTR_2-1A.fcs	2640	141	2876	10657	1.16956	94.9299	78.7482
	NALM6_CAR_KO_72hrs_Experiment_LTR_2-1B.fcs	2534	113	3124	10431	1.14475	95.731	76.9532
	NALM6_CAR_KO_72hrs_Experiment_LTR_2-1C.fcs	2479	203	3002	10225	1.12215	92.431	77.304
		NALM6		CAR-T cells
	Sample:	dead cells	live cells	dead cells	live cells
	NALM6_CAR_KO_72hrs_Experiment_TCRA_1-1A.fcs	2793	210	3462	8910	0.977831	93.007	72.0175
	NALM6_CAR_KO_72hrs_Experiment_TCRA_1-1B.fcs	2827	433	3184	8721	0.95709	86.7178	73.2549
	NALM6_CAR_KO_72hrs_Experiment_TCRA_1-1C.fcs	2673	385	3199	8850	0.971247	87.4101	73.4501
	NALM6_CAR_KO_72hrs_Experiment_TCRA_1-2A.fcs	4298	579	2913	7111	0.780399	88.1279	70.9397
	NALM6_CAR_KO_72hrs_Experiment_TCRA_1-2B.fcs	4169	541	3049	7483	0.821225	88.5138	71.0501
	NALM6_CAR_KO_72hrs_Experiment_TCRA_1-2C.fcs	4115	520	3090	7254	0.796093	88.781	70.1276
	NALM6_CAR_KO_72hrs_Experiment_TCRA_1-4A.fcs	6064	803	2620	5033	0.552349	88.3064	65.7651
	NALM6_CAR_KO_72hrs_Experiment_TCRA_1-4B.fcs	5753	702	2843	5533	0.607221	89.1247	66.0578
	NALM6_CAR_KO_72hrs_Experiment_TCRA_1-4C.fcs	6353	635	2718	5126	0.562555	90.913	65.3493
	NALM6_CAR_KO_72hrs_Experiment_TCRA_2-1A.fcs	1819	104	3684	9547	1.04774	94.5918	72.1563
	NALM6_CAR_KO_72hrs_Experiment_TCRA_2-1B.fcs	1761	80	3845	9730	1.06782	95.6545	71.6759
	NALM6_CAR_KO_72hrs_Experiment_TCRA_2-1C.fcs	1864	138	3777	9673	1.06157	93.1069	71.9182
		NALM6		CAR-T cells
	Sample:	dead cells	live cells	dead cells	live cells
	NALM6_CAR_KO_72hrs_Experiment_TCRB_1-1A.fcs	3539	274	3298	9158	1.00505	92.8141	73.5228
	NALM6_CAR_KO_72hrs_Experiment_TCRB_1-1B.fcs	3491	341	3182	9048	0.992976	91.1013	73.982
	NALM6_CAR_KO_72hrs_Experiment_TCRB_1-1C.fcs	3462	336	3069	9120	1.00088	91.1532	74.8216
	NALM6_CAR_KO_72hrs_Experiment_TCRB_1-2A.fcs	5651	519	2939	6655	0.730356	91.5883	69.3663
	NALM6_CAR_KO_72hrs_Experiment_TCRB_1-2B.fcs	5491	472	2952	6857	0.752524	92.0845	69.9052
	NALM6_CAR_KO_72hrs_Experiment_TCRB_1-2C.fcs	5499	594	2950	6733	0.738916	90.2511	69.5342
	NALM6_CAR_KO_72hrs_Experiment_TCRB_1-4A.fcs	7404	1082	2321	4904	0.538191	87.2496	67.8754
	NALM6_CAR_KO_72hrs_Experiment_TCRB_1-4B.fcs	7606	1029	2323	4783	0.524912	88.0834	67.3093
	NALM6_CAR_KO_72hrs_Experiment_TCRB_1-4C.fcs	7720	1079	2381	4655	0.510865	87.7372	66.1597
	NALM6_CAR_KO_72hrs_Experiment_TCRB_2-1A.fcs	2165	93	3545	10586	1.16176	95.8813	74.9133
	NALM6_CAR_KO_72hrs_Experiment_TCRB_2-1B.fcs	2122	87	3711	10420	1.14355	96.0616	73.7386
	NALM6_CAR_KO_72hrs_Experiment_TCRB_2-1C.fcs	2165	144	3703	10168	1.11589	93.7635	73.304

## Sheet: J-24hrs
		Jeko1		CAR-T cells		Normalized live T cells	NALM6 dead %	CAR-T cells live %
	Sample:	dead cells	live cells	dead cells	live cells	(to 1:1 WPRE)
	Jeko1_CAR_KO_24hrs_Experiment_Control_1-1A.fcs	1108	5964	1613	8964	1.28498	15.6674	84.7499		CAR-T to B tumor ratio		Control			WPRE			LTR			TCRA			TCRB
	Jeko1_CAR_KO_24hrs_Experiment_Control_1-1B.fcs	1130	5971	1409	8978	1.28698	15.9133	86.435		_2-1	19.6937	18.9912	20.592	66.8939	64.2114	66.5009	66.6667	61.3871	65.5158	77.1594	74.4292	74.6154	72.9925	75.1333	74.3663
	Jeko1_CAR_KO_24hrs_Experiment_Control_1-1C.fcs	1177	5845	1592	8981	1.28741	16.7616	84.9428		_1-1	15.6674	15.9133	16.7616	61.1529	61.725	62.6152	53.8317	61.4093	60.3608	68.0158	70.5627	71.8679	66.0176	70.4156	70.263
	Jeko1_CAR_KO_24hrs_Experiment_Control_1-2A.fcs	1307	7318	1100	5254	0.753154	15.1536	82.6881		_1-2	15.1536	15.1486	15.5025	58.792	58.0327	62.4353	49.4556	51.4135	53.457	67.8594	69.0632	74.5639	60.6072	62.6788	64.624
	Jeko1_CAR_KO_24hrs_Experiment_Control_1-2B.fcs	1269	7108	1037	5239	0.751003	15.1486	83.4767		_1-4	14.6478	14.859	13.7145	47.9153	50.0894	50.0242	37.8466	43.2125	45.1769	59.4684	65.0043	68.8116	48.8709	49.7617	53.6788
	Jeko1_CAR_KO_24hrs_Experiment_Control_1-2C.fcs	1254	6835	881	5500	0.788417	15.5025	86.1934
	Jeko1_CAR_KO_24hrs_Experiment_Control_1-4A.fcs	1254	7307	575	3117	0.446818	14.6478	84.4258
	Jeko1_CAR_KO_24hrs_Experiment_Control_1-4B.fcs	1333	7638	529	2924	0.419151	14.859	84.68		CAR-T to B tumor ratio		Cntrl T cells			WPRE T cells			LTR T cells			TCRA T cells			TCRB T cells
	Jeko1_CAR_KO_24hrs_Experiment_Control_1-4C.fcs	1228	7726	518	2877	0.412414	13.7145	84.7423		_2-1	1.66084	1.62758	1.66012	1.37901	1.3406	1.42374	1.32311	1.34705	1.3449	1.3783	1.35063	1.38876	1.45069	1.40525	1.47104
	Jeko1_CAR_KO_24hrs_Experiment_Control_2-1A.fcs	810	3303	2079	11586	1.66084	19.6937	84.7859		_1-1	1.28498	1.28698	1.28741	1.01089	0.990539	0.998567	1.00158	1.04515	1.04616	1.15525	1.11095	1.17015	1.20327	1.21617	1.19166
	Jeko1_CAR_KO_24hrs_Experiment_Control_2-1B.fcs	802	3421	2237	11354	1.62758	18.9912	83.5406		_1-2	0.753154	0.751003	0.788417	0.415998	0.387185	0.409404	0.487242	0.466026	0.481365	0.724627	0.674742	0.769782	0.803182	0.734518	0.777093
	Jeko1_CAR_KO_24hrs_Experiment_Control_2-1C.fcs	814	3139	2118	11581	1.66012	20.592	84.539		_1-4	0.446818	0.419151	0.412414	0.212586	0.205849	0.155533	0.236669	0.257741	0.199398	0.352494	0.3707	0.355505	0.394495	0.392919	0.383601
		Jeko1		CAR-T cells
	Sample:	dead cells	live cells	dead cells	live cells
	Jeko1_CAR_KO_24hrs_Experiment_WPRE_1-1A.fcs	4710	2992	1961	7052	1.01089	61.1529	78.2425
	Jeko1_CAR_KO_24hrs_Experiment_WPRE_1-1B.fcs	4888	3031	1821	6910	0.990539	61.725	79.1433
	Jeko1_CAR_KO_24hrs_Experiment_WPRE_1-1C.fcs	4822	2879	2001	6966	0.998567	62.6152	77.6848
	Jeko1_CAR_KO_24hrs_Experiment_WPRE_1-2A.fcs	4614	3234	995	2902	0.415998	58.792	74.4675
	Jeko1_CAR_KO_24hrs_Experiment_WPRE_1-2B.fcs	4472	3234	943	2701	0.387185	58.0327	74.1218
	Jeko1_CAR_KO_24hrs_Experiment_WPRE_1-2C.fcs	4825	2903	1018	2856	0.409404	62.4353	73.7223
	Jeko1_CAR_KO_24hrs_Experiment_WPRE_1-4A.fcs	3689	4010	511	1483	0.212586	47.9153	74.3731
	Jeko1_CAR_KO_24hrs_Experiment_WPRE_1-4B.fcs	4202	4187	496	1436	0.205849	50.0894	74.3271
	Jeko1_CAR_KO_24hrs_Experiment_WPRE_1-4C.fcs	4131	4127	475	1085	0.155533	50.0242	69.5513
	Jeko1_CAR_KO_24hrs_Experiment_WPRE_2-1A.fcs	3336	1651	2496	9620	1.37901	66.8939	79.3991
	Jeko1_CAR_KO_24hrs_Experiment_WPRE_2-1B.fcs	3269	1822	2668	9352	1.3406	64.2114	77.8037
	Jeko1_CAR_KO_24hrs_Experiment_WPRE_2-1C.fcs	3075	1549	2693	9932	1.42374	66.5009	78.6693
		Jeko1		CAR-T cells
	Sample:	dead cells	live cells	dead cells	live cells
	Jeko1_CAR_KO_24hrs_Experiment_LTR_1-1A.fcs	4292	3681	1932	6987	1.00158	53.8317	78.3384
	Jeko1_CAR_KO_24hrs_Experiment_LTR_1-1B.fcs	4645	2919	1937	7291	1.04515	61.4093	79.0095
	Jeko1_CAR_KO_24hrs_Experiment_LTR_1-1C.fcs	4550	2988	2050	7298	1.04616	60.3608	78.0702
	Jeko1_CAR_KO_24hrs_Experiment_LTR_1-2A.fcs	4088	4178	1021	3399	0.487242	49.4556	76.9005
	Jeko1_CAR_KO_24hrs_Experiment_LTR_1-2B.fcs	4001	3781	946	3251	0.466026	51.4135	77.4601
	Jeko1_CAR_KO_24hrs_Experiment_LTR_1-2C.fcs	4206	3662	1026	3358	0.481365	53.457	76.5967
	Jeko1_CAR_KO_24hrs_Experiment_LTR_1-4A.fcs	3153	5178	520	1651	0.236669	37.8466	76.0479
	Jeko1_CAR_KO_24hrs_Experiment_LTR_1-4B.fcs	3683	4840	525	1798	0.257741	43.2125	77.3999
	Jeko1_CAR_KO_24hrs_Experiment_LTR_1-4C.fcs	3639	4416	707	1391	0.199398	45.1769	66.3012
	Jeko1_CAR_KO_24hrs_Experiment_LTR_2-1A.fcs	3420	1710	2659	9230	1.32311	66.6667	77.6348
	Jeko1_CAR_KO_24hrs_Experiment_LTR_2-1B.fcs	3151	1982	2833	9397	1.34705	61.3871	76.8357
	Jeko1_CAR_KO_24hrs_Experiment_LTR_2-1C.fcs	3226	1698	2886	9382	1.3449	65.5158	76.4754
		Jeko1		CAR-T cells
	Sample:	dead cells	live cells	dead cells	live cells
	Jeko1_CAR_KO_24hrs_Experiment_TCRA_1-1A.fcs	3966	1865	3246	8059	1.15525	68.0158	71.287
	Jeko1_CAR_KO_24hrs_Experiment_TCRA_1-1B.fcs	4226	1763	3148	7750	1.11095	70.5627	71.114
	Jeko1_CAR_KO_24hrs_Experiment_TCRA_1-1C.fcs	4090	1601	3330	8163	1.17015	71.8679	71.0258
	Jeko1_CAR_KO_24hrs_Experiment_TCRA_1-2A.fcs	5481	2596	2281	5055	0.724627	67.8594	68.9068
	Jeko1_CAR_KO_24hrs_Experiment_TCRA_1-2B.fcs	5485	2457	2294	4707	0.674742	69.0632	67.2333
	Jeko1_CAR_KO_24hrs_Experiment_TCRA_1-2C.fcs	5942	2027	2235	5370	0.769782	74.5639	70.6114
	Jeko1_CAR_KO_24hrs_Experiment_TCRA_1-4A.fcs	4698	3202	1130	2459	0.352494	59.4684	68.5149
	Jeko1_CAR_KO_24hrs_Experiment_TCRA_1-4B.fcs	5279	2842	1119	2586	0.3707	65.0043	69.7976
	Jeko1_CAR_KO_24hrs_Experiment_TCRA_1-4C.fcs	5518	2501	1195	2480	0.355505	68.8116	67.483
	Jeko1_CAR_KO_24hrs_Experiment_TCRA_2-1A.fcs	2662	788	4153	9615	1.3783	77.1594	69.8359
	Jeko1_CAR_KO_24hrs_Experiment_TCRA_2-1B.fcs	2608	896	4255	9422	1.35063	74.4292	68.8894
	Jeko1_CAR_KO_24hrs_Experiment_TCRA_2-1C.fcs	2425	825	4140	9688	1.38876	74.6154	70.0607
		Jeko1		CAR-T cells
	Sample:	dead cells	live cells	dead cells	live cells
	Jeko1_CAR_KO_24hrs_Experiment_TCRB_1-1A.fcs	3899	2007	2905	8394	1.20327	66.0176	74.2898
	Jeko1_CAR_KO_24hrs_Experiment_TCRB_1-1B.fcs	4151	1744	2661	8484	1.21617	70.4156	76.1238
	Jeko1_CAR_KO_24hrs_Experiment_TCRB_1-1C.fcs	4168	1764	2888	8313	1.19166	70.263	74.2166
	Jeko1_CAR_KO_24hrs_Experiment_TCRB_1-2A.fcs	4731	3075	1895	5603	0.803182	60.6072	74.7266
	Jeko1_CAR_KO_24hrs_Experiment_TCRB_1-2B.fcs	4689	2792	1784	5124	0.734518	62.6788	74.1749
	Jeko1_CAR_KO_24hrs_Experiment_TCRB_1-2C.fcs	4830	2644	2044	5421	0.777093	64.624	72.6189
	Jeko1_CAR_KO_24hrs_Experiment_TCRB_1-4A.fcs	3874	4053	1029	2752	0.394495	48.8709	72.785
	Jeko1_CAR_KO_24hrs_Experiment_TCRB_1-4B.fcs	3968	4006	998	2741	0.392919	49.7617	73.3084
	Jeko1_CAR_KO_24hrs_Experiment_TCRB_1-4C.fcs	4268	3683	976	2676	0.383601	53.6788	73.2749
	Jeko1_CAR_KO_24hrs_Experiment_TCRB_2-1A.fcs	2727	1009	3614	10120	1.45069	72.9925	73.6857
	Jeko1_CAR_KO_24hrs_Experiment_TCRB_2-1B.fcs	2677	886	3919	9803	1.40525	75.1333	71.44
	Jeko1_CAR_KO_24hrs_Experiment_TCRB_2-1C.fcs	2611	900	3514	10262	1.47104	74.3663	74.4919

## Sheet: J-48hrs
		Jeko1		CAR-T cells		Normalized live T cells	Jeko1 dead %	CAR-T cells live %
	Sample:	dead cells	live cells	dead cells	live cells	(to 1:1 WPRE)
	Jeko1_CAR_KO_48hrs_Experiment_Control_1-1A.fcs	3434	3311	1944	8544	1.09333	50.9118	81.4645		CAR-T to B tumor ratio		Control			WPRE			LTR			TCRA			TCRB
	Jeko1_CAR_KO_48hrs_Experiment_Control_1-1B.fcs	3345	3168	1832	8846	1.13197	51.3588	82.8432		_2-1	62.1166	62.8433	62.7056	92	93.4795	92.7304	93.7623	94.5357	93.198	95.158	96.5605	96.0928	96.1209	95.9588	95.5736
	Jeko1_CAR_KO_48hrs_Experiment_Control_1-1C.fcs	3618	2102	1459	8914	1.14068	63.2517	85.9346		_1-1	50.9118	51.3588	63.2517	90.2955	91.4776	88.548	91.3213	92.6618	90.45	94.7532	95.3995	91.6817	93.8934	95.4175	93.1156
	Jeko1_CAR_KO_48hrs_Experiment_Control_1-2A.fcs	4212	5149	1280	6146	0.78647	44.9952	82.7633		_1-2	44.9952	46.2943	46.7679	89.0999	90.2101	91.4644	88.5284	90.2537	92.2083	93.4231	93.64	95.2292	91.0993	92.7794	93.9553
	Jeko1_CAR_KO_48hrs_Experiment_Control_1-2B.fcs	4260	4942	1325	5636	0.721208	46.2943	80.9654		_1-4	40.1473	39.5057	42.0243	89.0643	88.5224	88.515	87.0014	88.2557	87.6239	93.4739	92.1862	93.961	91.8988	89.8058	90.2486
	Jeko1_CAR_KO_48hrs_Experiment_Control_1-2C.fcs	4341	4941	1263	6017	0.769962	46.7679	82.6511
	Jeko1_CAR_KO_48hrs_Experiment_Control_1-4A.fcs	4034	6014	641	2898	0.370841	40.1473	81.8875
	Jeko1_CAR_KO_48hrs_Experiment_Control_1-4B.fcs	3836	5874	626	3133	0.400913	39.5057	83.3466		CAR-T to B tumor ratio		Cntrl T cells			WPRE T cells			LTR T cells			TCRA T cells			TCRB T cells
	Jeko1_CAR_KO_48hrs_Experiment_Control_1-4C.fcs	4260	5877	800	3287	0.420619	42.0243	80.4257		_2-1	1.43307	1.3943	1.40147	1.26352	1.24074	1.25661	1.1806	1.28208	1.20862	1.21643	1.24561	1.23575	1.22296	1.28975	1.26314
	Jeko1_CAR_KO_48hrs_Experiment_Control_2-1A.fcs	2471	1507	2427	11199	1.43307	62.1166	82.1885		_1-1	1.09333	1.13197	1.14068	0.995436	1.0099	0.994668	0.958838	0.976369	0.877069	1.08667	1.0987	1.10152	1.07081	1.07132	1.12532
	Jeko1_CAR_KO_48hrs_Experiment_Control_2-1B.fcs	2586	1529	2613	10896	1.3943	62.8433	80.6573		_1-2	0.78647	0.721208	0.769962	0.563044	0.590044	0.536811	0.515441	0.523887	0.451715	0.760237	0.753455	0.701118	0.733237	0.732853	0.734004
	Jeko1_CAR_KO_48hrs_Experiment_Control_2-1C.fcs	2554	1519	2547	10952	1.40147	62.7056	81.1319		_1-4	0.370841	0.400913	0.420619	0.2169	0.217028	0.243644	0.207047	0.24582	0.258232	0.377751	0.394515	0.422283	0.395538	0.375704	0.415757
		Jeko1		CAR-T cells
	Sample:	dead cells	live cells	dead cells	live cells
	Jeko1_CAR_KO_48hrs_Experiment_WPRE_1-1A.fcs	5164	555	3023	7779	0.995436	90.2955	72.0144
	Jeko1_CAR_KO_48hrs_Experiment_WPRE_1-1B.fcs	5120	477	3020	7892	1.0099	91.4776	72.324
	Jeko1_CAR_KO_48hrs_Experiment_WPRE_1-1C.fcs	5830	754	1841	7773	0.994668	88.548	80.8508
	Jeko1_CAR_KO_48hrs_Experiment_WPRE_1-2A.fcs	7414	907	1830	4400	0.563044	89.0999	70.626
	Jeko1_CAR_KO_48hrs_Experiment_WPRE_1-2B.fcs	7814	848	1977	4611	0.590044	90.2101	69.9909
	Jeko1_CAR_KO_48hrs_Experiment_WPRE_1-2C.fcs	7576	707	1767	4195	0.536811	91.4644	70.3623
	Jeko1_CAR_KO_48hrs_Experiment_WPRE_1-4A.fcs	5359	658	897	1695	0.2169	89.0643	65.3935
	Jeko1_CAR_KO_48hrs_Experiment_WPRE_1-4B.fcs	7890	1023	826	1696	0.217028	88.5224	67.2482
	Jeko1_CAR_KO_48hrs_Experiment_WPRE_1-4C.fcs	7892	1024	999	1904	0.243644	88.515	65.5873
	Jeko1_CAR_KO_48hrs_Experiment_WPRE_2-1A.fcs	3220	280	3199	9874	1.26352	92	75.5297
	Jeko1_CAR_KO_48hrs_Experiment_WPRE_2-1B.fcs	3326	232	3481	9696	1.24074	93.4795	73.5828
	Jeko1_CAR_KO_48hrs_Experiment_WPRE_2-1C.fcs	3240	254	3352	9820	1.25661	92.7304	74.5521
		Jeko1		CAR-T cells
	Sample:	dead cells	live cells	dead cells	live cells
	Jeko1_CAR_KO_48hrs_Experiment_LTR_1-1A.fcs	5619	534	3010	7493	0.958838	91.3213	71.3415
	Jeko1_CAR_KO_48hrs_Experiment_LTR_1-1B.fcs	5657	448	3005	7630	0.976369	92.6618	71.7442
	Jeko1_CAR_KO_48hrs_Experiment_LTR_1-1C.fcs	5929	626	1970	6854	0.877069	90.45	77.6745
	Jeko1_CAR_KO_48hrs_Experiment_LTR_1-2A.fcs	7640	990	1824	4028	0.515441	88.5284	68.8312
	Jeko1_CAR_KO_48hrs_Experiment_LTR_1-2B.fcs	7825	845	1921	4094	0.523887	90.2537	68.0632
	Jeko1_CAR_KO_48hrs_Experiment_LTR_1-2C.fcs	7349	621	1874	3530	0.451715	92.2083	65.322
	Jeko1_CAR_KO_48hrs_Experiment_LTR_1-4A.fcs	7242	1082	876	1618	0.207047	87.0014	64.8757
	Jeko1_CAR_KO_48hrs_Experiment_LTR_1-4B.fcs	7883	1049	934	1921	0.24582	88.2557	67.2855
	Jeko1_CAR_KO_48hrs_Experiment_LTR_1-4C.fcs	7781	1099	1070	2018	0.258232	87.6239	65.3497
	Jeko1_CAR_KO_48hrs_Experiment_LTR_2-1A.fcs	3322	221	3523	9226	1.1806	93.7623	72.3665
	Jeko1_CAR_KO_48hrs_Experiment_LTR_2-1B.fcs	3339	193	3584	10019	1.28208	94.5357	73.6529
	Jeko1_CAR_KO_48hrs_Experiment_LTR_2-1C.fcs	3535	258	3462	9445	1.20862	93.198	73.1773
		Jeko1		CAR-T cells
	Sample:	dead cells	live cells	dead cells	live cells
	Jeko1_CAR_KO_48hrs_Experiment_TCRA_1-1A.fcs	3955	219	3919	8492	1.08667	94.7532	68.4232
	Jeko1_CAR_KO_48hrs_Experiment_TCRA_1-1B.fcs	3857	186	3931	8586	1.0987	95.3995	68.5947
	Jeko1_CAR_KO_48hrs_Experiment_TCRA_1-1C.fcs	4585	416	2742	8608	1.10152	91.6817	75.8414
	Jeko1_CAR_KO_48hrs_Experiment_TCRA_1-2A.fcs	6449	454	2977	5941	0.760237	93.4231	66.6181
	Jeko1_CAR_KO_48hrs_Experiment_TCRA_1-2B.fcs	6493	441	3084	5888	0.753455	93.64	65.6264
	Jeko1_CAR_KO_48hrs_Experiment_TCRA_1-2C.fcs	6647	333	3254	5479	0.701118	95.2292	62.739
	Jeko1_CAR_KO_48hrs_Experiment_TCRA_1-4A.fcs	7849	548	1905	2952	0.377751	93.4739	60.7783
	Jeko1_CAR_KO_48hrs_Experiment_TCRA_1-4B.fcs	7645	648	1720	3083	0.394515	92.1862	64.189
	Jeko1_CAR_KO_48hrs_Experiment_TCRA_1-4C.fcs	7764	499	2108	3300	0.422283	93.961	61.0207
	Jeko1_CAR_KO_48hrs_Experiment_TCRA_2-1A.fcs	2319	118	4495	9506	1.21643	95.158	67.8952
	Jeko1_CAR_KO_48hrs_Experiment_TCRA_2-1B.fcs	2274	81	4535	9734	1.24561	96.5605	68.2178
	Jeko1_CAR_KO_48hrs_Experiment_TCRA_2-1C.fcs	2361	96	4412	9657	1.23575	96.0928	68.6403
		Jeko1		CAR-T cells
	Sample:	dead cells	live cells	dead cells	live cells
	Jeko1_CAR_KO_48hrs_Experiment_TCRB_1-1A.fcs	4582	298	3418	8368	1.07081	93.8934	70.9995
	Jeko1_CAR_KO_48hrs_Experiment_TCRB_1-1B.fcs	4560	219	3473	8372	1.07132	95.4175	70.6796
	Jeko1_CAR_KO_48hrs_Experiment_TCRB_1-1C.fcs	5018	371	2329	8794	1.12532	93.1156	79.0614
	Jeko1_CAR_KO_48hrs_Experiment_TCRB_1-2A.fcs	7185	702	2665	5730	0.733237	91.0993	68.2549
	Jeko1_CAR_KO_48hrs_Experiment_TCRB_1-2B.fcs	7157	557	2686	5727	0.732853	92.7794	68.0732
	Jeko1_CAR_KO_48hrs_Experiment_TCRB_1-2C.fcs	7181	462	2765	5736	0.734004	93.9553	67.4744
	Jeko1_CAR_KO_48hrs_Experiment_TCRB_1-4A.fcs	7589	669	1685	3091	0.395538	91.8988	64.7194
	Jeko1_CAR_KO_48hrs_Experiment_TCRB_1-4B.fcs	7999	908	1407	2936	0.375704	89.8058	67.603
	Jeko1_CAR_KO_48hrs_Experiment_TCRB_1-4C.fcs	8024	867	1753	3249	0.415757	90.2486	64.954
	Jeko1_CAR_KO_48hrs_Experiment_TCRB_2-1A.fcs	2577	104	4357	9557	1.22296	96.1209	68.6862
	Jeko1_CAR_KO_48hrs_Experiment_TCRB_2-1B.fcs	2517	106	4248	10079	1.28975	95.9588	70.3497
	Jeko1_CAR_KO_48hrs_Experiment_TCRB_2-1C.fcs	2591	120	4092	9871	1.26314	95.5736	70.694

## Sheet: J-72hrs
		Jeko1		CAR-T cells		Normalized live T cells	Jeko1 dead %	CAR-T cells live %
	Sample:	dead cells	live cells	dead cells	live cells	(to 1:1 WPRE)
	Jeko1_CAR_KO_72hrs_Experiment_Control_1-1A.fcs	5114	1849	2178	8211	0.801568	73.4454	79.0355		CAR-T to B tumor ratio		Control			WPRE			LTR			TCRA			TCRB
	Jeko1_CAR_KO_72hrs_Experiment_Control_1-1B.fcs	4836	1738	2145	8110	0.791709	73.5625	79.0834		_2-1	79.87	82.4646	82.7641	95.1147	96.2595	95.9512	97.0377	96.5996	97.2161	97.549	97.7384	97.7108	97.8041	96.8851	97.4846
	Jeko1_CAR_KO_72hrs_Experiment_Control_1-1C.fcs	5065	1701	2443	8305	0.810745	74.8596	77.2702		_1-1	73.4454	73.5625	74.8596	95.6402	95.9273	96.4024	96.9705	#DIV/0!	97.1937	97.4477	97.7441	97.6475	98.5583	98.5374	98.3372
	Jeko1_CAR_KO_72hrs_Experiment_Control_1-2A.fcs	6268	3693	1477	5672	0.553708	62.9254	79.3398		_1-2	62.9254	61.3093	63.4313	95.2696	95.2535	95.1413	95.9433	94.6855	96.4664	97.11	97.4614	97.502	97.5311	97.5068	97.4869
	Jeko1_CAR_KO_72hrs_Experiment_Control_1-2B.fcs	6153	3883	1566	5520	0.53887	61.3093	77.9001		_1-4	56.9169	56.2505	59.9693	93.9626	94.6161	95.4701	94.2857	95.0225	95.6489	96.3742	97.1249	97.9997	96.94	96.9625	97.5574
	Jeko1_CAR_KO_72hrs_Experiment_Control_1-2C.fcs	6130	3534	1470	5821	0.568254	63.4313	79.8382
	Jeko1_CAR_KO_72hrs_Experiment_Control_1-4A.fcs	6513	4930	881	3275	0.31971	56.9169	78.8017
	Jeko1_CAR_KO_72hrs_Experiment_Control_1-4B.fcs	6772	5267	894	3285	0.320686	56.2505	78.6073		CAR-T to B tumor ratio		Cntrl T cells			WPRE T cells			LTR T cells			TCRA T cells			TCRB T cells
	Jeko1_CAR_KO_72hrs_Experiment_Control_1-4C.fcs	6635	4429	944	3682	0.359442	59.9693	79.5936		_2-1	1.07383	0.99398	1.07354	1.11728	1.05646	1.09092	1.03127	1.01985	1.08047	1.03869	0.981973	1.04962	1.08574	1.01946	1.09863
	Jeko1_CAR_KO_72hrs_Experiment_Control_2-1A.fcs	3071	774	2710	11000	1.07383	79.87	80.2334		_1-1	0.801568	0.791709	0.810745	0.980899	1.0054	1.0137	0.95542	0	0.949953	0.962936	0.963425	0.984413	0.967329	0.988123	0.99603
	Jeko1_CAR_KO_72hrs_Experiment_Control_2-1B.fcs	3433	730	3201	10182	0.99398	82.4646	76.0816		_1-2	0.553708	0.53887	0.568254	0.811526	0.855163	0.802545	0.681494	0.779018	0.734991	0.827926	0.855944	0.819336	0.767499	0.829586	0.772184
	Jeko1_CAR_KO_72hrs_Experiment_Control_2-1C.fcs	3102	646	2896	10997	1.07354	82.7641	79.155		_1-4	0.31971	0.320686	0.359442	0.548436	0.570304	0.54297	0.385409	0.389216	0.415769	0.630341	0.658358	0.618333	0.508997	0.547851	0.508021
		Jeko1		CAR-T cells
	Sample:	dead cells	live cells	dead cells	live cells
	Jeko1_CAR_KO_72hrs_Experiment_WPRE_1-1A.fcs	3137	143	2928	10048	0.980899	95.6402	77.4353
	Jeko1_CAR_KO_72hrs_Experiment_WPRE_1-1B.fcs	3062	130	2994	10299	1.0054	95.9273	77.4769
	Jeko1_CAR_KO_72hrs_Experiment_WPRE_1-1C.fcs	3028	113	2976	10384	1.0137	96.4024	77.7246
	Jeko1_CAR_KO_72hrs_Experiment_WPRE_1-2A.fcs	4612	229	2421	8313	0.811526	95.2696	77.4455
	Jeko1_CAR_KO_72hrs_Experiment_WPRE_1-2B.fcs	4696	234	2608	8760	0.855163	95.2535	77.0584
	Jeko1_CAR_KO_72hrs_Experiment_WPRE_1-2C.fcs	4680	239	2459	8221	0.802545	95.1413	76.9757
	Jeko1_CAR_KO_72hrs_Experiment_WPRE_1-4A.fcs	6988	449	1974	5618	0.548436	93.9626	73.9989
	Jeko1_CAR_KO_72hrs_Experiment_WPRE_1-4B.fcs	6889	392	2093	5842	0.570304	94.6161	73.6232
	Jeko1_CAR_KO_72hrs_Experiment_WPRE_1-4C.fcs	7250	344	1993	5562	0.54297	95.4701	73.6201
	Jeko1_CAR_KO_72hrs_Experiment_WPRE_2-1A.fcs	1908	98	3121	11445	1.11728	95.1147	78.5734
	Jeko1_CAR_KO_72hrs_Experiment_WPRE_2-1B.fcs	2033	79	3323	10822	1.05646	96.2595	76.5076
	Jeko1_CAR_KO_72hrs_Experiment_WPRE_2-1C.fcs	1967	83	3353	11175	1.09092	95.9512	76.9204
		Jeko1		CAR-T cells
	Sample:	dead cells	live cells	dead cells	live cells
	Jeko1_CAR_KO_72hrs_Experiment_LTR_1-1A.fcs	3585	112	2888	9787	0.95542	96.9705	77.215
	Jeko1_CAR_KO_72hrs_Experiment_LTR_1-1B.fcs	0	0	0	0	0	#DIV/0!	#DIV/0!
	Jeko1_CAR_KO_72hrs_Experiment_LTR_1-1C.fcs	3498	101	2841	9731	0.949953	97.1937	77.4022
	Jeko1_CAR_KO_72hrs_Experiment_LTR_1-2A.fcs	5416	229	2622	6981	0.681494	95.9433	72.696
	Jeko1_CAR_KO_72hrs_Experiment_LTR_1-2B.fcs	5238	294	2348	7980	0.779018	94.6855	77.2657
	Jeko1_CAR_KO_72hrs_Experiment_LTR_1-2C.fcs	5378	197	2301	7529	0.734991	96.4664	76.5921
	Jeko1_CAR_KO_72hrs_Experiment_LTR_1-4A.fcs	7887	478	1867	3948	0.385409	94.2857	67.8934
	Jeko1_CAR_KO_72hrs_Experiment_LTR_1-4B.fcs	7808	409	1659	3987	0.389216	95.0225	70.6164
	Jeko1_CAR_KO_72hrs_Experiment_LTR_1-4C.fcs	7628	347	1755	4259	0.415769	95.6489	70.8181
	Jeko1_CAR_KO_72hrs_Experiment_LTR_2-1A.fcs	2162	66	3088	10564	1.03127	97.0377	77.3806
	Jeko1_CAR_KO_72hrs_Experiment_LTR_2-1B.fcs	2159	76	3350	10447	1.01985	96.5996	75.7194
	Jeko1_CAR_KO_72hrs_Experiment_LTR_2-1C.fcs	2200	63	3287	11068	1.08047	97.2161	77.1021
		Jeko1		CAR-T cells
	Sample:	dead cells	live cells	dead cells	live cells
	Jeko1_CAR_KO_72hrs_Experiment_TCRA_1-1A.fcs	2329	61	3504	9864	0.962936	97.4477	73.7882
	Jeko1_CAR_KO_72hrs_Experiment_TCRA_1-1B.fcs	2383	55	3527	9869	0.963425	97.7441	73.6712
	Jeko1_CAR_KO_72hrs_Experiment_TCRA_1-1C.fcs	2449	59	3490	10084	0.984413	97.6475	74.2891
	Jeko1_CAR_KO_72hrs_Experiment_TCRA_1-2A.fcs	3797	113	2907	8481	0.827926	97.11	74.4731
	Jeko1_CAR_KO_72hrs_Experiment_TCRA_1-2B.fcs	3724	97	2997	8768	0.855944	97.4614	74.5261
	Jeko1_CAR_KO_72hrs_Experiment_TCRA_1-2C.fcs	3591	92	3004	8393	0.819336	97.502	73.6422
	Jeko1_CAR_KO_72hrs_Experiment_TCRA_1-4A.fcs	5449	205	2498	6457	0.630341	96.3742	72.105
	Jeko1_CAR_KO_72hrs_Experiment_TCRA_1-4B.fcs	5709	169	2279	6744	0.658358	97.1249	74.7423
	Jeko1_CAR_KO_72hrs_Experiment_TCRA_1-4C.fcs	5683	116	2484	6334	0.618333	97.9997	71.8303
	Jeko1_CAR_KO_72hrs_Experiment_TCRA_2-1A.fcs	1393	35	3845	10640	1.03869	97.549	73.4553
	Jeko1_CAR_KO_72hrs_Experiment_TCRA_2-1B.fcs	1599	37	4318	10059	0.981973	97.7384	69.9659
	Jeko1_CAR_KO_72hrs_Experiment_TCRA_2-1C.fcs	1622	38	3966	10752	1.04962	97.7108	73.0534
		Jeko1		CAR-T cells
	Sample:	dead cells	live cells	dead cells	live cells
	Jeko1_CAR_KO_72hrs_Experiment_TCRB_1-1A.fcs	3008	44	3378	9909	0.967329	98.5583	74.5767
	Jeko1_CAR_KO_72hrs_Experiment_TCRB_1-1B.fcs	2897	43	3210	10122	0.988123	98.5374	75.9226
	Jeko1_CAR_KO_72hrs_Experiment_TCRB_1-1C.fcs	2957	50	3198	10203	0.99603	98.3372	76.1361
	Jeko1_CAR_KO_72hrs_Experiment_TCRB_1-2A.fcs	4859	123	2812	7862	0.767499	97.5311	73.6556
	Jeko1_CAR_KO_72hrs_Experiment_TCRB_1-2B.fcs	4693	120	2858	8498	0.829586	97.5068	74.8327
	Jeko1_CAR_KO_72hrs_Experiment_TCRB_1-2C.fcs	4849	125	2729	7910	0.772184	97.4869	74.3491
	Jeko1_CAR_KO_72hrs_Experiment_TCRB_1-4A.fcs	7318	231	2272	5214	0.508997	96.94	69.65
	Jeko1_CAR_KO_72hrs_Experiment_TCRB_1-4B.fcs	6959	218	2231	5612	0.547851	96.9625	71.5543
	Jeko1_CAR_KO_72hrs_Experiment_TCRB_1-4C.fcs	7269	182	2226	5204	0.508021	97.5574	70.0404
	Jeko1_CAR_KO_72hrs_Experiment_TCRB_2-1A.fcs	1737	39	3618	11122	1.08574	97.8041	75.4545
	Jeko1_CAR_KO_72hrs_Experiment_TCRB_2-1B.fcs	1804	58	3982	10443	1.01946	96.8851	72.3951
	Jeko1_CAR_KO_72hrs_Experiment_TCRB_2-1C.fcs	1744	45	3671	11254	1.09863	97.4846	75.4037
