# Supplementary material for: Robust T cell activation requires an eIF3-driven burst in T cell receptor translation
Source: eLife journal article supplement (doi:10.7554/elife.74272), 2021-12-31
Supplement: supp [file DeSilva_Figure6-figure-supplement-6B-C.xlsx]

## Sheet: N-24hrs
		NALM6	NALM6	T cells	T cells	Normalized live T cells	NALM6 dead %	CAR-T cells live %
	Sample:	dead cells	live cells	dead cells	live cells	(to 1:1 WPRE)
	24hrs_NALM6_500U_IL2_don2_rep1_kite_Experiment_Control_1-1A.fcs	778	3469	717	7307	1.39544	18.3188	91.0643		CAR-T to B tumor ratio		Control			WPRE			LTR			TCRA			TCRB
	24hrs_NALM6_500U_IL2_don2_rep1_kite_Experiment_Control_1-1B.fcs	825	3736	702	7479	1.42829	18.0881	91.4191		_2-1	19.6928	20.4913	20.9178	35.4217	31.0133	30.1126	40.5849	36.6466	38.1549	40.4889	36.4259	37.2133	51.4138	47.7294	47.4158
	24hrs_NALM6_500U_IL2_don2_rep1_kite_Experiment_Control_1-1C.fcs	791	3383	645	7145	1.3645	18.9506	91.7202		_1-1	18.3188	18.0881	18.9506	26.0267	26.7866	26.5808	26.8434	28.1659	26.714	28.6803	28.9523	28.8419	35.4339	31.7884	32.8261
	24hrs_NALM6_500U_IL2_don2_rep1_kite_Experiment_Control_1-2A.fcs	1067	4372	526	4876	0.931186	19.6176	90.2629		_1-2	19.6176	20.7859	23.1988	24.0824	24.7008	27.0605	22.7202	23.9846	25.4531	30.2077	25.7471	27.0946	28.3333	26.3885	27.5893
	24hrs_NALM6_500U_IL2_don2_rep1_kite_Experiment_Control_1-2B.fcs	1132	4314	442	4685	0.89471	20.7859	91.379		_1-4	22.3295	21.2391	22.3957	25.6802	25.101	26.2028	31.626	25.7909	27.1694	25.3902	26.1834	29.6312	25.4764	26.7096	31.417
	24hrs_NALM6_500U_IL2_don2_rep1_kite_Experiment_Control_1-2C.fcs	1288	4264	452	4802	0.917054	23.1988	91.397
	24hrs_NALM6_500U_IL2_don2_rep1_kite_Experiment_Control_1-4A.fcs	1365	4748	264	2941	0.561653	22.3295	91.7629
	24hrs_NALM6_500U_IL2_don2_rep1_kite_Experiment_Control_1-4B.fcs	1337	4958	268	2912	0.556114	21.2391	91.5723		CAR-T to B tumor ratio		Cntrl T cells			WPRE T cells			LTR T cells			TCRA T cells			TCRB T cells
	24hrs_NALM6_500U_IL2_don2_rep1_kite_Experiment_Control_1-4C.fcs	1348	4671	275	3017	0.576167	22.3957	91.6464		_2-1	1.92864	1.89961	1.90095	1.49418	1.57305	1.46133	1.53638	1.58565	1.54822	1.71971	1.7159	1.64638	1.75734	1.76001	1.73003
	24hrs_NALM6_500U_IL2_don2_rep1_kite_Experiment_Control_2-1A.fcs	577	2353	960	10099	1.92864	19.6928	91.3193		_1-1	1.39544	1.42829	1.3645	1.02514	1.01254	0.962315	1.10917	1.12216	1.04825	1.2843	1.26252	1.21879	1.32058	1.34541	1.3097
	24hrs_NALM6_500U_IL2_don2_rep1_kite_Experiment_Control_2-1B.fcs	609	2363	985	9947	1.89961	20.4913	90.9898		_1-2	0.931186	0.89471	0.917054	0.63575	0.667643	0.687122	0.735438	0.71615	0.756254	0.907696	0.846012	0.889554	0.939207	0.909797	0.966325
	24hrs_NALM6_500U_IL2_don2_rep1_kite_Experiment_Control_2-1C.fcs	588	2223	901	9954	1.90095	20.9178	91.6997		_1-4	0.561653	0.556114	0.576167	0.375263	0.43752	0.413648	0.4591	0.493666	0.46903	0.620663	0.611115	0.608441	0.693615	0.63766	0.646063
	Sample:	dead cells	live cells	dead cells	live cells
	24hrs_NALM6_500U_IL2_don2_rep1_kite_Experiment_Kite_WPRE_1-1A.fcs	1464	4161	1125	5368	1.02514	26.0267	82.6736
	24hrs_NALM6_500U_IL2_don2_rep1_kite_Experiment_Kite_WPRE_1-1B.fcs	1638	4477	1030	5302	1.01254	26.7866	83.7334
	24hrs_NALM6_500U_IL2_don2_rep1_kite_Experiment_Kite_WPRE_1-1C.fcs	1589	4389	962	5039	0.962315	26.5808	83.9693
	24hrs_NALM6_500U_IL2_don2_rep1_kite_Experiment_Kite_WPRE_1-2A.fcs	1660	5233	614	3329	0.63575	24.0824	84.4281
	24hrs_NALM6_500U_IL2_don2_rep1_kite_Experiment_Kite_WPRE_1-2B.fcs	1775	5411	666	3496	0.667643	24.7008	83.9981
	24hrs_NALM6_500U_IL2_don2_rep1_kite_Experiment_Kite_WPRE_1-2C.fcs	1947	5248	789	3598	0.687122	27.0605	82.015
	24hrs_NALM6_500U_IL2_don2_rep1_kite_Experiment_Kite_WPRE_1-4A.fcs	1935	5600	335	1965	0.375263	25.6802	85.4348
	24hrs_NALM6_500U_IL2_don2_rep1_kite_Experiment_Kite_WPRE_1-4B.fcs	1927	5750	373	2291	0.43752	25.101	85.9985
	24hrs_NALM6_500U_IL2_don2_rep1_kite_Experiment_Kite_WPRE_1-4C.fcs	1879	5292	391	2166	0.413648	26.2028	84.7086
	24hrs_NALM6_500U_IL2_don2_rep1_kite_Experiment_Kite_WPRE_2-1A.fcs	1453	2649	1635	7824	1.49418	35.4217	82.7149
	24hrs_NALM6_500U_IL2_don2_rep1_kite_Experiment_Kite_WPRE_2-1B.fcs	1310	2914	1662	8237	1.57305	31.0133	83.2104
	24hrs_NALM6_500U_IL2_don2_rep1_kite_Experiment_Kite_WPRE_2-1C.fcs	1284	2980	1462	7652	1.46133	30.1126	83.9587
	Sample:	dead cells	live cells	dead cells	live cells
	24hrs_NALM6_500U_IL2_don2_rep1_kite_Experiment_Kite-LTR_1-1A.fcs	1529	4167	1239	5808	1.10917	26.8434	82.4181
	24hrs_NALM6_500U_IL2_don2_rep1_kite_Experiment_Kite-LTR_1-1B.fcs	1548	3948	1190	5876	1.12216	28.1659	83.1588
	24hrs_NALM6_500U_IL2_don2_rep1_kite_Experiment_Kite-LTR_1-1C.fcs	1543	4233	1085	5489	1.04825	26.714	83.4956
	24hrs_NALM6_500U_IL2_don2_rep1_kite_Experiment_Kite-LTR_1-2A.fcs	1602	5449	695	3851	0.735438	22.7202	84.7118
	24hrs_NALM6_500U_IL2_don2_rep1_kite_Experiment_Kite-LTR_1-2B.fcs	1683	5334	673	3750	0.71615	23.9846	84.7841
	24hrs_NALM6_500U_IL2_don2_rep1_kite_Experiment_Kite-LTR_1-2C.fcs	1882	5512	854	3960	0.756254	25.4531	82.2601
	24hrs_NALM6_500U_IL2_don2_rep1_kite_Experiment_Kite-LTR_1-4A.fcs	2513	5433	547	2404	0.4591	31.626	81.4639
	24hrs_NALM6_500U_IL2_don2_rep1_kite_Experiment_Kite-LTR_1-4B.fcs	1932	5559	457	2585	0.493666	25.7909	84.977
	24hrs_NALM6_500U_IL2_don2_rep1_kite_Experiment_Kite-LTR_1-4C.fcs	2007	5380	415	2456	0.46903	27.1694	85.5451
	24hrs_NALM6_500U_IL2_don2_rep1_kite_Experiment_Kite-LTR_2-1A.fcs	1582	2316	1878	8045	1.53638	40.5849	81.0743
	24hrs_NALM6_500U_IL2_don2_rep1_kite_Experiment_Kite-LTR_2-1B.fcs	1401	2422	1780	8303	1.58565	36.6466	82.3465
	24hrs_NALM6_500U_IL2_don2_rep1_kite_Experiment_Kite-LTR_2-1C.fcs	1493	2420	1709	8107	1.54822	38.1549	82.5896
	Sample:	dead cells	live cells	dead cells	live cells
	24hrs_NALM6_500U_IL2_don2_rep1_kite_Experiment_Kite-TCRA_1-1A.fcs	1430	3556	1471	6725	1.2843	28.6803	82.0522
	24hrs_NALM6_500U_IL2_don2_rep1_kite_Experiment_Kite-TCRA_1-1B.fcs	1531	3757	1498	6611	1.26252	28.9523	81.5267
	24hrs_NALM6_500U_IL2_don2_rep1_kite_Experiment_Kite-TCRA_1-1C.fcs	1554	3834	1360	6382	1.21879	28.8419	82.4335
	24hrs_NALM6_500U_IL2_don2_rep1_kite_Experiment_Kite-TCRA_1-2A.fcs	1949	4503	1176	4753	0.907696	30.2077	80.1653
	24hrs_NALM6_500U_IL2_don2_rep1_kite_Experiment_Kite-TCRA_1-2B.fcs	1637	4721	1013	4430	0.846012	25.7471	81.3889
	24hrs_NALM6_500U_IL2_don2_rep1_kite_Experiment_Kite-TCRA_1-2C.fcs	1798	4838	1120	4658	0.889554	27.0946	80.6161
	24hrs_NALM6_500U_IL2_don2_rep1_kite_Experiment_Kite-TCRA_1-4A.fcs	1838	5401	732	3250	0.620663	25.3902	81.6173
	24hrs_NALM6_500U_IL2_don2_rep1_kite_Experiment_Kite-TCRA_1-4B.fcs	1853	5224	675	3200	0.611115	26.1834	82.5806
	24hrs_NALM6_500U_IL2_don2_rep1_kite_Experiment_Kite-TCRA_1-4C.fcs	2113	5018	742	3186	0.608441	29.6312	81.11
	24hrs_NALM6_500U_IL2_don2_rep1_kite_Experiment_Kite-TCRA_2-1A.fcs	1292	1899	1952	9005	1.71971	40.4889	82.1849
	24hrs_NALM6_500U_IL2_don2_rep1_kite_Experiment_Kite-TCRA_2-1B.fcs	1170	2042	2044	8985	1.7159	36.4259	81.467
	24hrs_NALM6_500U_IL2_don2_rep1_kite_Experiment_Kite-TCRA_2-1C.fcs	1314	2217	1843	8621	1.64638	37.2133	82.3872
	Sample:	dead cells	live cells	dead cells	live cells
	24hrs_NALM6_500U_IL2_don2_rep1_kite_Experiment_Kite_TCRB_1-1A.fcs	1715	3125	1630	6915	1.32058	35.4339	80.9245
	24hrs_NALM6_500U_IL2_don2_rep1_kite_Experiment_Kite_TCRB_1-1B.fcs	1550	3326	1434	7045	1.34541	31.7884	83.0876
	24hrs_NALM6_500U_IL2_don2_rep1_kite_Experiment_Kite_TCRB_1-1C.fcs	1618	3311	1381	6858	1.3097	32.8261	83.2383
	24hrs_NALM6_500U_IL2_don2_rep1_kite_Experiment_Kite_TCRB_1-2A.fcs	1836	4644	1118	4918	0.939207	28.3333	81.4778
	24hrs_NALM6_500U_IL2_don2_rep1_kite_Experiment_Kite_TCRB_1-2B.fcs	1701	4745	965	4764	0.909797	26.3885	83.1559
	24hrs_NALM6_500U_IL2_don2_rep1_kite_Experiment_Kite_TCRB_1-2C.fcs	1846	4845	1042	5060	0.966325	27.5893	82.9236
	24hrs_NALM6_500U_IL2_don2_rep1_kite_Experiment_Kite_TCRB_1-4A.fcs	1738	5084	785	3632	0.693615	25.4764	82.2278
	24hrs_NALM6_500U_IL2_don2_rep1_kite_Experiment_Kite_TCRB_1-4B.fcs	1906	5230	642	3339	0.63766	26.7096	83.8734
	24hrs_NALM6_500U_IL2_don2_rep1_kite_Experiment_Kite_TCRB_1-4C.fcs	2246	4903	734	3383	0.646063	31.417	82.1715
	24hrs_NALM6_500U_IL2_don2_rep1_kite_Experiment_Kite_TCRB_2-1A.fcs	1691	1598	2125	9202	1.75734	51.4138	81.2395
	24hrs_NALM6_500U_IL2_don2_rep1_kite_Experiment_Kite_TCRB_2-1B.fcs	1524	1669	2383	9216	1.76001	47.7294	79.4551
	24hrs_NALM6_500U_IL2_don2_rep1_kite_Experiment_Kite_TCRB_2-1C.fcs	1633	1811	1877	9059	1.73003	47.4158	82.8365

## Sheet: N-48hrs
		NALM6	NALM6	T cells	T cells	Normalized live T cells	NALM6 dead %	CAR-T cells live %
	Sample:	dead cells	live cells	dead cells	live cells	(to 1:1 WPRE)
	48hrs_NALM6_500U_IL2_don2_rep1_kite(1)_Experiment_Control_1-1A.fcs	1393	2396	725	8951	1.62676	36.7643	92.5072		CAR-T to B tumor ratio		Control			WPRE			LTR			TCRA			TCRB
	48hrs_NALM6_500U_IL2_don2_rep1_kite(1)_Experiment_Control_1-1B.fcs	1347	2320	730	8841	1.60677	36.733	92.3728		_2-1	35.6664	36.2997	37.9165	64.1886	62.6289	62.7214	76.2179	74.0823	74.4265	78.75	73.1504	73.6015	83.7474	83.6176	83.8465
	48hrs_NALM6_500U_IL2_don2_rep1_kite(1)_Experiment_Control_1-1C.fcs	1260	2316	695	8952	1.62695	35.2349	92.7957		_1-1	36.7643	36.733	35.2349	44.4557	41.6163	42.2757	50.5916	47.9767	48.002	58.5432	52.8681	53.73	67.2481	63.7359	63.0802
	48hrs_NALM6_500U_IL2_don2_rep1_kite(1)_Experiment_Control_1-2A.fcs	1869	3308	504	6145	1.1168	36.102	92.4199		_1-2	36.102	35.0906	36.2138	37.5414	38.4154	38.6374	38.631	40.7511	41.0161	41.2897	39.5493	43.7268	44.7501	46.6768	49.9373
	48hrs_NALM6_500U_IL2_don2_rep1_kite(1)_Experiment_Control_1-2B.fcs	1704	3152	496	6072	1.10353	35.0906	92.4482		_1-4	35.0053	39.3059	39.2628	39.4547	40.5605	43.1358	40.1175	44.7254	45.565	39.069	45.1552	46.7944	41.7943	47.8958	49.0258
	48hrs_NALM6_500U_IL2_don2_rep1_kite(1)_Experiment_Control_1-2C.fcs	1626	2864	530	5939	1.07936	36.2138	91.8071
	48hrs_NALM6_500U_IL2_don2_rep1_kite(1)_Experiment_Control_1-4A.fcs	1975	3667	329	3793	0.689344	35.0053	92.0184
	48hrs_NALM6_500U_IL2_don2_rep1_kite(1)_Experiment_Control_1-4B.fcs	2367	3655	382	3994	0.725874	39.3059	91.2706		CAR-T to B tumor ratio		Cntrl T cells			WPRE T cells			LTR T cells			TCRA T cells			TCRB T cells
	48hrs_NALM6_500U_IL2_don2_rep1_kite(1)_Experiment_Control_1-4C.fcs	2141	3312	268	3547	0.644636	39.2628	92.9751		_2-1	2.11292	2.12255	2.12764	1.28836	1.40995	1.30854	1.36524	1.4323	1.35452	1.41958	1.46538	1.37887	1.52663	1.55225	1.49482
	48hrs_NALM6_500U_IL2_don2_rep1_kite(1)_Experiment_Control_2-1A.fcs	851	1535	916	11626	2.11292	35.6664	92.6965		_1-1	1.62676	1.60677	1.62695	1.03193	0.992488	0.975586	1.08027	1.06282	0.994851	1.10608	1.11026	1.10008	1.16405	1.20676	1.20422
	48hrs_NALM6_500U_IL2_don2_rep1_kite(1)_Experiment_Control_2-1B.fcs	877	1539	979	11679	2.12255	36.2997	92.2658		_1-2	1.1168	1.10353	1.07936	0.692979	0.644636	0.65245	0.761859	0.715151	0.708972	0.881626	0.799479	0.863997	0.971588	0.919246	0.880536
	48hrs_NALM6_500U_IL2_don2_rep1_kite(1)_Experiment_Control_2-1C.fcs	899	1472	906	11707	2.12764	37.9165	92.8169		_1-4	0.689344	0.725874	0.644636	0.438723	0.447628	0.360574	0.496698	0.520688	0.445266	0.62628	0.653904	0.575029	0.659538	0.702066	0.585388
	Sample:	dead cells	live cells	dead cells	live cells
	48hrs_NALM6_500U_IL2_don2_rep1_kite(1)_Experiment_Kite_WPRE_1-1A.fcs	1752	2189	1811	5678	1.03193	44.4557	75.8179
	48hrs_NALM6_500U_IL2_don2_rep1_kite(1)_Experiment_Kite_WPRE_1-1B.fcs	1720	2413	1558	5461	0.992488	41.6163	77.8031
	48hrs_NALM6_500U_IL2_don2_rep1_kite(1)_Experiment_Kite_WPRE_1-1C.fcs	1828	2496	1537	5368	0.975586	42.2757	77.7408
	48hrs_NALM6_500U_IL2_don2_rep1_kite(1)_Experiment_Kite_WPRE_1-2A.fcs	2153	3582	1188	3813	0.692979	37.5414	76.2448
	48hrs_NALM6_500U_IL2_don2_rep1_kite(1)_Experiment_Kite_WPRE_1-2B.fcs	2308	3700	1124	3547	0.644636	38.4154	75.9366
	48hrs_NALM6_500U_IL2_don2_rep1_kite(1)_Experiment_Kite_WPRE_1-2C.fcs	2467	3918	1091	3590	0.65245	38.6374	76.693
	48hrs_NALM6_500U_IL2_don2_rep1_kite(1)_Experiment_Kite_WPRE_1-4A.fcs	2793	4286	675	2414	0.438723	39.4547	78.1483
	48hrs_NALM6_500U_IL2_don2_rep1_kite(1)_Experiment_Kite_WPRE_1-4B.fcs	3025	4433	807	2463	0.447628	40.5605	75.3211
	48hrs_NALM6_500U_IL2_don2_rep1_kite(1)_Experiment_Kite_WPRE_1-4C.fcs	2919	3848	708	1984	0.360574	43.1358	73.6999
	48hrs_NALM6_500U_IL2_don2_rep1_kite(1)_Experiment_Kite_WPRE_2-1A.fcs	1606	896	1937	7089	1.28836	64.1886	78.5398
	48hrs_NALM6_500U_IL2_don2_rep1_kite(1)_Experiment_Kite_WPRE_2-1B.fcs	1458	870	2031	7758	1.40995	62.6289	79.2522
	48hrs_NALM6_500U_IL2_don2_rep1_kite(1)_Experiment_Kite_WPRE_2-1C.fcs	1558	926	1971	7200	1.30854	62.7214	78.5083
	Sample:	dead cells	live cells	dead cells	live cells
	48hrs_NALM6_500U_IL2_don2_rep1_kite(1)_Experiment_Kite-LTR_1-1A.fcs	1967	1921	1874	5944	1.08027	50.5916	76.0297
	48hrs_NALM6_500U_IL2_don2_rep1_kite(1)_Experiment_Kite-LTR_1-1B.fcs	1980	2147	1702	5848	1.06282	47.9767	77.457
	48hrs_NALM6_500U_IL2_don2_rep1_kite(1)_Experiment_Kite-LTR_1-1C.fcs	1946	2108	1713	5474	0.994851	48.002	76.1653
	48hrs_NALM6_500U_IL2_don2_rep1_kite(1)_Experiment_Kite-LTR_1-2A.fcs	2280	3622	1322	4192	0.761859	38.631	76.0247
	48hrs_NALM6_500U_IL2_don2_rep1_kite(1)_Experiment_Kite-LTR_1-2B.fcs	2322	3376	1114	3935	0.715151	40.7511	77.9362
	48hrs_NALM6_500U_IL2_don2_rep1_kite(1)_Experiment_Kite-LTR_1-2C.fcs	2317	3332	1083	3901	0.708972	41.0161	78.2705
	48hrs_NALM6_500U_IL2_don2_rep1_kite(1)_Experiment_Kite-LTR_1-4A.fcs	2527	3772	827	2733	0.496698	40.1175	76.7697
	48hrs_NALM6_500U_IL2_don2_rep1_kite(1)_Experiment_Kite-LTR_1-4B.fcs	3078	3804	876	2865	0.520688	44.7254	76.5838
	48hrs_NALM6_500U_IL2_don2_rep1_kite(1)_Experiment_Kite-LTR_1-4C.fcs	2964	3541	723	2450	0.445266	45.565	77.214
	48hrs_NALM6_500U_IL2_don2_rep1_kite(1)_Experiment_Kite-LTR_2-1A.fcs	1721	537	2133	7512	1.36524	76.2179	77.8849
	48hrs_NALM6_500U_IL2_don2_rep1_kite(1)_Experiment_Kite-LTR_2-1B.fcs	1675	586	2151	7881	1.4323	74.0823	78.5586
	48hrs_NALM6_500U_IL2_don2_rep1_kite(1)_Experiment_Kite-LTR_2-1C.fcs	1752	602	2138	7453	1.35452	74.4265	77.7083
	Sample:	dead cells	live cells	dead cells	live cells
	48hrs_NALM6_500U_IL2_don2_rep1_kite(1)_Experiment_Kite-TCRA_1-1A.fcs	1720	1218	2343	6086	1.10608	58.5432	72.2031
	48hrs_NALM6_500U_IL2_don2_rep1_kite(1)_Experiment_Kite-TCRA_1-1B.fcs	1788	1594	1875	6109	1.11026	52.8681	76.5155
	48hrs_NALM6_500U_IL2_don2_rep1_kite(1)_Experiment_Kite-TCRA_1-1C.fcs	1815	1563	1901	6053	1.10008	53.73	76.1001
	48hrs_NALM6_500U_IL2_don2_rep1_kite(1)_Experiment_Kite-TCRA_1-2A.fcs	2017	2868	1578	4851	0.881626	41.2897	75.455
	48hrs_NALM6_500U_IL2_don2_rep1_kite(1)_Experiment_Kite-TCRA_1-2B.fcs	2106	3219	1391	4399	0.799479	39.5493	75.9758
	48hrs_NALM6_500U_IL2_don2_rep1_kite(1)_Experiment_Kite-TCRA_1-2C.fcs	2119	2727	1483	4754	0.863997	43.7268	76.2225
	48hrs_NALM6_500U_IL2_don2_rep1_kite(1)_Experiment_Kite-TCRA_1-4A.fcs	2434	3796	1029	3446	0.62628	39.069	77.0056
	48hrs_NALM6_500U_IL2_don2_rep1_kite(1)_Experiment_Kite-TCRA_1-4B.fcs	2647	3215	1300	3598	0.653904	45.1552	73.4586
	48hrs_NALM6_500U_IL2_don2_rep1_kite(1)_Experiment_Kite-TCRA_1-4C.fcs	2832	3220	1016	3164	0.575029	46.7944	75.6938
	48hrs_NALM6_500U_IL2_don2_rep1_kite(1)_Experiment_Kite-TCRA_2-1A.fcs	1575	425	2275	7811	1.41958	78.75	77.444
	48hrs_NALM6_500U_IL2_don2_rep1_kite(1)_Experiment_Kite-TCRA_2-1B.fcs	1493	548	2206	8063	1.46538	73.1504	78.5179
	48hrs_NALM6_500U_IL2_don2_rep1_kite(1)_Experiment_Kite-TCRA_2-1C.fcs	1592	571	2210	7587	1.37887	73.6015	77.4421
	Sample:	dead cells	live cells	dead cells	live cells
	48hrs_NALM6_500U_IL2_don2_rep1_kite(1)_Experiment_Kite_TCRB_1-1A.fcs	2236	1089	2083	6405	1.16405	67.2481	75.4595
	48hrs_NALM6_500U_IL2_don2_rep1_kite(1)_Experiment_Kite_TCRB_1-1B.fcs	2211	1258	2064	6640	1.20676	63.7359	76.2868
	48hrs_NALM6_500U_IL2_don2_rep1_kite(1)_Experiment_Kite_TCRB_1-1C.fcs	2093	1225	1989	6626	1.20422	63.0802	76.9124
	48hrs_NALM6_500U_IL2_don2_rep1_kite(1)_Experiment_Kite_TCRB_1-2A.fcs	2131	2631	1694	5346	0.971588	44.7501	75.9375
	48hrs_NALM6_500U_IL2_don2_rep1_kite(1)_Experiment_Kite_TCRB_1-2B.fcs	2149	2455	1632	5058	0.919246	46.6768	75.6054
	48hrs_NALM6_500U_IL2_don2_rep1_kite(1)_Experiment_Kite_TCRB_1-2C.fcs	2391	2397	1548	4845	0.880536	49.9373	75.786
	48hrs_NALM6_500U_IL2_don2_rep1_kite(1)_Experiment_Kite_TCRB_1-4A.fcs	2483	3458	1114	3629	0.659538	41.7943	76.5128
	48hrs_NALM6_500U_IL2_don2_rep1_kite(1)_Experiment_Kite_TCRB_1-4B.fcs	2959	3219	1353	3863	0.702066	47.8958	74.0606
	48hrs_NALM6_500U_IL2_don2_rep1_kite(1)_Experiment_Kite_TCRB_1-4C.fcs	2793	2904	1432	3221	0.585388	49.0258	69.2242
	48hrs_NALM6_500U_IL2_don2_rep1_kite(1)_Experiment_Kite_TCRB_2-1A.fcs	1618	314	2230	8400	1.52663	83.7474	79.0216
	48hrs_NALM6_500U_IL2_don2_rep1_kite(1)_Experiment_Kite_TCRB_2-1B.fcs	1618	317	2187	8541	1.55225	83.6176	79.6141
	48hrs_NALM6_500U_IL2_don2_rep1_kite(1)_Experiment_Kite_TCRB_2-1C.fcs	1661	320	2258	8225	1.49482	83.8465	78.4604

## Sheet: N-72hrs
		NALM6	NALM6	T cells	T cells	Normalized live T cells	NALM6 dead %	CAR-T cells live %
	Sample:	dead cells	live cells	dead cells	live cells	(to 1:1 WPRE)
	72hrs_NALM6_500U_IL2_don2_rep1_kite_Experiment_Control_1-1A.fcs	1496	881	869	10067	1.18213	62.9365	92.0538		CAR-T to B tumor ratio		Control			WPRE			LTR			TCRA			TCRB
	72hrs_NALM6_500U_IL2_don2_rep1_kite_Experiment_Control_1-1B.fcs	1484	939	893	9841	1.15559	61.2464	91.6806		_2-1	68.822	63.0371	62.7033	91.5767	87.739	89.6552	93.1996	92.6514	93.3082	94.3713	94.4282	94.715	95.1025	94.7217	96.3311
	72hrs_NALM6_500U_IL2_don2_rep1_kite_Experiment_Control_1-1C.fcs	1366	906	827	9863	1.15817	60.1232	92.2638		_1-1	62.9365	61.2464	60.1232	80.6416	80.2367	80.3325	85.5775	86.2656	86.1376	88.7662	88.6036	89.9329	92.5373	91.4304	92.4646
	72hrs_NALM6_500U_IL2_don2_rep1_kite_Experiment_Control_1-2A.fcs	2017	1216	580	7209	0.846524	62.3879	92.5536		_1-2	62.3879	65.4033	66.2755	66.9173	69.5475	69.2381	75.4899	78.1629	76.6436	80.2141	83.5299	80.4584	86.1406	85.2486	86.8899
	72hrs_NALM6_500U_IL2_don2_rep1_kite_Experiment_Control_1-2B.fcs	2019	1068	722	7390	0.867778	65.4033	91.0996		_1-4	64.5144	64.8931	66.246	62.8057	62.9578	69.9316	66.2648	69.1522	73.9326	72.5695	75.216	74.8605	78.3924	78.8248	79.6734
	72hrs_NALM6_500U_IL2_don2_rep1_kite_Experiment_Control_1-2C.fcs	2146	1092	698	7148	0.839361	66.2755	91.1037
	72hrs_NALM6_500U_IL2_don2_rep1_kite_Experiment_Control_1-4A.fcs	2418	1330	413	4453	0.522898	64.5144	91.5125
	72hrs_NALM6_500U_IL2_don2_rep1_kite_Experiment_Control_1-4B.fcs	2610	1412	447	4895	0.5748	64.8931	91.6323		CAR-T to B tumor ratio		Cntrl T cells			WPRE T cells			LTR T cells			TCRA T cells			TCRB T cells
	72hrs_NALM6_500U_IL2_don2_rep1_kite_Experiment_Control_1-4C.fcs	2677	1364	367	4477	0.525716	66.246	92.4236		_2-1	1.42637	1.39361	1.40254	1.24295	1.17508	1.23039	1.26221	1.21653	1.21054	1.283	1.24436	1.22346	1.2426	1.22428	1.20961
	72hrs_NALM6_500U_IL2_don2_rep1_kite_Experiment_Control_2-1A.fcs	1075	487	1268	12147	1.42637	68.822	90.5479		_1-1	1.18213	1.15559	1.15817	1.04028	1.01174	0.94798	0.949272	0.974753	0.921559	1.07832	1.05871	0.995773	1.00188	0.99131	0.941757
	72hrs_NALM6_500U_IL2_don2_rep1_kite_Experiment_Control_2-1B.fcs	1071	628	1227	11868	1.39361	63.0371	90.63		_1-2	0.846524	0.867778	0.839361	0.728041	0.724871	0.695397	0.688821	0.673203	0.686003	0.865312	0.846994	0.82116	0.738845	0.744481	0.728276
	72hrs_NALM6_500U_IL2_don2_rep1_kite_Experiment_Control_2-1C.fcs	1118	665	1202	11944	1.40254	62.7033	90.8565		_1-4	0.522898	0.5748	0.525716	0.499883	0.515383	0.467356	0.462659	0.472522	0.421559	0.643142	0.627407	0.604744	0.51139	0.499178	0.44845
	Sample:	dead cells	live cells	dead cells	live cells
	72hrs_NALM6_500U_IL2_don2_rep1_kite_Experiment_Kite_WPRE_1-1A.fcs	1458	350	2337	8859	1.04028	80.6416	79.1265
	72hrs_NALM6_500U_IL2_don2_rep1_kite_Experiment_Kite_WPRE_1-1B.fcs	1559	384	2327	8616	1.01174	80.2367	78.7353
	72hrs_NALM6_500U_IL2_don2_rep1_kite_Experiment_Kite_WPRE_1-1C.fcs	1691	414	2446	8073	0.94798	80.3325	76.7468
	72hrs_NALM6_500U_IL2_don2_rep1_kite_Experiment_Kite_WPRE_1-2A.fcs	2225	1100	1811	6200	0.728041	66.9173	77.3936
	72hrs_NALM6_500U_IL2_don2_rep1_kite_Experiment_Kite_WPRE_1-2B.fcs	2213	969	2007	6173	0.724871	69.5475	75.4645
	72hrs_NALM6_500U_IL2_don2_rep1_kite_Experiment_Kite_WPRE_1-2C.fcs	2181	969	1966	5922	0.695397	69.2381	75.0761
	72hrs_NALM6_500U_IL2_don2_rep1_kite_Experiment_Kite_WPRE_1-4A.fcs	2722	1612	1392	4257	0.499883	62.8057	75.3585
	72hrs_NALM6_500U_IL2_don2_rep1_kite_Experiment_Kite_WPRE_1-4B.fcs	2716	1598	1372	4389	0.515383	62.9578	76.1847
	72hrs_NALM6_500U_IL2_don2_rep1_kite_Experiment_Kite_WPRE_1-4C.fcs	2863	1231	1754	3980	0.467356	69.9316	69.4105
	72hrs_NALM6_500U_IL2_don2_rep1_kite_Experiment_Kite_WPRE_2-1A.fcs	848	78	2430	10585	1.24295	91.5767	81.3292
	72hrs_NALM6_500U_IL2_don2_rep1_kite_Experiment_Kite_WPRE_2-1B.fcs	780	109	2074	10007	1.17508	87.739	82.8325
	72hrs_NALM6_500U_IL2_don2_rep1_kite_Experiment_Kite_WPRE_2-1C.fcs	962	111	2502	10478	1.23039	89.6552	80.7242
	Sample:	dead cells	live cells	dead cells	live cells
	72hrs_NALM6_500U_IL2_don2_rep1_kite_Experiment_Kite-LTR_1-1A.fcs	1430	241	2452	8084	0.949272	85.5775	76.7274
	72hrs_NALM6_500U_IL2_don2_rep1_kite_Experiment_Kite-LTR_1-1B.fcs	1520	242	2484	8301	0.974753	86.2656	76.968
	72hrs_NALM6_500U_IL2_don2_rep1_kite_Experiment_Kite-LTR_1-1C.fcs	1715	276	2384	7848	0.921559	86.1376	76.7005
	72hrs_NALM6_500U_IL2_don2_rep1_kite_Experiment_Kite-LTR_1-2A.fcs	2196	713	2041	5866	0.688821	75.4899	74.1874
	72hrs_NALM6_500U_IL2_don2_rep1_kite_Experiment_Kite-LTR_1-2B.fcs	2323	649	2150	5733	0.673203	78.1629	72.7261
	72hrs_NALM6_500U_IL2_don2_rep1_kite_Experiment_Kite-LTR_1-2C.fcs	2215	675	2038	5842	0.686003	76.6436	74.1371
	72hrs_NALM6_500U_IL2_don2_rep1_kite_Experiment_Kite-LTR_1-4A.fcs	2748	1399	1392	3940	0.462659	66.2648	73.8935
	72hrs_NALM6_500U_IL2_don2_rep1_kite_Experiment_Kite-LTR_1-4B.fcs	2504	1117	1490	4024	0.472522	69.1522	72.9779
	72hrs_NALM6_500U_IL2_don2_rep1_kite_Experiment_Kite-LTR_1-4C.fcs	3117	1099	1441	3590	0.421559	73.9326	71.3576
	72hrs_NALM6_500U_IL2_don2_rep1_kite_Experiment_Kite-LTR_2-1A.fcs	836	61	2420	10749	1.26221	93.1996	81.6235
	72hrs_NALM6_500U_IL2_don2_rep1_kite_Experiment_Kite-LTR_2-1B.fcs	933	74	2515	10360	1.21653	92.6514	80.466
	72hrs_NALM6_500U_IL2_don2_rep1_kite_Experiment_Kite-LTR_2-1C.fcs	990	71	2503	10309	1.21054	93.3082	80.4636
	Sample:	dead cells	live cells	dead cells	live cells
	72hrs_NALM6_500U_IL2_don2_rep1_kite_Experiment_Kite-TCRA_1-1A.fcs	1367	173	2539	9183	1.07832	88.7662	78.3399
	72hrs_NALM6_500U_IL2_don2_rep1_kite_Experiment_Kite-TCRA_1-1B.fcs	1415	182	2558	9016	1.05871	88.6036	77.8987
	72hrs_NALM6_500U_IL2_don2_rep1_kite_Experiment_Kite-TCRA_1-1C.fcs	1474	165	2681	8480	0.995773	89.9329	75.9789
	72hrs_NALM6_500U_IL2_don2_rep1_kite_Experiment_Kite-TCRA_1-2A.fcs	1873	462	2203	7369	0.865312	80.2141	76.985
	72hrs_NALM6_500U_IL2_don2_rep1_kite_Experiment_Kite-TCRA_1-2B.fcs	1983	391	2375	7213	0.846994	83.5299	75.2295
	72hrs_NALM6_500U_IL2_don2_rep1_kite_Experiment_Kite-TCRA_1-2C.fcs	2071	503	2198	6993	0.82116	80.4584	76.0853
	72hrs_NALM6_500U_IL2_don2_rep1_kite_Experiment_Kite-TCRA_1-4A.fcs	2426	917	1943	5477	0.643142	72.5695	73.814
	72hrs_NALM6_500U_IL2_don2_rep1_kite_Experiment_Kite-TCRA_1-4B.fcs	2525	832	1860	5343	0.627407	75.216	74.1774
	72hrs_NALM6_500U_IL2_don2_rep1_kite_Experiment_Kite-TCRA_1-4C.fcs	2415	811	2180	5150	0.604744	74.8605	70.2592
	72hrs_NALM6_500U_IL2_don2_rep1_kite_Experiment_Kite-TCRA_2-1A.fcs	788	47	2388	10926	1.283	94.3713	82.064
	72hrs_NALM6_500U_IL2_don2_rep1_kite_Experiment_Kite-TCRA_2-1B.fcs	966	57	2488	10597	1.24436	94.4282	80.9859
	72hrs_NALM6_500U_IL2_don2_rep1_kite_Experiment_Kite-TCRA_2-1C.fcs	914	51	2716	10419	1.22346	94.715	79.3224
	Sample:	dead cells	live cells	dead cells	live cells
	72hrs_NALM6_500U_IL2_don2_rep1_kite_Experiment_Kite_TCRB_1-1A.fcs	1426	115	2356	8532	1.00188	92.5373	78.3615
	72hrs_NALM6_500U_IL2_don2_rep1_kite_Experiment_Kite_TCRB_1-1B.fcs	1419	133	2541	8442	0.99131	91.4304	76.8642
	72hrs_NALM6_500U_IL2_don2_rep1_kite_Experiment_Kite_TCRB_1-1C.fcs	1632	133	2557	8020	0.941757	92.4646	75.8249
	72hrs_NALM6_500U_IL2_don2_rep1_kite_Experiment_Kite_TCRB_1-2A.fcs	2107	339	2290	6292	0.738845	86.1406	73.3162
	72hrs_NALM6_500U_IL2_don2_rep1_kite_Experiment_Kite_TCRB_1-2B.fcs	2092	362	2323	6340	0.744481	85.2486	73.1848
	72hrs_NALM6_500U_IL2_don2_rep1_kite_Experiment_Kite_TCRB_1-2C.fcs	2154	325	2266	6202	0.728276	86.8899	73.2404
	72hrs_NALM6_500U_IL2_don2_rep1_kite_Experiment_Kite_TCRB_1-4A.fcs	2721	750	1800	4355	0.51139	78.3924	70.7555
	72hrs_NALM6_500U_IL2_don2_rep1_kite_Experiment_Kite_TCRB_1-4B.fcs	2844	764	2008	4251	0.499178	78.8248	67.9182
	72hrs_NALM6_500U_IL2_don2_rep1_kite_Experiment_Kite_TCRB_1-4C.fcs	2830	722	1850	3819	0.44845	79.6734	67.3664
	72hrs_NALM6_500U_IL2_don2_rep1_kite_Experiment_Kite_TCRB_2-1A.fcs	835	43	2433	10582	1.2426	95.1025	81.3062
	72hrs_NALM6_500U_IL2_don2_rep1_kite_Experiment_Kite_TCRB_2-1B.fcs	987	55	2481	10426	1.22428	94.7217	80.7779
	72hrs_NALM6_500U_IL2_don2_rep1_kite_Experiment_Kite_TCRB_2-1C.fcs	1024	39	2540	10301	1.20961	96.3311	80.2196

## Sheet: J-24hrs
		Jeko1	Jeko1	T cells	T cells	Normalized live T cells	Jeko1 dead %	CAR-T cells live %
	Sample:	dead cells	live cells	dead cells	live cells	(to 1:1 WPRE)
	24hrs_Jeko1_500U_IL2_don2_rep1_kite_Experiment_Control_1-1A.fcs	753	3538	799	8451	1.45732	17.5484	91.3622		CAR-T to B tumor ratio		Control			WPRE			LTR			TCRA			TCRB
	24hrs_Jeko1_500U_IL2_don2_rep1_kite_Experiment_Control_1-1B.fcs	787	3523	853	8346	1.43921	18.2599	90.7273		_2-1	16.3512	16.5457	19.028	39.5522	36.6738	41.6832	37.6328	41.4966	40.9642	35.6979	37.0094	40.6562	36.3572	37.462	39.9932
	24hrs_Jeko1_500U_IL2_don2_rep1_kite_Experiment_Control_1-1C.fcs	906	3547	803	8368	1.44301	20.3458	91.2441		_1-1	17.5484	18.2599	20.3458	48.1352	53.8785	54.9223	51.5194	51.6037	57.764	53.1995	53.939	59.7922	53.9702	56.7134	58.2863
	24hrs_Jeko1_500U_IL2_don2_rep1_kite_Experiment_Control_1-2A.fcs	1160	4672	563	5746	0.99086	19.8903	91.0762		_1-2	19.8903	20.223	19.9615	55.6977	56.5117	58.8914	59.6767	60.1617	64.1991	63.6147	63.4969	67.8817	65.0796	65.8107	68.0097
	24hrs_Jeko1_500U_IL2_don2_rep1_kite_Experiment_Control_1-2B.fcs	1088	4292	471	5225	0.901017	20.223	91.731		_1-4	17.098	17.4842	20.1642	46.3483	46.1192	48.2379	48.534	50.7133	53.4709	62.3149	63.1321	68.7086	65.4413	66.2686	68.7125
	24hrs_Jeko1_500U_IL2_don2_rep1_kite_Experiment_Control_1-2C.fcs	1142	4579	531	5499	0.948267	19.9615	91.194
	24hrs_Jeko1_500U_IL2_don2_rep1_kite_Experiment_Control_1-4A.fcs	1110	5382	313	3336	0.575272	17.098	91.4223
	24hrs_Jeko1_500U_IL2_don2_rep1_kite_Experiment_Control_1-4B.fcs	1301	6140	307	3461	0.596827	17.4842	91.8524		CAR-T to B tumor ratio		Cntrl T cells			WPRE T cells			LTR T cells			TCRA T cells			TCRB T cells
	24hrs_Jeko1_500U_IL2_don2_rep1_kite_Experiment_Control_1-4C.fcs	1326	5250	308	3412	0.588377	20.1642	91.7204		_2-1	1.92619	1.95689	1.98551	1.60114	1.57544	1.56337	1.48784	1.60786	1.61666	1.60924	1.62838	1.61062	1.6389	1.6796	1.68822
	24hrs_Jeko1_500U_IL2_don2_rep1_kite_Experiment_Control_2-1A.fcs	432	2210	1154	11170	1.92619	16.3512	90.6362		_1-1	1.45732	1.43921	1.44301	0.9781	1.0138	1.0081	1.09622	1.07363	1.06087	1.23245	1.20814	1.19038	1.23711	1.26746	1.24159
	24hrs_Jeko1_500U_IL2_don2_rep1_kite_Experiment_Control_2-1B.fcs	433	2184	1118	11348	1.95689	16.5457	91.0316		_1-2	0.99086	0.901017	0.948267	0.599414	0.531471	0.615796	0.60976	0.519572	0.637869	0.765304	0.679945	0.771685	0.78479	0.755475	0.791688
	24hrs_Jeko1_500U_IL2_don2_rep1_kite_Experiment_Control_2-1C.fcs	509	2166	1058	11514	1.98551	19.028	91.5845		_1-4	0.575272	0.596827	0.588377	0.362131	0.360752	0.351612	0.363683	0.39024	0.369374	0.509053	0.549233	0.494913	0.519227	0.56527	0.526298
	Sample:	dead cells	live cells	dead cells	live cells
	24hrs_Jeko1_500U_IL2_don2_rep1_kite_Experiment_Kite_WPRE_1-1A.fcs	2478	2670	1050	5672	0.9781	48.1352	84.3796
	24hrs_Jeko1_500U_IL2_don2_rep1_kite_Experiment_Kite_WPRE_1-1B.fcs	2945	2521	1152	5879	1.0138	53.8785	83.6154
	24hrs_Jeko1_500U_IL2_don2_rep1_kite_Experiment_Kite_WPRE_1-1C.fcs	3074	2523	1104	5846	1.0081	54.9223	84.1151
	24hrs_Jeko1_500U_IL2_don2_rep1_kite_Experiment_Kite_WPRE_1-2A.fcs	3656	2908	701	3476	0.599414	55.6977	83.2176
	24hrs_Jeko1_500U_IL2_don2_rep1_kite_Experiment_Kite_WPRE_1-2B.fcs	3441	2648	594	3082	0.531471	56.5117	83.8411
	24hrs_Jeko1_500U_IL2_don2_rep1_kite_Experiment_Kite_WPRE_1-2C.fcs	3676	2566	690	3571	0.615796	58.8914	83.8066
	24hrs_Jeko1_500U_IL2_don2_rep1_kite_Experiment_Kite_WPRE_1-4A.fcs	3154	3651	395	2100	0.362131	46.3483	84.1683
	24hrs_Jeko1_500U_IL2_don2_rep1_kite_Experiment_Kite_WPRE_1-4B.fcs	3375	3943	409	2092	0.360752	46.1192	83.6465
	24hrs_Jeko1_500U_IL2_don2_rep1_kite_Experiment_Kite_WPRE_1-4C.fcs	3285	3525	450	2039	0.351612	48.2379	81.9204
	24hrs_Jeko1_500U_IL2_don2_rep1_kite_Experiment_Kite_WPRE_2-1A.fcs	1113	1701	2184	9285	1.60114	39.5522	80.9574
	24hrs_Jeko1_500U_IL2_don2_rep1_kite_Experiment_Kite_WPRE_2-1B.fcs	1193	2060	1769	9136	1.57544	36.6738	83.7781
	24hrs_Jeko1_500U_IL2_don2_rep1_kite_Experiment_Kite_WPRE_2-1C.fcs	1471	2058	1862	9066	1.56337	41.6832	82.9612
	Sample:	dead cells	live cells	dead cells	live cells
	24hrs_Jeko1_500U_IL2_don2_rep1_kite_Experiment_Kite_LTR_1-1A.fcs	2577	2425	1337	6357	1.09622	51.5194	82.6228
	24hrs_Jeko1_500U_IL2_don2_rep1_kite_Experiment_Kite_LTR_1-1B.fcs	2719	2550	1227	6226	1.07363	51.6037	83.5368
	24hrs_Jeko1_500U_IL2_don2_rep1_kite_Experiment_Kite_LTR_1-1C.fcs	3069	2244	1221	6152	1.06087	57.764	83.4396
	24hrs_Jeko1_500U_IL2_don2_rep1_kite_Experiment_Kite_LTR_1-2A.fcs	3987	2694	760	3536	0.60976	59.6767	82.3091
	24hrs_Jeko1_500U_IL2_don2_rep1_kite_Experiment_Kite_LTR_1-2B.fcs	3647	2415	702	3013	0.519572	60.1617	81.1036
	24hrs_Jeko1_500U_IL2_don2_rep1_kite_Experiment_Kite_LTR_1-2C.fcs	4076	2273	754	3699	0.637869	64.1991	83.0676
	24hrs_Jeko1_500U_IL2_don2_rep1_kite_Experiment_Kite_LTR_1-4A.fcs	3294	3493	422	2109	0.363683	48.534	83.3267
	24hrs_Jeko1_500U_IL2_don2_rep1_kite_Experiment_Kite_LTR_1-4B.fcs	3768	3662	460	2263	0.39024	50.7133	83.1069
	24hrs_Jeko1_500U_IL2_don2_rep1_kite_Experiment_Kite_LTR_1-4C.fcs	3782	3291	407	2142	0.369374	53.4709	84.033
	24hrs_Jeko1_500U_IL2_don2_rep1_kite_Experiment_Kite_LTR_2-1A.fcs	992	1644	1936	8628	1.48784	37.6328	81.6736
	24hrs_Jeko1_500U_IL2_don2_rep1_kite_Experiment_Kite_LTR_2-1B.fcs	1342	1892	2028	9324	1.60786	41.4966	82.1353
	24hrs_Jeko1_500U_IL2_don2_rep1_kite_Experiment_Kite_LTR_2-1C.fcs	1283	1849	2256	9375	1.61666	40.9642	80.6036
	Sample:	dead cells	live cells	dead cells	live cells
	24hrs_Jeko1_500U_IL2_don2_rep1_kite_Experiment_Kite_TCRA_1-1A.fcs	2411	2121	1547	7147	1.23245	53.1995	82.2061
	24hrs_Jeko1_500U_IL2_don2_rep1_kite_Experiment_Kite_TCRA_1-1B.fcs	2725	2327	1551	7006	1.20814	53.939	81.8745
	24hrs_Jeko1_500U_IL2_don2_rep1_kite_Experiment_Kite_TCRA_1-1C.fcs	3108	2090	1485	6903	1.19038	59.7922	82.2961
	24hrs_Jeko1_500U_IL2_don2_rep1_kite_Experiment_Kite_TCRA_1-2A.fcs	4009	2293	1027	4438	0.765304	63.6147	81.2077
	24hrs_Jeko1_500U_IL2_don2_rep1_kite_Experiment_Kite_TCRA_1-2B.fcs	3766	2165	919	3943	0.679945	63.4969	81.0983
	24hrs_Jeko1_500U_IL2_don2_rep1_kite_Experiment_Kite_TCRA_1-2C.fcs	4041	1912	1017	4475	0.771685	67.8817	81.4822
	24hrs_Jeko1_500U_IL2_don2_rep1_kite_Experiment_Kite_TCRA_1-4A.fcs	4167	2520	626	2952	0.509053	62.3149	82.5042
	24hrs_Jeko1_500U_IL2_don2_rep1_kite_Experiment_Kite_TCRA_1-4B.fcs	4382	2559	758	3185	0.549233	63.1321	80.7761
	24hrs_Jeko1_500U_IL2_don2_rep1_kite_Experiment_Kite_TCRA_1-4C.fcs	4352	1982	702	2870	0.494913	68.7086	80.3471
	24hrs_Jeko1_500U_IL2_don2_rep1_kite_Experiment_Kite_TCRA_2-1A.fcs	931	1677	2341	9332	1.60924	35.6979	79.9452
	24hrs_Jeko1_500U_IL2_don2_rep1_kite_Experiment_Kite_TCRA_2-1B.fcs	1141	1942	2295	9443	1.62838	37.0094	80.4481
	24hrs_Jeko1_500U_IL2_don2_rep1_kite_Experiment_Kite_TCRA_2-1C.fcs	1264	1845	2413	9340	1.61062	40.6562	79.4691
	Sample:	dead cells	live cells	dead cells	live cells
	24hrs_Jeko1_500U_IL2_don2_rep1_kite_Experiment_Kite_TCRB_1-1A.fcs	2610	2226	1602	7174	1.23711	53.9702	81.7457
	24hrs_Jeko1_500U_IL2_don2_rep1_kite_Experiment_Kite_TCRB_1-1B.fcs	2792	2131	1570	7350	1.26746	56.7134	82.3991
	24hrs_Jeko1_500U_IL2_don2_rep1_kite_Experiment_Kite_TCRB_1-1C.fcs	2993	2142	1481	7200	1.24159	58.2863	82.9398
	24hrs_Jeko1_500U_IL2_don2_rep1_kite_Experiment_Kite_TCRB_1-2A.fcs	4210	2259	1060	4551	0.78479	65.0796	81.1085
	24hrs_Jeko1_500U_IL2_don2_rep1_kite_Experiment_Kite_TCRB_1-2B.fcs	3921	2037	989	4381	0.755475	65.8107	81.5829
	24hrs_Jeko1_500U_IL2_don2_rep1_kite_Experiment_Kite_TCRB_1-2C.fcs	4186	1969	1091	4591	0.791688	68.0097	80.799
	24hrs_Jeko1_500U_IL2_don2_rep1_kite_Experiment_Kite_TCRB_1-4A.fcs	4219	2228	679	3011	0.519227	65.4413	81.5989
	24hrs_Jeko1_500U_IL2_don2_rep1_kite_Experiment_Kite_TCRB_1-4B.fcs	4550	2316	721	3278	0.56527	66.2686	81.9705
	24hrs_Jeko1_500U_IL2_don2_rep1_kite_Experiment_Kite_TCRB_1-4C.fcs	4355	1983	755	3052	0.526298	68.7125	80.1681
	24hrs_Jeko1_500U_IL2_don2_rep1_kite_Experiment_Kite_TCRB_2-1A.fcs	1026	1796	2395	9504	1.6389	36.3572	79.8723
	24hrs_Jeko1_500U_IL2_don2_rep1_kite_Experiment_Kite_TCRB_2-1B.fcs	1110	1853	2451	9740	1.6796	37.462	79.895
	24hrs_Jeko1_500U_IL2_don2_rep1_kite_Experiment_Kite_TCRB_2-1C.fcs	1171	1757	2356	9790	1.68822	39.9932	80.6027

## Sheet: J-48hrs
J		Jeko1	Jeko1	T cells	T cells	Normalized live T cells	Jeko1 dead %	CAR-T cells live %
	Sample:	dead cells	live cells	dead cells	live cells	(to 1:1 WPRE)
	48hrs_Jeko1_500U_IL2_don2_rep1_kite(1)_Experiment_Control_1-1A.fcs	2951	1556	1080	8655	1.26209	65.4759	88.906		CAR-T to B tumor ratio		Control			WPRE			LTR			TCRA			TCRB
	48hrs_Jeko1_500U_IL2_don2_rep1_kite(1)_Experiment_Control_1-1B.fcs	2805	1546	880	8276	1.20682	64.4679	90.3888		_2-1	68.4561	70.2369	69.1247	61.9247	61.0671	64.6853	59.723	57.4682	59.0446	60.4345	58.7909	56.775	61.1502	58.474	58.0934
	48hrs_Jeko1_500U_IL2_don2_rep1_kite(1)_Experiment_Control_1-1C.fcs	2918	1388	922	8796	1.28265	67.7659	90.5125		_1-1	65.4759	64.4679	67.7659	73.7681	72.2267	75.3604	74.858	70.2959	72.8893	68.3062	66.4518	69.4535	67.2777	68.0909	69.8031
	48hrs_Jeko1_500U_IL2_don2_rep1_kite(1)_Experiment_Control_1-2A.fcs	3523	2526	622	5810	0.847227	58.241	90.3296		_1-2	58.241	66.066	63.6883	81.0061	81.7271	87.4657	81.5898	82.9645	84.3205	78.3248	81.8362	83.7241	81.6451	81.9567	84.7356
	48hrs_Jeko1_500U_IL2_don2_rep1_kite(1)_Experiment_Control_1-2B.fcs	3703	1902	683	5584	0.814271	66.066	89.1016		_1-4	52.6661	54.1712	58.3633	83.2434	85.2041	88.8171	85.4437	85.6784	90.3539	87.6874	88.7737	91.2829	88.9542	89.8671	92.2259
	48hrs_Jeko1_500U_IL2_don2_rep1_kite(1)_Experiment_Control_1-2C.fcs	3792	2162	615	5884	0.858018	63.6883	90.537
	48hrs_Jeko1_500U_IL2_don2_rep1_kite(1)_Experiment_Control_1-4A.fcs	3694	3320	363	3682	0.536917	52.6661	91.026
	48hrs_Jeko1_500U_IL2_don2_rep1_kite(1)_Experiment_Control_1-4B.fcs	3974	3362	330	3605	0.525689	54.1712	91.6137		CAR-T to B tumor ratio		Cntrl T cells			WPRE T cells			LTR T cells			TCRA T cells			TCRB T cells
	48hrs_Jeko1_500U_IL2_don2_rep1_kite(1)_Experiment_Control_1-4C.fcs	3894	2778	319	3753	0.547271	58.3633	92.166		_2-1	1.65056	1.62373	1.64415	1.30321	1.28659	0.989841	1.14995	1.31196	1.31736	1.28776	1.3544	1.3544	1.36271	1.3649	1.38064
	48hrs_Jeko1_500U_IL2_don2_rep1_kite(1)_Experiment_Control_2-1A.fcs	1849	852	1383	11319	1.65056	68.4561	89.112		_1-1	1.26209	1.20682	1.28265	1.06786	0.96928	0.962864	0.977155	1.00413	0.998445	1.15827	1.06888	1.11612	1.18043	1.08929	1.09862
	48hrs_Jeko1_500U_IL2_don2_rep1_kite(1)_Experiment_Control_2-1B.fcs	2046	867	1564	11135	1.62373	70.2369	87.6841		_1-2	0.847227	0.814271	0.858018	0.661012	0.583289	0.465319	0.686531	0.628931	0.645555	0.873912	0.790648	0.78569	0.810626	0.74938	0.804209
	48hrs_Jeko1_500U_IL2_don2_rep1_kite(1)_Experiment_Control_2-1C.fcs	2006	896	1309	11275	1.64415	69.1247	89.5979		_1-4	0.536917	0.525689	0.547271	0.367472	0.337141	0.335537	0.367909	0.334224	0.339037	0.547417	0.541584	0.507899	0.544208	0.540563	0.454236
	Sample:	dead cells	live cells	dead cells	live cells
	48hrs_Jeko1_500U_IL2_don2_rep1_kite(1)_Experiment_Kite_WPRE_1-1A.fcs	2545	905	2357	7323	1.06786	73.7681	75.6508
	48hrs_Jeko1_500U_IL2_don2_rep1_kite(1)_Experiment_Kite_WPRE_1-1B.fcs	2676	1029	1848	6647	0.96928	72.2267	78.246
	48hrs_Jeko1_500U_IL2_don2_rep1_kite(1)_Experiment_Kite_WPRE_1-1C.fcs	2875	940	2019	6603	0.962864	75.3604	76.5832
	48hrs_Jeko1_500U_IL2_don2_rep1_kite(1)_Experiment_Kite_WPRE_1-2A.fcs	4525	1061	1342	4533	0.661012	81.0061	77.1574
	48hrs_Jeko1_500U_IL2_don2_rep1_kite(1)_Experiment_Kite_WPRE_1-2B.fcs	4732	1058	1255	4000	0.583289	81.7271	76.118
	48hrs_Jeko1_500U_IL2_don2_rep1_kite(1)_Experiment_Kite_WPRE_1-2C.fcs	4466	640	1284	3191	0.465319	87.4657	71.3073
	48hrs_Jeko1_500U_IL2_don2_rep1_kite(1)_Experiment_Kite_WPRE_1-4A.fcs	5708	1149	796	2520	0.367472	83.2434	75.9952
	48hrs_Jeko1_500U_IL2_don2_rep1_kite(1)_Experiment_Kite_WPRE_1-4B.fcs	6012	1044	756	2312	0.337141	85.2041	75.3585
	48hrs_Jeko1_500U_IL2_don2_rep1_kite(1)_Experiment_Kite_WPRE_1-4C.fcs	6465	814	926	2301	0.335537	88.8171	71.3046
	48hrs_Jeko1_500U_IL2_don2_rep1_kite(1)_Experiment_Kite_WPRE_2-1A.fcs	1184	728	2921	8937	1.30321	61.9247	75.3668
	48hrs_Jeko1_500U_IL2_don2_rep1_kite(1)_Experiment_Kite_WPRE_2-1B.fcs	1156	737	2742	8823	1.28659	61.0671	76.2905
	48hrs_Jeko1_500U_IL2_don2_rep1_kite(1)_Experiment_Kite_WPRE_2-1C.fcs	1110	606	2175	6788	0.989841	64.6853	75.7336
	Sample:	dead cells	live cells	dead cells	live cells
	48hrs_Jeko1_500U_IL2_don2_rep1_kite(1)_Experiment_Kite_LTR_1-1A.fcs	2373	797	2631	6701	0.977155	74.858	71.8067
	48hrs_Jeko1_500U_IL2_don2_rep1_kite(1)_Experiment_Kite_LTR_1-1B.fcs	2376	1004	1959	6886	1.00413	70.2959	77.8519
	48hrs_Jeko1_500U_IL2_don2_rep1_kite(1)_Experiment_Kite_LTR_1-1C.fcs	2495	928	2266	6847	0.998445	72.8893	75.1344
	48hrs_Jeko1_500U_IL2_don2_rep1_kite(1)_Experiment_Kite_LTR_1-2A.fcs	4352	982	1510	4708	0.686531	81.5898	75.7157
	48hrs_Jeko1_500U_IL2_don2_rep1_kite(1)_Experiment_Kite_LTR_1-2B.fcs	4724	970	1338	4313	0.628931	82.9645	76.3228
	48hrs_Jeko1_500U_IL2_don2_rep1_kite(1)_Experiment_Kite_LTR_1-2C.fcs	4641	863	1552	4427	0.645555	84.3205	74.0425
	48hrs_Jeko1_500U_IL2_don2_rep1_kite(1)_Experiment_Kite_LTR_1-4A.fcs	5999	1022	961	2523	0.367909	85.4437	72.4168
	48hrs_Jeko1_500U_IL2_don2_rep1_kite(1)_Experiment_Kite_LTR_1-4B.fcs	6144	1027	789	2292	0.334224	85.6784	74.3914
	48hrs_Jeko1_500U_IL2_don2_rep1_kite(1)_Experiment_Kite_LTR_1-4C.fcs	6229	665	906	2325	0.339037	90.3539	71.9591
	48hrs_Jeko1_500U_IL2_don2_rep1_kite(1)_Experiment_Kite_LTR_2-1A.fcs	1078	727	2696	7886	1.14995	59.723	74.5228
	48hrs_Jeko1_500U_IL2_don2_rep1_kite(1)_Experiment_Kite_LTR_2-1B.fcs	1085	803	3023	8997	1.31196	57.4682	74.8502
	48hrs_Jeko1_500U_IL2_don2_rep1_kite(1)_Experiment_Kite_LTR_2-1C.fcs	1100	763	2960	9034	1.31736	59.0446	75.321
	Sample:	dead cells	live cells	dead cells	live cells
	48hrs_Jeko1_500U_IL2_don2_rep1_kite(1)_Experiment_Kite_TCRA_1-1A.fcs	1847	857	2707	7943	1.15827	68.3062	74.5822
	48hrs_Jeko1_500U_IL2_don2_rep1_kite(1)_Experiment_Kite_TCRA_1-1B.fcs	1959	989	2342	7330	1.06888	66.4518	75.7858
	48hrs_Jeko1_500U_IL2_don2_rep1_kite(1)_Experiment_Kite_TCRA_1-1C.fcs	2135	939	2289	7654	1.11612	69.4535	76.9788
	48hrs_Jeko1_500U_IL2_don2_rep1_kite(1)_Experiment_Kite_TCRA_1-2A.fcs	3516	973	1892	5993	0.873912	78.3248	76.0051
	48hrs_Jeko1_500U_IL2_don2_rep1_kite(1)_Experiment_Kite_TCRA_1-2B.fcs	3717	825	1713	5422	0.790648	81.8362	75.9916
	48hrs_Jeko1_500U_IL2_don2_rep1_kite(1)_Experiment_Kite_TCRA_1-2C.fcs	3678	715	1956	5388	0.78569	83.7241	73.366
	48hrs_Jeko1_500U_IL2_don2_rep1_kite(1)_Experiment_Kite_TCRA_1-4A.fcs	5206	731	1354	3754	0.547417	87.6874	73.4926
	48hrs_Jeko1_500U_IL2_don2_rep1_kite(1)_Experiment_Kite_TCRA_1-4B.fcs	5393	682	1339	3714	0.541584	88.7737	73.5009
	48hrs_Jeko1_500U_IL2_don2_rep1_kite(1)_Experiment_Kite_TCRA_1-4C.fcs	5372	513	1498	3483	0.507899	91.2829	69.9257
	48hrs_Jeko1_500U_IL2_don2_rep1_kite(1)_Experiment_Kite_TCRA_2-1A.fcs	918	601	3109	8831	1.28776	60.4345	73.9615
	48hrs_Jeko1_500U_IL2_don2_rep1_kite(1)_Experiment_Kite_TCRA_2-1B.fcs	953	668	3099	9288	1.3544	58.7909	74.9818
	48hrs_Jeko1_500U_IL2_don2_rep1_kite(1)_Experiment_Kite_TCRA_2-1C.fcs	926	705	3120	9288	1.3544	56.775	74.8549
	Sample:	dead cells	live cells	dead cells	live cells
	48hrs_Jeko1_500U_IL2_don2_rep1_kite(1)_Experiment_Kite_TCRB_1-1A.fcs	1725	839	2801	8095	1.18043	67.2777	74.2933
	48hrs_Jeko1_500U_IL2_don2_rep1_kite(1)_Experiment_Kite_TCRB_1-1B.fcs	2008	941	2299	7470	1.08929	68.0909	76.4664
	48hrs_Jeko1_500U_IL2_don2_rep1_kite(1)_Experiment_Kite_TCRB_1-1C.fcs	2092	905	2714	7534	1.09862	69.8031	73.5168
	48hrs_Jeko1_500U_IL2_don2_rep1_kite(1)_Experiment_Kite_TCRB_1-2A.fcs	3603	810	1874	5559	0.810626	81.6451	74.7881
	48hrs_Jeko1_500U_IL2_don2_rep1_kite(1)_Experiment_Kite_TCRB_1-2B.fcs	3711	817	1809	5139	0.74938	81.9567	73.9637
	48hrs_Jeko1_500U_IL2_don2_rep1_kite(1)_Experiment_Kite_TCRB_1-2C.fcs	3958	713	1887	5515	0.804209	84.7356	74.5069
	48hrs_Jeko1_500U_IL2_don2_rep1_kite(1)_Experiment_Kite_TCRB_1-4A.fcs	5452	677	1394	3732	0.544208	88.9542	72.8053
	48hrs_Jeko1_500U_IL2_don2_rep1_kite(1)_Experiment_Kite_TCRB_1-4B.fcs	5614	633	1424	3707	0.540563	89.8671	72.2471
	48hrs_Jeko1_500U_IL2_don2_rep1_kite(1)_Experiment_Kite_TCRB_1-4C.fcs	5635	475	1346	3115	0.454236	92.2259	69.8274
	48hrs_Jeko1_500U_IL2_don2_rep1_kite(1)_Experiment_Kite_TCRB_2-1A.fcs	957	608	3247	9345	1.36271	61.1502	74.2138
	48hrs_Jeko1_500U_IL2_don2_rep1_kite(1)_Experiment_Kite_TCRB_2-1B.fcs	935	664	3185	9360	1.3649	58.474	74.6114
	48hrs_Jeko1_500U_IL2_don2_rep1_kite(1)_Experiment_Kite_TCRB_2-1C.fcs	908	655	3001	9468	1.38064	58.0934	75.9323

## Sheet: J-72hrs
		Jeko1	Jeko1	T cells	T cells	Normalized live T cells	Jeko1 dead %	CAR-T cells live %
	Sample:	dead cells	live cells	dead cells	live cells	(to 1:1 WPRE)
	72hrs_Jeko1_500U_IL2_don2_rep1_kite_Experiment_Control_1-1A.fcs	3552	435	1171	8708	1.05097	89.0895	88.1466		CAR-T to B tumor ratio		Control			WPRE			LTR			TCRA			TCRB
	72hrs_Jeko1_500U_IL2_don2_rep1_kite_Experiment_Control_1-1B.fcs	3747	472	1225	8713	1.05158	88.8125	87.6736		_2-1	#DIV/0!	87.0152	88.7945	74.7162	69.2142	68.6069	76.4392	72.7829	72.293	73.758	74.7452	71.445	76.9404	78.4598	74.0834
	72hrs_Jeko1_500U_IL2_don2_rep1_kite_Experiment_Control_1-1C.fcs	3841	366	1571	9058	1.09321	91.3002	85.2197		_1-1	89.0895	88.8125	91.3002	74.5477	76.78	75.8131	76.9034	73.41	75.4183	72.9013	72.0438	71.4708	67.8317	73.7693	75.1538
	72hrs_Jeko1_500U_IL2_don2_rep1_kite_Experiment_Control_1-2A.fcs	5222	854	787	6472	0.781108	85.9447	89.1583		_1-2	85.9447	85.5615	85.6021	85.6672	#DIV/0!	86.1709	84.7237	83.0809	84.7475	78.8049	80.724	78.4015	81.0171	79.8759	79.5726
	72hrs_Jeko1_500U_IL2_don2_rep1_kite_Experiment_Control_1-2B.fcs	4960	837	836	6483	0.782436	85.5615	88.5777		_1-4	78.9023	76.5442	83.9784	90.5113	90.2958	92.4546	89.9862	90.5309	92.8554	89.2857	86.2302	90.0863	87.9035	88.6438	91.8373
	72hrs_Jeko1_500U_IL2_don2_rep1_kite_Experiment_Control_1-2C.fcs	4905	825	770	6433	0.776401	85.6021	89.31
	72hrs_Jeko1_500U_IL2_don2_rep1_kite_Experiment_Control_1-4A.fcs	5894	1576	516	4292	0.518003	78.9023	89.2679
	72hrs_Jeko1_500U_IL2_don2_rep1_kite_Experiment_Control_1-4B.fcs	5502	1686	401	4049	0.488675	76.5442	90.9888		CAR-T to B tumor ratio		Cntrl T cells			WPRE T cells			LTR T cells			TCRA T cells			TCRB T cells
	72hrs_Jeko1_500U_IL2_don2_rep1_kite_Experiment_Control_1-4C.fcs	5446	1039	693	3827	0.461882	83.9784	84.6681		_2-1	0	1.40049	1.34473	1.29187	1.29609	1.27039	1.18856	1.29935	1.25385	1.27751	1.30792	1.26604	1.29996	1.33351	1.26665
	72hrs_Jeko1_500U_IL2_don2_rep1_kite_Experiment_Control_2-1A.fcs	0	0	0	0	0	#DIV/0!	#DIV/0!		_1-1	1.05097	1.05158	1.09321	0.985799	0.955143	1.05906	1.0727	0.98604	1.10359	1.14559	1.10963	1.12604	1.1258	1.08959	1.11542
	72hrs_Jeko1_500U_IL2_don2_rep1_kite_Experiment_Control_2-1B.fcs	2064	308	1880	11604	1.40049	87.0152	86.0575		_1-2	0.781108	0.782436	0.776401	0.85666	0	0.834574	0.899747	0.873677	0.848453	0.99823	0.950316	0.947902	0.949471	0.949109	0.932454
	72hrs_Jeko1_500U_IL2_don2_rep1_kite_Experiment_Control_2-1C.fcs	2195	277	1831	11142	1.34473	88.7945	85.8861		_1-4	0.518003	0.488675	0.461882	0.737177	0.666452	0.643038	0.730659	0.684073	0.628435	0.855453	0.836505	0.708935	0.84435	0.756487	0.705556
	Sample:	dead cells	live cells	dead cells	live cells
	72hrs_Jeko1_500U_IL2_don2_rep1_kite_Experiment_Kite_WPRE_1-1A.fcs	1195	408	2768	8168	0.985799	74.5477	74.6891
	72hrs_Jeko1_500U_IL2_don2_rep1_kite_Experiment_Kite_WPRE_1-1B.fcs	1197	362	2764	7914	0.955143	76.78	74.115
	72hrs_Jeko1_500U_IL2_don2_rep1_kite_Experiment_Kite_WPRE_1-1C.fcs	1282	409	3167	8775	1.05906	75.8131	73.4802
	72hrs_Jeko1_500U_IL2_don2_rep1_kite_Experiment_Kite_WPRE_1-2A.fcs	2600	435	2694	7098	0.85666	85.6672	72.4877
	72hrs_Jeko1_500U_IL2_don2_rep1_kite_Experiment_Kite_WPRE_1-2B.fcs	0	0	0	0	0	#DIV/0!	#DIV/0!
	72hrs_Jeko1_500U_IL2_don2_rep1_kite_Experiment_Kite_WPRE_1-2C.fcs	2642	424	2430	6915	0.834574	86.1709	73.9968
	72hrs_Jeko1_500U_IL2_don2_rep1_kite_Experiment_Kite_WPRE_1-4A.fcs	4178	438	1948	6108	0.737177	90.5113	75.8193
	72hrs_Jeko1_500U_IL2_don2_rep1_kite_Experiment_Kite_WPRE_1-4B.fcs	4029	433	1873	5522	0.666452	90.2958	74.6721
	72hrs_Jeko1_500U_IL2_don2_rep1_kite_Experiment_Kite_WPRE_1-4C.fcs	3970	324	2061	5328	0.643038	92.4546	72.1072
	72hrs_Jeko1_500U_IL2_don2_rep1_kite_Experiment_Kite_WPRE_2-1A.fcs	724	245	3150	10704	1.29187	74.7162	77.2629
	72hrs_Jeko1_500U_IL2_don2_rep1_kite_Experiment_Kite_WPRE_2-1B.fcs	643	286	3017	10739	1.29609	69.2142	78.0678
	72hrs_Jeko1_500U_IL2_don2_rep1_kite_Experiment_Kite_WPRE_2-1C.fcs	719	329	3014	10526	1.27039	68.6069	77.74
	Sample:	dead cells	live cells	dead cells	live cells
	72hrs_Jeko1_500U_IL2_don2_rep1_kite_Experiment_Kite_LTR_1-1A.fcs	1202	361	3132	8888	1.0727	76.9034	73.9434
	72hrs_Jeko1_500U_IL2_don2_rep1_kite_Experiment_Kite_LTR_1-1B.fcs	1085	393	2645	8170	0.98604	73.41	75.5432
	72hrs_Jeko1_500U_IL2_don2_rep1_kite_Experiment_Kite_LTR_1-1C.fcs	1172	382	3327	9144	1.10359	75.4183	73.3221
	72hrs_Jeko1_500U_IL2_don2_rep1_kite_Experiment_Kite_LTR_1-2A.fcs	2407	434	2544	7455	0.899747	84.7237	74.5575
	72hrs_Jeko1_500U_IL2_don2_rep1_kite_Experiment_Kite_LTR_1-2B.fcs	2249	458	2746	7239	0.873677	83.0809	72.4987
	72hrs_Jeko1_500U_IL2_don2_rep1_kite_Experiment_Kite_LTR_1-2C.fcs	2467	444	2589	7030	0.848453	84.7475	73.0845
	72hrs_Jeko1_500U_IL2_don2_rep1_kite_Experiment_Kite_LTR_1-4A.fcs	3900	434	2211	6054	0.730659	89.9862	73.2486
	72hrs_Jeko1_500U_IL2_don2_rep1_kite_Experiment_Kite_LTR_1-4B.fcs	3939	412	1998	5668	0.684073	90.5309	73.9369
	72hrs_Jeko1_500U_IL2_don2_rep1_kite_Experiment_Kite_LTR_1-4C.fcs	3860	297	2114	5207	0.628435	92.8554	71.1242
	72hrs_Jeko1_500U_IL2_don2_rep1_kite_Experiment_Kite_LTR_2-1A.fcs	717	221	3100	9848	1.18856	76.4392	76.0581
	72hrs_Jeko1_500U_IL2_don2_rep1_kite_Experiment_Kite_LTR_2-1B.fcs	714	267	3191	10766	1.29935	72.7829	77.1369
	72hrs_Jeko1_500U_IL2_don2_rep1_kite_Experiment_Kite_LTR_2-1C.fcs	681	261	3120	10389	1.25385	72.293	76.9043
	Sample:	dead cells	live cells	dead cells	live cells
	72hrs_Jeko1_500U_IL2_don2_rep1_kite_Experiment_Kite_TCRA_1-1A.fcs	990	368	3228	9492	1.14559	72.9013	74.6226
	72hrs_Jeko1_500U_IL2_don2_rep1_kite_Experiment_Kite_TCRA_1-1B.fcs	987	383	3354	9194	1.10963	72.0438	73.2706
	72hrs_Jeko1_500U_IL2_don2_rep1_kite_Experiment_Kite_TCRA_1-1C.fcs	967	386	3286	9330	1.12604	71.4708	73.9537
	72hrs_Jeko1_500U_IL2_don2_rep1_kite_Experiment_Kite_TCRA_1-2A.fcs	1688	454	2958	8271	0.99823	78.8049	73.6575
	72hrs_Jeko1_500U_IL2_don2_rep1_kite_Experiment_Kite_TCRA_1-2B.fcs	1784	426	2960	7874	0.950316	80.724	72.6786
	72hrs_Jeko1_500U_IL2_don2_rep1_kite_Experiment_Kite_TCRA_1-2C.fcs	1648	454	3149	7854	0.947902	78.4015	71.3805
	72hrs_Jeko1_500U_IL2_don2_rep1_kite_Experiment_Kite_TCRA_1-4A.fcs	2725	327	2969	7088	0.855453	89.2857	70.4783
	72hrs_Jeko1_500U_IL2_don2_rep1_kite_Experiment_Kite_TCRA_1-4B.fcs	2674	427	2478	6931	0.836505	86.2302	73.6635
	72hrs_Jeko1_500U_IL2_don2_rep1_kite_Experiment_Kite_TCRA_1-4C.fcs	2817	310	2712	5874	0.708935	90.0863	68.4137
	72hrs_Jeko1_500U_IL2_don2_rep1_kite_Experiment_Kite_TCRA_2-1A.fcs	579	206	3219	10585	1.27751	73.758	76.6807
	72hrs_Jeko1_500U_IL2_don2_rep1_kite_Experiment_Kite_TCRA_2-1B.fcs	660	223	3136	10837	1.30792	74.7452	77.5567
	72hrs_Jeko1_500U_IL2_don2_rep1_kite_Experiment_Kite_TCRA_2-1C.fcs	623	249	3156	10490	1.26604	71.445	76.8723
	Sample:	dead cells	live cells	dead cells	live cells
	72hrs_Jeko1_500U_IL2_don2_rep1_kite_Experiment_Kite_TCRB_1-1A.fcs	951	451	3209	9328	1.1258	67.8317	74.4038
	72hrs_Jeko1_500U_IL2_don2_rep1_kite_Experiment_Kite_TCRB_1-1B.fcs	1049	373	3415	9028	1.08959	73.7693	72.5549
	72hrs_Jeko1_500U_IL2_don2_rep1_kite_Experiment_Kite_TCRB_1-1C.fcs	977	323	3503	9242	1.11542	75.1538	72.5147
	72hrs_Jeko1_500U_IL2_don2_rep1_kite_Experiment_Kite_TCRB_1-2A.fcs	1848	433	2973	7867	0.949471	81.0171	72.5738
	72hrs_Jeko1_500U_IL2_don2_rep1_kite_Experiment_Kite_TCRB_1-2B.fcs	1802	454	3070	7864	0.949109	79.8759	71.9224
	72hrs_Jeko1_500U_IL2_don2_rep1_kite_Experiment_Kite_TCRB_1-2C.fcs	1862	478	3062	7726	0.932454	79.5726	71.6166
	72hrs_Jeko1_500U_IL2_don2_rep1_kite_Experiment_Kite_TCRB_1-4A.fcs	2914	401	2759	6996	0.84435	87.9035	71.7171
	72hrs_Jeko1_500U_IL2_don2_rep1_kite_Experiment_Kite_TCRB_1-4B.fcs	2974	381	2526	6268	0.756487	88.6438	71.2759
	72hrs_Jeko1_500U_IL2_don2_rep1_kite_Experiment_Kite_TCRB_1-4C.fcs	3049	271	2622	5846	0.705556	91.8373	69.0364
	72hrs_Jeko1_500U_IL2_don2_rep1_kite_Experiment_Kite_TCRB_2-1A.fcs	684	205	3477	10771	1.29996	76.9404	75.5966
	72hrs_Jeko1_500U_IL2_don2_rep1_kite_Experiment_Kite_TCRB_2-1B.fcs	703	193	3030	11049	1.33351	78.4598	78.4786
	72hrs_Jeko1_500U_IL2_don2_rep1_kite_Experiment_Kite_TCRB_2-1C.fcs	586	205	2680	10495	1.26665	74.0834	79.6584
