# Supplementary material for: Robust T cell activation requires an eIF3-driven burst in T cell receptor translation
Source: eLife journal article supplement (doi:10.7554/elife.74272), 2021-12-31
Supplement: supp [file DeSilva_Figure6F-G_and_Figure6-figure-supplement-1C-D.xlsx]

## Sheet: N-24hrs
		NALM6	NALM6	T cells	T cells	Normalized live T cells	NALM6 dead %	CAR-T cells live %
	Sample:	dead cells	live cells	dead cells	live cells	(to 1:1 WPRE)
	24hrs_NALM6_50U_IL2_don2_day10_Experiment_Control_1-1A.fcs	2299	3974	1384	10221	1.3164	36.6491	88.0741		CAR-T to B tumor ratio	Control			WPRE			LTR			TCRA			TCRB
	24hrs_NALM6_50U_IL2_don2_day10_Experiment_Control_1-1B.fcs	2291	4107	1299	10144	1.30649	35.8081	88.6481		_2-1	42.169	42.9933	41.7481	89.4792	89.3362	88.3633	83.4291	84.2047	84.1728	95.1673	95.4207	94.3375	94.2928	94.7622	93.4328
	24hrs_NALM6_50U_IL2_don2_day10_Experiment_Control_1-1C.fcs	2329	3912	1346	10238	1.31859	37.3177	88.3805		_1-1	36.6491	35.8081	37.3177	78.2843	79.5586	78.9196	73.614	72.9088	72.3776	90.3149	91.1723	91.3211	90.0127	89.7376	88.7206
	24hrs_NALM6_50U_IL2_don2_day10_Experiment_Control_1-2A.fcs	3183	6042	977	7335	0.944704	34.5041	88.2459		_1-2	34.5041	35.3083	37.1719	68.1999	69.2969	69.4585	62.7285	61.9042	63.0344	83.3827	84.8832	83.2363	80.6121	80.2557	81.739
	24hrs_NALM6_50U_IL2_don2_day10_Experiment_Control_1-2B.fcs	3212	5885	1066	7091	0.913279	35.3083	86.9315		_1-4	35.1243	36.2169	34.3101	60.7151	59.8308	60.3861	52.3142	56.8392	55.2829	74.0291	70.3221	72.2368	70.1703	70.6743	68.9309
	24hrs_NALM6_50U_IL2_don2_day10_Experiment_Control_1-2C.fcs	3328	5625	1027	7597	0.978448	37.1719	88.0914
	24hrs_NALM6_50U_IL2_don2_day10_Experiment_Control_1-4A.fcs	3334	6158	543	3720	0.479114	35.1243	87.2625
	24hrs_NALM6_50U_IL2_don2_day10_Experiment_Control_1-4B.fcs	3500	6164	538	3833	0.493668	36.2169	87.6916		CAR-T to B tumor ratio		Cntrl T cells			WPRE T cells			LTR T cells			TCRA T cells			TCRB T cells
	24hrs_NALM6_50U_IL2_don2_day10_Experiment_Control_1-4C.fcs	3255	6232	591	3822	0.492251	34.3101	86.6077		_2-1	1.56936	1.58417	1.57361	1.2126	1.20847	1.20525	1.18465	1.18259	1.16971	1.35015	1.31924	1.32851	1.38351	1.35169	1.40115
	24hrs_NALM6_50U_IL2_don2_day10_Experiment_Control_2-1A.fcs	1567	2149	1803	12185	1.56936	42.169	87.1104		_1-1	1.3164	1.30649	1.31859	1.01052	1.00794	0.98154	0.896278	0.926287	0.918173	1.23179	1.22032	1.24827	1.30134	1.35646	1.34294
	24hrs_NALM6_50U_IL2_don2_day10_Experiment_Control_2-1B.fcs	1669	2213	1712	12300	1.58417	42.9933	87.7819		_1-2	0.944704	0.913279	0.978448	0.596574	0.574164	0.566565	0.478728	0.481819	0.506161	1.02546	1.01631	1.02675	1.21079	1.16984	1.15618
	24hrs_NALM6_50U_IL2_don2_day10_Experiment_Control_2-1C.fcs	1538	2146	1830	12218	1.57361	41.7481	86.9732		_1-4	0.479114	0.493668	0.492251	0.291075	0.260035	0.273301	0.245997	0.259391	0.257073	0.677457	0.56605	0.628386	0.786417	0.693942	0.754733
	Sample:	dead cells	live cells	dead cells	live cells
	24hrs_NALM6_50U_IL2_don2_day10_Experiment_Juno_WPRE_1-1A.fcs	5238	1453	1856	7846	1.01052	78.2843	80.8699
	24hrs_NALM6_50U_IL2_don2_day10_Experiment_Juno_WPRE_1-1B.fcs	5515	1417	1754	7826	1.00794	79.5586	81.691
	24hrs_NALM6_50U_IL2_don2_day10_Experiment_Juno_WPRE_1-1C.fcs	5230	1397	1964	7621	0.98154	78.9196	79.5097
	24hrs_NALM6_50U_IL2_don2_day10_Experiment_Juno_WPRE_1-2A.fcs	5990	2793	1121	4632	0.596574	68.1999	80.5145
	24hrs_NALM6_50U_IL2_don2_day10_Experiment_Juno_WPRE_1-2B.fcs	6130	2716	1154	4458	0.574164	69.2969	79.4369
	24hrs_NALM6_50U_IL2_don2_day10_Experiment_Juno_WPRE_1-2C.fcs	5913	2600	1097	4399	0.566565	69.4585	80.04
	24hrs_NALM6_50U_IL2_don2_day10_Experiment_Juno_WPRE_1-4A.fcs	5417	3505	680	2260	0.291075	60.7151	76.8707
	24hrs_NALM6_50U_IL2_don2_day10_Experiment_Juno_WPRE_1-4B.fcs	5374	3608	579	2019	0.260035	59.8308	77.7136
	24hrs_NALM6_50U_IL2_don2_day10_Experiment_Juno_WPRE_1-4C.fcs	5474	3591	740	2122	0.273301	60.3861	74.144
	24hrs_NALM6_50U_IL2_don2_day10_Experiment_Juno_WPRE_2-1A.fcs	3402	400	2527	9415	1.2126	89.4792	78.8394
	24hrs_NALM6_50U_IL2_don2_day10_Experiment_Juno_WPRE_2-1B.fcs	3284	392	2621	9383	1.20847	89.3362	78.1656
	24hrs_NALM6_50U_IL2_don2_day10_Experiment_Juno_WPRE_2-1C.fcs	3288	433	2546	9358	1.20525	88.3633	78.6122
	Sample:	dead cells	live cells	dead cells	live cells
	24hrs_NALM6_50U_IL2_don2_day10_Experiment_Juno-LTR_1-1A.fcs	5683	2037	1929	6959	0.896278	73.614	78.2966
	24hrs_NALM6_50U_IL2_don2_day10_Experiment_Juno-LTR_1-1B.fcs	5622	2089	1800	7192	0.926287	72.9088	79.9822
	24hrs_NALM6_50U_IL2_don2_day10_Experiment_Juno-LTR_1-1C.fcs	5513	2104	1903	7129	0.918173	72.3776	78.9305
	24hrs_NALM6_50U_IL2_don2_day10_Experiment_Juno-LTR_1-2A.fcs	5421	3221	1019	3717	0.478728	62.7285	78.484
	24hrs_NALM6_50U_IL2_don2_day10_Experiment_Juno-LTR_1-2B.fcs	5234	3221	940	3741	0.481819	61.9042	79.9188
	24hrs_NALM6_50U_IL2_don2_day10_Experiment_Juno-LTR_1-2C.fcs	5293	3104	1012	3930	0.506161	63.0344	79.5225
	24hrs_NALM6_50U_IL2_don2_day10_Experiment_Juno-LTR_1-4A.fcs	4702	4286	524	1910	0.245997	52.3142	78.4717
	24hrs_NALM6_50U_IL2_don2_day10_Experiment_Juno-LTR_1-4B.fcs	4920	3736	522	2014	0.259391	56.8392	79.4164
	24hrs_NALM6_50U_IL2_don2_day10_Experiment_Juno-LTR_1-4C.fcs	4866	3936	583	1996	0.257073	55.2829	77.3943
	24hrs_NALM6_50U_IL2_don2_day10_Experiment_Juno-LTR_2-1A.fcs	3922	779	2543	9198	1.18465	83.4291	78.3409
	24hrs_NALM6_50U_IL2_don2_day10_Experiment_Juno-LTR_2-1B.fcs	3785	710	2542	9182	1.18259	84.2047	78.318
	24hrs_NALM6_50U_IL2_don2_day10_Experiment_Juno-LTR_2-1C.fcs	3760	707	2457	9082	1.16971	84.1728	78.707
	Sample:	dead cells	live cells	dead cells	live cells
	24hrs_NALM6_50U_IL2_don2_day10_Experiment_Juno-TCRA_1-1A.fcs	3040	326	2813	9564	1.23179	90.3149	77.2724
	24hrs_NALM6_50U_IL2_don2_day10_Experiment_Juno-TCRA_1-1B.fcs	3212	311	2654	9475	1.22032	91.1723	78.1186
	24hrs_NALM6_50U_IL2_don2_day10_Experiment_Juno-TCRA_1-1C.fcs	3083	293	2746	9692	1.24827	91.3211	77.9225
	24hrs_NALM6_50U_IL2_don2_day10_Experiment_Juno-TCRA_1-2A.fcs	5063	1009	2382	7962	1.02546	83.3827	76.9722
	24hrs_NALM6_50U_IL2_don2_day10_Experiment_Juno-TCRA_1-2B.fcs	5267	938	2230	7891	1.01631	84.8832	77.9666
	24hrs_NALM6_50U_IL2_don2_day10_Experiment_Juno-TCRA_1-2C.fcs	4861	979	2418	7972	1.02675	83.2363	76.7276
	24hrs_NALM6_50U_IL2_don2_day10_Experiment_Juno-TCRA_1-4A.fcs	5490	1926	1530	5260	0.677457	74.0291	77.4669
	24hrs_NALM6_50U_IL2_don2_day10_Experiment_Juno-TCRA_1-4B.fcs	6047	2552	1361	4395	0.56605	70.3221	76.3551
	24hrs_NALM6_50U_IL2_don2_day10_Experiment_Juno-TCRA_1-4C.fcs	6039	2321	1430	4879	0.628386	72.2368	77.334
	24hrs_NALM6_50U_IL2_don2_day10_Experiment_Juno-TCRA_2-1A.fcs	1536	78	3096	10483	1.35015	95.1673	77.2001
	24hrs_NALM6_50U_IL2_don2_day10_Experiment_Juno-TCRA_2-1B.fcs	1667	80	3208	10243	1.31924	95.4207	76.1505
	24hrs_NALM6_50U_IL2_don2_day10_Experiment_Juno-TCRA_2-1C.fcs	1716	103	2834	10315	1.32851	94.3375	78.447
	Sample:	dead cells	live cells	dead cells	live cells
	24hrs_NALM6_50U_IL2_don2_day10_Experiment_Juno_TCRB_1-1A.fcs	2830	314	2549	10104	1.30134	90.0127	79.8546
	24hrs_NALM6_50U_IL2_don2_day10_Experiment_Juno_TCRB_1-1B.fcs	2702	309	2538	10532	1.35646	89.7376	80.5815
	24hrs_NALM6_50U_IL2_don2_day10_Experiment_Juno_TCRB_1-1C.fcs	2753	350	2547	10427	1.34294	88.7206	80.3684
	24hrs_NALM6_50U_IL2_don2_day10_Experiment_Juno_TCRB_1-2A.fcs	4241	1020	2203	9401	1.21079	80.6121	81.0152
	24hrs_NALM6_50U_IL2_don2_day10_Experiment_Juno_TCRB_1-2B.fcs	4394	1081	2093	9083	1.16984	80.2557	81.2724
	24hrs_NALM6_50U_IL2_don2_day10_Experiment_Juno_TCRB_1-2C.fcs	4315	964	2213	8977	1.15618	81.739	80.2234
	24hrs_NALM6_50U_IL2_don2_day10_Experiment_Juno_TCRB_1-4A.fcs	5521	2347	1574	6106	0.786417	70.1703	79.5052
	24hrs_NALM6_50U_IL2_don2_day10_Experiment_Juno_TCRB_1-4B.fcs	5796	2405	1469	5388	0.693942	70.6743	78.5766
	24hrs_NALM6_50U_IL2_don2_day10_Experiment_Juno_TCRB_1-4C.fcs	5429	2447	1473	5860	0.754733	68.9309	79.9127
	24hrs_NALM6_50U_IL2_don2_day10_Experiment_Juno_TCRB_2-1A.fcs	1520	92	3174	10742	1.38351	94.2928	77.1917
	24hrs_NALM6_50U_IL2_don2_day10_Experiment_Juno_TCRB_2-1B.fcs	1574	87	3192	10495	1.35169	94.7622	76.6786
	24hrs_NALM6_50U_IL2_don2_day10_Experiment_Juno_TCRB_2-1C.fcs	1565	110	2810	10879	1.40115	93.4328	79.4726

## Sheet: N-48hrs
		NALM6	NALM6	T cells	T cells	Normalized live T cells	NALM6 dead %	CAR-T cells live %
	Sample:	dead cells	live cells	dead cells	live cells	(to 1:1 WPRE)
	48hrs_NALM6_50U_IL2_don2_day10_Experiment_Control_1-1A.fcs	2926	2150	1574	10380	1.34288	57.6438	86.8329		CAR-T to B tumor ratio	Control			WPRE			LTR			TCRA			TCRB
	48hrs_NALM6_50U_IL2_don2_day10_Experiment_Control_1-1B.fcs	2770	2148	1499	10644	1.37703	56.3237	87.6554		_2-1	71.0735	72.1469	69.6156	95.6916	94.8694	#DIV/0!	94.8837	94.7699	92.3705	96.2202	95.2527	94.288	96.2521	95.6998	96.1049
	48hrs_NALM6_50U_IL2_don2_day10_Experiment_Control_1-1C.fcs	3037	1938	1645	10558	1.36591	61.0452	86.5197		_1-1	57.6438	56.3237	61.0452	90.6556	89.8784	90.1936	86.9184	87.8788	88.0235	94.3655	94.1686	94.5406	95.872	95.6423	95.1872
	48hrs_NALM6_50U_IL2_don2_day10_Experiment_Control_1-2A.fcs	4104	3625	1101	7931	1.02605	53.0987	87.81		_1-2	53.0987	53.934	52.6467	84.2046	85.2933	85.3486	81.9899	82.5553	80.998	92.6537	93.8367	93.845	92.789	93.6431	92.7705
	48hrs_NALM6_50U_IL2_don2_day10_Experiment_Control_1-2B.fcs	4154	3548	1133	7938	1.02695	53.934	87.5096		_1-4	51.0786	50.4163	58.7598	80.3929	82.6005	83.1485	74.9104	79.022	79.6925	88.9255	89.0755	89.6951	86.5933	90.678	88.8086
	48hrs_NALM6_50U_IL2_don2_day10_Experiment_Control_1-2C.fcs	3849	3462	1198	8017	1.03717	52.6467	86.9995
	48hrs_NALM6_50U_IL2_don2_day10_Experiment_Control_1-4A.fcs	4570	4377	657	4999	0.646729	51.0786	88.384
	48hrs_NALM6_50U_IL2_don2_day10_Experiment_Control_1-4B.fcs	4360	4288	660	4712	0.609599	50.4163	87.7141		CAR-T to B tumor ratio		Cntrl T cells			WPRE T cells			LTR T cells			TCRA T cells			TCRB T cells
	48hrs_NALM6_50U_IL2_don2_day10_Experiment_Control_1-4C.fcs	4719	3312	789	4485	0.580232	58.7598	85.0398		_2-1	1.63099	1.58752	1.59852	1.08362	1.10367	0	1.04144	1.06279	1.0721	1.26888	1.23679	1.28854	1.16059	1.2571	1.28699
	48hrs_NALM6_50U_IL2_don2_day10_Experiment_Control_2-1A.fcs	2059	838	1947	12607	1.63099	71.0735	86.6222		_1-1	1.34288	1.37703	1.36591	0.985683	1.01854	0.995774	0.932123	0.927854	0.925266	1.14222	1.18388	1.14209	1.19242	1.15658	1.18789
	48hrs_NALM6_50U_IL2_don2_day10_Experiment_Control_2-1B.fcs	2181	842	2126	12271	1.58752	72.1469	85.233		_1-2	1.02605	1.02695	1.03717	0.793307	0.741429	0.755531	0.596274	0.550347	0.591358	0.977532	0.937427	0.981284	1.00599	1.01945	1.04791
	48hrs_NALM6_50U_IL2_don2_day10_Experiment_Control_2-1C.fcs	2101	917	1968	12356	1.59852	69.6156	86.2608		_1-4	0.646729	0.609599	0.580232	0.351503	0.289016	0.301307	0.277502	0.269999	0.239338	0.735349	0.676485	0.687093	0.795377	0.747898	0.753719
	Sample:	dead cells	live cells	dead cells	live cells
	48hrs_NALM6_50U_IL2_don2_day10_Experiment_Juno_WPRE_1-1A.fcs	3706	382	2660	7619	0.985683	90.6556	74.122
	48hrs_NALM6_50U_IL2_don2_day10_Experiment_Juno_WPRE_1-1B.fcs	3623	408	2704	7873	1.01854	89.8784	74.4351
	48hrs_NALM6_50U_IL2_don2_day10_Experiment_Juno_WPRE_1-1C.fcs	3633	395	2600	7697	0.995774	90.1936	74.7499
	48hrs_NALM6_50U_IL2_don2_day10_Experiment_Juno_WPRE_1-2A.fcs	6024	1130	1806	6132	0.793307	84.2046	77.2487
	48hrs_NALM6_50U_IL2_don2_day10_Experiment_Juno_WPRE_1-2B.fcs	6020	1038	2006	5731	0.741429	85.2933	74.0726
	48hrs_NALM6_50U_IL2_don2_day10_Experiment_Juno_WPRE_1-2C.fcs	6169	1059	1909	5840	0.755531	85.3486	75.3646
	48hrs_NALM6_50U_IL2_don2_day10_Experiment_Juno_WPRE_1-4A.fcs	6753	1647	1040	2717	0.351503	80.3929	72.3183
	48hrs_NALM6_50U_IL2_don2_day10_Experiment_Juno_WPRE_1-4B.fcs	6124	1290	1067	2234	0.289016	82.6005	67.6765
	48hrs_NALM6_50U_IL2_don2_day10_Experiment_Juno_WPRE_1-4C.fcs	6523	1322	1149	2329	0.301307	83.1485	66.9638
	48hrs_NALM6_50U_IL2_don2_day10_Experiment_Juno_WPRE_2-1A.fcs	2110	95	3402	8376	1.08362	95.6916	71.1156
	48hrs_NALM6_50U_IL2_don2_day10_Experiment_Juno_WPRE_2-1B.fcs	2071	112	3292	8531	1.10367	94.8694	72.156
	48hrs_NALM6_50U_IL2_don2_day10_Experiment_Juno_WPRE_2-1C.fcs	0	0	0	0	0	#DIV/0!	#DIV/0!
	Sample:	dead cells	live cells	dead cells	live cells
	48hrs_NALM6_50U_IL2_don2_day10_Experiment_Juno-LTR_1-1A.fcs	4558	686	2553	7205	0.932123	86.9184	73.8369
	48hrs_NALM6_50U_IL2_don2_day10_Experiment_Juno-LTR_1-1B.fcs	4466	616	2554	7172	0.927854	87.8788	73.7405
	48hrs_NALM6_50U_IL2_don2_day10_Experiment_Juno-LTR_1-1C.fcs	4792	652	2373	7152	0.925266	88.0235	75.0866
	48hrs_NALM6_50U_IL2_don2_day10_Experiment_Juno-LTR_1-2A.fcs	6988	1535	1692	4609	0.596274	81.9899	73.1471
	48hrs_NALM6_50U_IL2_don2_day10_Experiment_Juno-LTR_1-2B.fcs	6526	1379	1596	4254	0.550347	82.5553	72.7179
	48hrs_NALM6_50U_IL2_don2_day10_Experiment_Juno-LTR_1-2C.fcs	6428	1508	1665	4571	0.591358	80.998	73.3002
	48hrs_NALM6_50U_IL2_don2_day10_Experiment_Juno-LTR_1-4A.fcs	6273	2101	825	2145	0.277502	74.9104	72.2222
	48hrs_NALM6_50U_IL2_don2_day10_Experiment_Juno-LTR_1-4B.fcs	5850	1553	939	2087	0.269999	79.022	68.9689
	48hrs_NALM6_50U_IL2_don2_day10_Experiment_Juno-LTR_1-4C.fcs	6012	1532	922	1850	0.239338	79.6925	66.7388
	48hrs_NALM6_50U_IL2_don2_day10_Experiment_Juno-LTR_2-1A.fcs	2856	154	3260	8050	1.04144	94.8837	71.176
	48hrs_NALM6_50U_IL2_don2_day10_Experiment_Juno-LTR_2-1B.fcs	2718	150	3456	8215	1.06279	94.7699	70.3881
	48hrs_NALM6_50U_IL2_don2_day10_Experiment_Juno-LTR_2-1C.fcs	2942	243	3170	8287	1.0721	92.3705	72.3313
	Sample:	dead cells	live cells	dead cells	live cells
	48hrs_NALM6_50U_IL2_don2_day10_Experiment_Juno-TCRA_1-1A.fcs	1993	119	3394	8829	1.14222	94.3655	72.2327
	48hrs_NALM6_50U_IL2_don2_day10_Experiment_Juno-TCRA_1-1B.fcs	2067	128	3157	9151	1.18388	94.1686	74.35
	48hrs_NALM6_50U_IL2_don2_day10_Experiment_Juno-TCRA_1-1C.fcs	2130	123	3327	8828	1.14209	94.5406	72.6285
	48hrs_NALM6_50U_IL2_don2_day10_Experiment_Juno-TCRA_1-2A.fcs	3872	307	2859	7556	0.977532	92.6537	72.5492
	48hrs_NALM6_50U_IL2_don2_day10_Experiment_Juno-TCRA_1-2B.fcs	4126	271	2841	7246	0.937427	93.8367	71.835
	48hrs_NALM6_50U_IL2_don2_day10_Experiment_Juno-TCRA_1-2C.fcs	3888	255	2981	7585	0.981284	93.845	71.7869
	48hrs_NALM6_50U_IL2_don2_day10_Experiment_Juno-TCRA_1-4A.fcs	6199	772	2414	5684	0.735349	88.9255	70.1902
	48hrs_NALM6_50U_IL2_don2_day10_Experiment_Juno-TCRA_1-4B.fcs	6205	761	2435	5229	0.676485	89.0755	68.2281
	48hrs_NALM6_50U_IL2_don2_day10_Experiment_Juno-TCRA_1-4C.fcs	6119	703	2507	5311	0.687093	89.6951	67.933
	48hrs_NALM6_50U_IL2_don2_day10_Experiment_Juno-TCRA_2-1A.fcs	1171	46	3660	9808	1.26888	96.2202	72.8245
	48hrs_NALM6_50U_IL2_don2_day10_Experiment_Juno-TCRA_2-1B.fcs	1244	62	3649	9560	1.23679	95.2527	72.3749
	48hrs_NALM6_50U_IL2_don2_day10_Experiment_Juno-TCRA_2-1C.fcs	1172	71	3457	9960	1.28854	94.288	74.2342
	Sample:	dead cells	live cells	dead cells	live cells
	48hrs_NALM6_50U_IL2_don2_day10_Experiment_Juno_TCRB_1-1A.fcs	2067	89	3252	9217	1.19242	95.872	73.9193
	48hrs_NALM6_50U_IL2_don2_day10_Experiment_Juno_TCRB_1-1B.fcs	2107	96	3318	8940	1.15658	95.6423	72.932
	48hrs_NALM6_50U_IL2_don2_day10_Experiment_Juno_TCRB_1-1C.fcs	2136	108	3287	9182	1.18789	95.1872	73.6386
	48hrs_NALM6_50U_IL2_don2_day10_Experiment_Juno_TCRB_1-2A.fcs	3796	295	2988	7776	1.00599	92.789	72.2408
	48hrs_NALM6_50U_IL2_don2_day10_Experiment_Juno_TCRB_1-2B.fcs	4051	275	2823	7880	1.01945	93.6431	73.6242
	48hrs_NALM6_50U_IL2_don2_day10_Experiment_Juno_TCRB_1-2C.fcs	3978	310	2702	8100	1.04791	92.7705	74.9861
	48hrs_NALM6_50U_IL2_don2_day10_Experiment_Juno_TCRB_1-4A.fcs	6136	950	2205	6148	0.795377	86.5933	73.6023
	48hrs_NALM6_50U_IL2_don2_day10_Experiment_Juno_TCRB_1-4B.fcs	5992	616	2499	5781	0.747898	90.678	69.8188
	48hrs_NALM6_50U_IL2_don2_day10_Experiment_Juno_TCRB_1-4C.fcs	6142	774	2429	5826	0.753719	88.8086	70.5754
	48hrs_NALM6_50U_IL2_don2_day10_Experiment_Juno_TCRB_2-1A.fcs	1130	44	3392	8971	1.16059	96.2521	72.5633
	48hrs_NALM6_50U_IL2_don2_day10_Experiment_Juno_TCRB_2-1B.fcs	1135	51	3774	9717	1.2571	95.6998	72.0258
	48hrs_NALM6_50U_IL2_don2_day10_Experiment_Juno_TCRB_2-1C.fcs	1209	49	3446	9948	1.28699	96.1049	74.2721

## Sheet: N-72hrs
		NALM6	NALM6	T cells	T cells	Normalized live T cells	NALM6 dead %	CAR-T cells live %
	Sample:	dead cells	live cells	dead cells	live cells	(to 1:1 WPRE)
	72hrs_NALM6_50U_IL2_don2_day10_Experiment_Control_1-1A.fcs	3109	2617	1631	9674	0.949548	54.2962	85.5728		CAR-T to B tumor ratio	Control			WPRE			LTR			TCRA			TCRB
	72hrs_NALM6_50U_IL2_don2_day10_Experiment_Control_1-1B.fcs	2991	2513	1646	9882	0.969965	54.3423	85.7217		_2-1	72.1836	70.9237	71.6919	95.0375	94.2474	94.2238	94.8787	95.5168	94.9541	96.0383	95.1524	95.1286	95.9091	95.2251	94.8107
	72hrs_NALM6_50U_IL2_don2_day10_Experiment_Control_1-1C.fcs	3040	2498	1598	9825	0.96437	54.8935	86.0107		_1-1	54.2962	54.3423	54.8935	92.4094	91.5784	92.8783	91.7204	91.4908	92.8215	94.497	94.6494	92.2934	95.5729	95.7391	94.9167
	72hrs_NALM6_50U_IL2_don2_day10_Experiment_Control_1-2A.fcs	4210	4705	1083	6744	0.661955	47.2238	86.1633		_1-2	47.2238	45.465	45.8169	92.7637	93.2032	92.3569	90.0353	91.2405	90.9757	94.1577	94.1579	94.9571	95.5244	95.8352	95.3434
	72hrs_NALM6_50U_IL2_don2_day10_Experiment_Control_1-2B.fcs	3970	4762	1184	6753	0.662839	45.465	85.0825		_1-4	41.4814	41.5645	46.4066	88.8889	90.3871	91.4994	81.7102	82.6787	86.7148	93.4378	93.5577	94.6006	92.9335	94.1434	95.3791
	72hrs_NALM6_50U_IL2_don2_day10_Experiment_Control_1-2C.fcs	3943	4663	1099	7067	0.693659	45.8169	86.5418
	72hrs_NALM6_50U_IL2_don2_day10_Experiment_Control_1-4A.fcs	4794	6763	628	4283	0.420397	41.4814	87.2124
	72hrs_NALM6_50U_IL2_don2_day10_Experiment_Control_1-4B.fcs	4644	6529	639	4551	0.446702	41.5645	87.6879		CAR-T to B tumor ratio		Cntrl T cells			WPRE T cells			LTR T cells			TCRA T cells			TCRB T cells
	72hrs_NALM6_50U_IL2_don2_day10_Experiment_Control_1-4C.fcs	4972	5742	727	4834	0.47448	46.4066	86.9268		_2-1	1.16853	1.08186	1.13378	1.08746	1.05683	1.07793	0.96437	0.97978	1.00196	1.01737	1.02366	1.02434	1.06331	1.0427	1.07263
	72hrs_NALM6_50U_IL2_don2_day10_Experiment_Control_2-1A.fcs	2076	800	2338	11905	1.16853	72.1836	83.5849		_1-1	0.949548	0.969965	0.96437	0.981056	1.01777	1.00118	0.869454	0.871221	0.880448	1.06233	1.06537	1.06302	1.06449	1.08481	1.08589
	72hrs_NALM6_50U_IL2_don2_day10_Experiment_Control_2-1B.fcs	2288	938	2557	11022	1.08186	70.9237	81.1695		_1-2	0.661955	0.662839	0.693659	0.776404	0.807911	0.794366	0.626227	0.665194	0.644876	0.895269	0.993031	0.948861	0.973302	0.958579	0.96859
	72hrs_NALM6_50U_IL2_don2_day10_Experiment_Control_2-1C.fcs	2178	860	2331	11551	1.13378	71.6919	83.2085		_1-4	0.420397	0.446702	0.47448	0.607774	0.59521	0.577935	0.411366	0.426286	0.452984	0.770809	0.785336	0.787593	0.811052	0.792992	0.804083
	Sample:	dead cells	live cells	dead cells	live cells
	72hrs_NALM6_50U_IL2_don2_day10_Experiment_Juno_WPRE_1-1A.fcs	1887	155	2762	9995	0.981056	92.4094	78.3491
	72hrs_NALM6_50U_IL2_don2_day10_Experiment_Juno_WPRE_1-1B.fcs	1729	159	2819	10369	1.01777	91.5784	78.6245
	72hrs_NALM6_50U_IL2_don2_day10_Experiment_Juno_WPRE_1-1C.fcs	1878	144	2977	10200	1.00118	92.8783	77.4076
	72hrs_NALM6_50U_IL2_don2_day10_Experiment_Juno_WPRE_1-2A.fcs	3474	271	2805	7910	0.776404	92.7637	73.8217
	72hrs_NALM6_50U_IL2_don2_day10_Experiment_Juno_WPRE_1-2B.fcs	3771	275	2721	8231	0.807911	93.2032	75.1552
	72hrs_NALM6_50U_IL2_don2_day10_Experiment_Juno_WPRE_1-2C.fcs	3323	275	2880	8093	0.794366	92.3569	73.7538
	72hrs_NALM6_50U_IL2_don2_day10_Experiment_Juno_WPRE_1-4A.fcs	5312	664	2211	6192	0.607774	88.8889	73.688
	72hrs_NALM6_50U_IL2_don2_day10_Experiment_Juno_WPRE_1-4B.fcs	5651	601	2262	6064	0.59521	90.3871	72.8321
	72hrs_NALM6_50U_IL2_don2_day10_Experiment_Juno_WPRE_1-4C.fcs	5791	538	2285	5888	0.577935	91.4994	72.0421
	72hrs_NALM6_50U_IL2_don2_day10_Experiment_Juno_WPRE_2-1A.fcs	1015	53	3294	11079	1.08746	95.0375	77.082
	72hrs_NALM6_50U_IL2_don2_day10_Experiment_Juno_WPRE_2-1B.fcs	983	60	3326	10767	1.05683	94.2474	76.3996
	72hrs_NALM6_50U_IL2_don2_day10_Experiment_Juno_WPRE_2-1C.fcs	1044	64	3179	10982	1.07793	94.2238	77.551
	Sample:	dead cells	live cells	dead cells	live cells
	72hrs_NALM6_50U_IL2_don2_day10_Experiment_Juno-LTR_1-1A.fcs	2847	257	2821	8858	0.869454	91.7204	75.8455
	72hrs_NALM6_50U_IL2_don2_day10_Experiment_Juno-LTR_1-1B.fcs	2645	246	2944	8876	0.871221	91.4908	75.0931
	72hrs_NALM6_50U_IL2_don2_day10_Experiment_Juno-LTR_1-1C.fcs	2793	216	2955	8970	0.880448	92.8215	75.2201
	72hrs_NALM6_50U_IL2_don2_day10_Experiment_Juno-LTR_1-2A.fcs	4843	536	2613	6380	0.626227	90.0353	70.9441
	72hrs_NALM6_50U_IL2_don2_day10_Experiment_Juno-LTR_1-2B.fcs	5031	483	2584	6777	0.665194	91.2405	72.3961
	72hrs_NALM6_50U_IL2_don2_day10_Experiment_Juno-LTR_1-2C.fcs	4970	493	2737	6570	0.644876	90.9757	70.592
	72hrs_NALM6_50U_IL2_don2_day10_Experiment_Juno-LTR_1-4A.fcs	7358	1647	1808	4191	0.411366	81.7102	69.8616
	72hrs_NALM6_50U_IL2_don2_day10_Experiment_Juno-LTR_1-4B.fcs	7136	1495	1985	4343	0.426286	82.6787	68.6315
	72hrs_NALM6_50U_IL2_don2_day10_Experiment_Juno-LTR_1-4C.fcs	7689	1178	1916	4615	0.452984	86.7148	70.663
	72hrs_NALM6_50U_IL2_don2_day10_Experiment_Juno-LTR_2-1A.fcs	1408	76	3453	9825	0.96437	94.8787	73.9946
	72hrs_NALM6_50U_IL2_don2_day10_Experiment_Juno-LTR_2-1B.fcs	1534	72	3564	9982	0.97978	95.5168	73.6897
	72hrs_NALM6_50U_IL2_don2_day10_Experiment_Juno-LTR_2-1C.fcs	1449	77	3130	10208	1.00196	94.9541	76.5332
	Sample:	dead cells	live cells	dead cells	live cells
	72hrs_NALM6_50U_IL2_don2_day10_Experiment_Juno-TCRA_1-1A.fcs	1099	64	3252	10823	1.06233	94.497	76.8952
	72hrs_NALM6_50U_IL2_don2_day10_Experiment_Juno-TCRA_1-1B.fcs	1026	58	3354	10854	1.06537	94.6494	76.3936
	72hrs_NALM6_50U_IL2_don2_day10_Experiment_Juno-TCRA_1-1C.fcs	994	83	3381	10830	1.06302	92.2934	76.2086
	72hrs_NALM6_50U_IL2_don2_day10_Experiment_Juno-TCRA_1-2A.fcs	1660	103	2802	9121	0.895269	94.1577	76.4992
	72hrs_NALM6_50U_IL2_don2_day10_Experiment_Juno-TCRA_1-2B.fcs	1789	111	2969	10117	0.993031	94.1579	77.3116
	72hrs_NALM6_50U_IL2_don2_day10_Experiment_Juno-TCRA_1-2C.fcs	1770	94	3148	9667	0.948861	94.9571	75.435
	72hrs_NALM6_50U_IL2_don2_day10_Experiment_Juno-TCRA_1-4A.fcs	3517	247	2722	7853	0.770809	93.4378	74.26
	72hrs_NALM6_50U_IL2_don2_day10_Experiment_Juno-TCRA_1-4B.fcs	3253	224	2904	8001	0.785336	93.5577	73.37
	72hrs_NALM6_50U_IL2_don2_day10_Experiment_Juno-TCRA_1-4C.fcs	3434	196	2710	8024	0.787593	94.6006	74.7531
	72hrs_NALM6_50U_IL2_don2_day10_Experiment_Juno-TCRA_2-1A.fcs	703	29	4194	10365	1.01737	96.0383	71.1931
	72hrs_NALM6_50U_IL2_don2_day10_Experiment_Juno-TCRA_2-1B.fcs	687	35	4092	10429	1.02366	95.1524	71.8201
	72hrs_NALM6_50U_IL2_don2_day10_Experiment_Juno-TCRA_2-1C.fcs	703	36	3986	10436	1.02434	95.1286	72.3617
	Sample:	dead cells	live cells	dead cells	live cells
	72hrs_NALM6_50U_IL2_don2_day10_Experiment_Juno_TCRB_1-1A.fcs	1101	51	3240	10845	1.06449	95.5729	76.9968
	72hrs_NALM6_50U_IL2_don2_day10_Experiment_Juno_TCRB_1-1B.fcs	1101	49	3112	11052	1.08481	95.7391	78.0288
	72hrs_NALM6_50U_IL2_don2_day10_Experiment_Juno_TCRB_1-1C.fcs	1083	58	3302	11063	1.08589	94.9167	77.0136
	72hrs_NALM6_50U_IL2_don2_day10_Experiment_Juno_TCRB_1-2A.fcs	2113	99	3037	9916	0.973302	95.5244	76.5537
	72hrs_NALM6_50U_IL2_don2_day10_Experiment_Juno_TCRB_1-2B.fcs	2140	93	3141	9766	0.958579	95.8352	75.6644
	72hrs_NALM6_50U_IL2_don2_day10_Experiment_Juno_TCRB_1-2C.fcs	2027	99	3307	9868	0.96859	95.3434	74.8994
	72hrs_NALM6_50U_IL2_don2_day10_Experiment_Juno_TCRB_1-4A.fcs	3827	291	2861	8263	0.811052	92.9335	74.2808
	72hrs_NALM6_50U_IL2_don2_day10_Experiment_Juno_TCRB_1-4B.fcs	3649	227	2850	8079	0.792992	94.1434	73.9226
	72hrs_NALM6_50U_IL2_don2_day10_Experiment_Juno_TCRB_1-4C.fcs	4025	195	2742	8192	0.804083	95.3791	74.9223
	72hrs_NALM6_50U_IL2_don2_day10_Experiment_Juno_TCRB_2-1A.fcs	633	27	3940	10833	1.06331	95.9091	73.3297
	72hrs_NALM6_50U_IL2_don2_day10_Experiment_Juno_TCRB_2-1B.fcs	698	35	3950	10623	1.0427	95.2251	72.8951
	72hrs_NALM6_50U_IL2_don2_day10_Experiment_Juno_TCRB_2-1C.fcs	676	37	3791	10928	1.07263	94.8107	74.2442

## Sheet: J-24hrs
		Jeko1	Jeko1	T cells	T cells	Normalized live T cells	Jeko1 dead %	CAR-T cells live %
	Sample:	dead cells	live cells	dead cells	live cells	(to 1:1 WPRE)
	24hrs_Jeko1_50U_IL2_don2_day_10_Experiment_Control_1-1A.fcs	764	4534	1344	11260	1.20252	14.4205	89.3367		CAR-T to B tumor ratio		Control			WPRE			LTR			TCRA			TCRB
	24hrs_Jeko1_50U_IL2_don2_day_10_Experiment_Control_1-1B.fcs	822	4465	1375	11219	1.19814	15.5476	89.0821		_2-1	35.9059	24.8746	24.1254	79.5636	77.0964	76.7949	75.6976	68.8413	68.7239	90.3884	88.5824	90.1472	89.1892	89.4362	90.1887
	24hrs_Jeko1_50U_IL2_don2_day_10_Experiment_Control_1-1C.fcs	791	4536	1387	11298	1.20658	14.8489	89.0658		_1-1	14.4205	15.5476	14.8489	66.005	64.2197	64.7225	52.0715	56.6003	55.8524	80.5954	81.1484	81.5358	77.9582	80.3638	78.1758
	24hrs_Jeko1_50U_IL2_don2_day_10_Experiment_Control_1-2A.fcs	894	6346	918	7096	0.757823	12.3481	88.545		_1-2	12.3481	13.0058	13.4755	56.3146	56.2334	58.0036	45.9728	46.001	48.2441	74.8255	72.5809	75.3758	70.2986	71.4286	72.2371
	24hrs_Jeko1_50U_IL2_don2_day_10_Experiment_Control_1-2B.fcs	945	6321	896	7545	0.805774	13.0058	89.3851		_1-4	12.1536	11.2339	12.7925	45.7966	48.1876	55.5439	34.543	37.5515	43.4725	63.9384	69.0786	76.0083	65.6146	69.2321	72.7171
	24hrs_Jeko1_50U_IL2_don2_day_10_Experiment_Control_1-2C.fcs	948	6087	902	7567	0.808124	13.4755	89.3494
	24hrs_Jeko1_50U_IL2_don2_day_10_Experiment_Control_1-4A.fcs	943	6816	499	3915	0.418105	12.1536	88.6951
	24hrs_Jeko1_50U_IL2_don2_day_10_Experiment_Control_1-4B.fcs	803	6345	410	3626	0.387241	11.2339	89.8414		CAR-T to B tumor ratio		Cntrl T cells			WPRE T cells			LTR T cells			TCRA T cells			TCRB T cells
	24hrs_Jeko1_50U_IL2_don2_day_10_Experiment_Control_1-4C.fcs	902	6149	460	3931	0.419814	12.7925	89.524		_2-1	1.42658	1.4034	1.39219	1.09252	1.10779	1.13834	1.01638	1.05183	1.10576	1.16044	1.18864	1.22922	1.23018	1.22943	1.24139
	24hrs_Jeko1_50U_IL2_don2_day_10_Experiment_Control_2-1A.fcs	977	1744	1575	13358	1.42658	35.9059	89.4529		_1-1	1.20252	1.19814	1.20658	0.981774	1.00441	1.01381	0.911288	0.886085	0.873376	1.15318	1.1283	1.13876	1.2148	1.19921	1.20818
	24hrs_Jeko1_50U_IL2_don2_day_10_Experiment_Control_2-1B.fcs	744	2247	1585	13141	1.4034	24.8746	89.2367		_1-2	0.757823	0.805774	0.808124	0.519241	0.530027	0.495746	0.390979	0.401979	0.40796	0.97889	0.949094	0.94322	1.0262	1.04553	1.06315
	24hrs_Jeko1_50U_IL2_don2_day_10_Experiment_Control_2-1C.fcs	662	2082	1400	13036	1.39219	24.1254	90.302		_1-4	0.418105	0.387241	0.419814	0.240718	0.211776	0.23698	0.207397	0.187854	0.201203	0.572212	0.554804	0.549251	0.650707	0.565911	0.648571
	Sample:	dead cells	live cells	dead cells	live cells
	24hrs_Jeko1_50U_IL2_don2_day_10_Experiment_Juno_WPRE_1-1A.fcs	3425	1764	2709	9193	0.981774	66.005	77.2391
	24hrs_Jeko1_50U_IL2_don2_day_10_Experiment_Juno_WPRE_1-1B.fcs	3473	1935	2198	9405	1.00441	64.2197	81.0566
	24hrs_Jeko1_50U_IL2_don2_day_10_Experiment_Juno_WPRE_1-1C.fcs	3440	1875	2299	9493	1.01381	64.7225	80.5037
	24hrs_Jeko1_50U_IL2_don2_day_10_Experiment_Juno_WPRE_1-2A.fcs	3759	2916	1230	4862	0.519241	56.3146	79.8096
	24hrs_Jeko1_50U_IL2_don2_day_10_Experiment_Juno_WPRE_1-2B.fcs	3816	2970	1152	4963	0.530027	56.2334	81.1611
	24hrs_Jeko1_50U_IL2_don2_day_10_Experiment_Juno_WPRE_1-2C.fcs	3870	2802	1228	4642	0.495746	58.0036	79.0801
	24hrs_Jeko1_50U_IL2_don2_day_10_Experiment_Juno_WPRE_1-4A.fcs	3067	3630	592	2254	0.240718	45.7966	79.1989
	24hrs_Jeko1_50U_IL2_don2_day_10_Experiment_Juno_WPRE_1-4B.fcs	3164	3402	513	1983	0.211776	48.1876	79.4471
	24hrs_Jeko1_50U_IL2_don2_day_10_Experiment_Juno_WPRE_1-4C.fcs	3717	2975	589	2219	0.23698	55.5439	79.0242
	24hrs_Jeko1_50U_IL2_don2_day_10_Experiment_Juno_WPRE_2-1A.fcs	2589	665	3062	10230	1.09252	79.5636	76.9636
	24hrs_Jeko1_50U_IL2_don2_day_10_Experiment_Juno_WPRE_2-1B.fcs	2464	732	3225	10373	1.10779	77.0964	76.2833
	24hrs_Jeko1_50U_IL2_don2_day_10_Experiment_Juno_WPRE_2-1C.fcs	2396	724	2809	10659	1.13834	76.7949	79.1432
	Sample:	dead cells	live cells	dead cells	live cells
	24hrs_Jeko1_50U_IL2_don2_day_10_Experiment_Juno_LTR_1-1A.fcs	3469	3193	1898	8533	0.911288	52.0715	81.8042
	24hrs_Jeko1_50U_IL2_don2_day_10_Experiment_Juno_LTR_1-1B.fcs	3666	2811	1980	8297	0.886085	56.6003	80.7337
	24hrs_Jeko1_50U_IL2_don2_day_10_Experiment_Juno_LTR_1-1C.fcs	3679	2908	2112	8178	0.873376	55.8524	79.4752
	24hrs_Jeko1_50U_IL2_don2_day_10_Experiment_Juno_LTR_1-2A.fcs	2911	3421	906	3661	0.390979	45.9728	80.162
	24hrs_Jeko1_50U_IL2_don2_day_10_Experiment_Juno_LTR_1-2B.fcs	2893	3396	871	3764	0.401979	46.001	81.2082
	24hrs_Jeko1_50U_IL2_don2_day_10_Experiment_Juno_LTR_1-2C.fcs	3091	3316	961	3820	0.40796	48.2441	79.8996
	24hrs_Jeko1_50U_IL2_don2_day_10_Experiment_Juno_LTR_1-4A.fcs	2532	4798	496	1942	0.207397	34.543	79.6555
	24hrs_Jeko1_50U_IL2_don2_day_10_Experiment_Juno_LTR_1-4B.fcs	2552	4244	419	1759	0.187854	37.5515	80.7622
	24hrs_Jeko1_50U_IL2_don2_day_10_Experiment_Juno_LTR_1-4C.fcs	2937	3819	489	1884	0.201203	43.4725	79.3932
	24hrs_Jeko1_50U_IL2_don2_day_10_Experiment_Juno_LTR_2-1A.fcs	2984	958	2738	9517	1.01638	75.6976	77.6581
	24hrs_Jeko1_50U_IL2_don2_day_10_Experiment_Juno_LTR_2-1B.fcs	2828	1280	2940	9849	1.05183	68.8413	77.0115
	24hrs_Jeko1_50U_IL2_don2_day_10_Experiment_Juno_LTR_2-1C.fcs	2795	1272	2608	10354	1.10576	68.7239	79.8796
	Sample:	dead cells	live cells	dead cells	live cells
	24hrs_Jeko1_50U_IL2_don2_day_10_Experiment_Juno_TCRA_1-1A.fcs	2301	554	3158	10798	1.15318	80.5954	77.3717
	24hrs_Jeko1_50U_IL2_don2_day_10_Experiment_Juno_TCRA_1-1B.fcs	2346	545	3113	10565	1.1283	81.1484	77.2408
	24hrs_Jeko1_50U_IL2_don2_day_10_Experiment_Juno_TCRA_1-1C.fcs	2389	541	3305	10663	1.13876	81.5358	76.3388
	24hrs_Jeko1_50U_IL2_don2_day_10_Experiment_Juno_TCRA_1-2A.fcs	3751	1262	2704	9166	0.97889	74.8255	77.2199
	24hrs_Jeko1_50U_IL2_don2_day_10_Experiment_Juno_TCRA_1-2B.fcs	3968	1499	2472	8887	0.949094	72.5809	78.2375
	24hrs_Jeko1_50U_IL2_don2_day_10_Experiment_Juno_TCRA_1-2C.fcs	4062	1327	2563	8832	0.94322	75.3758	77.5077
	24hrs_Jeko1_50U_IL2_don2_day_10_Experiment_Juno_TCRA_1-4A.fcs	4273	2410	1491	5358	0.572212	63.9384	78.2304
	24hrs_Jeko1_50U_IL2_don2_day_10_Experiment_Juno_TCRA_1-4B.fcs	4678	2094	1448	5195	0.554804	69.0786	78.2026
	24hrs_Jeko1_50U_IL2_don2_day_10_Experiment_Juno_TCRA_1-4C.fcs	4768	1505	1439	5143	0.549251	76.0083	78.1373
	24hrs_Jeko1_50U_IL2_don2_day_10_Experiment_Juno_TCRA_2-1A.fcs	1373	146	3417	10866	1.16044	90.3884	76.0765
	24hrs_Jeko1_50U_IL2_don2_day_10_Experiment_Juno_TCRA_2-1B.fcs	1381	178	3554	11130	1.18864	88.5824	75.7968
	24hrs_Jeko1_50U_IL2_don2_day_10_Experiment_Juno_TCRA_2-1C.fcs	1409	154	3101	11510	1.22922	90.1472	78.7763
	Sample:	dead cells	live cells	dead cells	live cells
	24hrs_Jeko1_50U_IL2_don2_day_10_Experiment_Juno_TCRB_1-1A.fcs	2161	611	2997	11375	1.2148	77.9582	79.147
	24hrs_Jeko1_50U_IL2_don2_day_10_Experiment_Juno_TCRB_1-1B.fcs	2165	529	2989	11229	1.19921	80.3638	78.9774
	24hrs_Jeko1_50U_IL2_don2_day_10_Experiment_Juno_TCRB_1-1C.fcs	2117	591	3071	11313	1.20818	78.1758	78.6499
	24hrs_Jeko1_50U_IL2_don2_day_10_Experiment_Juno_TCRB_1-2A.fcs	3555	1502	2369	9609	1.0262	70.2986	80.2221
	24hrs_Jeko1_50U_IL2_don2_day_10_Experiment_Juno_TCRB_1-2B.fcs	3495	1398	2320	9790	1.04553	71.4286	80.8423
	24hrs_Jeko1_50U_IL2_don2_day_10_Experiment_Juno_TCRB_1-2C.fcs	3510	1349	2298	9955	1.06315	72.2371	81.2454
	24hrs_Jeko1_50U_IL2_don2_day_10_Experiment_Juno_TCRB_1-4A.fcs	4324	2266	1548	6093	0.650707	65.6146	79.7409
	24hrs_Jeko1_50U_IL2_don2_day_10_Experiment_Juno_TCRB_1-4B.fcs	4084	1815	1254	5299	0.565911	69.2321	80.8637
	24hrs_Jeko1_50U_IL2_don2_day_10_Experiment_Juno_TCRB_1-4C.fcs	4563	1712	1474	6073	0.648571	72.7171	80.4691
	24hrs_Jeko1_50U_IL2_don2_day_10_Experiment_Juno_TCRB_2-1A.fcs	1287	156	3379	11519	1.23018	89.1892	77.3191
	24hrs_Jeko1_50U_IL2_don2_day_10_Experiment_Juno_TCRB_2-1B.fcs	1380	163	3473	11512	1.22943	89.4362	76.8235
	24hrs_Jeko1_50U_IL2_don2_day_10_Experiment_Juno_TCRB_2-1C.fcs	1434	156	3195	11624	1.24139	90.1887	78.4398

## Sheet: J-48hrs
		Jeko1	Jeko1	T cells	T cells	Normalized live T cells	Jeko1 dead %	CAR-T cells live %
	Sample:	dead cells	live cells	dead cells	live cells	(to 1:1 WPRE)
	48hrs_Jeko1_50U_IL2_don2_day_10(1)_Experiment_Control_1-1A.fcs	2687	2152	1455	11140	1.24823	55.528	88.4478		CAR-T to B tumor ratio	Control			WPRE			LTR			TCRA			TCRB
	48hrs_Jeko1_50U_IL2_don2_day_10(1)_Experiment_Control_1-1B.fcs	2776	1906	1359	11276	1.26346	59.2909	89.2442		_2-1	75.6582	73.7918	73.2654	93.2308	91.8157	90.6412	91.8214	92.769	92.4363	98.9726	95.6835	96.1194	97.3533	96.99	96.6046
	48hrs_Jeko1_50U_IL2_don2_day_10(1)_Experiment_Control_1-1C.fcs	2759	1820	1468	11504	1.28901	60.2533	88.6833		_1-1	55.528	59.2909	60.2533	88.835	89.7164	89.8049	86.3802	87.0441	89.4725	94.6918	94.0394	95.1814	95.9459	94.7009	95.4939
	48hrs_Jeko1_50U_IL2_don2_day_10(1)_Experiment_Control_1-2A.fcs	3495	3676	1070	8496	0.951968	48.738	88.8146		_1-2	48.738	45.5714	48.7898	87.3914	87.5401	87.989	85.0372	84.7716	85.0342	92.6634	94.1	94.0294	93.1439	92.4907	92.3151
	48hrs_Jeko1_50U_IL2_don2_day_10(1)_Experiment_Control_1-2B.fcs	3298	3939	1037	8639	0.967991	45.5714	89.2828		_1-4	37.1102	43.4261	44.6809	82.1338	85.5524	89.3741	79.5232	82.2427	85.6225	89.7803	90.656	92.9212	90.6084	90.997	92.8038
	48hrs_Jeko1_50U_IL2_don2_day_10(1)_Experiment_Control_1-2C.fcs	3467	3639	1063	8777	0.983454	48.7898	89.1972
	48hrs_Jeko1_50U_IL2_don2_day_10(1)_Experiment_Control_1-4A.fcs	2987	5062	552	4410	0.494136	37.1102	88.8755
	48hrs_Jeko1_50U_IL2_don2_day_10(1)_Experiment_Control_1-4B.fcs	3402	4432	589	4410	0.494136	43.4261	88.2176		CAR-T to B tumor ratio		Cntrl T cells			WPRE T cells			LTR T cells			TCRA T cells			TCRB T cells
	48hrs_Jeko1_50U_IL2_don2_day_10(1)_Experiment_Control_1-4C.fcs	3465	4290	608	4889	0.547808	44.6809	88.9394		_2-1	1.48734	1.46571	1.51602	1.06839	1.04721	1.08766	0.987152	1.04396	1.05998	1.16654	1.18458	1.18425	1.21954	1.20643	1.21383
	48hrs_Jeko1_50U_IL2_don2_day_10(1)_Experiment_Control_2-1A.fcs	1753	564	1714	13274	1.48734	75.6582	88.5642		_1-1	1.24823	1.26346	1.28901	1.01472	0.972025	1.01326	0.928774	0.959812	0.915776	1.07298	1.06906	1.09707	1.13001	1.08419	1.10716
	48hrs_Jeko1_50U_IL2_don2_day_10(1)_Experiment_Control_2-1B.fcs	1985	705	1961	13081	1.46571	73.7918	86.9632		_1-2	0.951968	0.967991	0.983454	0.815493	0.802831	0.815941	0.658176	0.630724	0.599798	0.984126	0.978076	0.970793	1.04262	1.03556	1.0462
	48hrs_Jeko1_50U_IL2_don2_day_10(1)_Experiment_Control_2-1C.fcs	1869	682	1838	13530	1.51602	73.2654	88.0401		_1-4	0.494136	0.494136	0.547808	0.481138	0.404609	0.420632	0.318443	0.276201	0.277209	0.839471	0.791738	0.802943	0.838351	0.833533	0.852917
	Sample:	dead cells	live cells	dead cells	live cells
	48hrs_Jeko1_50U_IL2_don2_day_10(1)_Experiment_Juno_WPRE_1-1A.fcs	2928	368	2608	9056	1.01472	88.835	77.6406
	48hrs_Jeko1_50U_IL2_don2_day_10(1)_Experiment_Juno_WPRE_1-1B.fcs	2879	330	2875	8675	0.972025	89.7164	75.1082
	48hrs_Jeko1_50U_IL2_don2_day_10(1)_Experiment_Juno_WPRE_1-1C.fcs	2854	324	2857	9043	1.01326	89.8049	75.9916
	48hrs_Jeko1_50U_IL2_don2_day_10(1)_Experiment_Juno_WPRE_1-2A.fcs	4727	682	2451	7278	0.815493	87.3914	74.8073
	48hrs_Jeko1_50U_IL2_don2_day_10(1)_Experiment_Juno_WPRE_1-2B.fcs	4911	699	2448	7165	0.802831	87.5401	74.5345
	48hrs_Jeko1_50U_IL2_don2_day_10(1)_Experiment_Juno_WPRE_1-2C.fcs	4791	654	2263	7282	0.815941	87.989	76.2913
	48hrs_Jeko1_50U_IL2_don2_day_10(1)_Experiment_Juno_WPRE_1-4A.fcs	5820	1266	1480	4294	0.481138	82.1338	74.3679
	48hrs_Jeko1_50U_IL2_don2_day_10(1)_Experiment_Juno_WPRE_1-4B.fcs	5661	956	1280	3611	0.404609	85.5524	73.8295
	48hrs_Jeko1_50U_IL2_don2_day_10(1)_Experiment_Juno_WPRE_1-4C.fcs	5812	691	1476	3754	0.420632	89.3741	71.7782
	48hrs_Jeko1_50U_IL2_don2_day_10(1)_Experiment_Juno_WPRE_2-1A.fcs	1515	110	3626	9535	1.06839	93.2308	72.4489
	48hrs_Jeko1_50U_IL2_don2_day_10(1)_Experiment_Juno_WPRE_2-1B.fcs	1694	151	3540	9346	1.04721	91.8157	72.5283
	48hrs_Jeko1_50U_IL2_don2_day_10(1)_Experiment_Juno_WPRE_2-1C.fcs	1569	162	3363	9707	1.08766	90.6412	74.2693
	Sample:	dead cells	live cells	dead cells	live cells
	48hrs_Jeko1_50U_IL2_don2_day_10(1)_Experiment_Juno_LTR_1-1A.fcs	3799	599	2716	8289	0.928774	86.3802	75.3203
	48hrs_Jeko1_50U_IL2_don2_day_10(1)_Experiment_Juno_LTR_1-1B.fcs	3675	547	2781	8566	0.959812	87.0441	75.4913
	48hrs_Jeko1_50U_IL2_don2_day_10(1)_Experiment_Juno_LTR_1-1C.fcs	3918	461	2653	8173	0.915776	89.4725	75.4942
	48hrs_Jeko1_50U_IL2_don2_day_10(1)_Experiment_Juno_LTR_1-2A.fcs	5831	1026	2054	5874	0.658176	85.0372	74.0918
	48hrs_Jeko1_50U_IL2_don2_day_10(1)_Experiment_Juno_LTR_1-2B.fcs	5717	1027	2031	5629	0.630724	84.7716	73.4856
	48hrs_Jeko1_50U_IL2_don2_day_10(1)_Experiment_Juno_LTR_1-2C.fcs	5716	1006	1672	5353	0.599798	85.0342	76.1993
	48hrs_Jeko1_50U_IL2_don2_day_10(1)_Experiment_Juno_LTR_1-4A.fcs	5604	1443	1046	2842	0.318443	79.5232	73.0967
	48hrs_Jeko1_50U_IL2_don2_day_10(1)_Experiment_Juno_LTR_1-4B.fcs	5882	1270	829	2465	0.276201	82.2427	74.833
	48hrs_Jeko1_50U_IL2_don2_day_10(1)_Experiment_Juno_LTR_1-4C.fcs	5866	985	939	2474	0.277209	85.6225	72.4875
	48hrs_Jeko1_50U_IL2_don2_day_10(1)_Experiment_Juno_LTR_2-1A.fcs	2077	185	3498	8810	0.987152	91.8214	71.5795
	48hrs_Jeko1_50U_IL2_don2_day_10(1)_Experiment_Juno_LTR_2-1B.fcs	2181	170	3370	9317	1.04396	92.769	73.4374
	48hrs_Jeko1_50U_IL2_don2_day_10(1)_Experiment_Juno_LTR_2-1C.fcs	2322	190	3257	9460	1.05998	92.4363	74.3886
	Sample:	dead cells	live cells	dead cells	live cells
	48hrs_Jeko1_50U_IL2_don2_day_10(1)_Experiment_Juno_TCRA_1-1A.fcs	1659	93	3498	9576	1.07298	94.6918	73.2446
	48hrs_Jeko1_50U_IL2_don2_day_10(1)_Experiment_Juno_TCRA_1-1B.fcs	1625	103	3615	9541	1.06906	94.0394	72.522
	48hrs_Jeko1_50U_IL2_don2_day_10(1)_Experiment_Juno_TCRA_1-1C.fcs	1758	89	3498	9791	1.09707	95.1814	73.6775
	48hrs_Jeko1_50U_IL2_don2_day_10(1)_Experiment_Juno_TCRA_1-2A.fcs	3006	238	3087	8783	0.984126	92.6634	73.9933
	48hrs_Jeko1_50U_IL2_don2_day_10(1)_Experiment_Juno_TCRA_1-2B.fcs	2823	177	3234	8729	0.978076	94.1	72.9666
	48hrs_Jeko1_50U_IL2_don2_day_10(1)_Experiment_Juno_TCRA_1-2C.fcs	2945	187	3091	8664	0.970793	94.0294	73.7048
	48hrs_Jeko1_50U_IL2_don2_day_10(1)_Experiment_Juno_TCRA_1-4A.fcs	4577	521	2615	7492	0.839471	89.7803	74.1268
	48hrs_Jeko1_50U_IL2_don2_day_10(1)_Experiment_Juno_TCRA_1-4B.fcs	4851	500	2541	7066	0.791738	90.656	73.5505
	48hrs_Jeko1_50U_IL2_don2_day_10(1)_Experiment_Juno_TCRA_1-4C.fcs	4870	371	2640	7166	0.802943	92.9212	73.0777
	48hrs_Jeko1_50U_IL2_don2_day_10(1)_Experiment_Juno_TCRA_2-1A.fcs	867	9	3845	10411	1.16654	98.9726	73.0289
	48hrs_Jeko1_50U_IL2_don2_day_10(1)_Experiment_Juno_TCRA_2-1B.fcs	931	42	3744	10572	1.18458	95.6835	73.8474
	48hrs_Jeko1_50U_IL2_don2_day_10(1)_Experiment_Juno_TCRA_2-1C.fcs	966	39	3817	10569	1.18425	96.1194	73.4673
	Sample:	dead cells	live cells	dead cells	live cells
	48hrs_Jeko1_50U_IL2_don2_day_10(1)_Experiment_Juno_TCRB_1-1A.fcs	1704	72	3521	10085	1.13001	95.9459	74.1217
	48hrs_Jeko1_50U_IL2_don2_day_10(1)_Experiment_Juno_TCRB_1-1B.fcs	1662	93	3598	9676	1.08419	94.7009	72.8944
	48hrs_Jeko1_50U_IL2_don2_day_10(1)_Experiment_Juno_TCRB_1-1C.fcs	1653	78	3448	9881	1.10716	95.4939	74.1316
	48hrs_Jeko1_50U_IL2_don2_day_10(1)_Experiment_Juno_TCRB_1-2A.fcs	3016	222	3045	9305	1.04262	93.1439	75.3441
	48hrs_Jeko1_50U_IL2_don2_day_10(1)_Experiment_Juno_TCRB_1-2B.fcs	2993	243	3096	9242	1.03556	92.4907	74.9068
	48hrs_Jeko1_50U_IL2_don2_day_10(1)_Experiment_Juno_TCRB_1-2C.fcs	2871	239	3030	9337	1.0462	92.3151	75.4993
	48hrs_Jeko1_50U_IL2_don2_day_10(1)_Experiment_Juno_TCRB_1-4A.fcs	5123	531	2488	7482	0.838351	90.6084	75.0451
	48hrs_Jeko1_50U_IL2_don2_day_10(1)_Experiment_Juno_TCRB_1-4B.fcs	5084	503	2477	7439	0.833533	90.997	75.0202
	48hrs_Jeko1_50U_IL2_don2_day_10(1)_Experiment_Juno_TCRB_1-4C.fcs	4720	366	2644	7612	0.852917	92.8038	74.22
	48hrs_Jeko1_50U_IL2_don2_day_10(1)_Experiment_Juno_TCRB_2-1A.fcs	846	23	3797	10884	1.21954	97.3533	74.1366
	48hrs_Jeko1_50U_IL2_don2_day_10(1)_Experiment_Juno_TCRB_2-1B.fcs	870	27	3845	10767	1.20643	96.99	73.686
	48hrs_Jeko1_50U_IL2_don2_day_10(1)_Experiment_Juno_TCRB_2-1C.fcs	882	31	3704	10833	1.21383	96.6046	74.5202

## Sheet: J-72hrs
		Jeko1	Jeko1	T cells	T cells	Normalized live T cells	Jeko1 dead %	CAR-T cells live %
	Sample:	dead cells	live cells	dead cells	live cells	(to 1:1 WPRE)
	72hrs_Jeko1_50U_IL2_don2_day_10_Experiment_Control_1-1A.fcs	3001	718	1685	11589	1.1752	80.6937	87.306		CAR-T to B tumor ratio	Control			WPRE			LTR			TCRA			TCRB
	72hrs_Jeko1_50U_IL2_don2_day_10_Experiment_Control_1-1B.fcs	3156	882	1626	11654	1.18179	78.1575	87.756		_2-1	92.138	93.6148	91.0078	97.0874	95.6242	97.1698	97.7099	96.31	96.3913	97.541	97.9592	97.7312	96.53	96.371	97.479
	72hrs_Jeko1_50U_IL2_don2_day_10_Experiment_Control_1-1C.fcs	3332	699	1742	11805	1.1971	82.6594	87.1411		_1-1	80.6937	78.1575	82.6594	93.7874	93.3756	94.2177	94.3366	94.2631	94.742	98.0198	96.5101	96.8153	96.16	96.4143	95.3576
	72hrs_Jeko1_50U_IL2_don2_day_10_Experiment_Control_1-2A.fcs	4586	1971	1297	9078	0.920565	69.9405	87.4988		_1-2	69.9405	72.1708	73.571	94.4996	94.7648	93.6851	95.5473	94.911	94.7161	96.2602	94.9503	96.9254	95.2607	96.2138	97.7192
	72hrs_Jeko1_50U_IL2_don2_day_10_Experiment_Control_1-2B.fcs	4987	1923	1355	8740	0.88629	72.1708	86.5775		_1-4	61.7447	58.6624	65.8262	93.0855	93.6182	95.0183	92.7149	92.4614	92.9295	96.0967	96.2513	97.5402	96.0136	96.5214	96.3576
	72hrs_Jeko1_50U_IL2_don2_day_10_Experiment_Control_1-2C.fcs	4891	1757	1375	8917	0.904239	73.571	86.6401
	72hrs_Jeko1_50U_IL2_don2_day_10_Experiment_Control_1-4A.fcs	5549	3438	859	5964	0.604786	61.7447	87.4102
	72hrs_Jeko1_50U_IL2_don2_day_10_Experiment_Control_1-4B.fcs	5184	3653	800	5510	0.558748	58.6624	87.3217		CAR-T to B tumor ratio		Cntrl T cells			WPRE T cells			LTR T cells			TCRA T cells			TCRB T cells
	72hrs_Jeko1_50U_IL2_don2_day_10_Experiment_Control_1-4C.fcs	5430	2819	880	6310	0.639873	65.8262	87.7608		_2-1	1.32082	1.25713	1.30408	1.05381	1.02572	1.03951	0.897445	0.974006	0.974716	1.05787	1.07572	1.11567	1.12044	1.08718	1.10847
	72hrs_Jeko1_50U_IL2_don2_day_10_Experiment_Control_2-1A.fcs	1629	139	1876	13025	1.32082	92.138	87.4102		_1-1	1.1752	1.18179	1.1971	0.955347	1.02481	1.01984	0.93101	0.964981	0.997127	1.05087	1.1103	1.10695	1.10756	1.13007	1.12034
	72hrs_Jeko1_50U_IL2_don2_day_10_Experiment_Control_2-1B.fcs	1774	121	2135	12397	1.25713	93.6148	85.3083		_1-2	0.920565	0.88629	0.904239	0.927258	0.946829	0.907078	0.857085	0.832545	0.856476	1.06355	1.03485	1.02856	1.05239	1.04398	1.05057
	72hrs_Jeko1_50U_IL2_don2_day_10_Experiment_Control_2-1C.fcs	1761	174	2086	12860	1.30408	91.0078	86.0431		_1-4	0.604786	0.558748	0.639873	0.782754	0.803137	0.891563	0.698993	0.699094	0.780523	0.951088	0.942469	0.978772	0.978975	0.979685	1.03607
	Sample:	dead cells	live cells	dead cells	live cells
	72hrs_Jeko1_50U_IL2_don2_day_10_Experiment_Juno_WPRE_1-1A.fcs	1253	83	3259	9421	0.955347	93.7874	74.2981
	72hrs_Jeko1_50U_IL2_don2_day_10_Experiment_Juno_WPRE_1-1B.fcs	1325	94	3454	10106	1.02481	93.3756	74.528
	72hrs_Jeko1_50U_IL2_don2_day_10_Experiment_Juno_WPRE_1-1C.fcs	1385	85	3347	10057	1.01984	94.2177	75.0298
	72hrs_Jeko1_50U_IL2_don2_day_10_Experiment_Juno_WPRE_1-2A.fcs	2285	133	3374	9144	0.927258	94.4996	73.0468
	72hrs_Jeko1_50U_IL2_don2_day_10_Experiment_Juno_WPRE_1-2B.fcs	2317	128	3227	9337	0.946829	94.7648	74.3155
	72hrs_Jeko1_50U_IL2_don2_day_10_Experiment_Juno_WPRE_1-2C.fcs	2255	152	3254	8945	0.907078	93.6851	73.3257
	72hrs_Jeko1_50U_IL2_don2_day_10_Experiment_Juno_WPRE_1-4A.fcs	3931	292	2766	7719	0.782754	93.0855	73.6195
	72hrs_Jeko1_50U_IL2_don2_day_10_Experiment_Juno_WPRE_1-4B.fcs	3506	239	2978	7920	0.803137	93.6182	72.6739
	72hrs_Jeko1_50U_IL2_don2_day_10_Experiment_Juno_WPRE_1-4C.fcs	3376	177	2803	8792	0.891563	95.0183	75.8258
	72hrs_Jeko1_50U_IL2_don2_day_10_Experiment_Juno_WPRE_2-1A.fcs	700	21	3270	10392	1.05381	97.0874	76.065
	72hrs_Jeko1_50U_IL2_don2_day_10_Experiment_Juno_WPRE_2-1B.fcs	743	34	3215	10115	1.02572	95.6242	75.8815
	72hrs_Jeko1_50U_IL2_don2_day_10_Experiment_Juno_WPRE_2-1C.fcs	721	21	3406	10251	1.03951	97.1698	75.0604
	Sample:	dead cells	live cells	dead cells	live cells
	72hrs_Jeko1_50U_IL2_don2_day_10_Experiment_Juno_LTR_1-1A.fcs	1749	105	3313	9181	0.93101	94.3366	73.4833
	72hrs_Jeko1_50U_IL2_don2_day_10_Experiment_Juno_LTR_1-1B.fcs	2021	123	3478	9516	0.964981	94.2631	73.2338
	72hrs_Jeko1_50U_IL2_don2_day_10_Experiment_Juno_LTR_1-1C.fcs	1946	108	3259	9833	0.997127	94.742	75.1069
	72hrs_Jeko1_50U_IL2_don2_day_10_Experiment_Juno_LTR_1-2A.fcs	3326	155	3336	8452	0.857085	95.5473	71.7
	72hrs_Jeko1_50U_IL2_don2_day_10_Experiment_Juno_LTR_1-2B.fcs	3413	183	3282	8210	0.832545	94.911	71.441
	72hrs_Jeko1_50U_IL2_don2_day_10_Experiment_Juno_LTR_1-2C.fcs	3370	188	3064	8446	0.856476	94.7161	73.3797
	72hrs_Jeko1_50U_IL2_don2_day_10_Experiment_Juno_LTR_1-4A.fcs	5447	428	2386	6893	0.698993	92.7149	74.286
	72hrs_Jeko1_50U_IL2_don2_day_10_Experiment_Juno_LTR_1-4B.fcs	5090	415	2671	6894	0.699094	92.4614	72.0753
	72hrs_Jeko1_50U_IL2_don2_day_10_Experiment_Juno_LTR_1-4C.fcs	4955	377	2436	7697	0.780523	92.9295	75.9597
	72hrs_Jeko1_50U_IL2_don2_day_10_Experiment_Juno_LTR_2-1A.fcs	896	21	2940	8850	0.897445	97.7099	75.0636
	72hrs_Jeko1_50U_IL2_don2_day_10_Experiment_Juno_LTR_2-1B.fcs	1044	40	3116	9605	0.974006	96.31	75.5051
	72hrs_Jeko1_50U_IL2_don2_day_10_Experiment_Juno_LTR_2-1C.fcs	1015	38	3381	9612	0.974716	96.3913	73.9783
	Sample:	dead cells	live cells	dead cells	live cells
	72hrs_Jeko1_50U_IL2_don2_day_10_Experiment_Juno_TCRA_1-1A.fcs	693	14	3632	10363	1.05087	98.0198	74.0479
	72hrs_Jeko1_50U_IL2_don2_day_10_Experiment_Juno_TCRA_1-1B.fcs	719	26	3805	10949	1.1103	96.5101	74.2104
	72hrs_Jeko1_50U_IL2_don2_day_10_Experiment_Juno_TCRA_1-1C.fcs	760	25	3664	10916	1.10695	96.8153	74.8697
	72hrs_Jeko1_50U_IL2_don2_day_10_Experiment_Juno_TCRA_1-2A.fcs	1184	46	3590	10488	1.06355	96.2602	74.4992
	72hrs_Jeko1_50U_IL2_don2_day_10_Experiment_Juno_TCRA_1-2B.fcs	1241	66	3752	10205	1.03485	94.9503	73.1174
	72hrs_Jeko1_50U_IL2_don2_day_10_Experiment_Juno_TCRA_1-2C.fcs	1261	40	3715	10143	1.02856	96.9254	73.1924
	72hrs_Jeko1_50U_IL2_don2_day_10_Experiment_Juno_TCRA_1-4A.fcs	2068	84	3395	9379	0.951088	96.0967	73.4226
	72hrs_Jeko1_50U_IL2_don2_day_10_Experiment_Juno_TCRA_1-4B.fcs	1900	74	3430	9294	0.942469	96.2513	73.0431
	72hrs_Jeko1_50U_IL2_don2_day_10_Experiment_Juno_TCRA_1-4C.fcs	2062	52	3362	9652	0.978772	97.5402	74.1663
	72hrs_Jeko1_50U_IL2_don2_day_10_Experiment_Juno_TCRA_2-1A.fcs	357	9	3576	10432	1.05787	97.541	74.4717
	72hrs_Jeko1_50U_IL2_don2_day_10_Experiment_Juno_TCRA_2-1B.fcs	480	10	3614	10608	1.07572	97.9592	74.5887
	72hrs_Jeko1_50U_IL2_don2_day_10_Experiment_Juno_TCRA_2-1C.fcs	560	13	3663	11002	1.11567	97.7312	75.0222
	Sample:	dead cells	live cells	dead cells	live cells
	72hrs_Jeko1_50U_IL2_don2_day_10_Experiment_Juno_TCRB_1-1A.fcs	601	24	3322	10922	1.10756	96.16	76.6779
	72hrs_Jeko1_50U_IL2_don2_day_10_Experiment_Juno_TCRB_1-1B.fcs	726	27	3560	11144	1.13007	96.4143	75.7889
	72hrs_Jeko1_50U_IL2_don2_day_10_Experiment_Juno_TCRB_1-1C.fcs	760	37	3657	11048	1.12034	95.3576	75.1309
	72hrs_Jeko1_50U_IL2_don2_day_10_Experiment_Juno_TCRB_1-2A.fcs	1206	60	3851	10378	1.05239	95.2607	72.9356
	72hrs_Jeko1_50U_IL2_don2_day_10_Experiment_Juno_TCRB_1-2B.fcs	1296	51	3550	10295	1.04398	96.2138	74.359
	72hrs_Jeko1_50U_IL2_don2_day_10_Experiment_Juno_TCRB_1-2C.fcs	1371	32	3605	10360	1.05057	97.7192	74.1855
	72hrs_Jeko1_50U_IL2_don2_day_10_Experiment_Juno_TCRB_1-4A.fcs	2264	94	3325	9654	0.978975	96.0136	74.3817
	72hrs_Jeko1_50U_IL2_don2_day_10_Experiment_Juno_TCRB_1-4B.fcs	2192	79	3276	9661	0.979685	96.5214	74.6773
	72hrs_Jeko1_50U_IL2_don2_day_10_Experiment_Juno_TCRB_1-4C.fcs	2037	77	3198	10217	1.03607	96.3576	76.161
	72hrs_Jeko1_50U_IL2_don2_day_10_Experiment_Juno_TCRB_2-1A.fcs	306	11	3147	11049	1.12044	96.53	77.8318
	72hrs_Jeko1_50U_IL2_don2_day_10_Experiment_Juno_TCRB_2-1B.fcs	478	18	3557	10721	1.08718	96.371	75.0875
	72hrs_Jeko1_50U_IL2_don2_day_10_Experiment_Juno_TCRB_2-1C.fcs	464	12	3748	10931	1.10847	97.479	74.4669
