# Supplementary figures and images for: Robust T cell activation requires an eIF3-driven burst in T cell receptor translation
Source: eLife journal article supplement (doi:10.7554/elife.74272), 2021-12-31

Figure 6–figure supplement 5

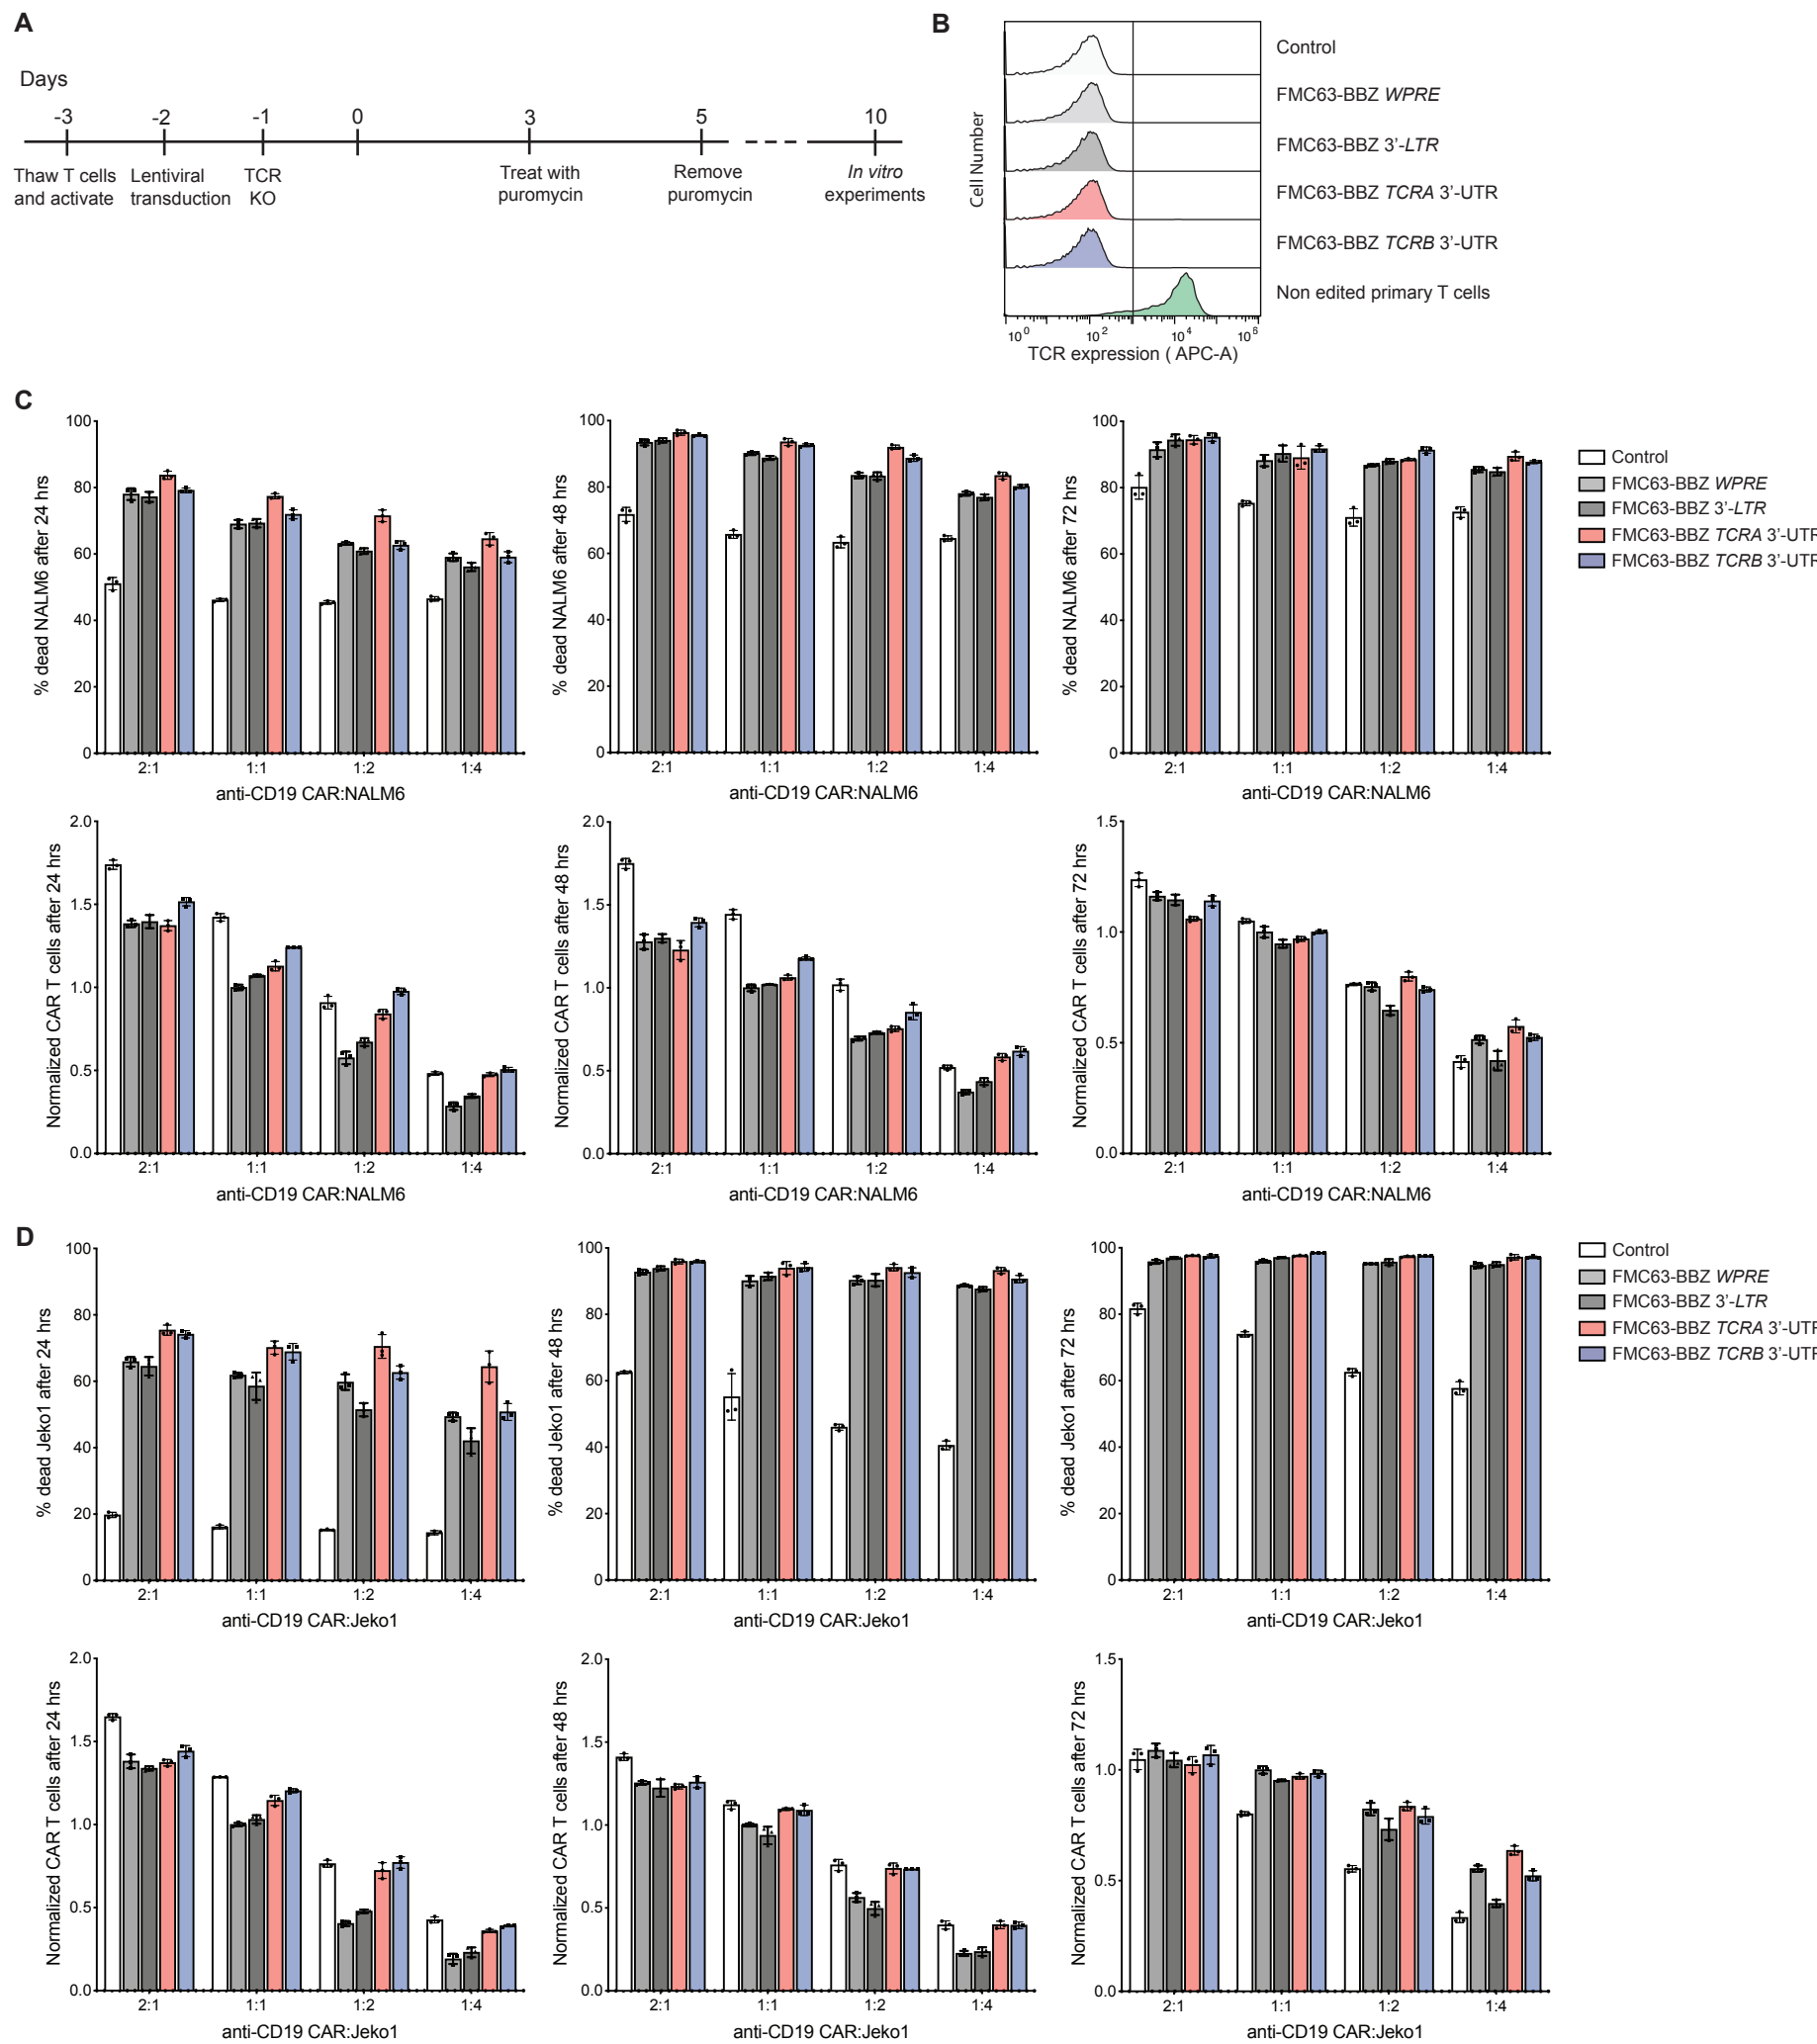

Supplement: supp [file elife-74272-supp-v1.zip]

Figure 1\_S1

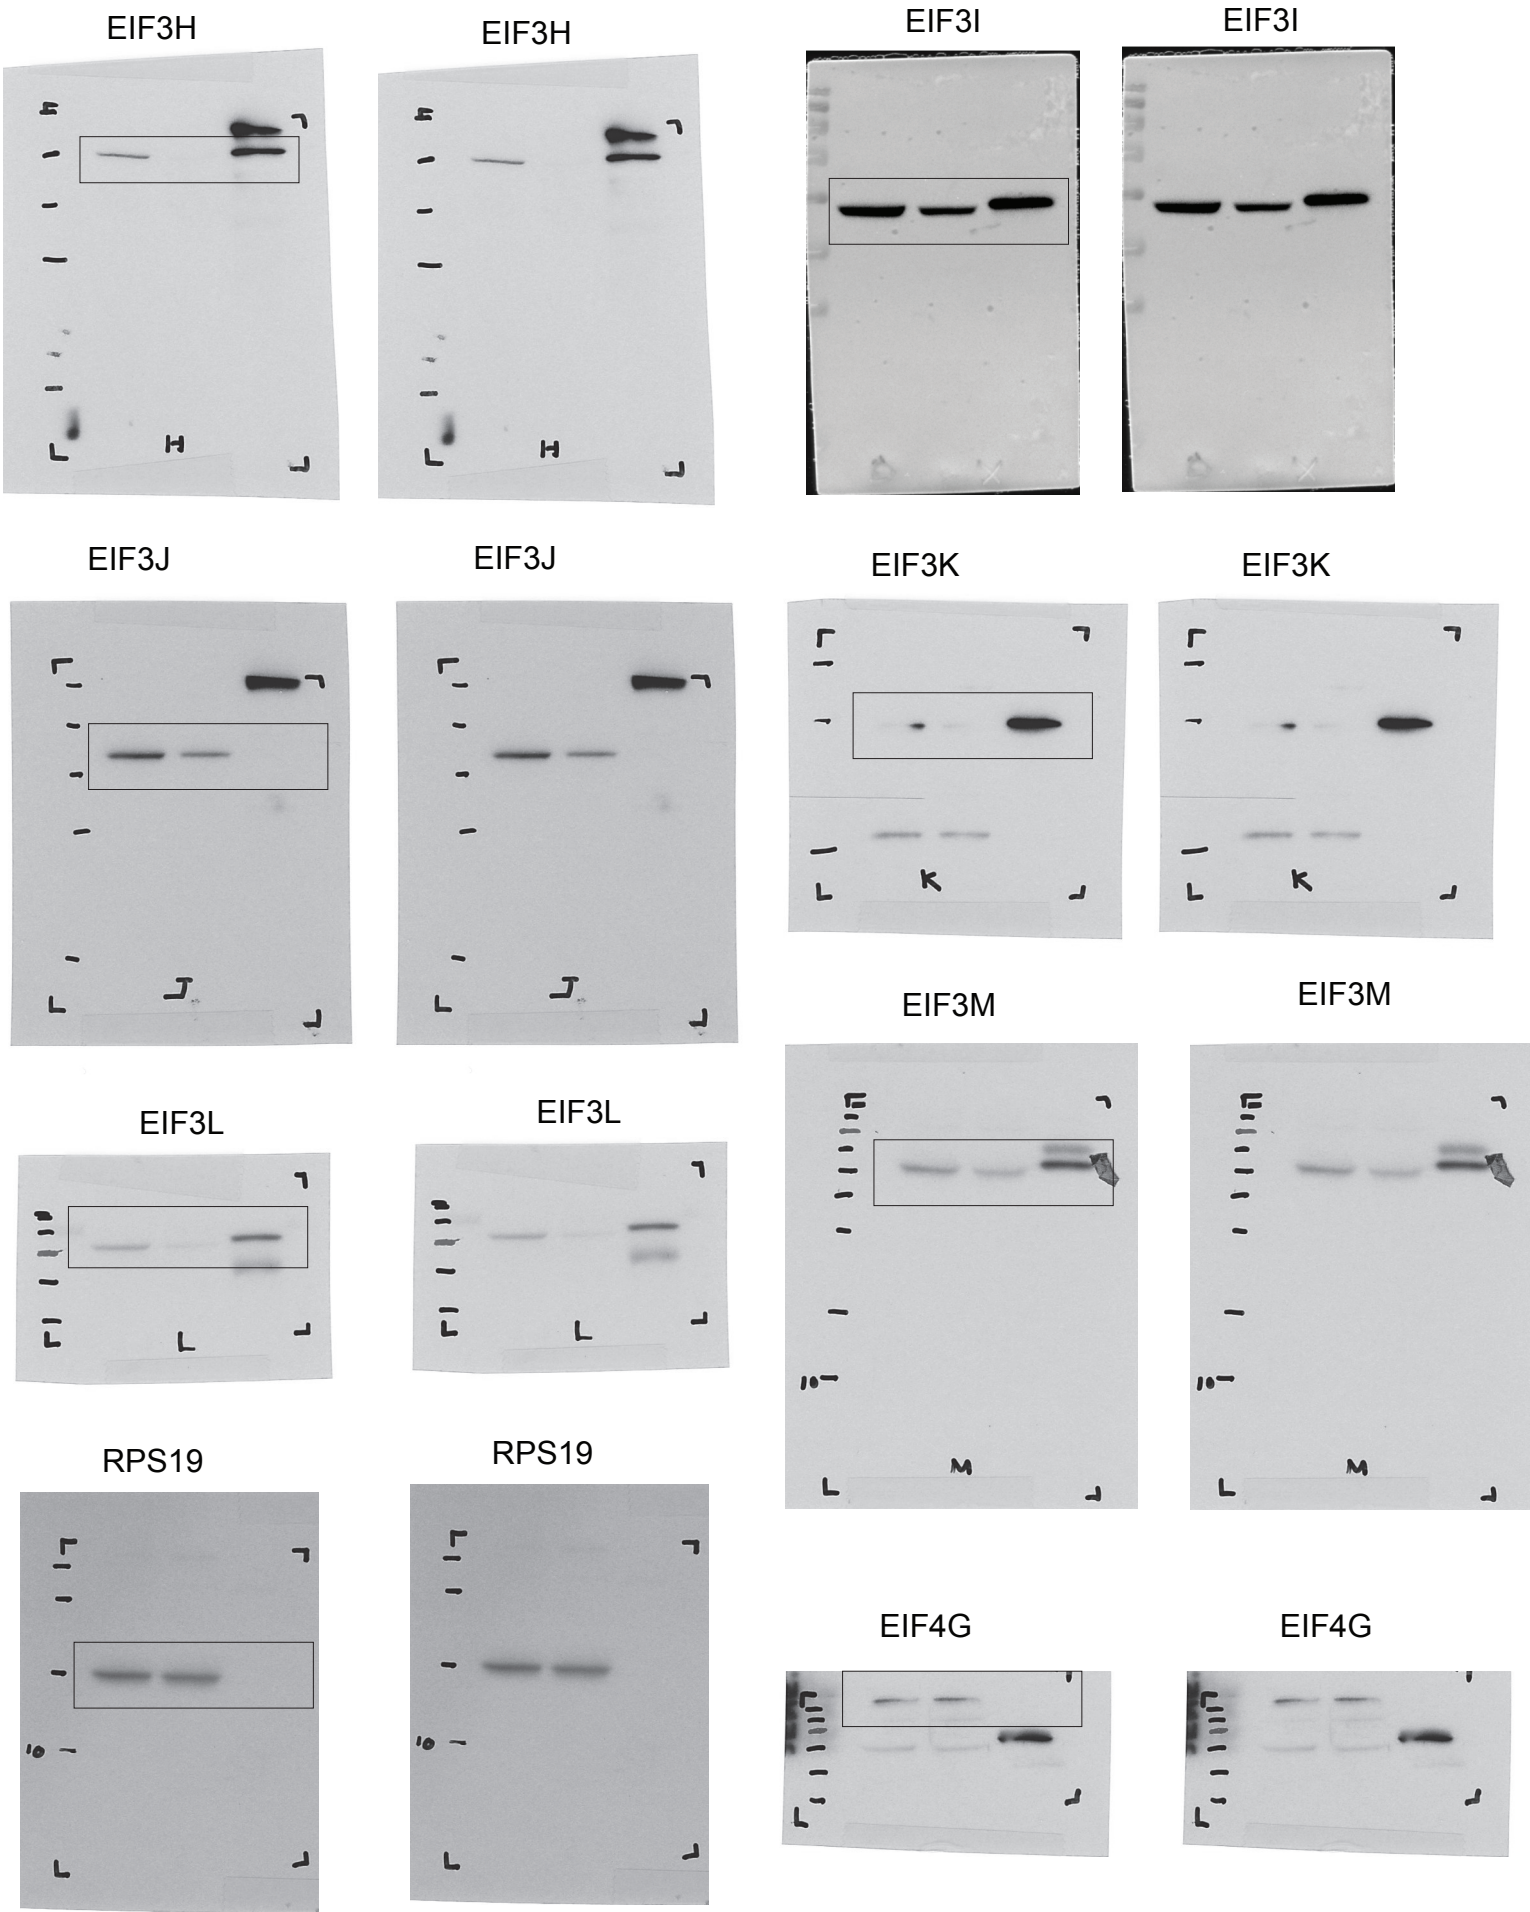

Supplement: supp [file elife-74272-supp-v1.zip]

Figure 1\_S1

EIF3B

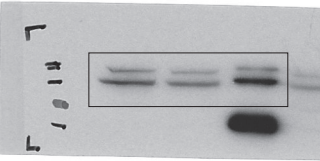

EIF3B

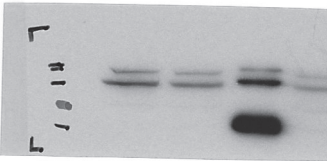

EIF3A

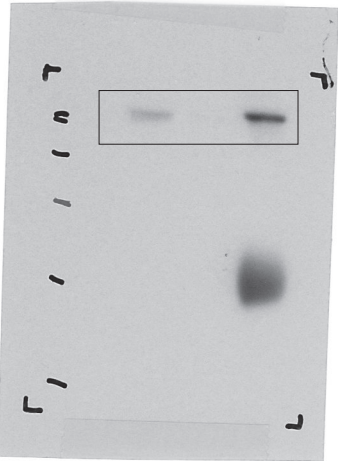

EIF3A

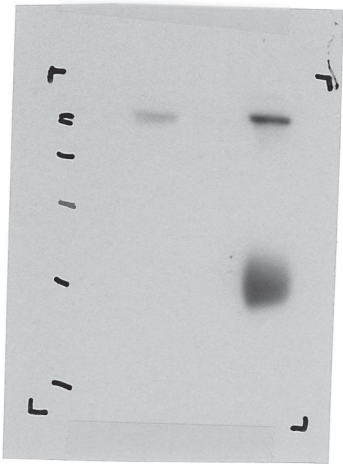

EIF3C

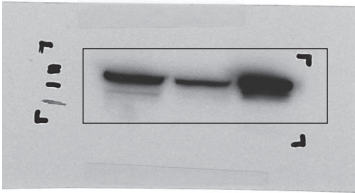

EIF3C

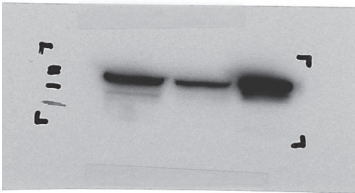

EIF3D

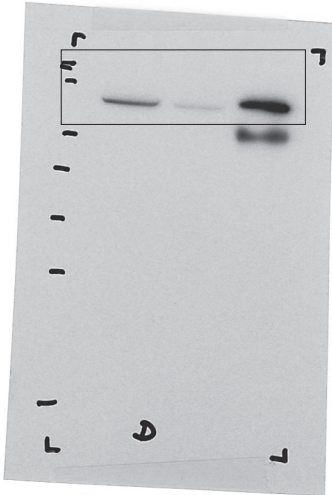

EIF3D

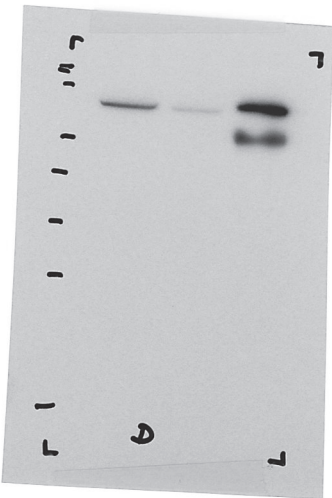

EIF3E

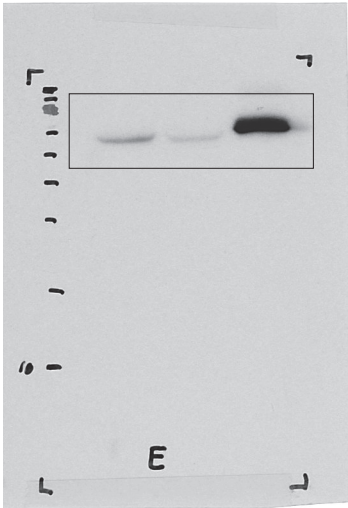

EIF3E

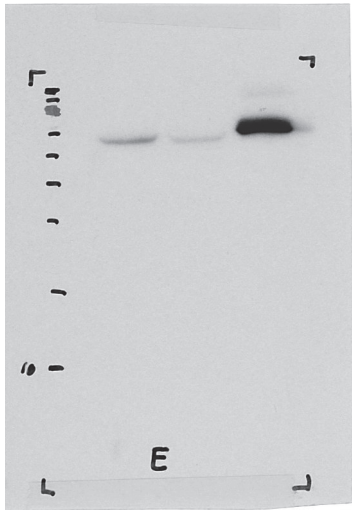

EIF3F

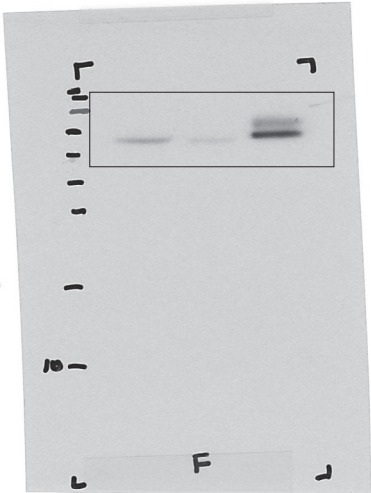

EIF3F

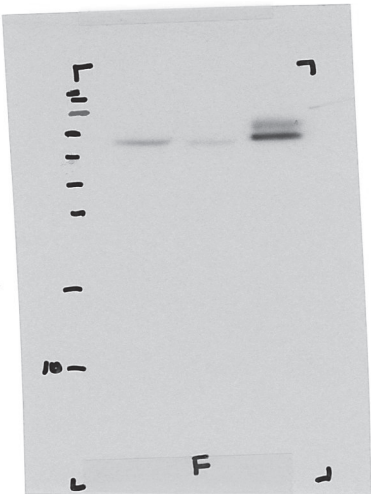

EIF3G

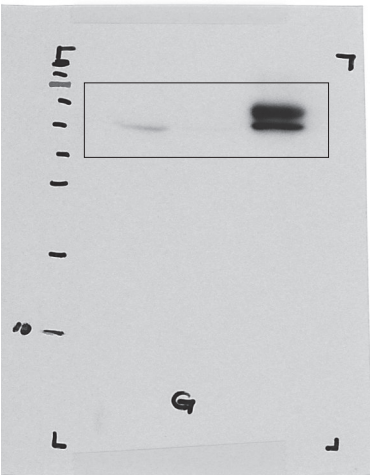

EIF3G

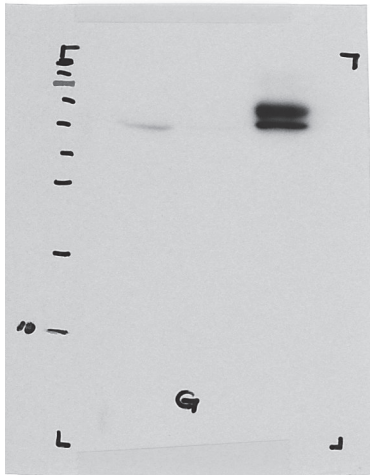

Supplement: supp [file elife-74272-supp-v1.zip]

Figure 4—figure supplement 1

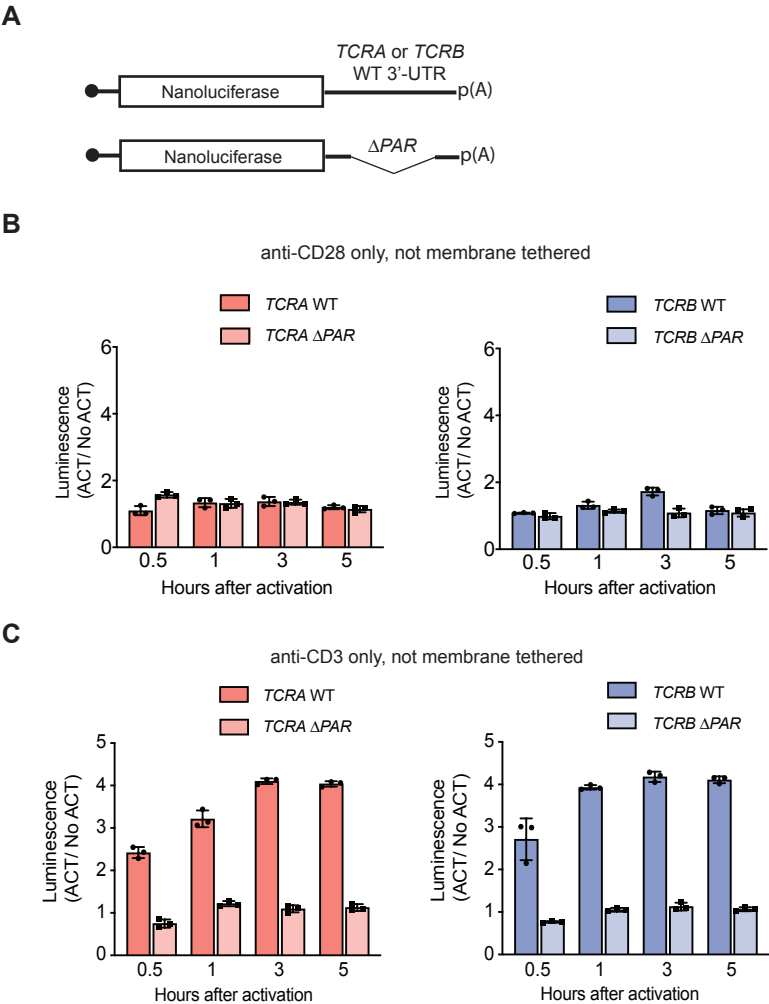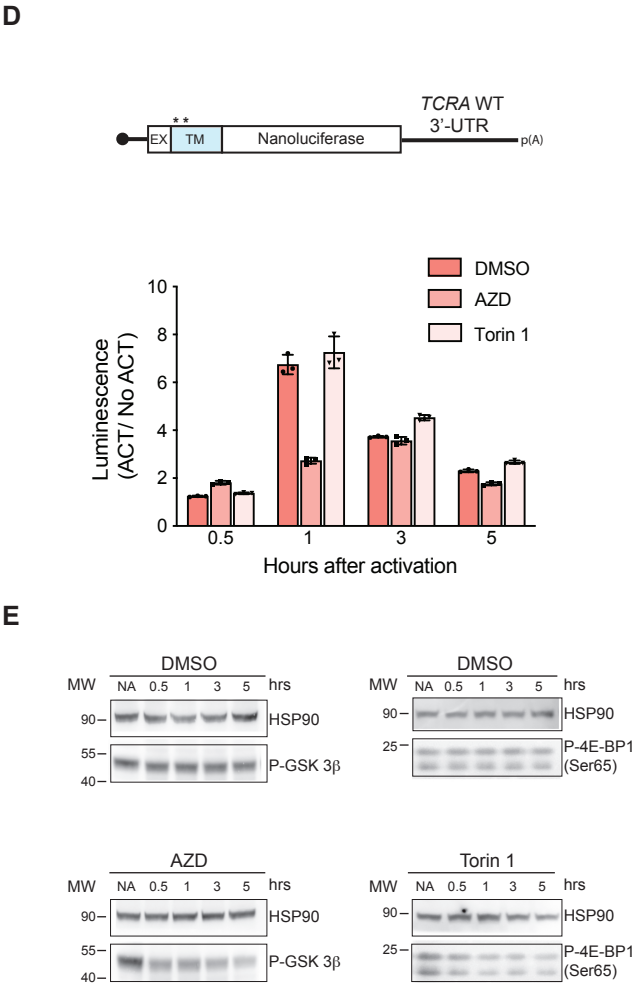

Supplement: supp [file elife-74272-supp-v1.zip]

Figure 6-figure supplement 1

**A**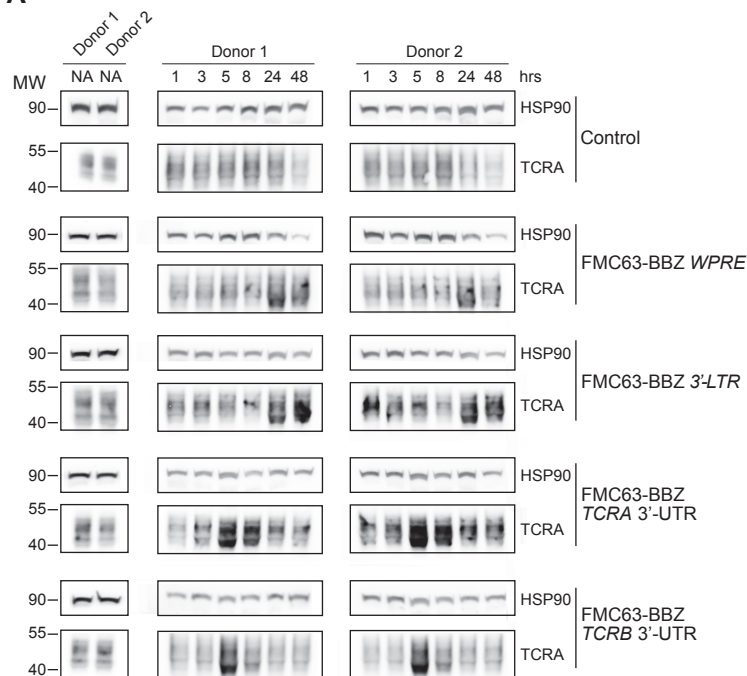**B**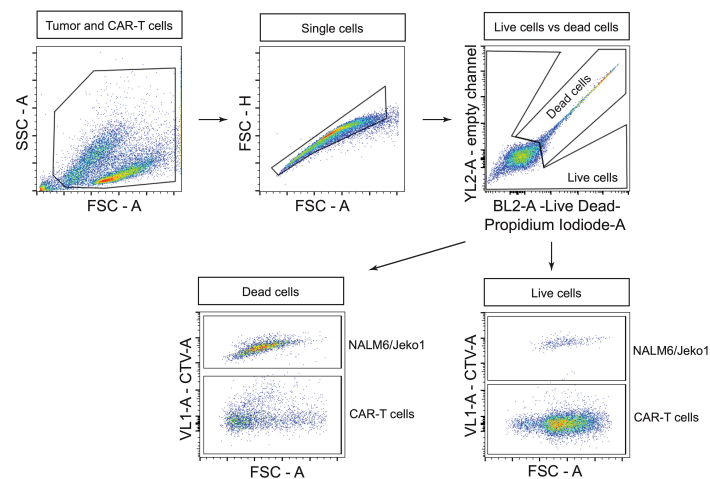**C**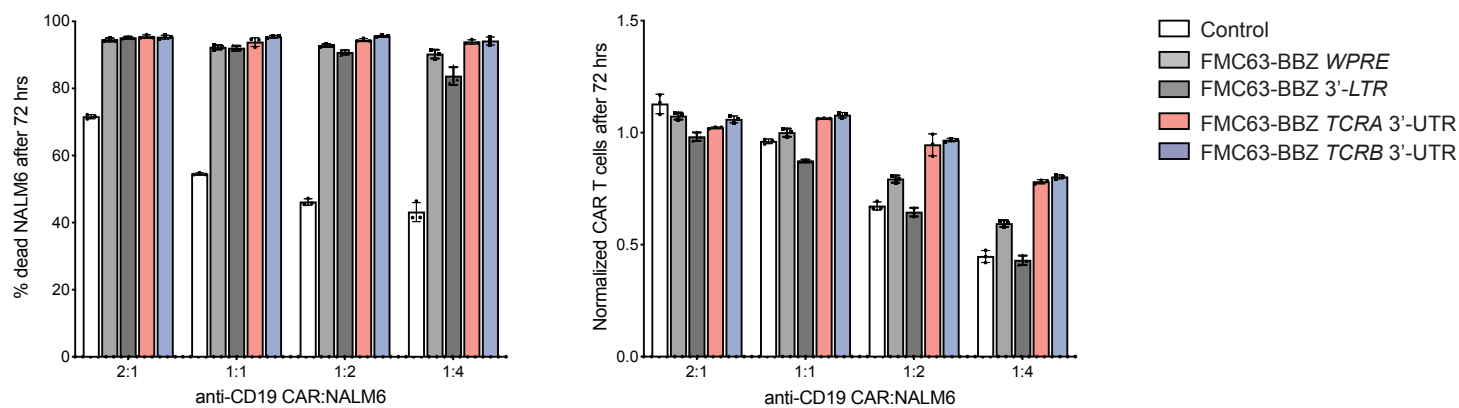**D**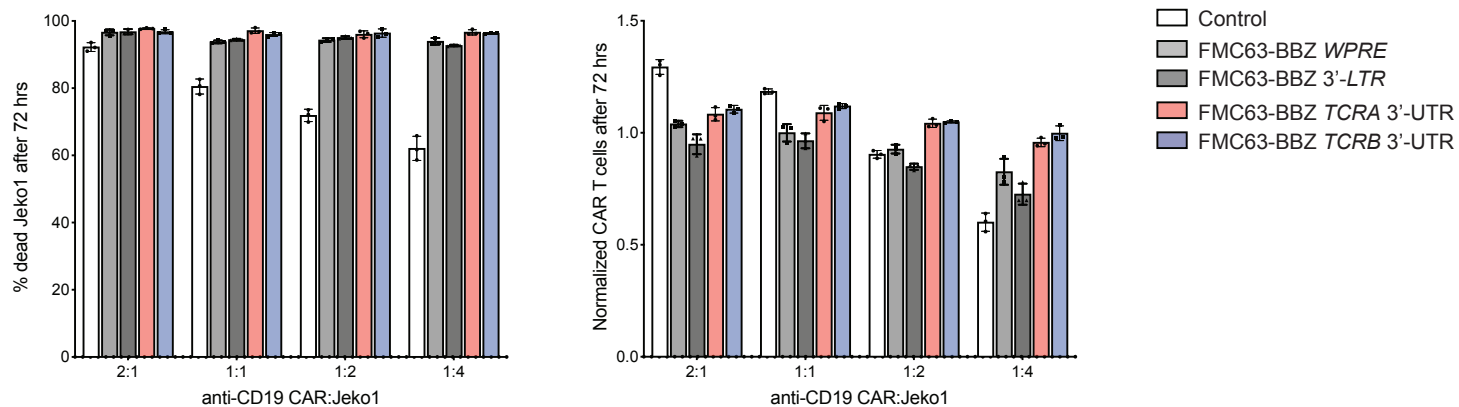

Supplement: supp [file elife-74272-supp-v1.zip]

Figure\_5\_S3

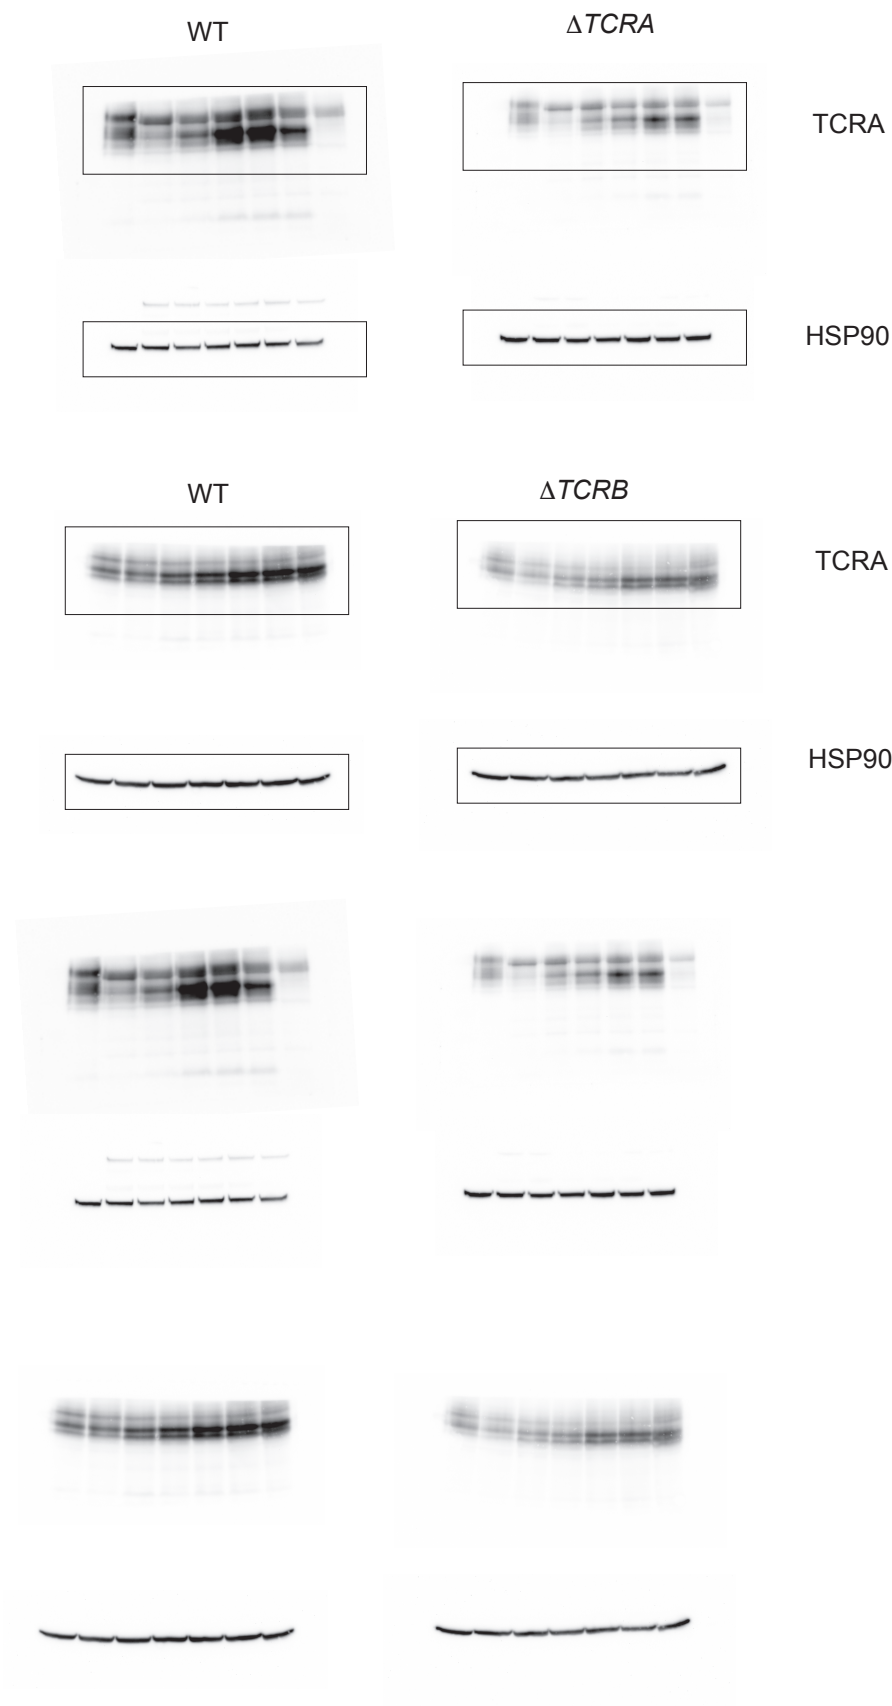

Supplement: supp [file elife-74272-supp-v1.zip]

Figure 1—figure supplement 1

**A**

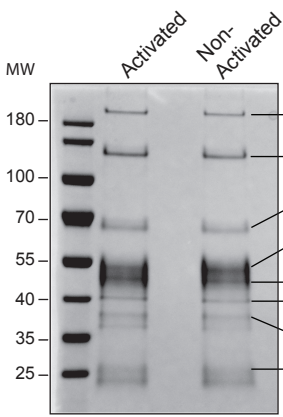

**B**

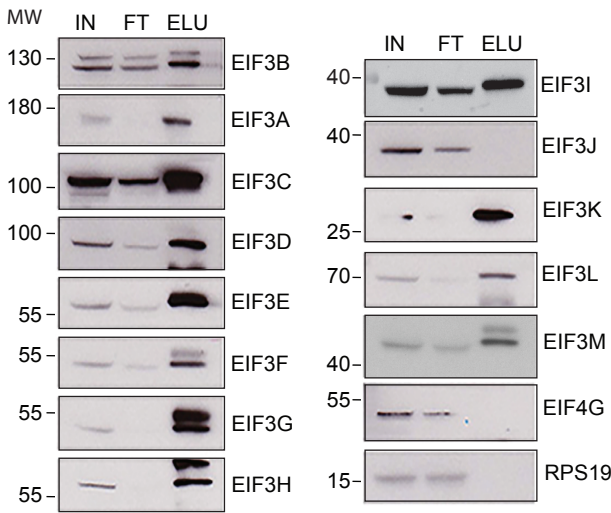

**C**

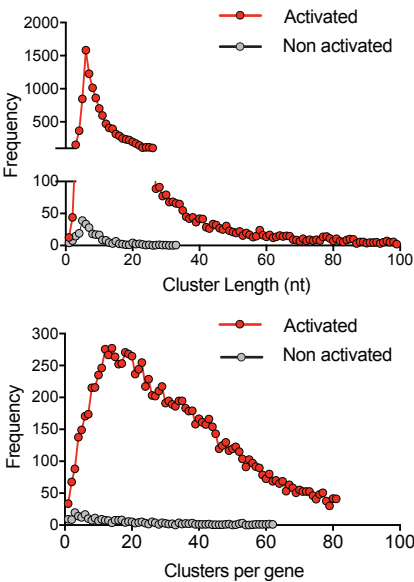

**D**

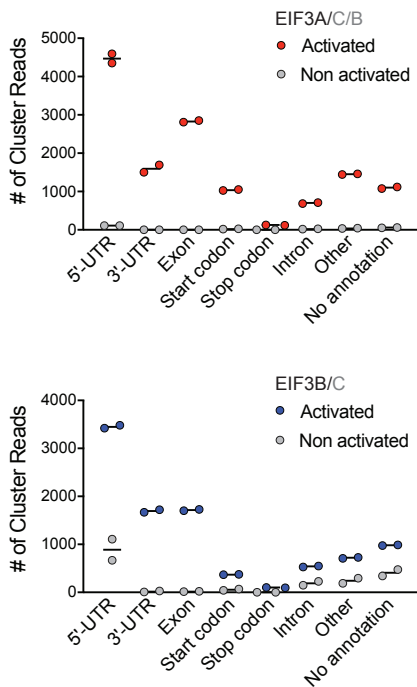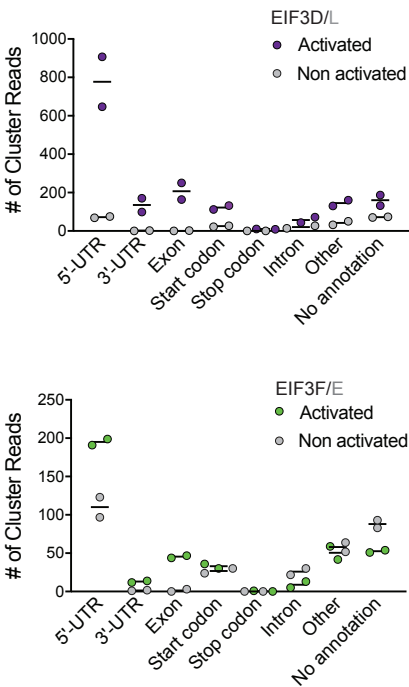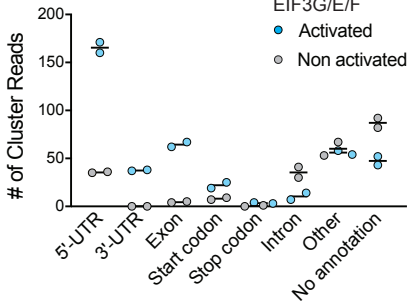

**E**

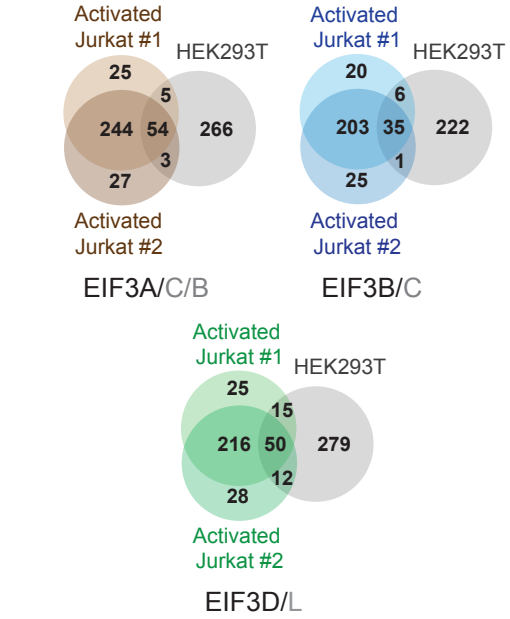

**F**

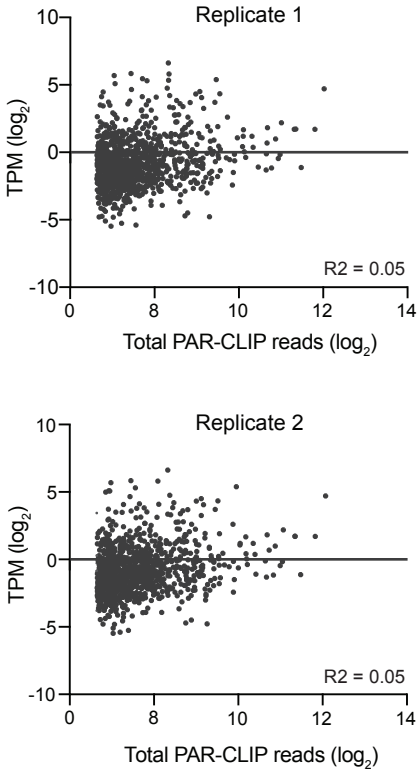

**G**

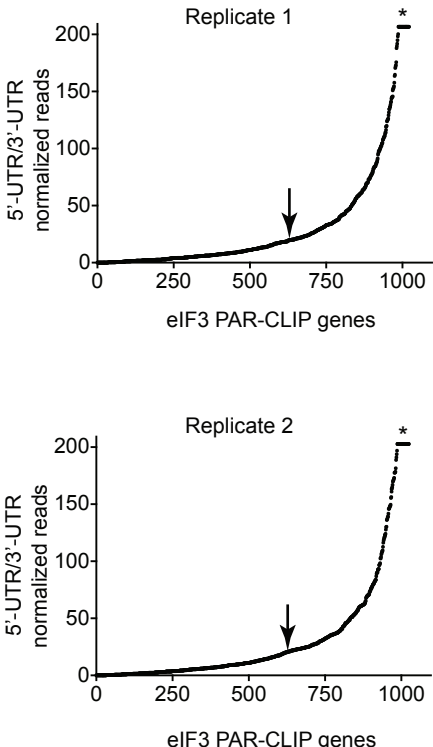

**H**

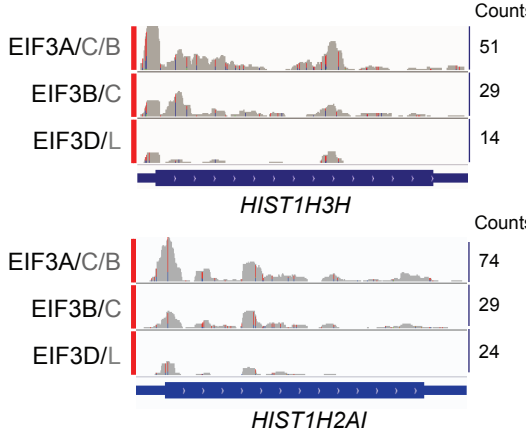

Supplement: supp [file elife-74272-supp-v1.zip]

Figure 5 A

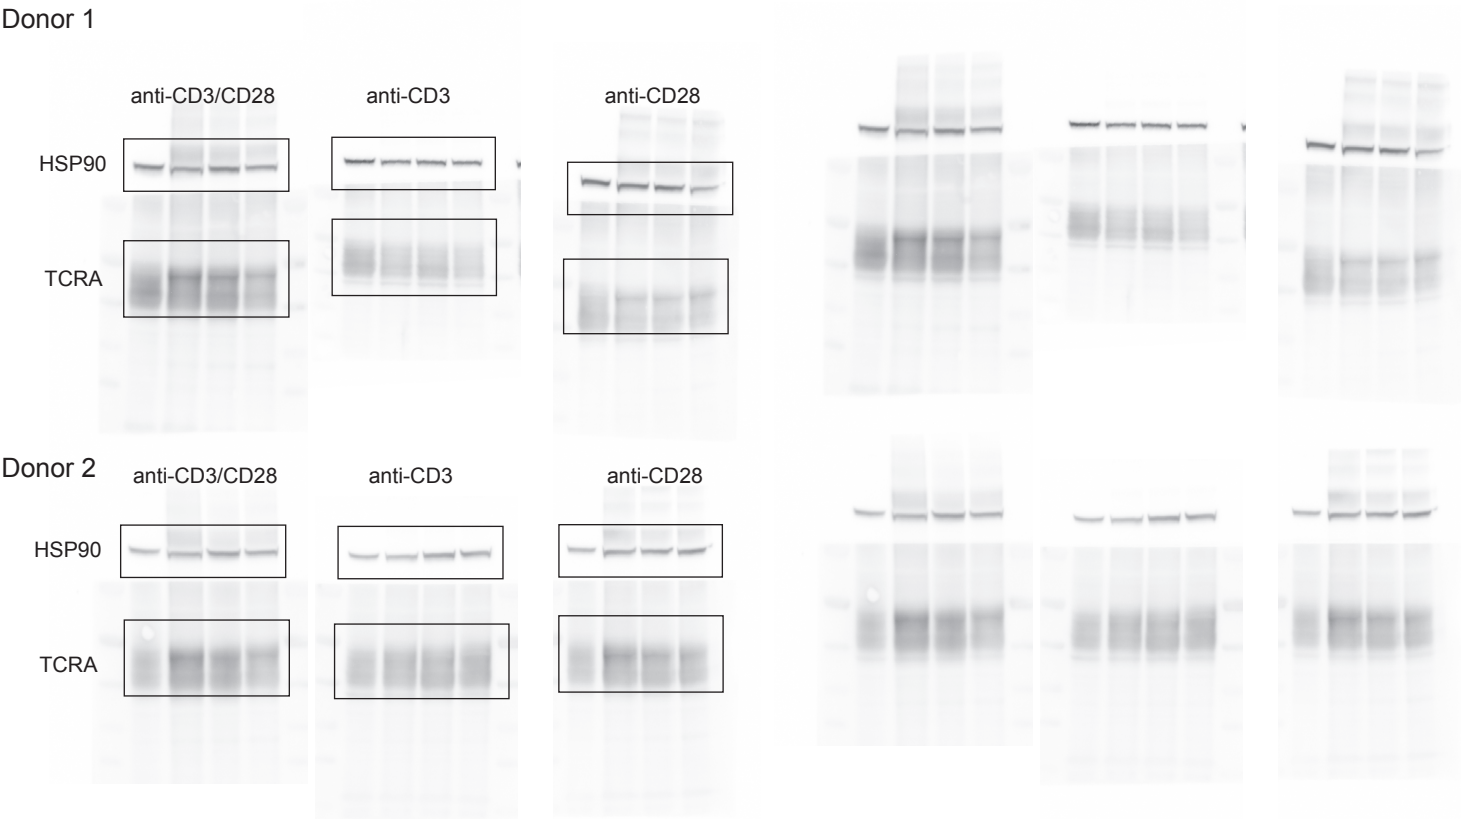

Figure 5 B

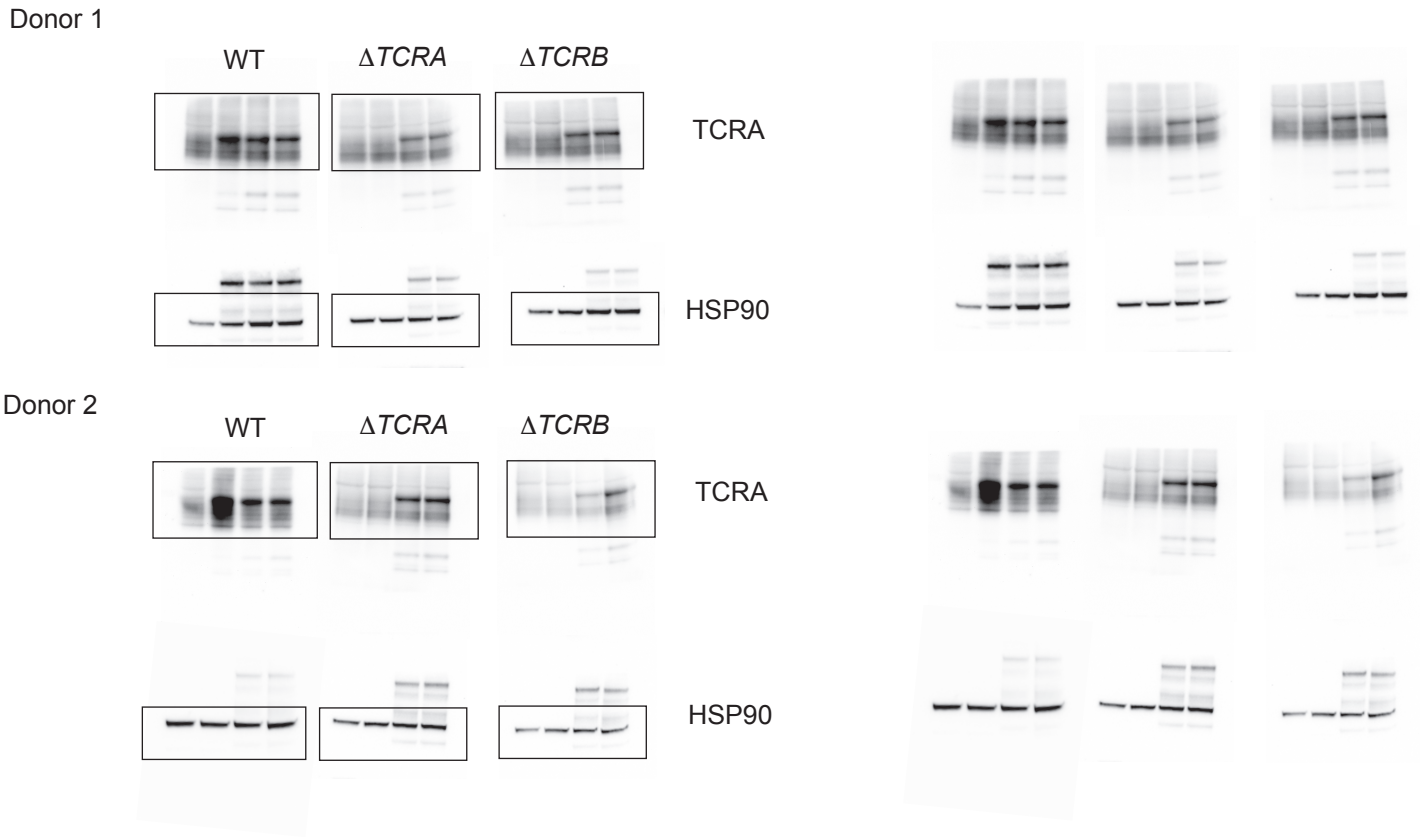

Supplement: supp [file elife-74272-supp-v1.zip]

Figure\_4

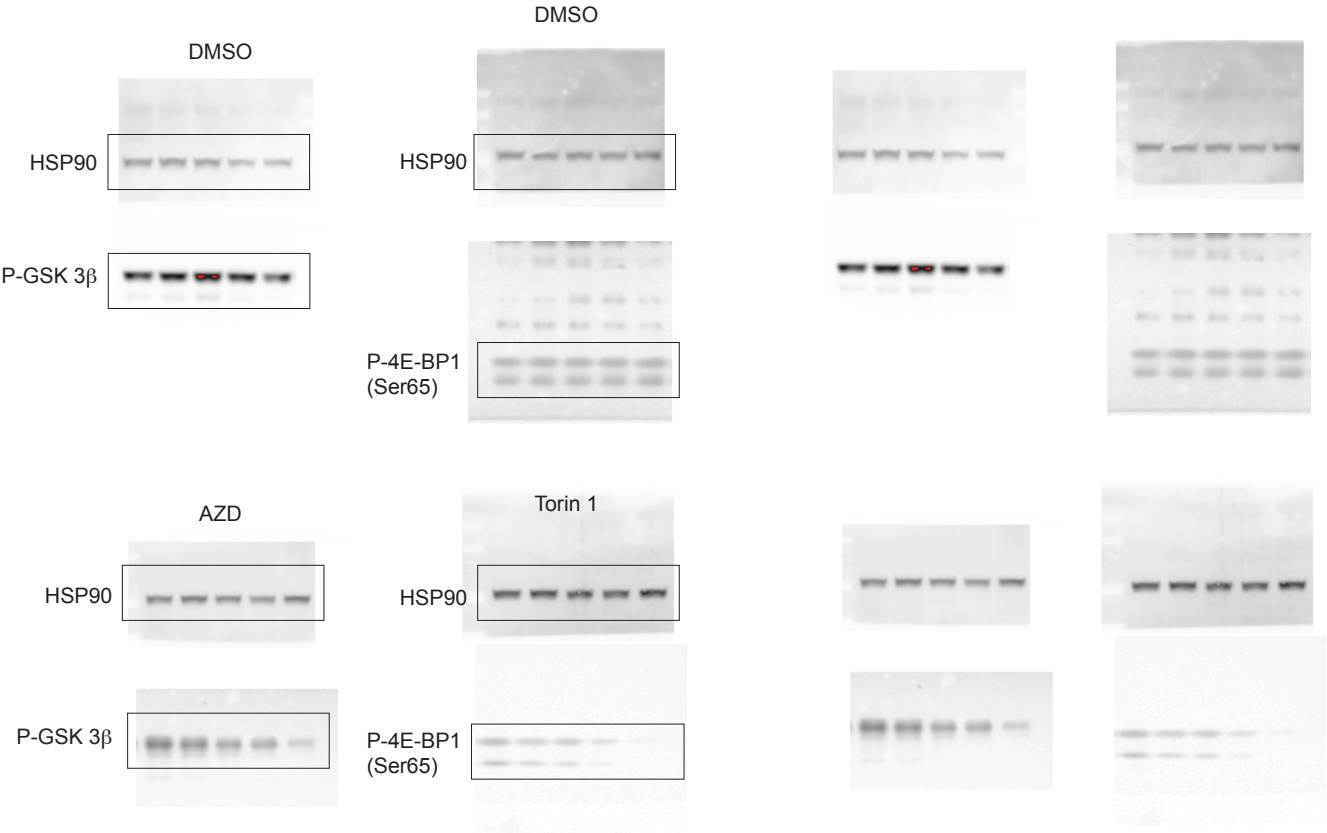

Supplement: supp [file elife-74272-supp-v1.zip]

Figure 6—figure supplement 2

A

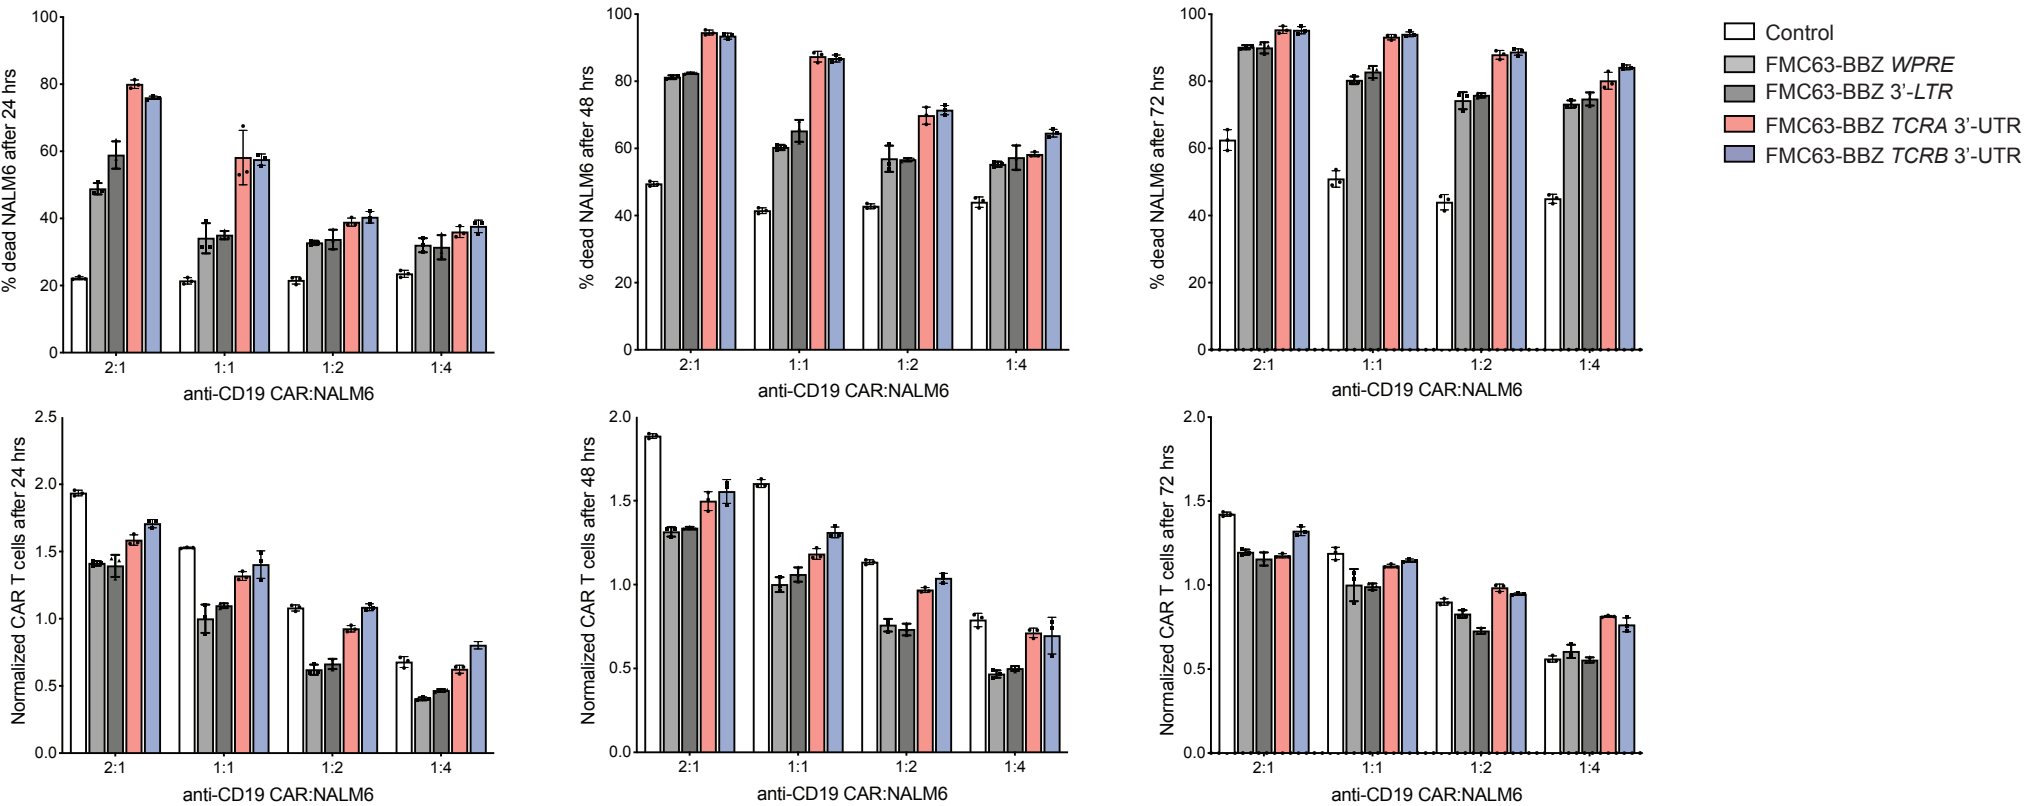

B

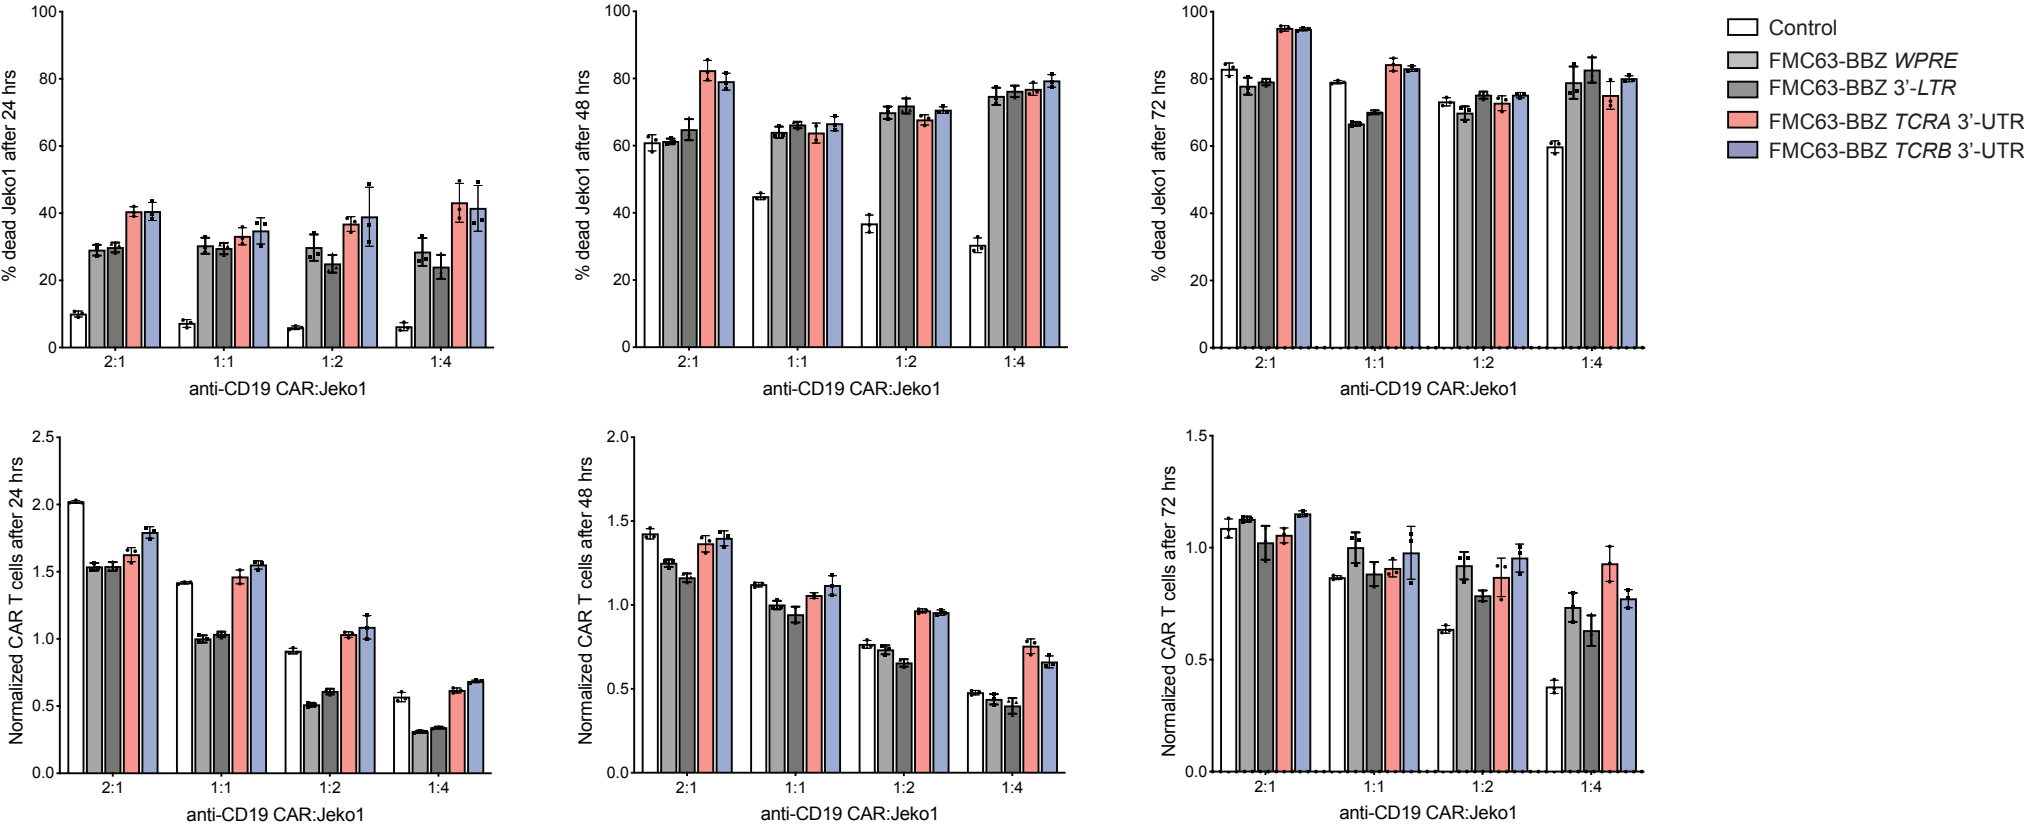

Supplement: supp [file elife-74272-supp-v1.zip]

Figure 6—figure supplement 4

A

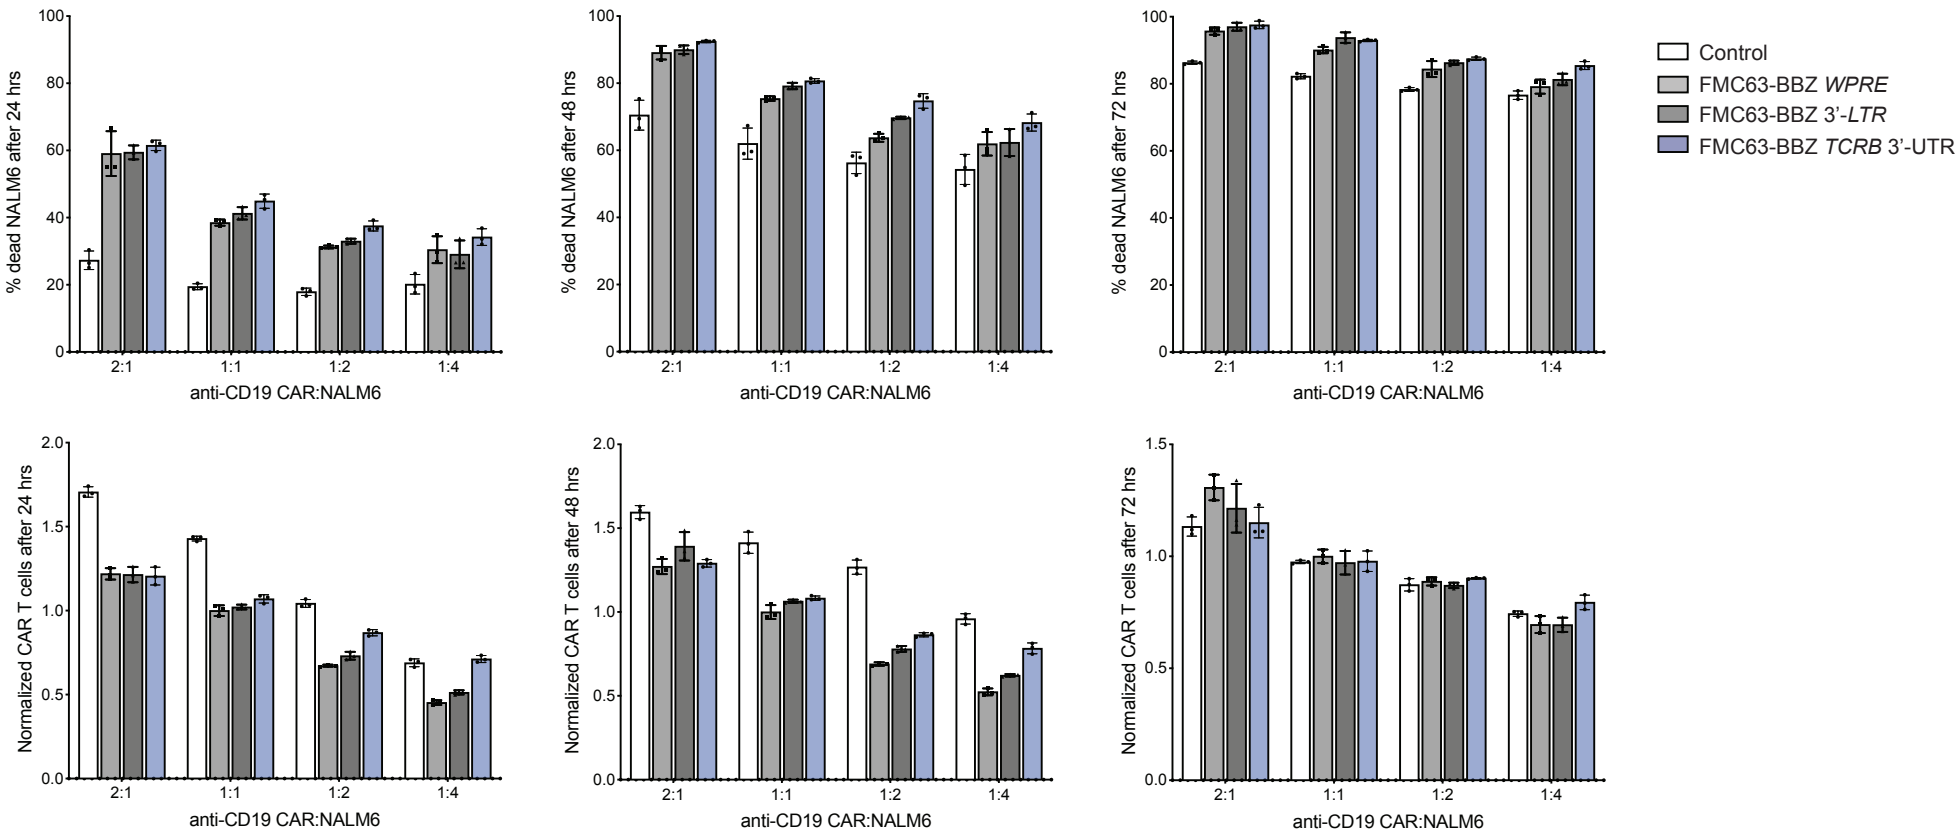

B

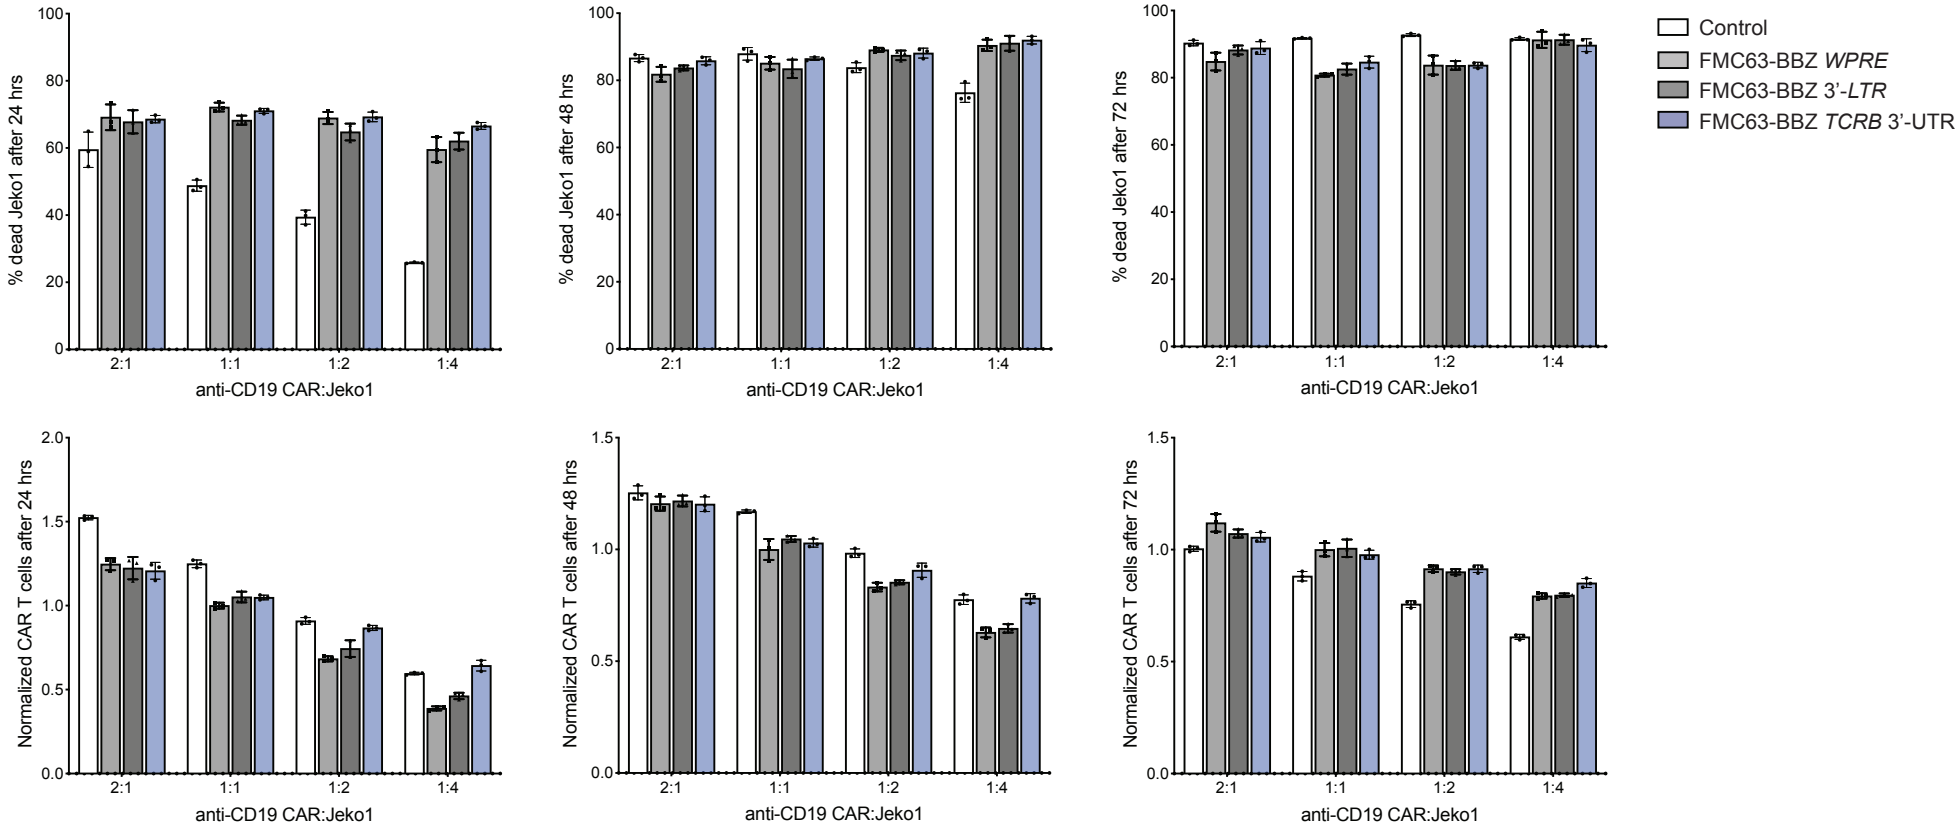

Supplement: supp [file elife-74272-supp-v1.zip]

Figure 6–figure supplement 6

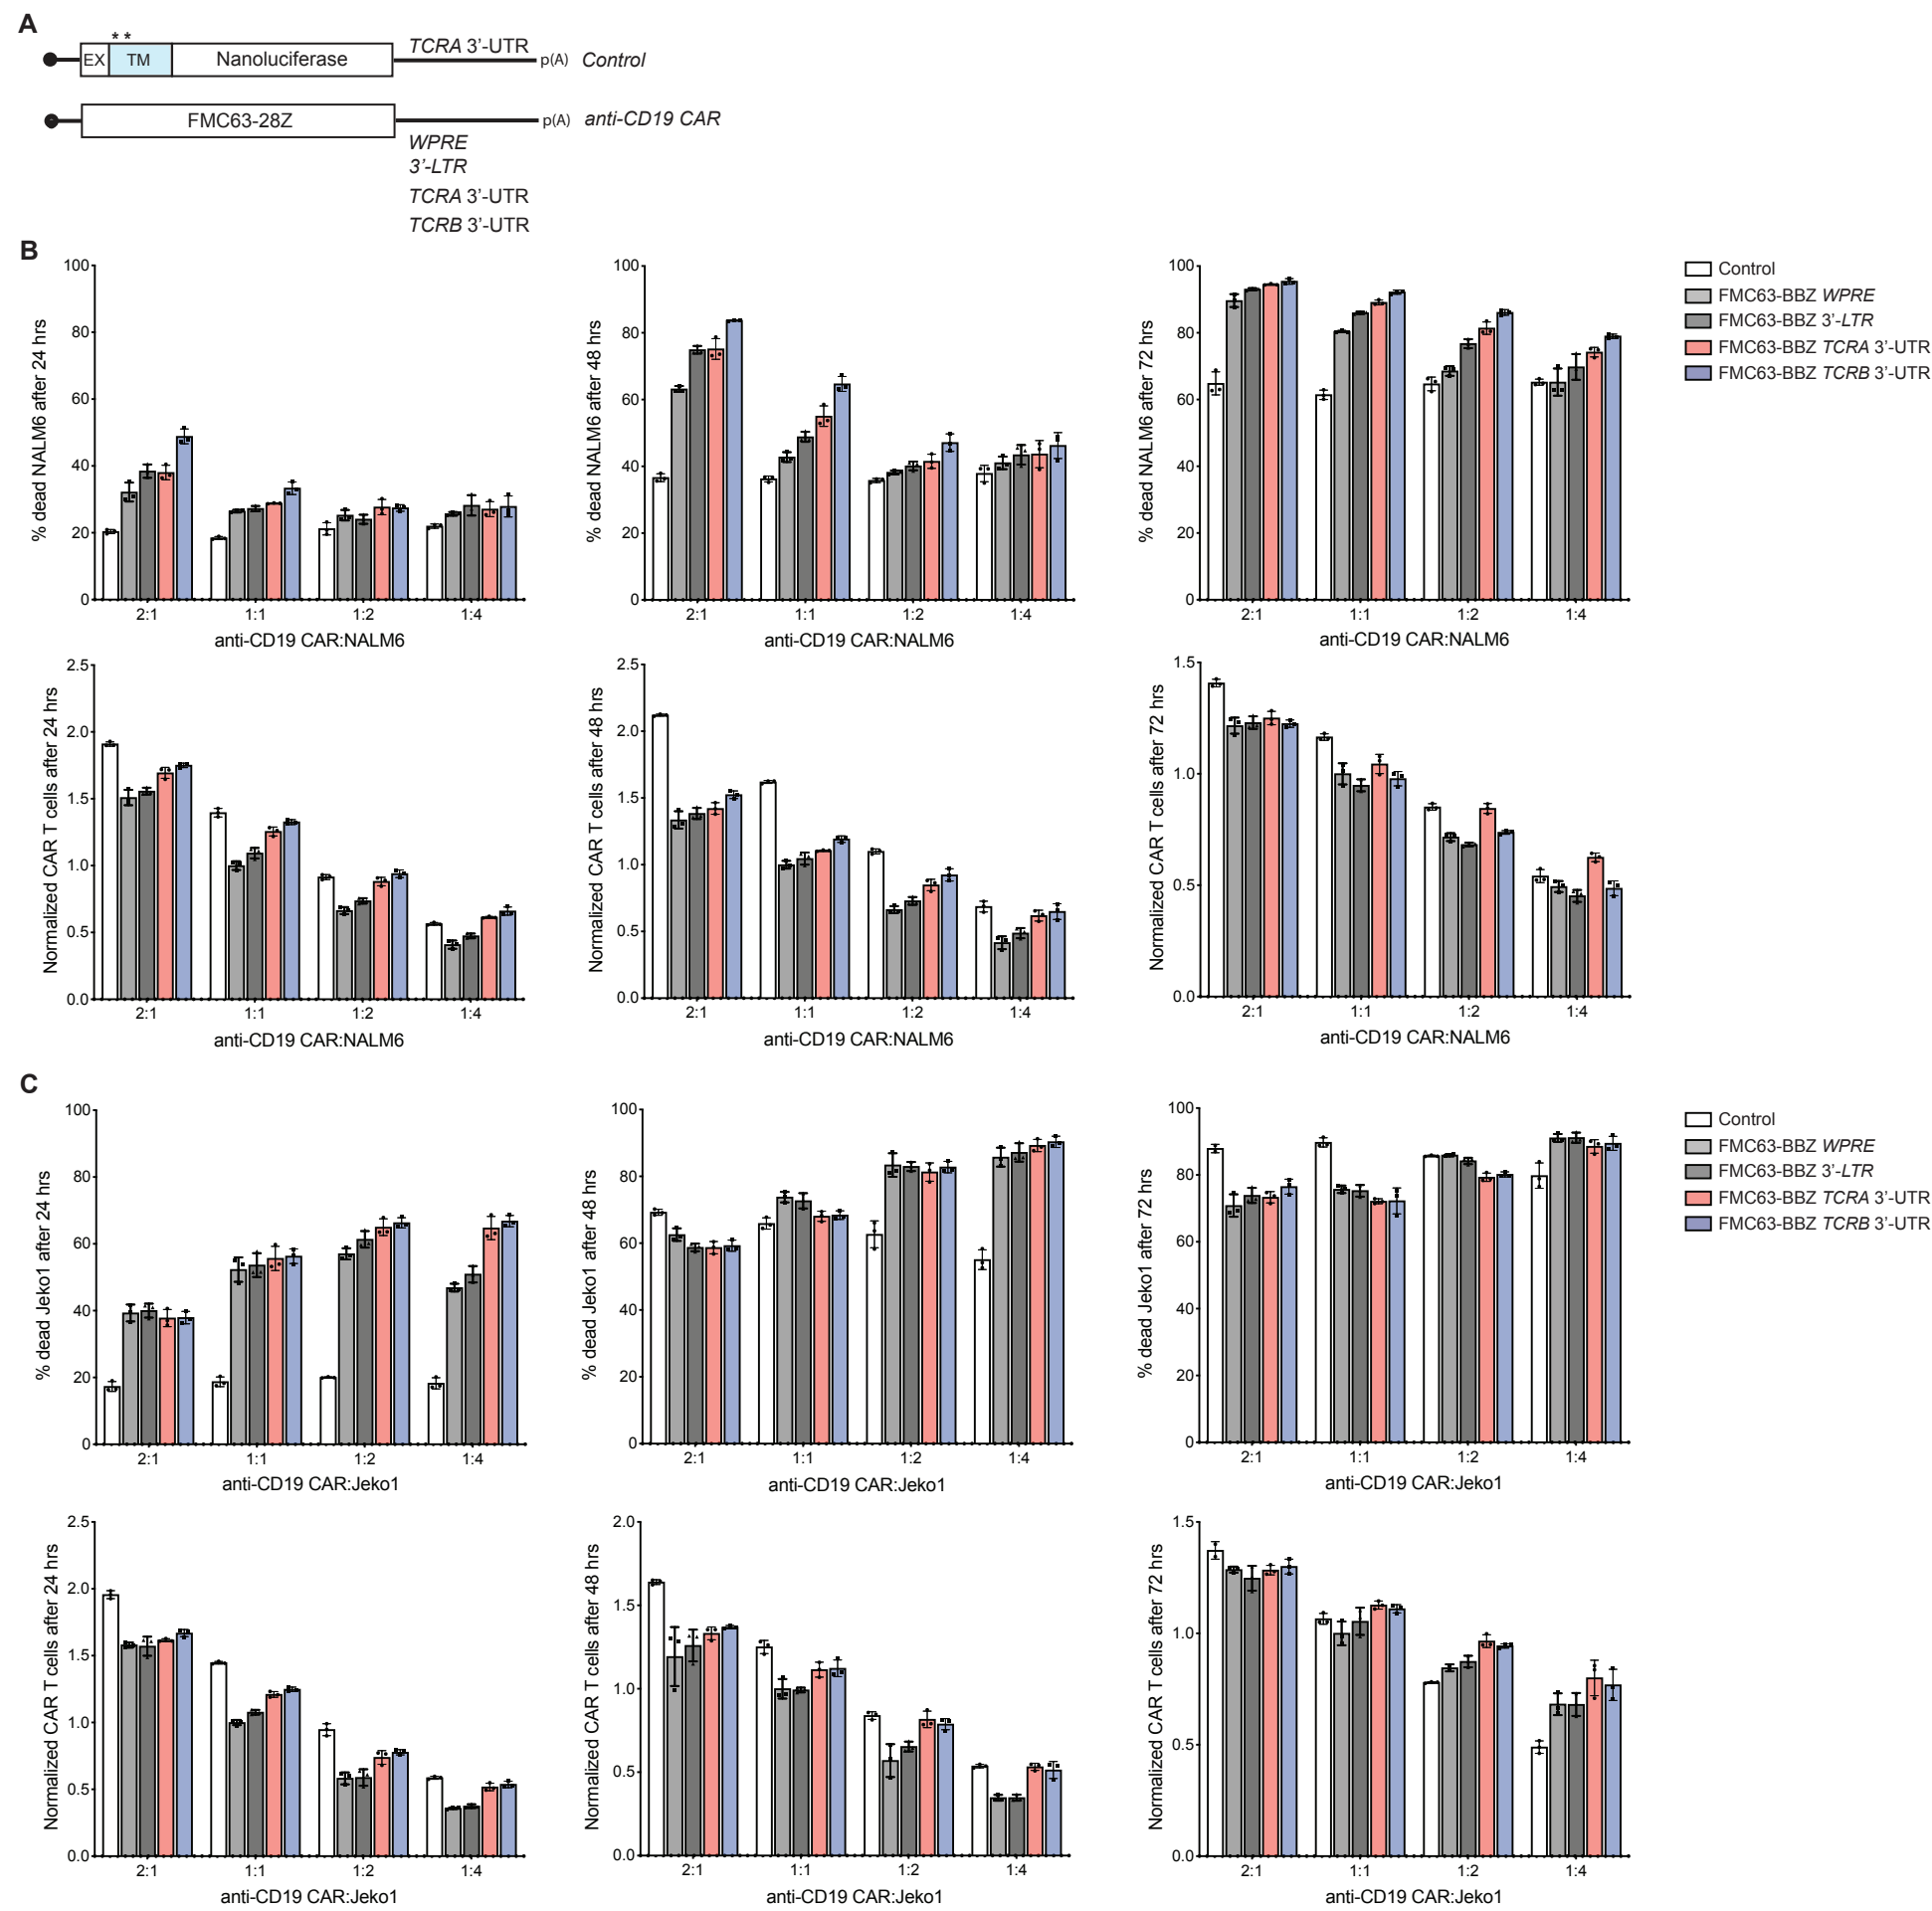

Supplement: supp [file elife-74272-supp-v1.zip]

Figure\_6\_S1

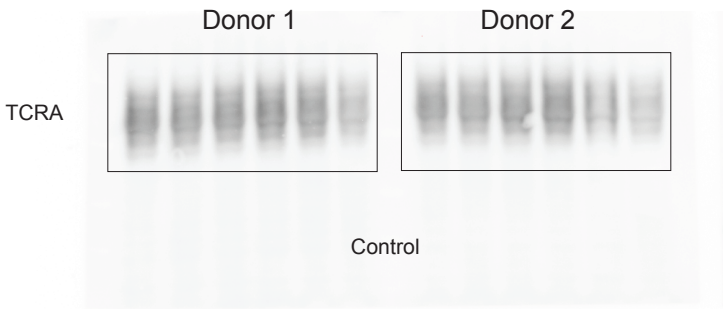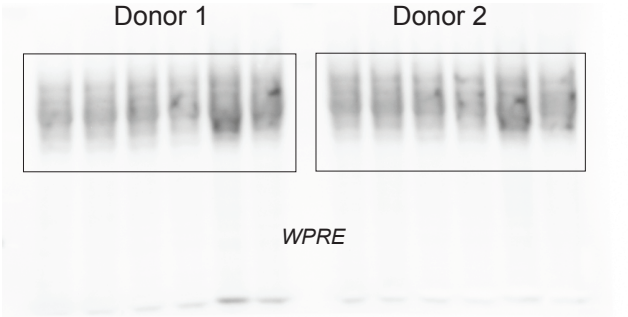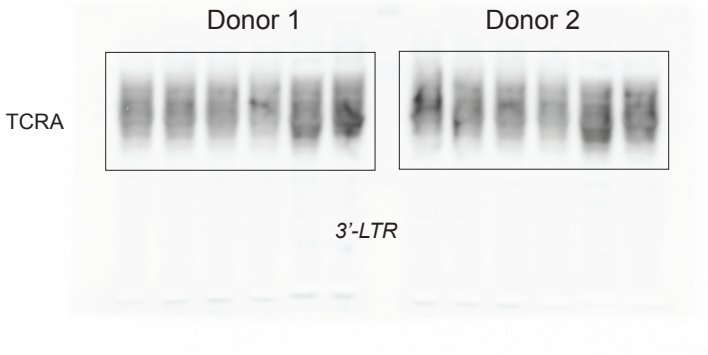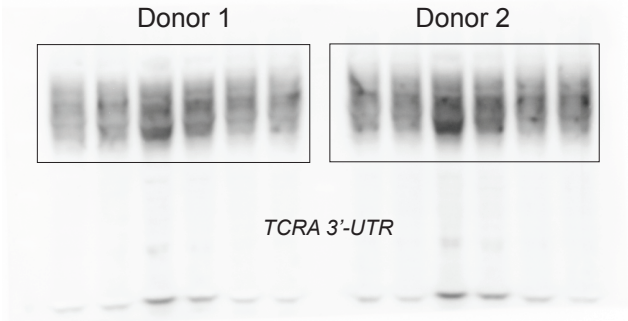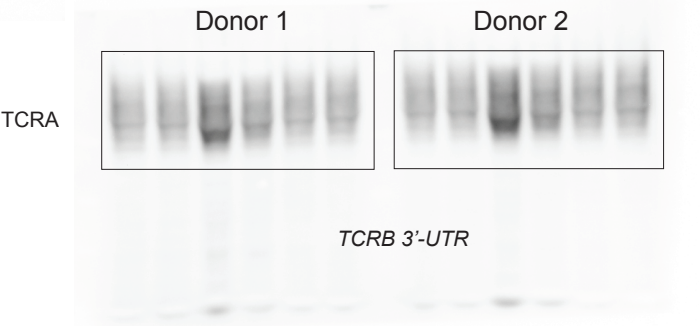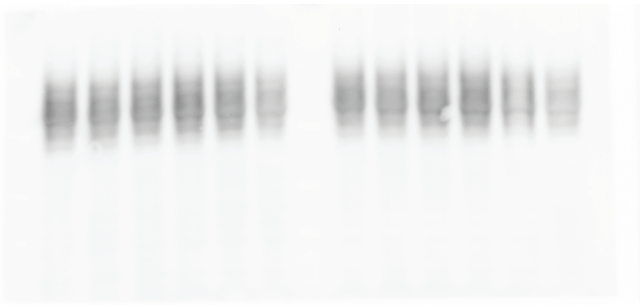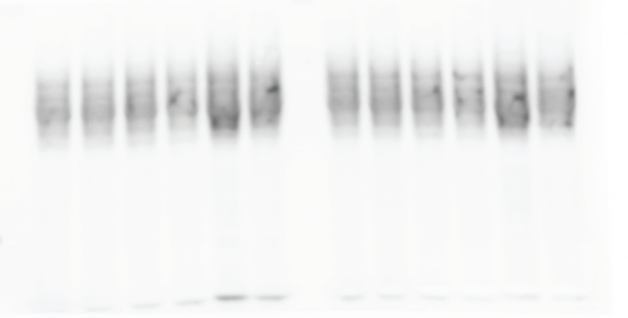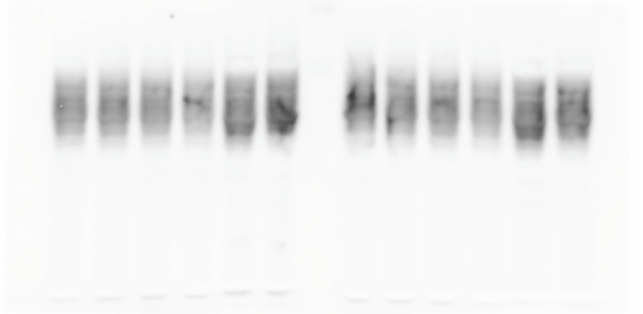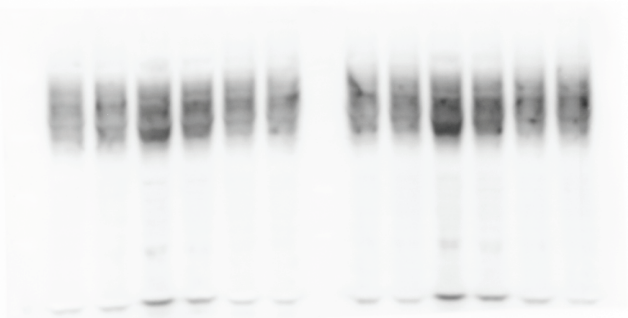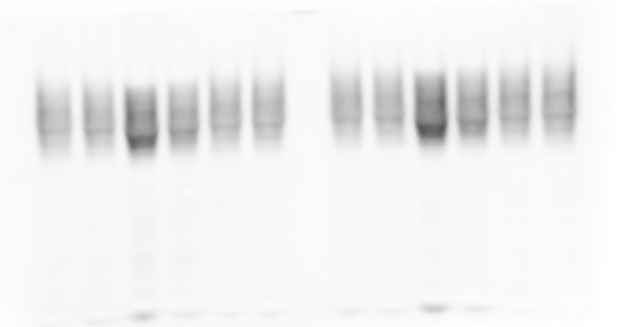

Supplement: supp [file elife-74272-supp-v1.zip]

Figure 1B

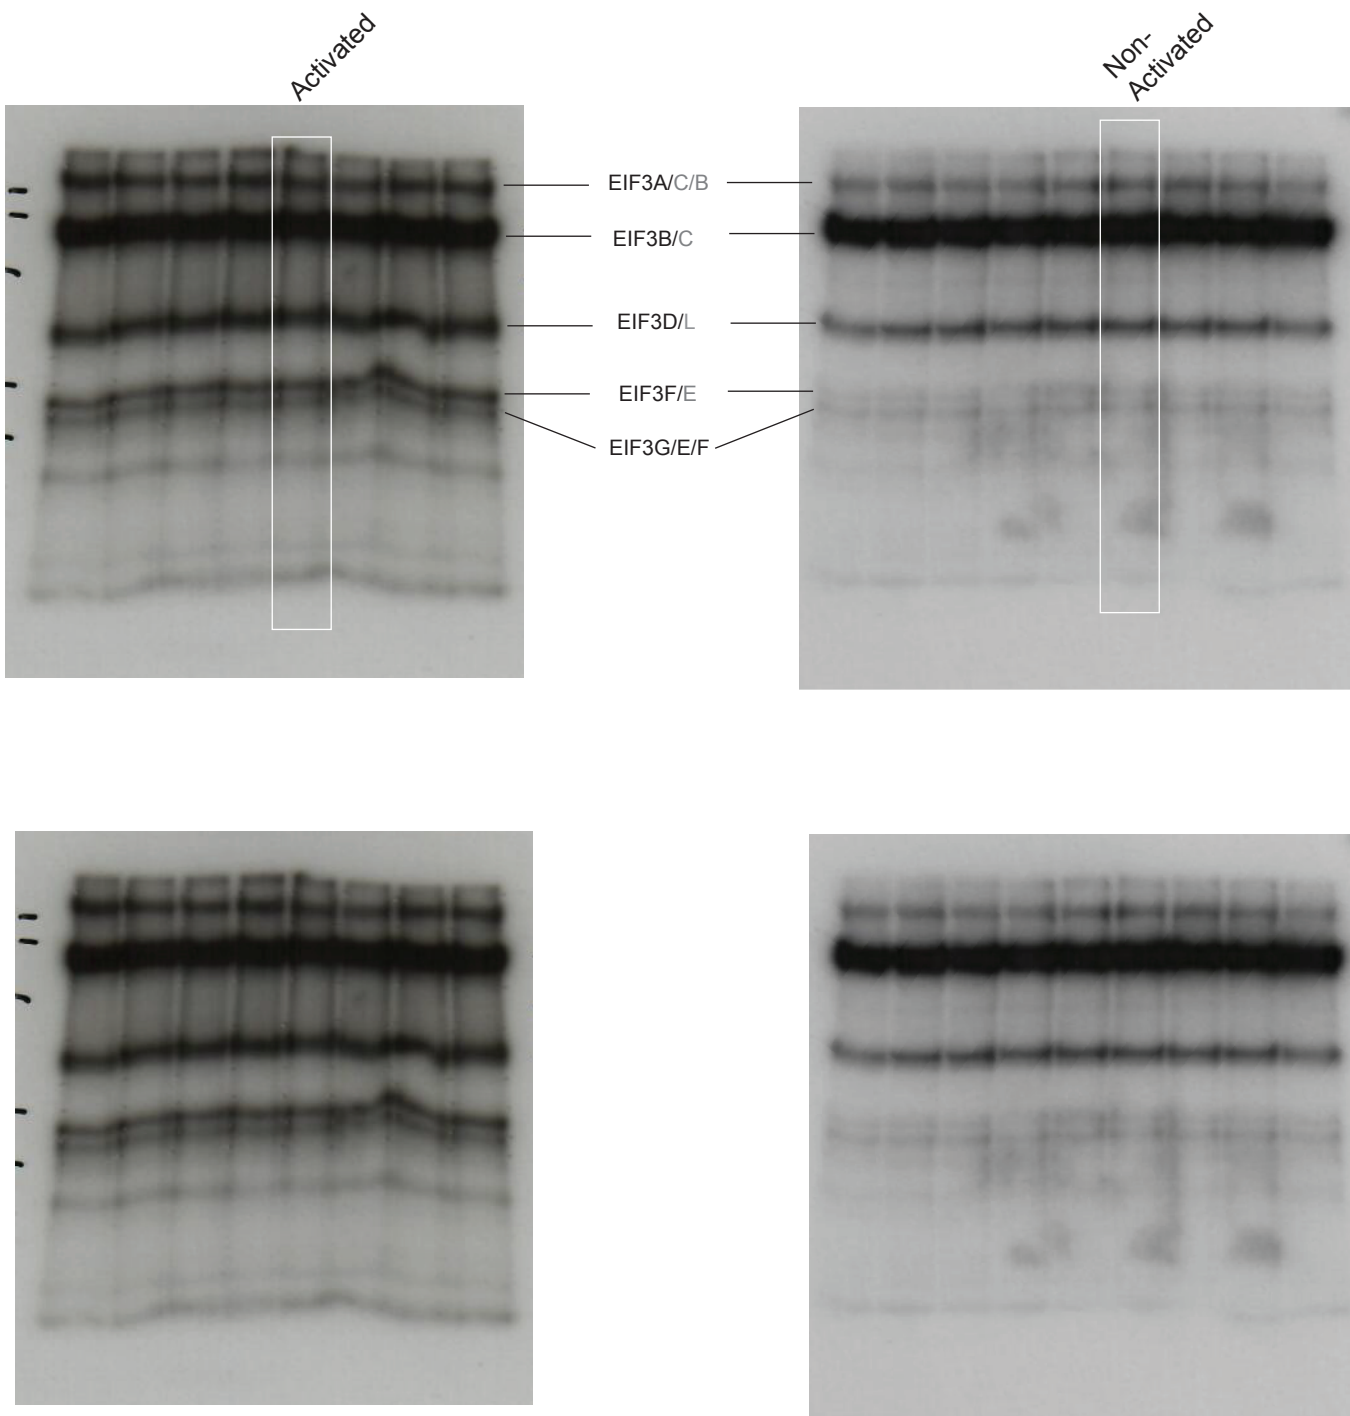

Supplement: supp [file elife-74272-supp-v1.zip]

Figure 2—figure supplement 1

**A**

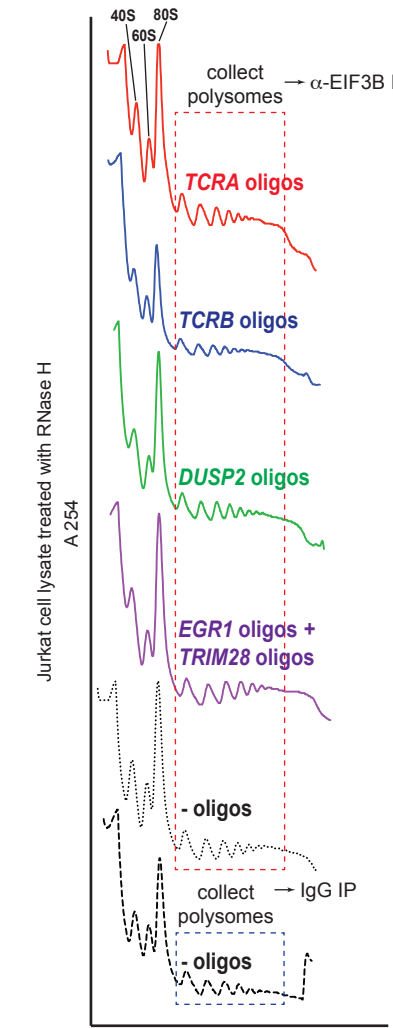

**B**

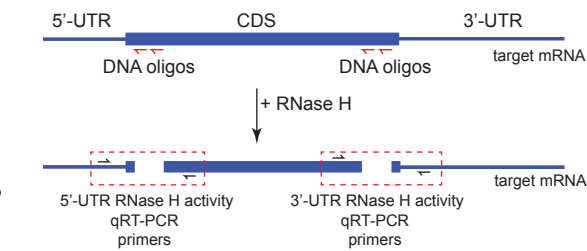

**C**

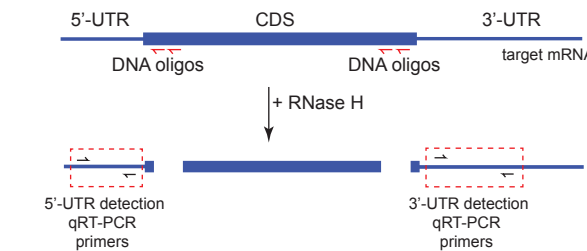

**D**

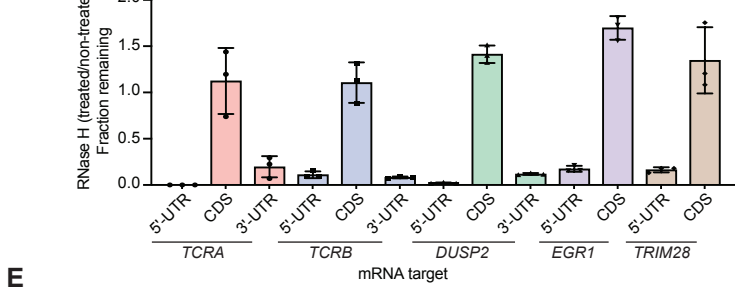

**E**

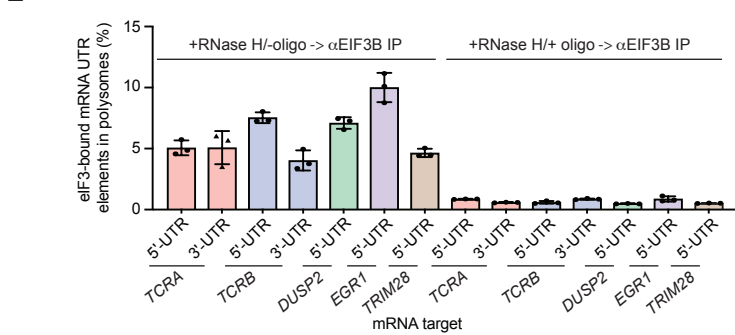

**G**

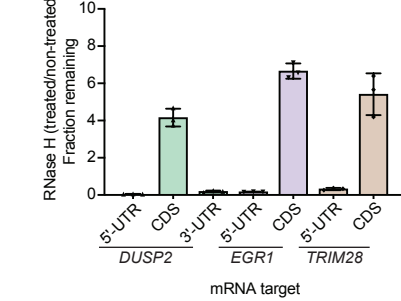

**H**

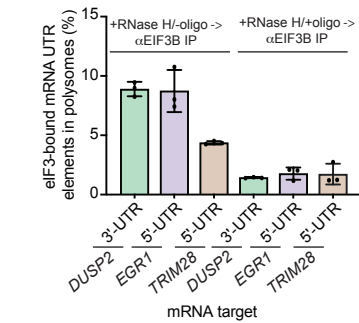

**F**

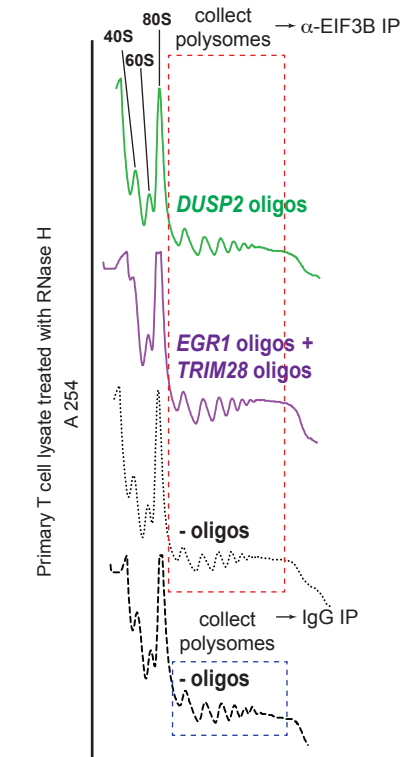

Supplement: supp [file elife-74272-supp-v1.zip]

Figure\_4\_S1

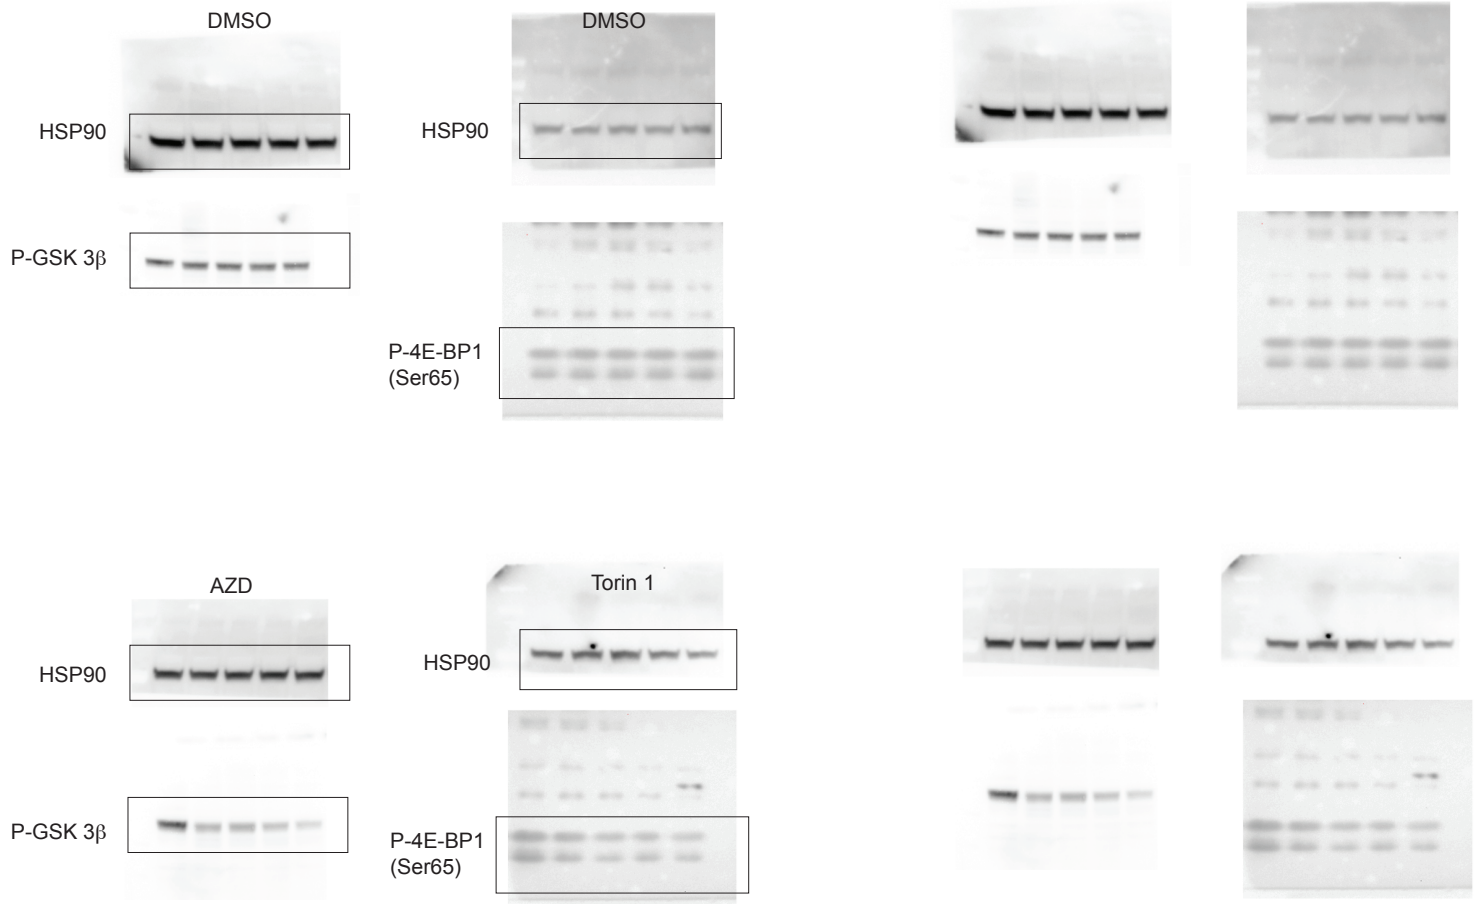

Supplement: supp [file elife-74272-supp-v1.zip]

Figure 1–figure supplement 2

A

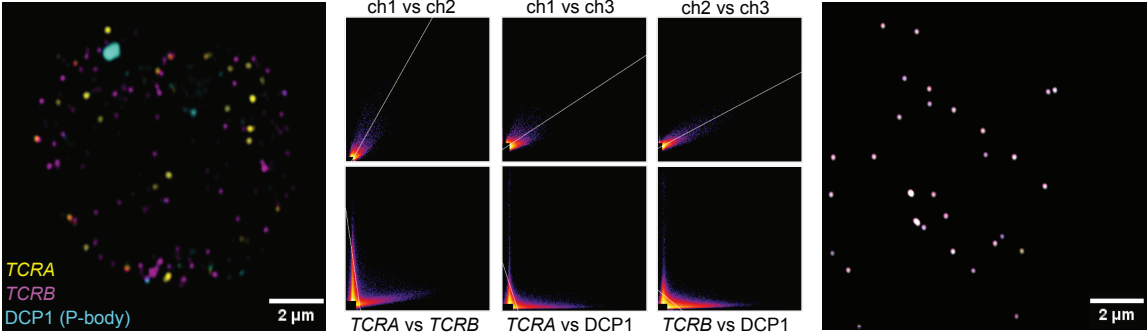

B

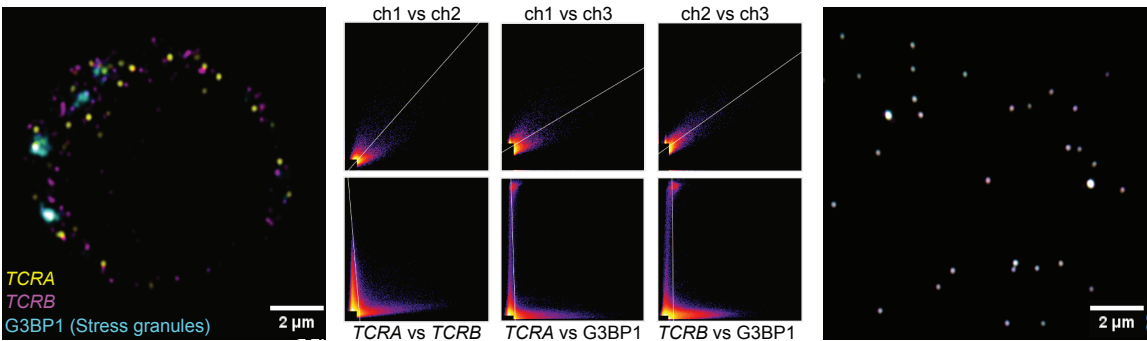

Supplement: supp [file elife-74272-supp-v1.zip]

Figure 5—figure supplement 5

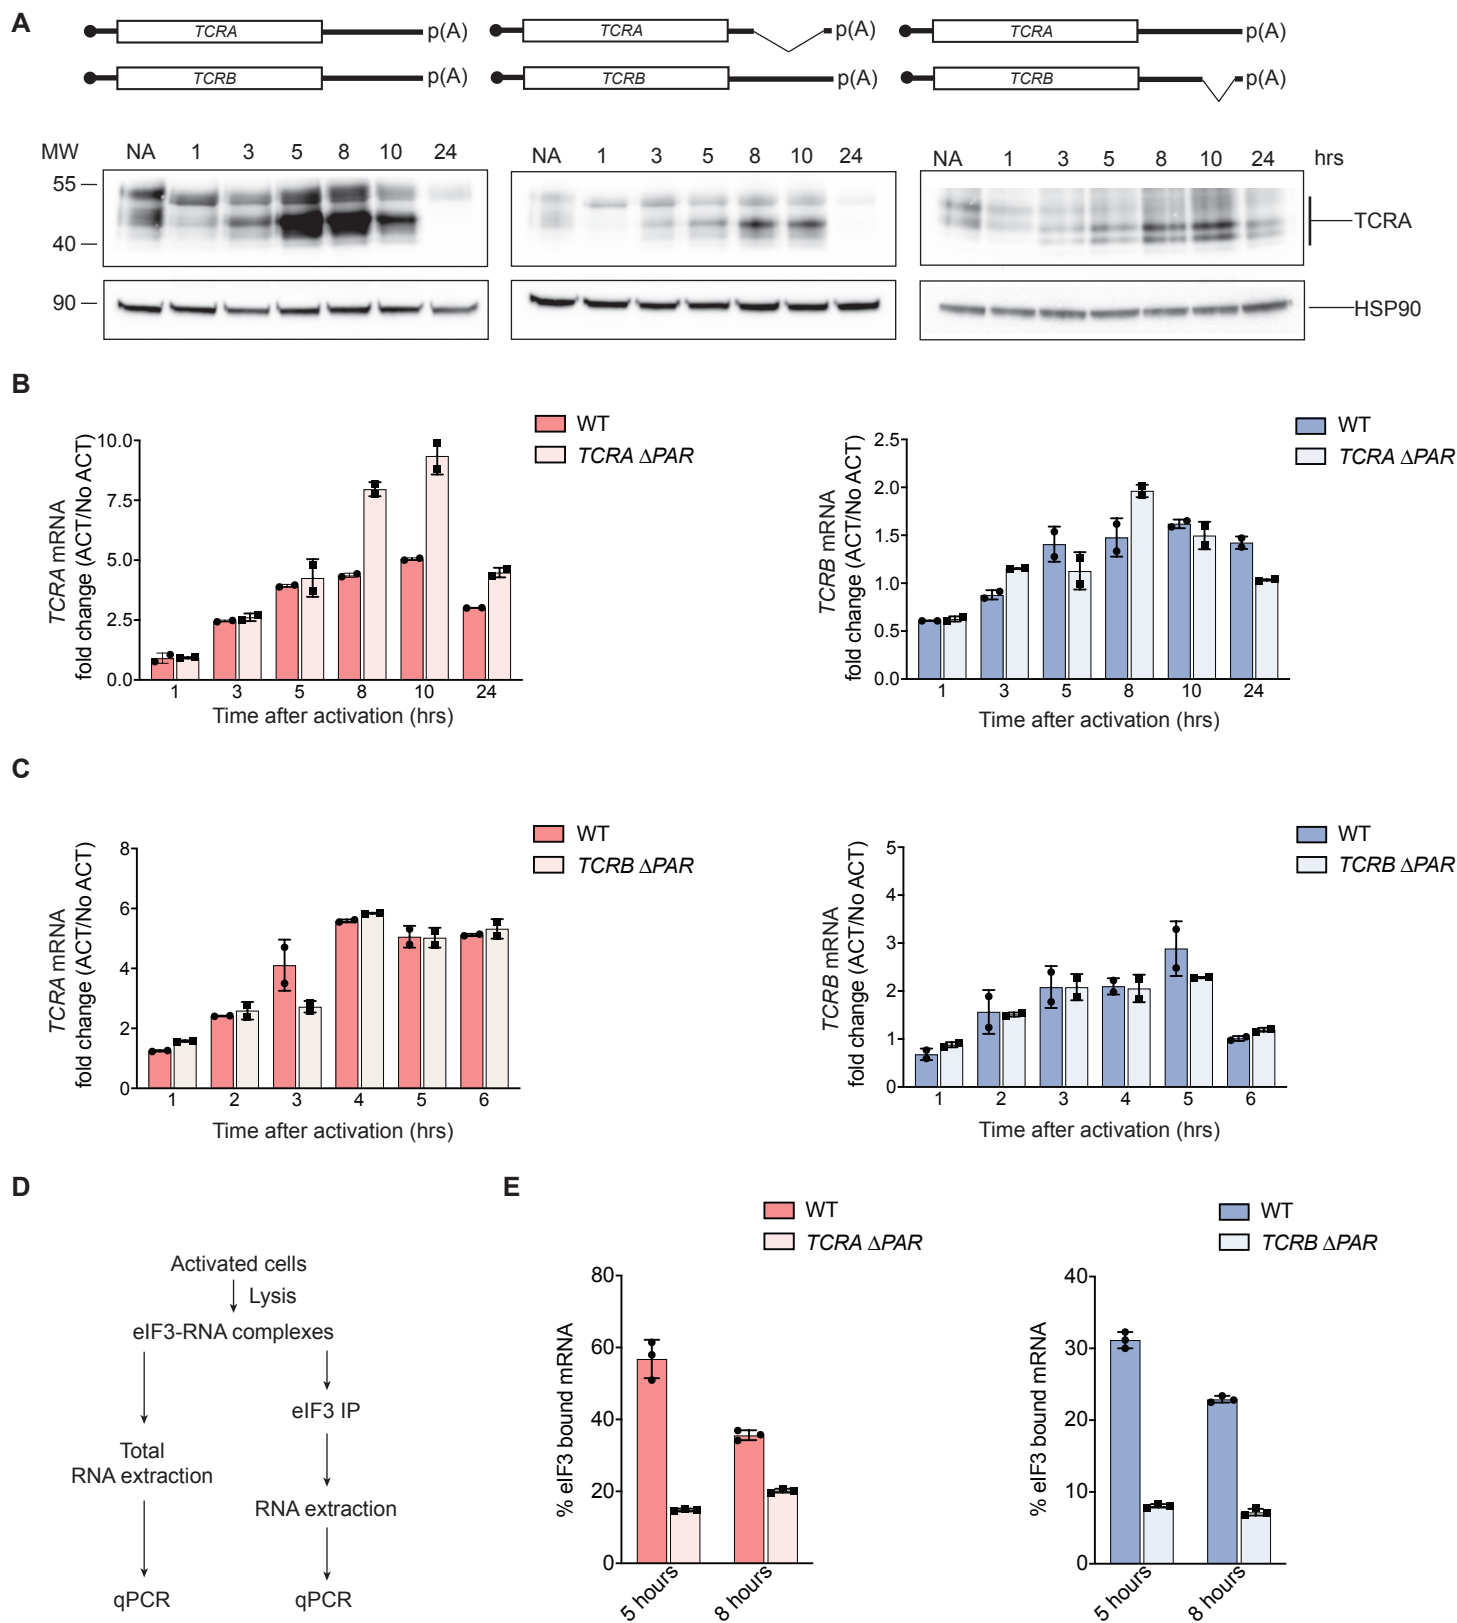

Supplement: supp [file elife-74272-supp-v1.zip]

Figure 5-figure supplement 2

CD8+ T cells

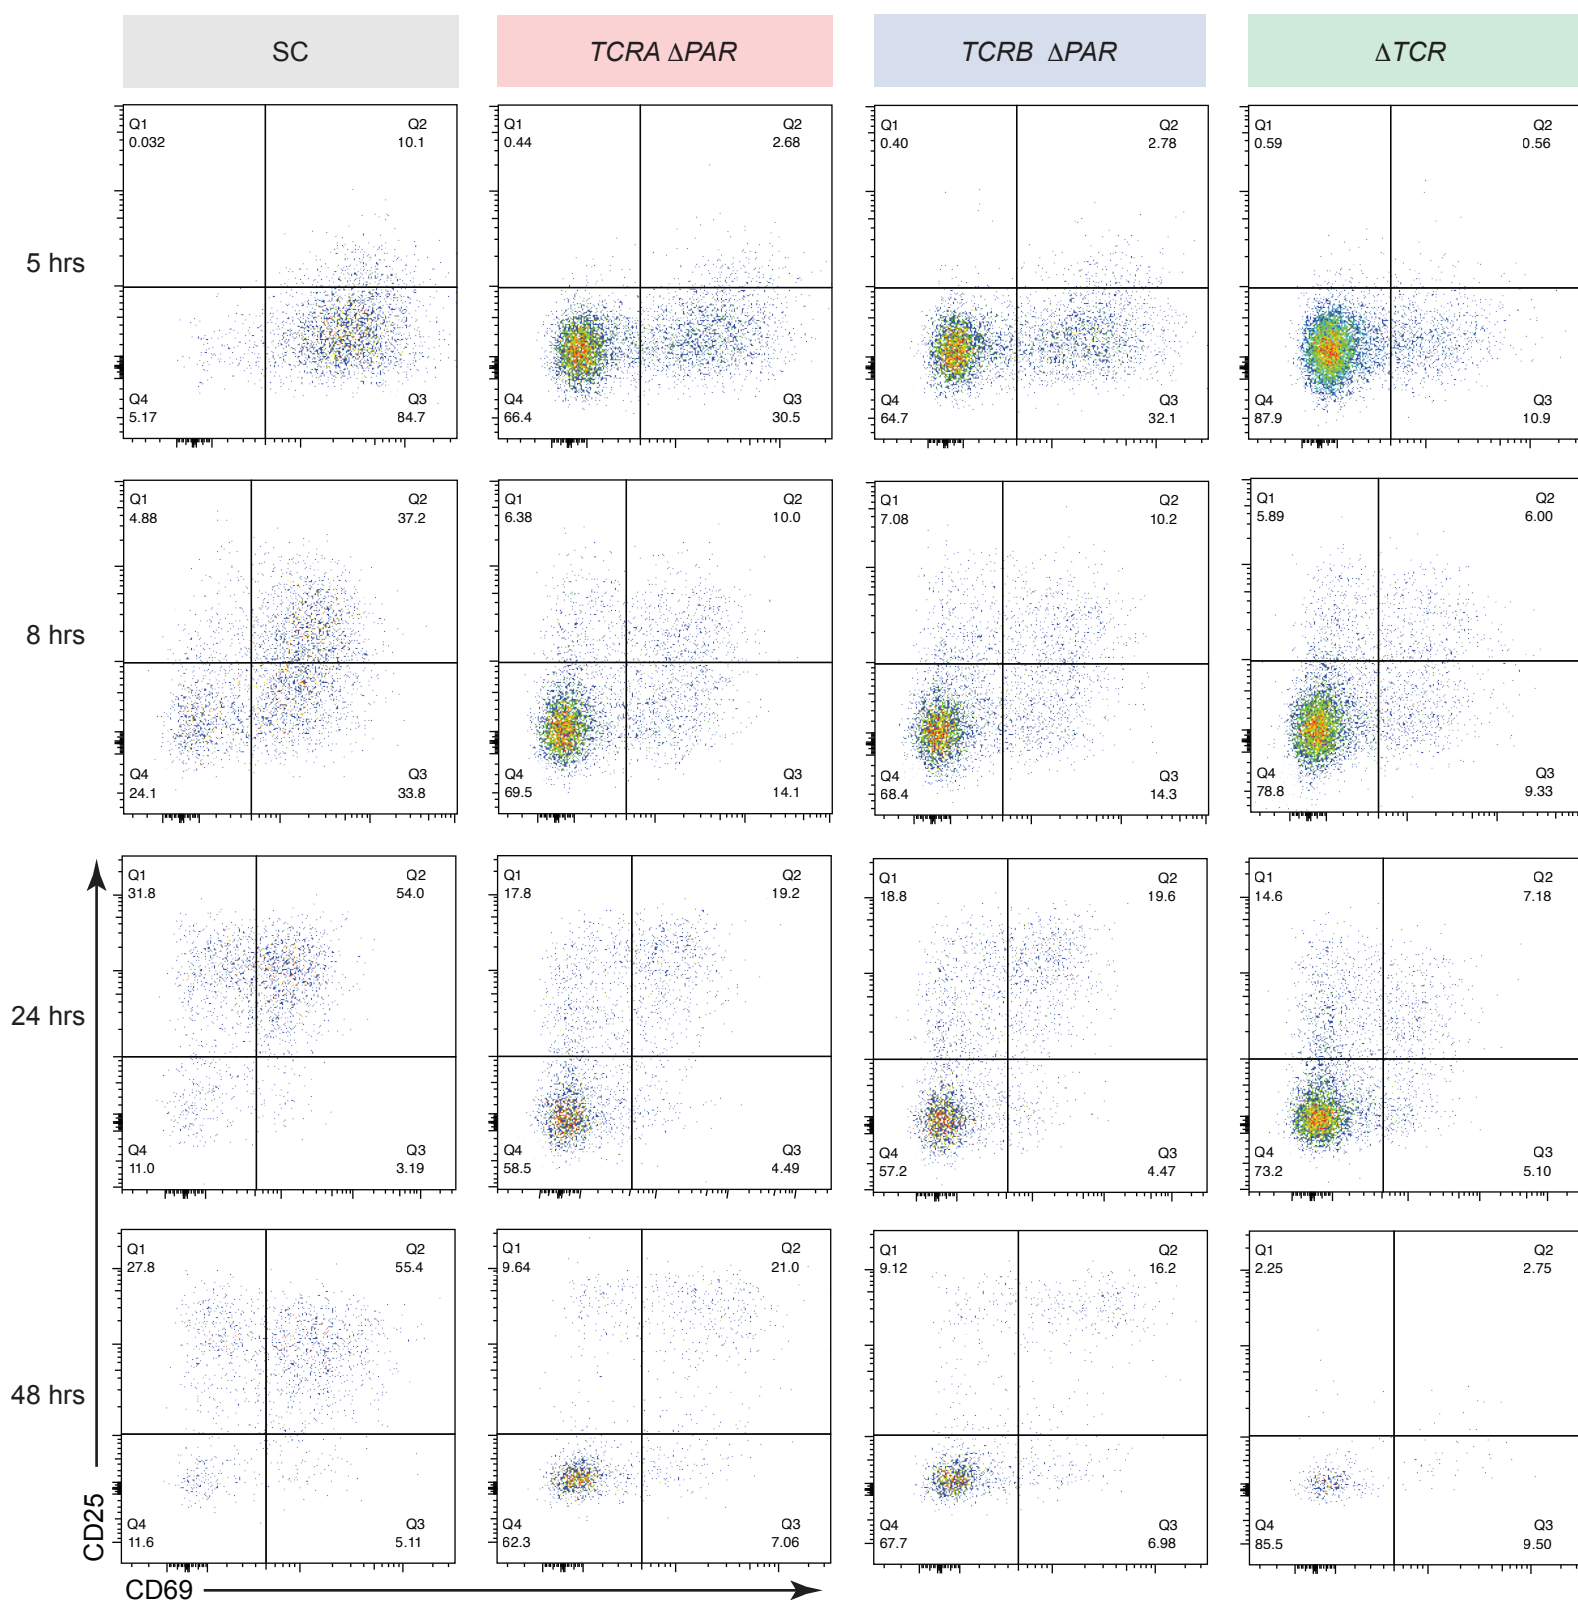

Supplement: supp [file elife-74272-supp-v1.zip]

Figure 6—figure supplement 3

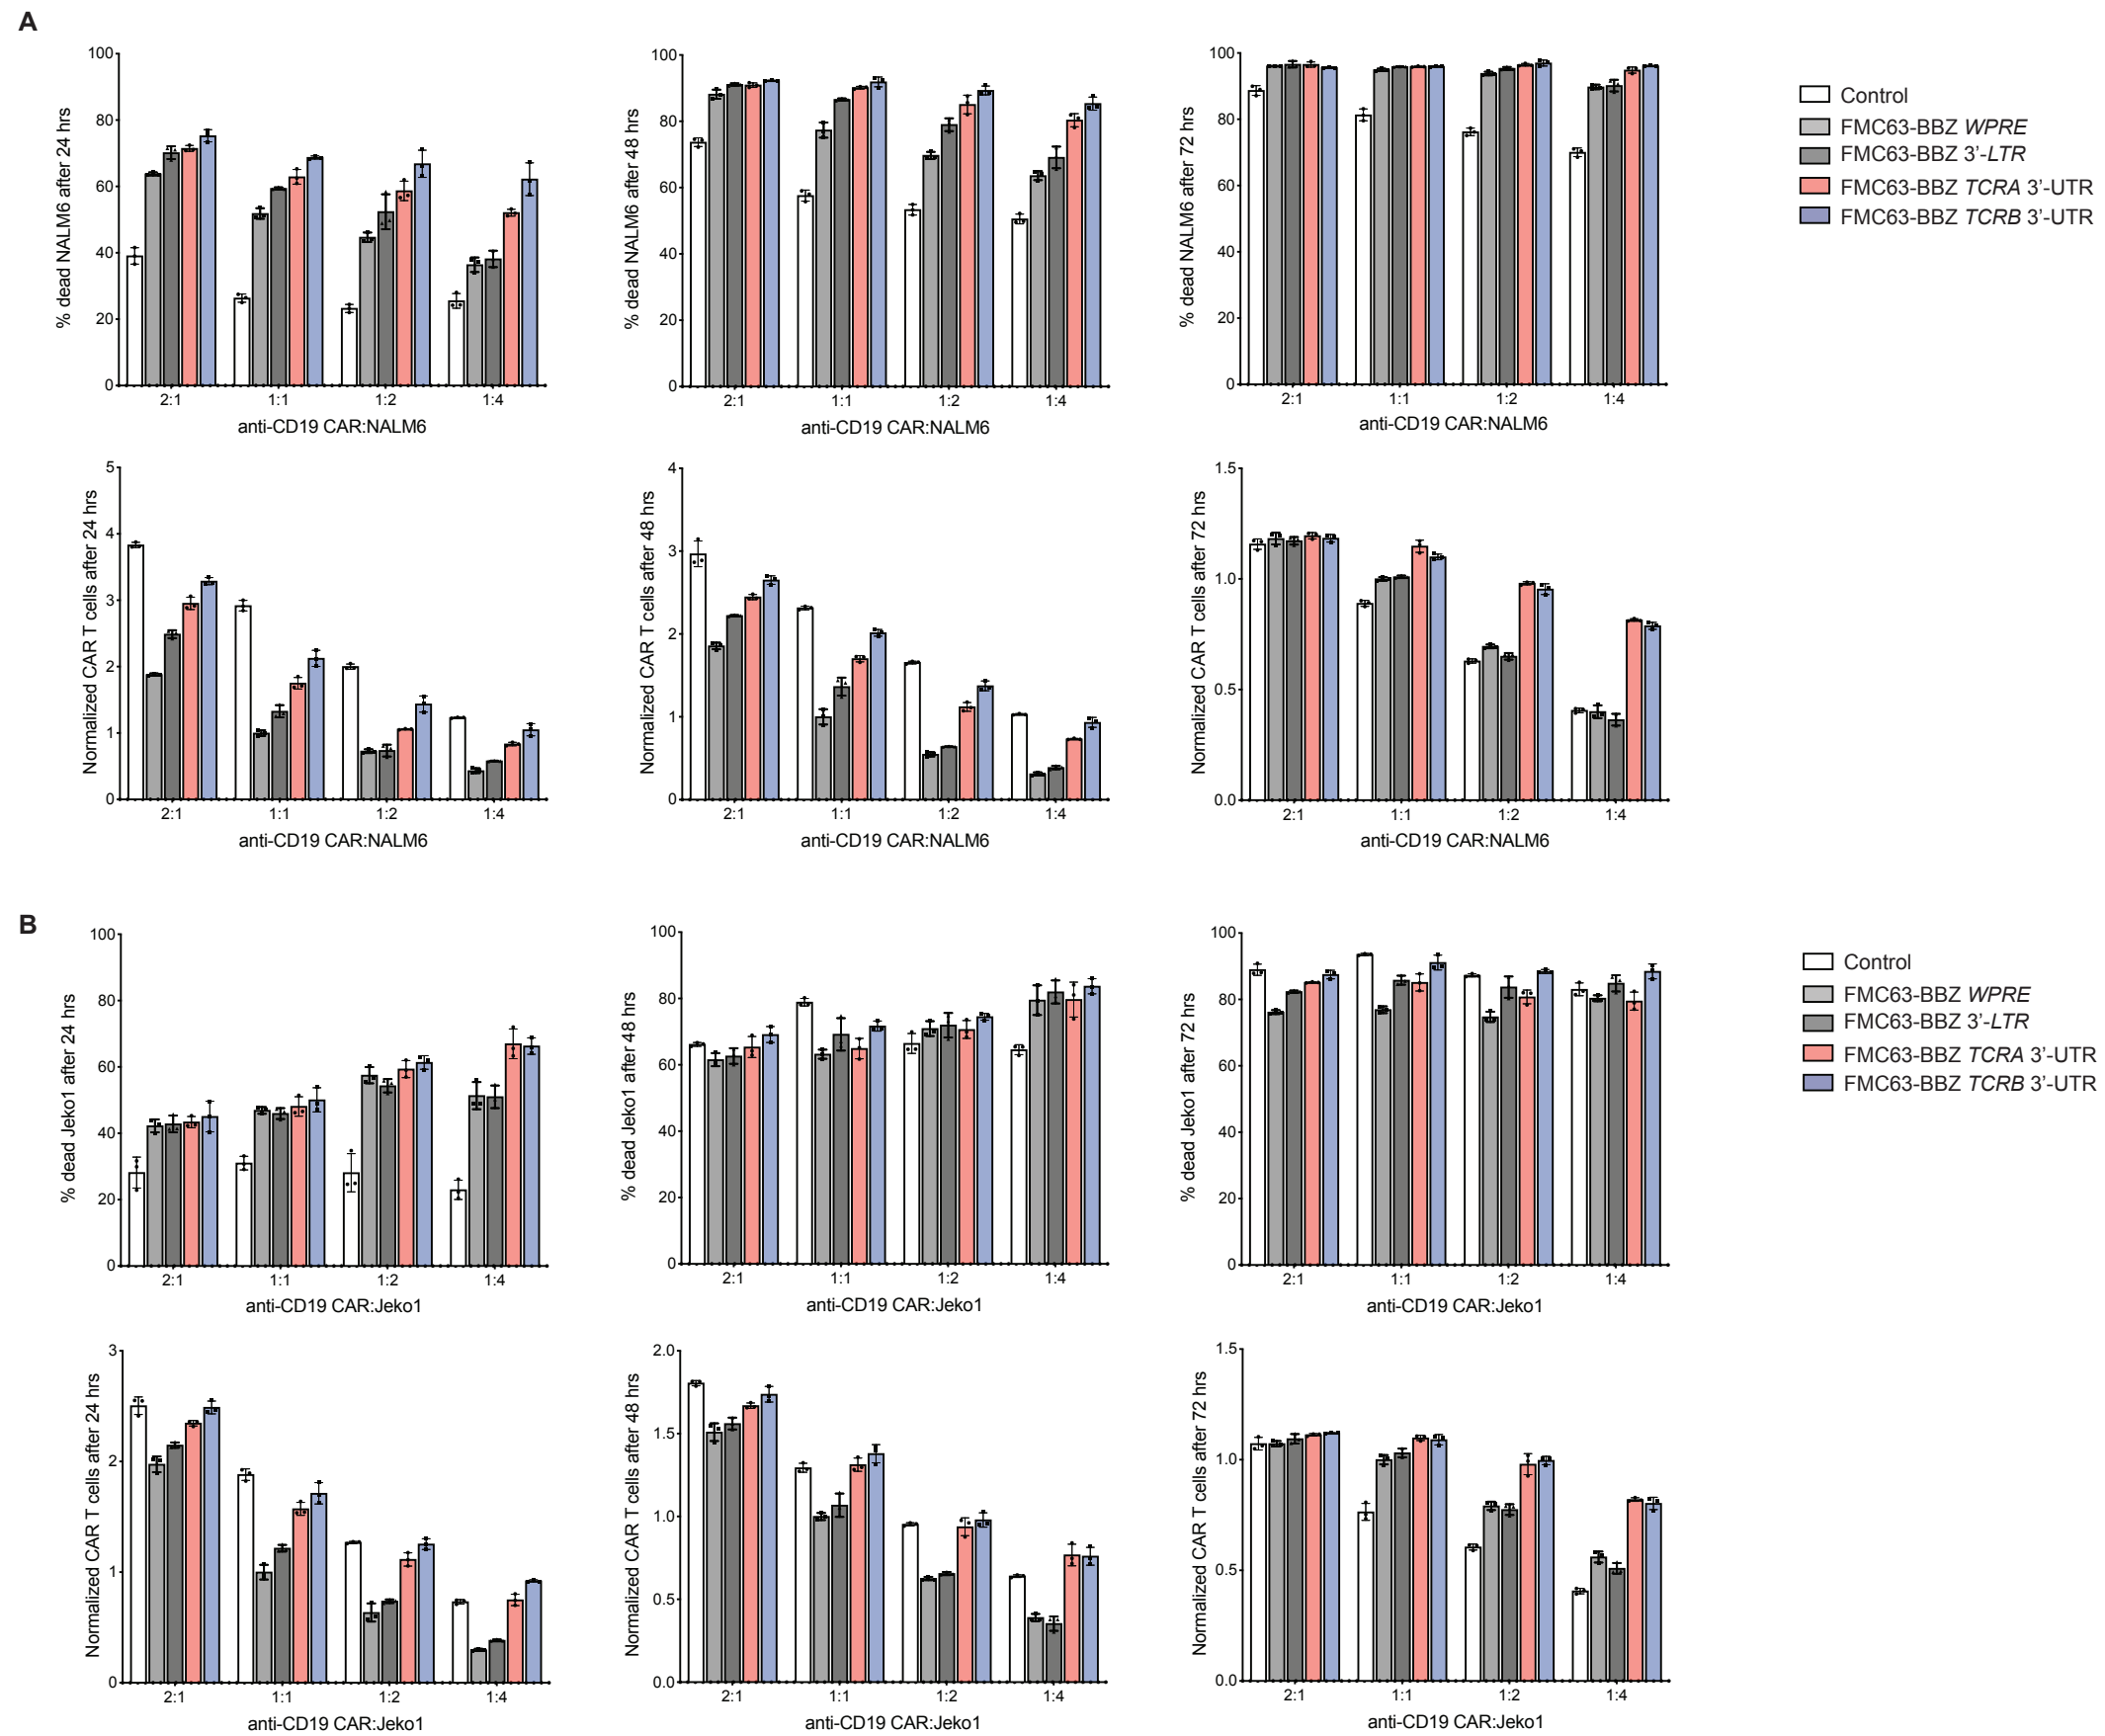

Supplement: supp [file elife-74272-supp-v1.zip]

Figure\_1\_S1A

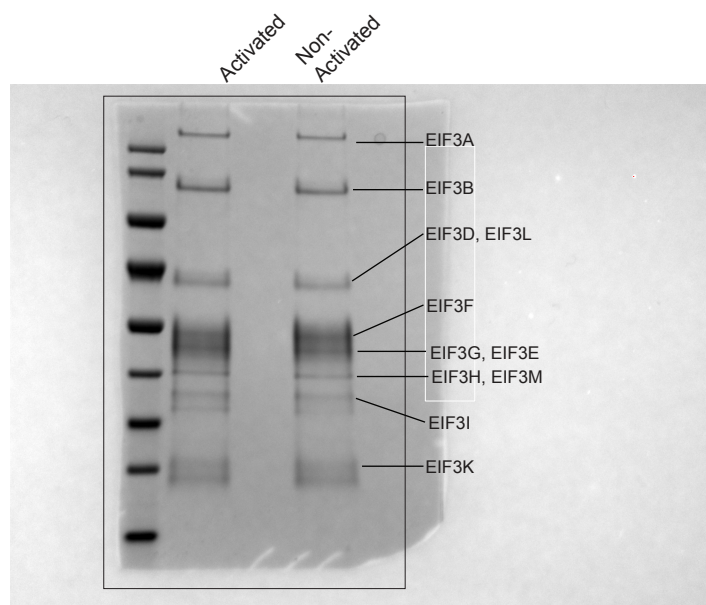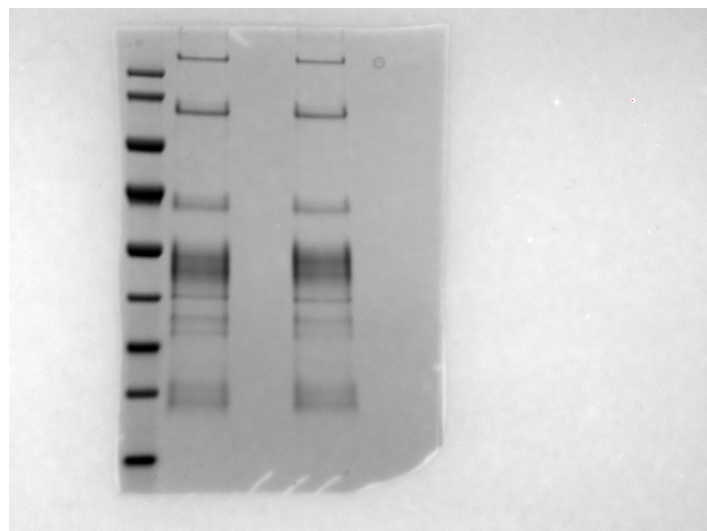

Supplement: supp [file elife-74272-supp-v1.zip]

Figure 5-figure supplement 3

CD4+ T cells

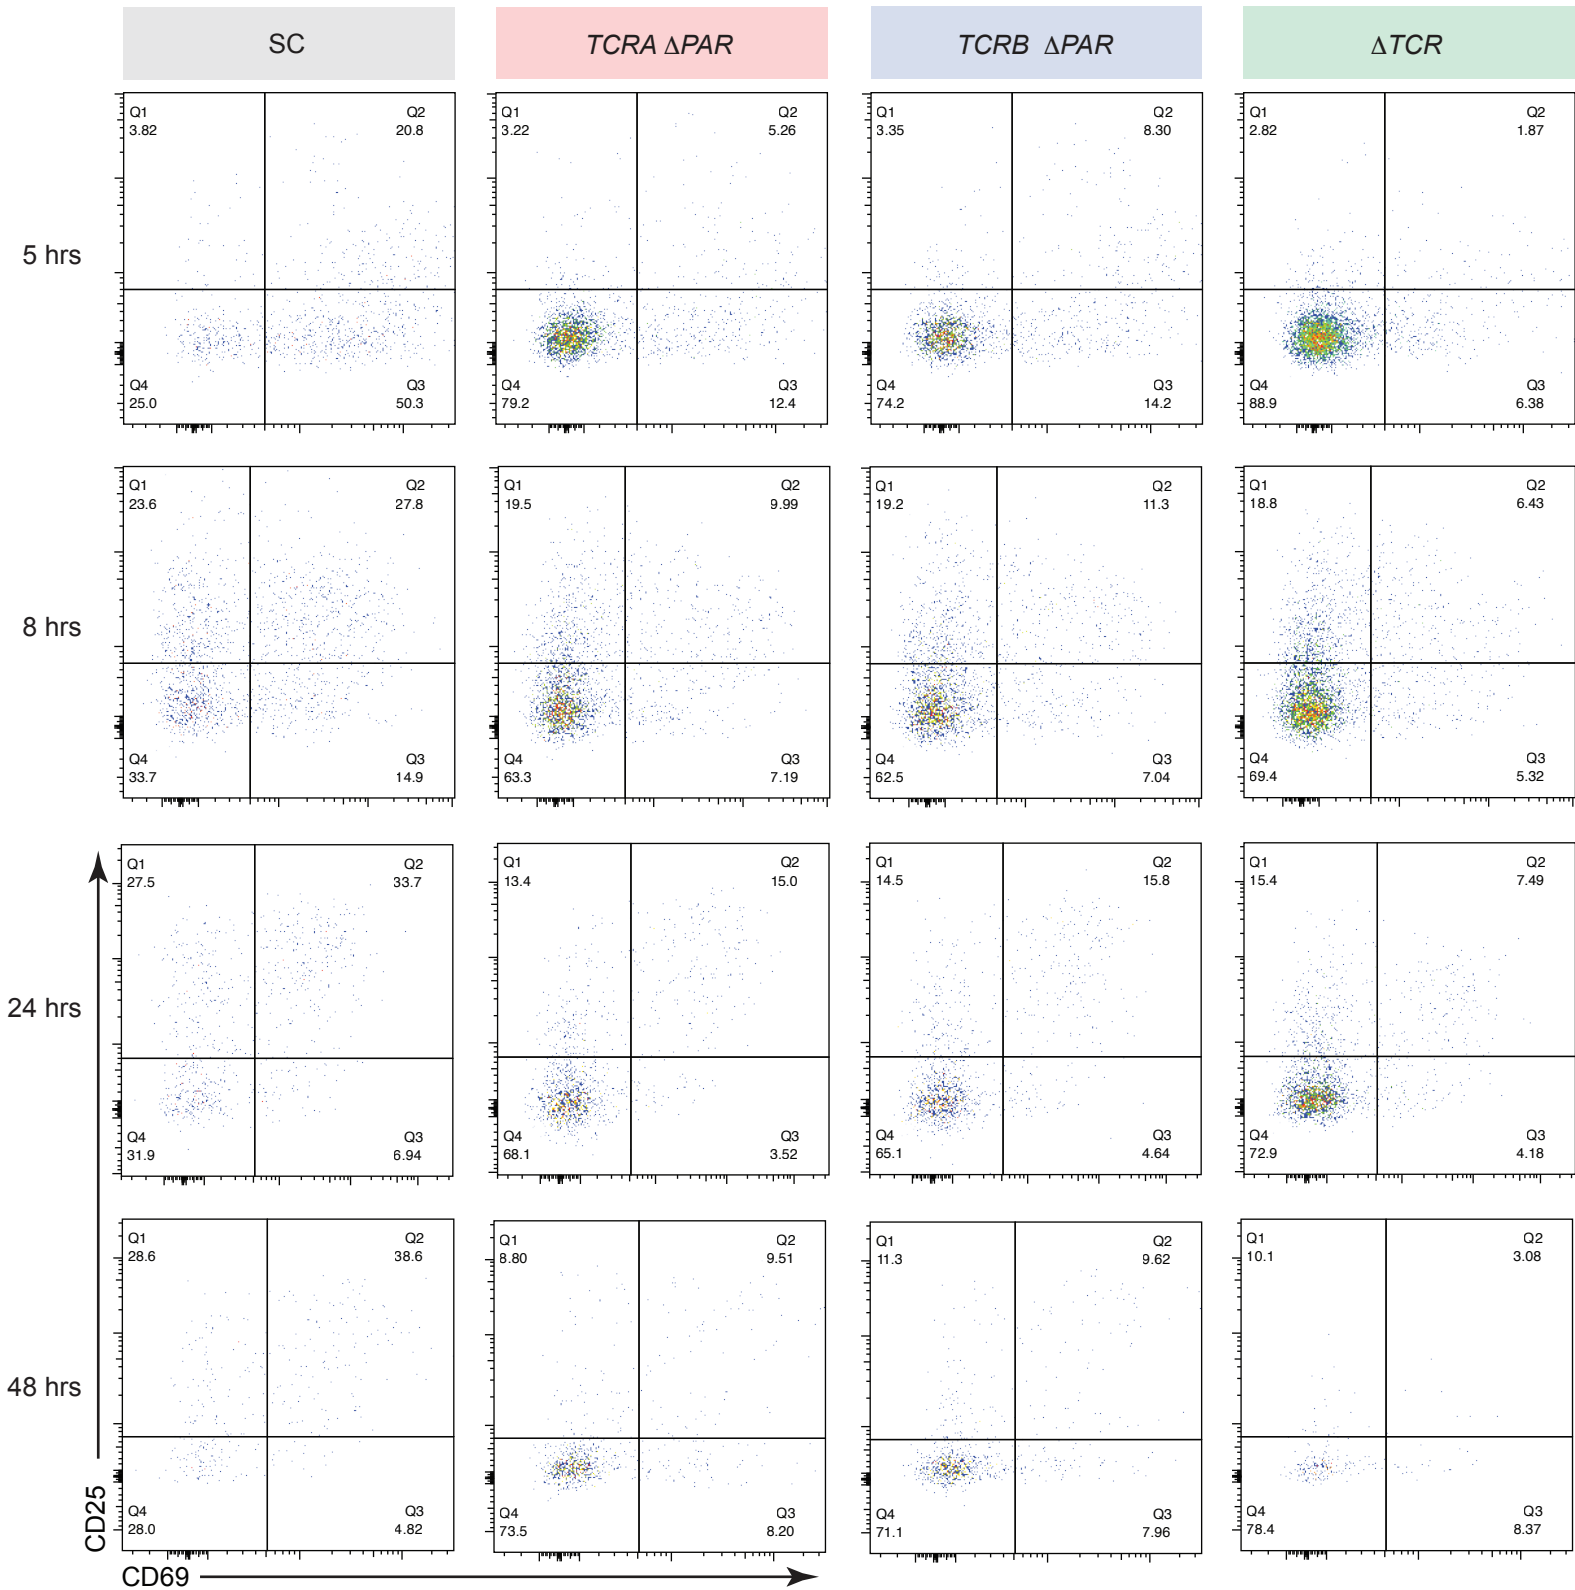

Supplement: supp [file elife-74272-supp-v1.zip]

Figure 5—figure supplement 1

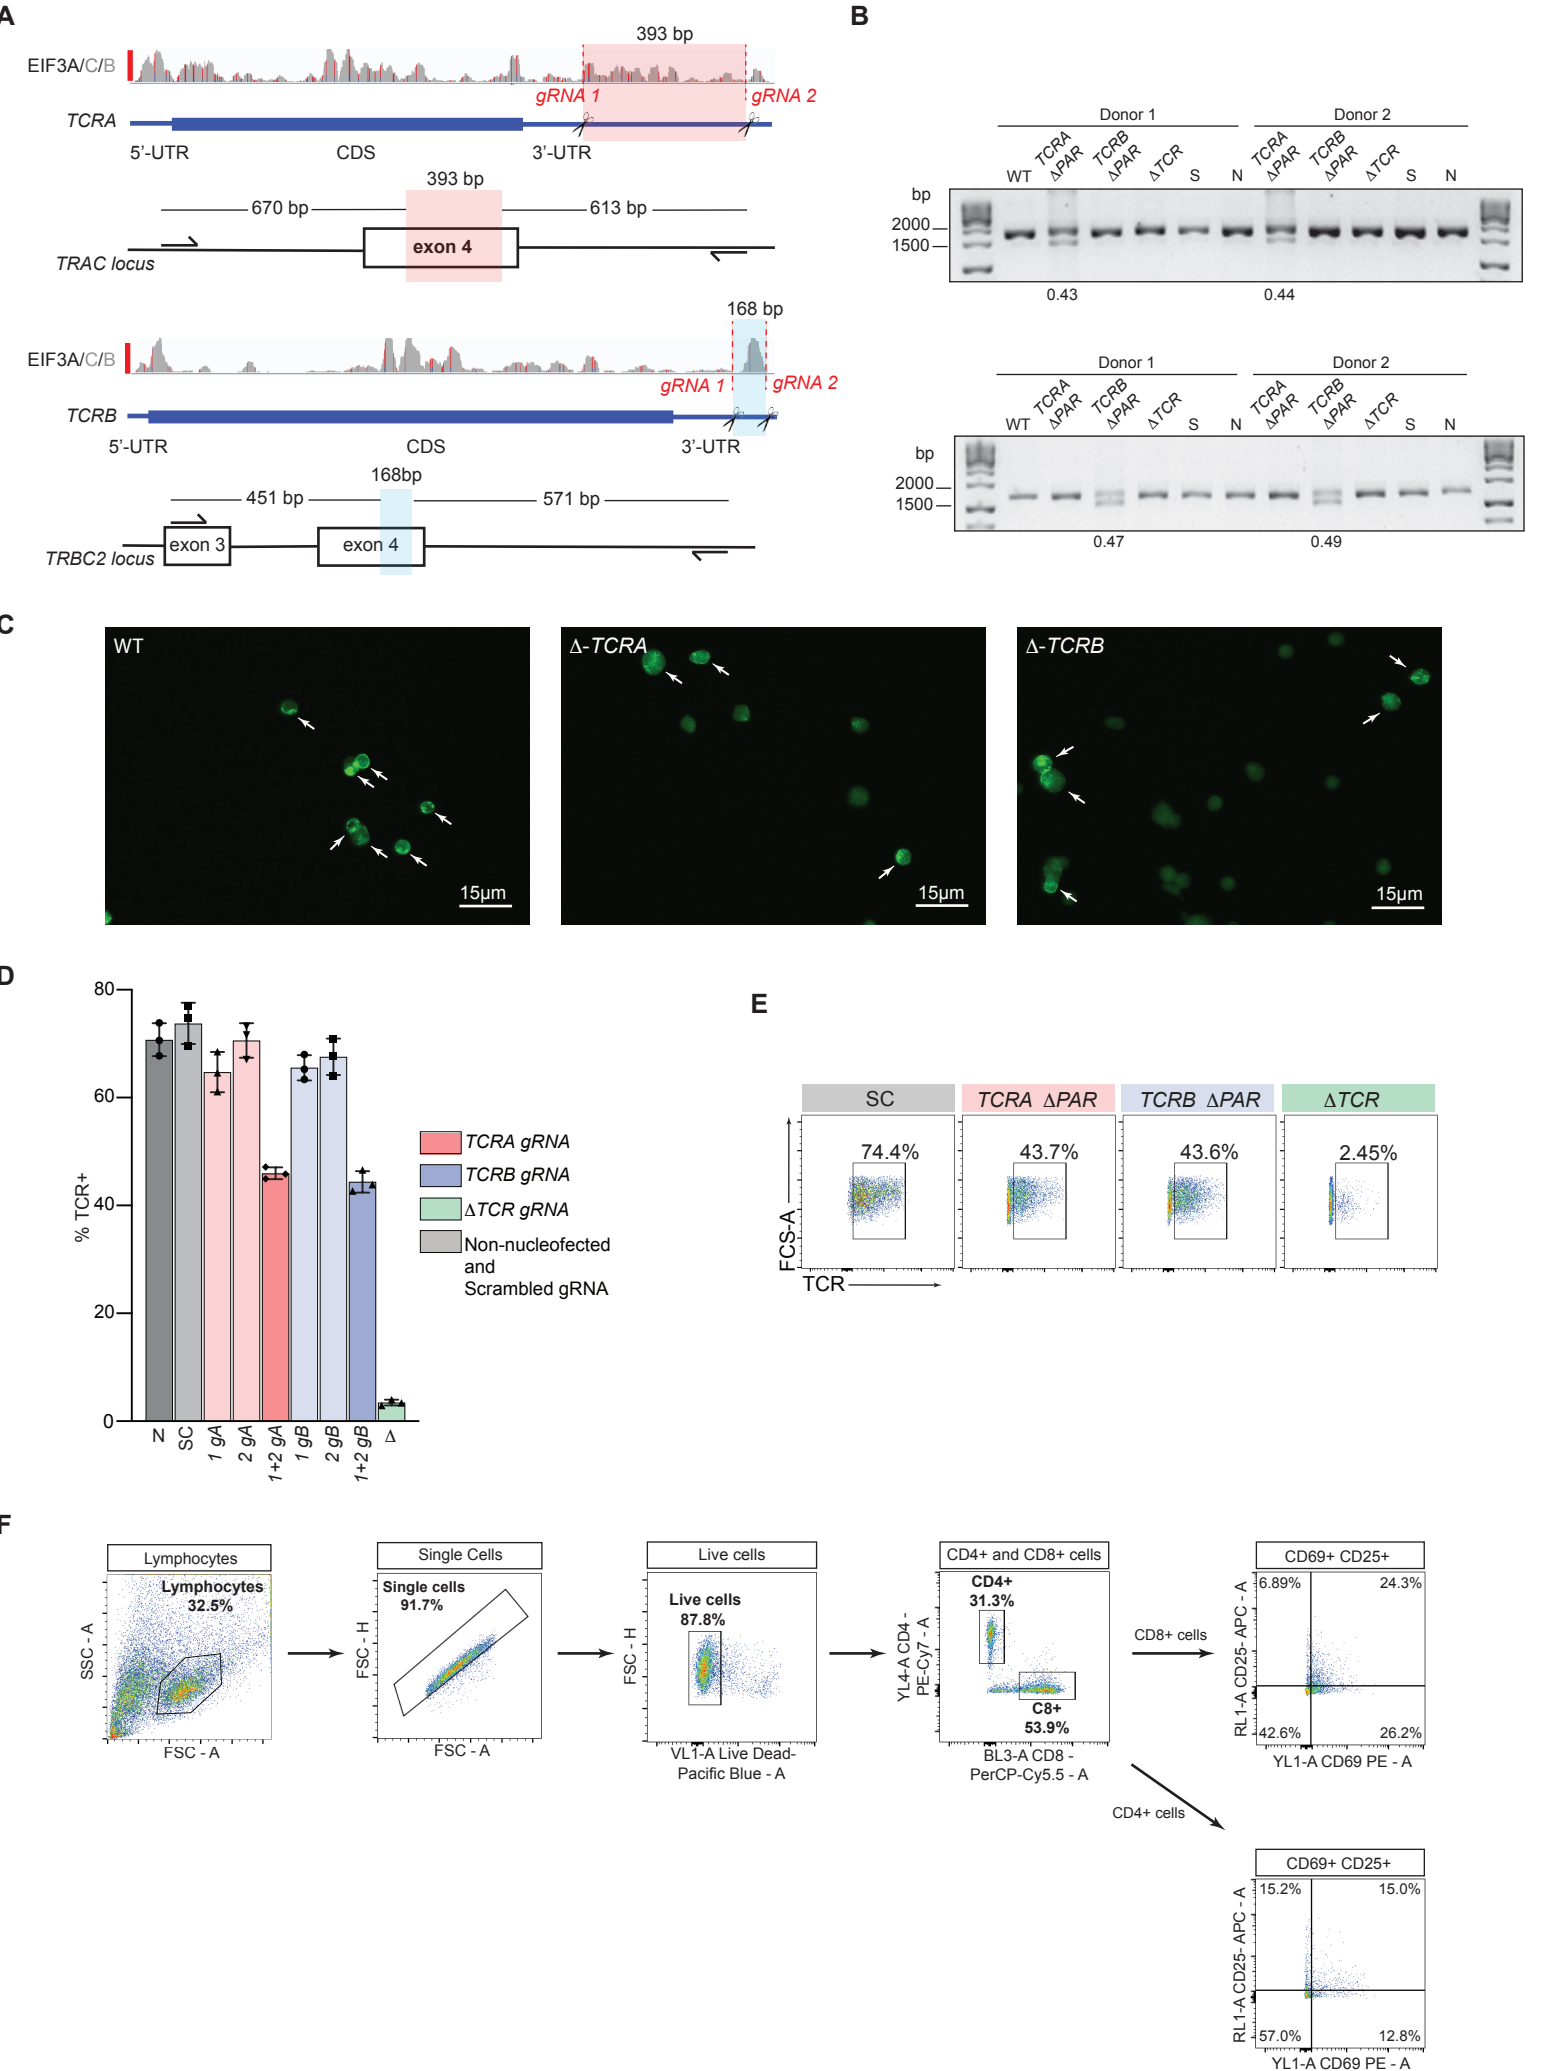

Supplement: supp [file elife-74272-supp-v1.zip]

Figure 5-figure supplement 4

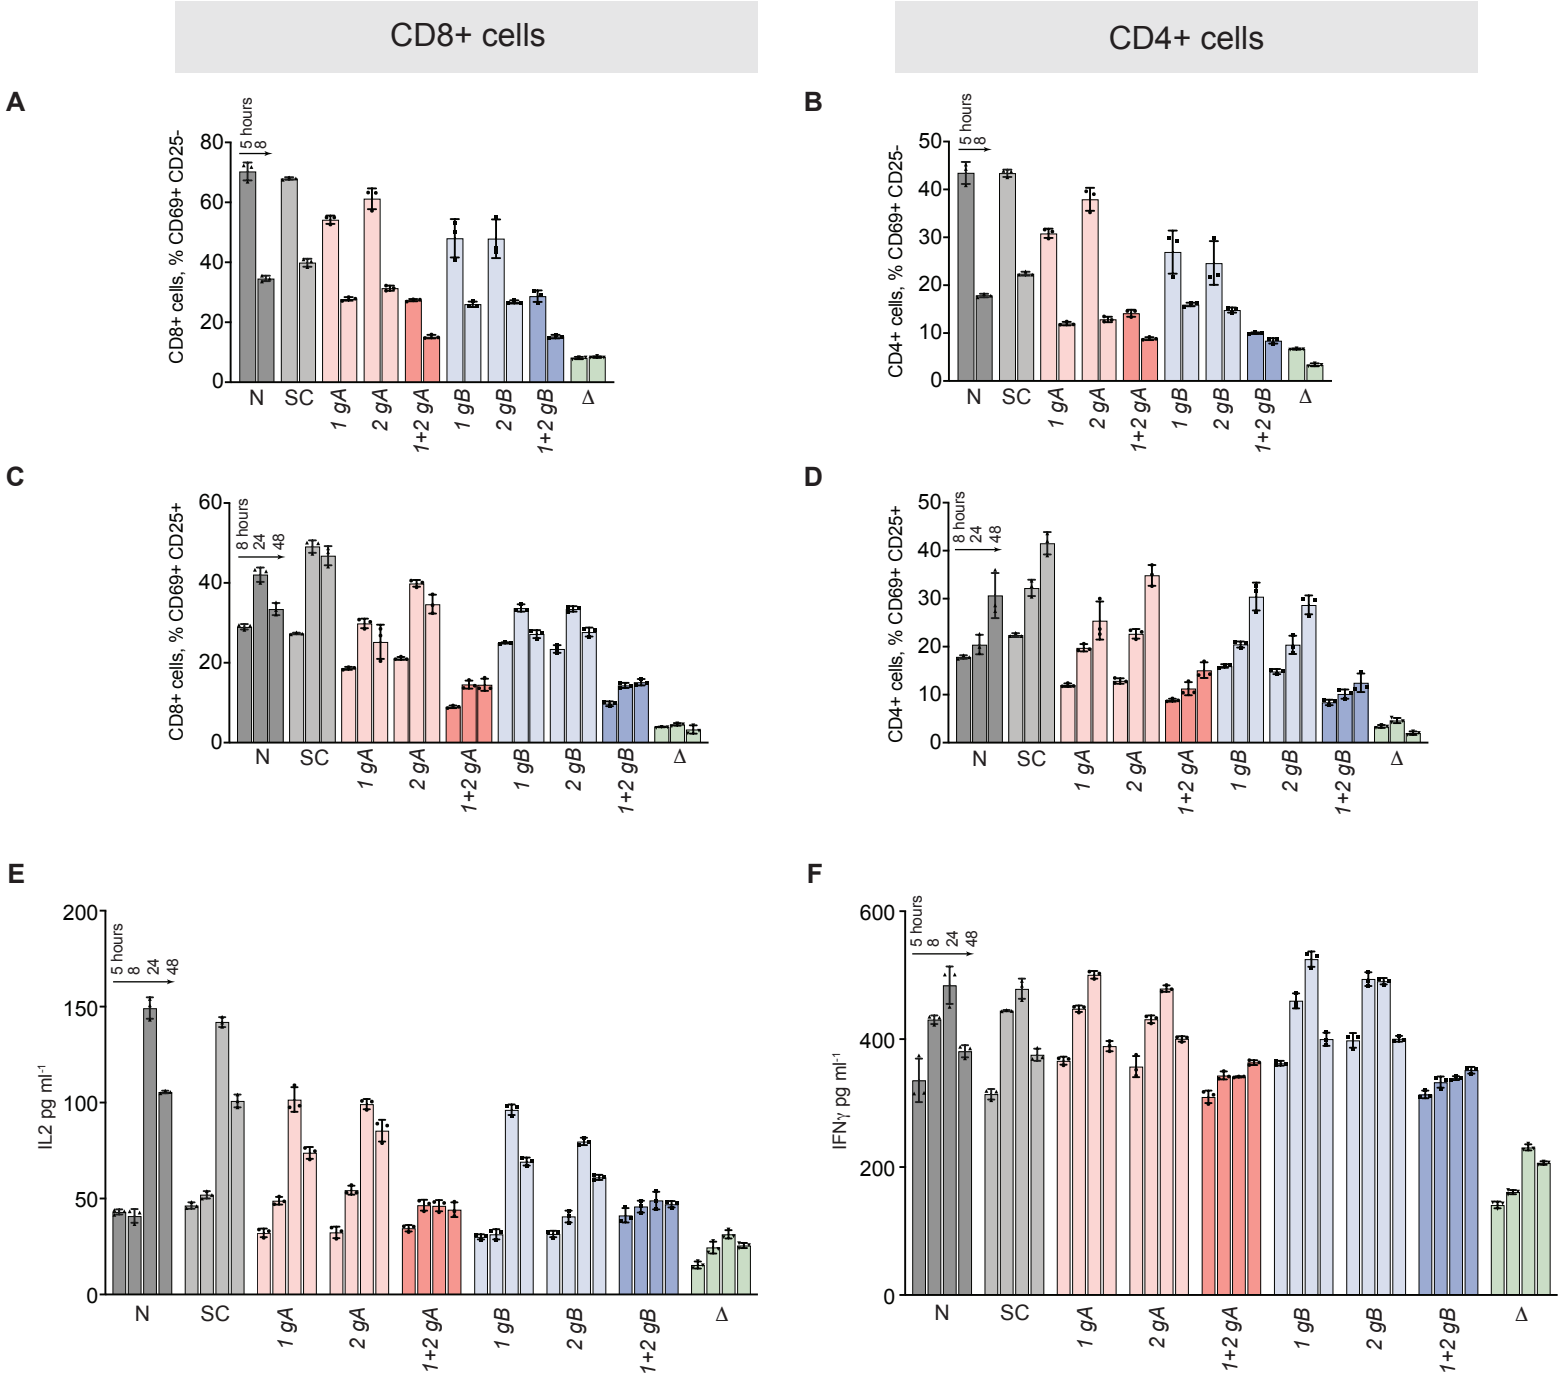

Supplement: supp [file elife-74272-supp-v1.zip]

Figure\_5\_S1

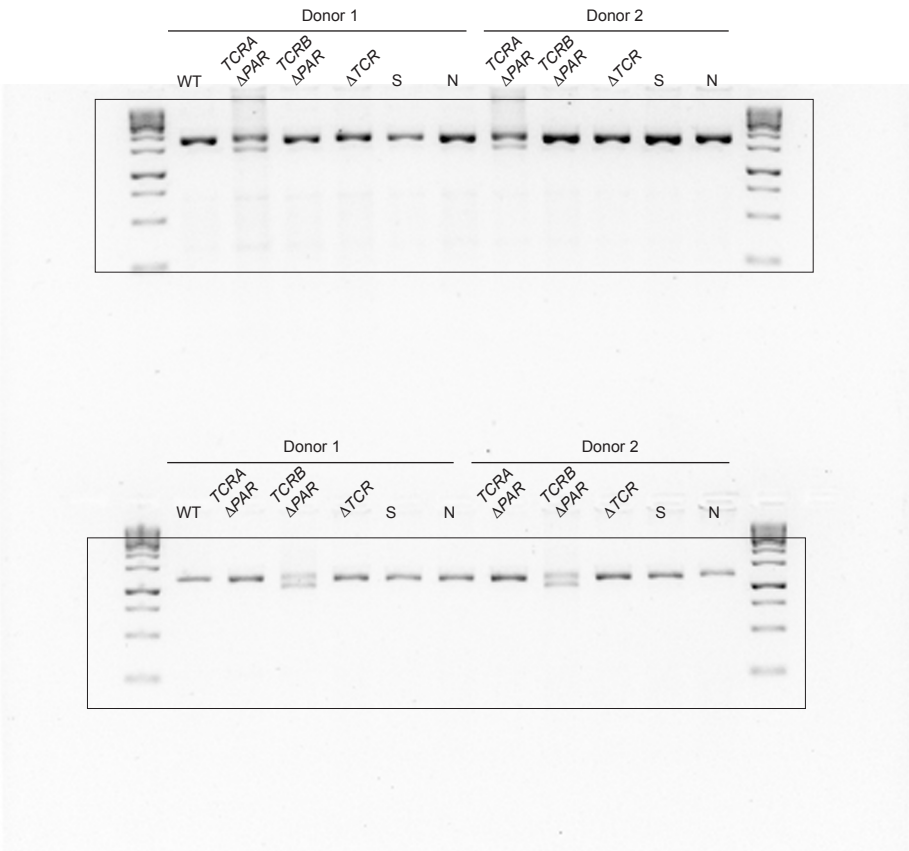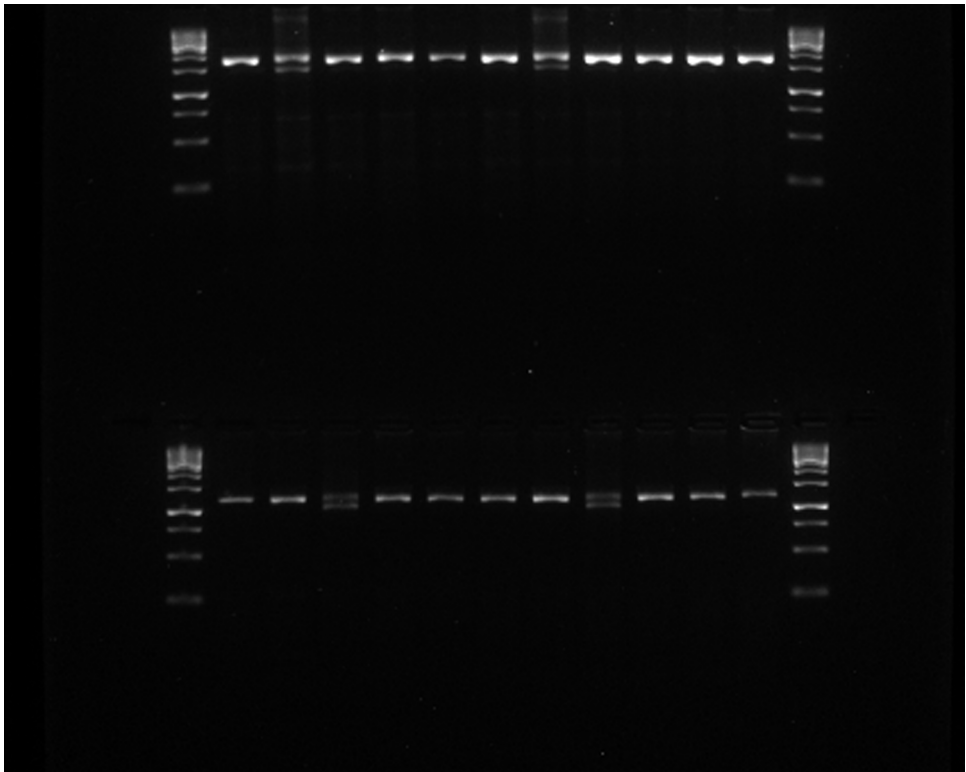

Supplement: supp [file elife-74272-supp-v1.zip]

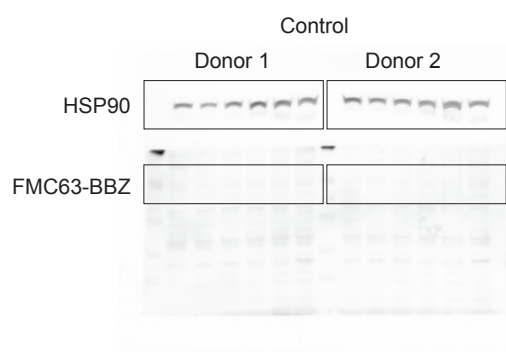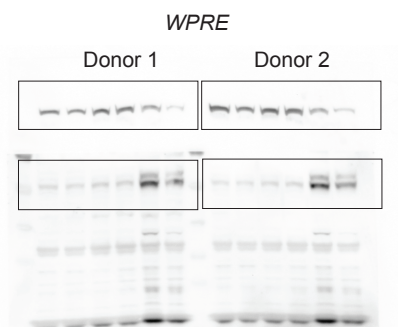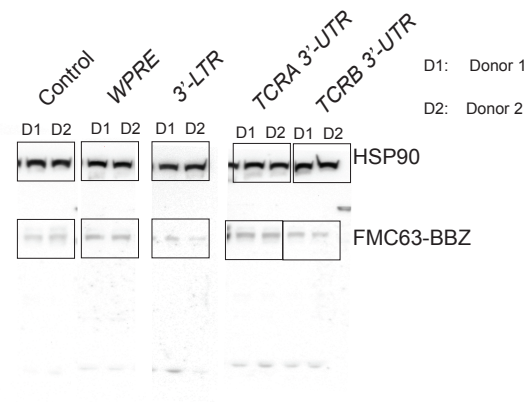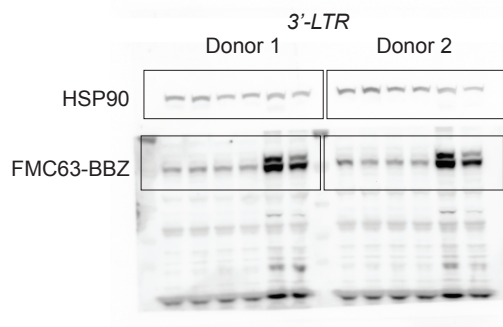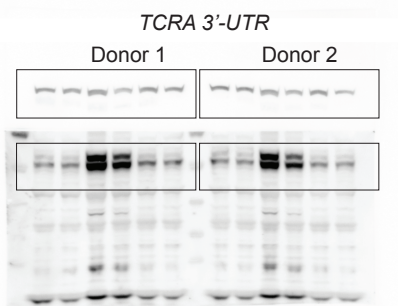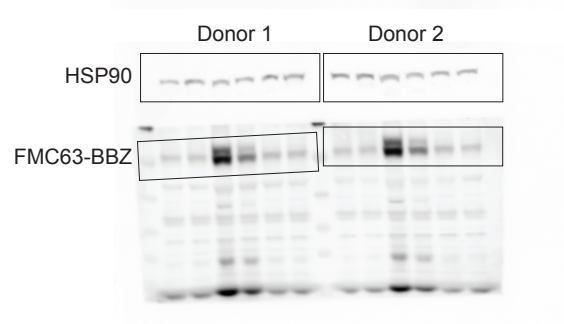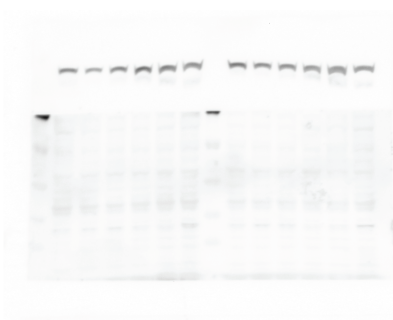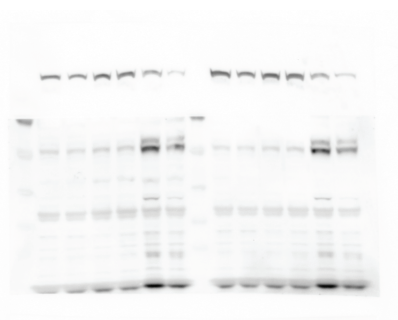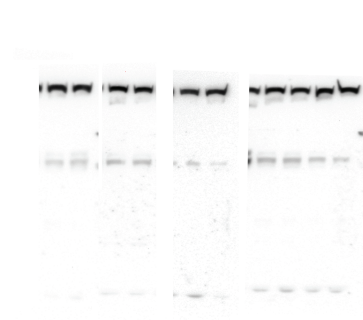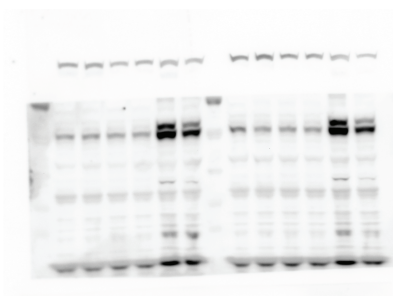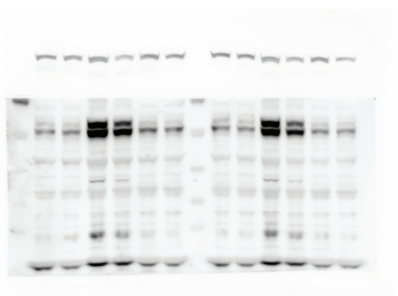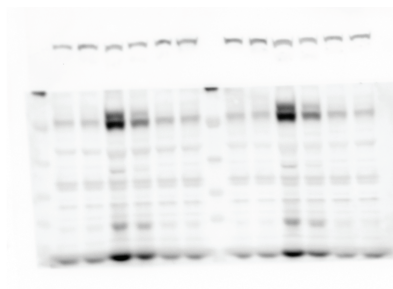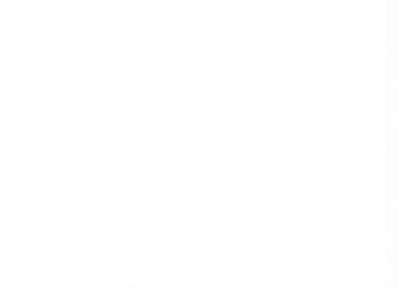

Supplement: supp [file elife-74272-supp-v1.zip]
